# Supplementary material
Source: publisher figshare collection journal article supplement (https://geolsoc.figshare.com/ndownloader/files/34180003)
Supplement: Supplementary file 1 [file 34180003]

79 12784
Lithobius_fortificatus         XXXXXXXXXXXXXXXXXXXXXXXXXXXXXXXXXXXXXXXXXXXXXXXXXXXXXXXXXXXXXXXXXXXXXXXXXXXXXXXXXXXXXXXXXXXXXXXXXXXXXXXXXXXXXXXXXXXXXXXXXXXXXXXXXXXXXXXXXXXXXXXXXXXXXXXXXXXXXXXXXXXXXXXXXXXXXXXXXXXXXXXXXXXXXXXXXXXXXXXXXXXXXXXXXXXXXXXXXXXXXXXXXXXXXXXXXXXXXXXXXXXXXXXXXXXXXXXXXXXXXXXXXXXXXXXXXXXXXXXXXXXXXXXXXXXXXXXXXXXXXXXXXXXXXXXXXXXXXXXXXXXXXXXXXXXXXXXXXXXXXXXXXXXXXXXXXXXXXXXXXXXXXXXXXXXXXXXXXXXXXXXXXXXXXXXXXXXXXXXXXXXXXXXXXXXXXXXXXXXXXXXXXXXXXXXXXXXXXXXXXXXXXXXXXXXXXXXXXXXXXXXXXXXXXXXXXXXXXXXXXXXXXXXXXXXXXXXXXXXXXXXXXXXXXXXXXXXXXXXXXXXXXXXXXXXXXXXXXXXXXXXXXXXXXXXXXXXXXXXXXXXXXXXXXXXXXXXXXXXXXXXXXXXXXXXXXXXXXXXXXXXXXXXXXXXXXXXXXXXXXXXXXXXXXXXXXXXXXXXXXXXXXXXXXXXXXXXXXXXXXXXXXXXXXXXXXXXXXXXXXXXXXXXXXXXXXXXXXXXXXXXXXXXXXXXXXXXXXXXXXXXXXXXXXXXXXXXXXXXXXXXXXXXXXXXXXXXXXXXXXXXXXXXXXXXXXXXXXXXXXXXXXXXXXXXXXXXXXXXXXXXXXXXXXXXXXXXXXXXXXXXXXXXXXXXXXXXXXXXXXXXXXXXXXXXXXXXXXXXXXXXXXXXXXXXXXXXXXXXXXXXXXXXXXXXXXXXXXXXXXXXXXXXXXXXXXXXXXXXXXXXXXXXXXXXXXXXXXXXXXXXXXXXXXXXXXXXXXXXXXXXXXXXXXXXXXXXXXXXXXXXXXXXXXXXXXXXXXXXXXXXXXXXXXXXXXXXXXXXXXXXXXXXXXXXXXXXXXXXXXXXXXXXXXXXXXXXXXXXXXXXXXXXXXXXXXXXXXXXXXXXXXXXXXXXXXXXXXXXXXXXXXXXXXXXXXXXXXXXXXXXXXXXXXXXXXXXXXXXXXXXXXXXXXXXXXXXXXXXXXXXXXXXXXXXXXXXXXXXXXXXXXXXXXXXXXXXXXXXXXXXXXXXXXXXXXXXXXXXXXXXXXXXXXXXXXXXXXXXXXXXXXXXXXXXXXXXXXXXXXXXXXXXXXXXXXXXXXXXXXXXXXXXXXXXXXXXXXXXXXXXXXXXXXXXXXXXXXXXXXXXXXXXXXXXXXXXXXXXXXXXXXXXXXXXXXXXXXXXXXXXXXXXXXXXXXXXXXXXXXXXXXXXXXXXXXXXXXXXXXXXXXXXXXXXXXXXXXXXXXXXXXXXXXXXXXXXXXXXXXXXXXXXXXXXXXXXXXXXXXXXXXXXXXXXXXXXXXXXXXXXXXXXXXXXXXXXXXXXXXXXXXXXXXXXXXXXXXXXXXXXXXXXXXXXXXXXXXXXXXXXXXXXXXXXXXXXXXXXXXXXXXXXXXXXXXXXXXXXXXXXXXXXXXXXXXXXXXXXXXXXXXXXXXXXXXXXXXXXXXXXXXXXXXXXXXXXXXXXXXXXXXXXXXXXXXXXXXXXXXXXXXXXXXXXXXXXXXXXXXXXXXXXXXXXXXXXXXXXXXXXXXXXXXXXXXXXXXXXXXXXXXXXXXXXXXXXXXXXXXXXXXXXXXXXXXXXXXXXXXXXXXXXXXXXXXXXXXXXXXXXXXXXXXXXXXXXXXXXXXXXXXXXXXXXXXXXXXXXXXXXXXXXXXXXXXXXXXXXXXXXXXXXXXXXXXXXXXXXXXXXXXXXXXXXXXXXXXXXXXXXXXXXXXXXXXXXXXXXXXXXXXXXXXXXXXXXXXXXXXXXXXXXXXXXXXXXXXXXXXXXXXXXXXXXXXXXXXXXXXXXXXXXXXXXXXXXXXXXXXXXXXXXXXXXXXXXXXXXXXXXXXXXXXXXXXXXXXXXXXXXXXXXXXXXXXXXXXXXXXYNFKKVTVVPSSKDFTDIVLSKTQRKTPTVVHKHYKIGRIRQFYTRKIKFTQQTFHDKLTQIITDFPKLDDVHPFYADLMNILYDKDHYKLALGAINTSRHLIDNVAKDYVRLIKYADSLYRCKCLKKAALGRMVTIMRRQNQSLQYLEQVRQHLARLPSIDPNTRTLLICGFPNVGKSSFINKITRADVEVQPYAFTTKSLFVGHTDYKYLRWQVIDTPGILDHPLEERNTIEMQAITALAHIRAAVLYVMDISEQCGHSIEEQIKLFNSISPLFANKPLIIVLNKVDVIRPEELTEEGVMEVKQEACERLLAQRVNIKMNSKKCLHVAEPKTRDRERPPCIPKLERDIELEMGDDYILDLKKNYERYDKIPEIFEGKNIADYIDSXXXXXXXXXXXXXXXXXXXXXXXXXXXXXXXXXXXXXXXXXXXXXXXXXXXXXXXXXXXXXXXXXXXXXXXXXXXXXXXXXXXXXXXXXXXXXXXXXXXXXXXXXXXXXXXXXXXXXXXXXXXXXXXXXXXXXXXXXXXXXXXXXXXXXXXXXXXXXXXXXXXXXXXXXXXXXXXXXXXXXXXXXXXXXXXXXXXXXXXXXXXXXXXXXXXXXXXXXXXXXXXXXXXXXXXXXXXXXXXXXXXXXXXXXXXXXXXXXXXXXXXXXXXXXXXXXXXXXXXXXXXXXXXXXXXXXXXXXXXXXXXXXXXXXXXXXXXXXXXXXXXXXXXXXXXXXXXXXXXXXXXXXXXXXXXXXXXXXXXXXXXXXXXXXXXXXXXXXXXXXXXXXXXXXXXXXXXXXXXXXXXXXXXXXXXXXXXXXXXXXXXXXXXXXXXXXXXXXXXXXXXXXXXXXXXXXXXXXXXXXXXXXXXXXXXXXXXXXXXXXXXXXXXXXXXXXXXXXXXXXXXXXXXXXXXXXXXXXXXXXXXXXXXXXXXXXXXXXXXXXXXXXXXXXXXXXXXXXXXXXXXXXXXXXXXXXXXXXXXXXXXXXXXXXXXXXXXXXXXXXXXXXXXXXXXXXXXXXXXXXXXXXXXXXXXXXXXXXXXXXXXXXXXXXXXXXXXXXXXXXXXXXXXXXXXXXXXXXXXXXXXXXXXXXXXXXXXXXXXXXXXXXXXXXXXXXXXXXXXXXXXXXXXXXXXXXXXXXXXXXXXXXXXXXXXXXXXXXXXXXXXXXXXXXXXXXXXXXXXXXXXXXXXXXXXXXXXXXXXXXXXXXXXXXXXXXXXXXXXXXXXXXXXXXXXXXXXXXXXXXXXXXXXXXXXXXXXXXXXXXXXXXXXXXXXXXXXXXXXXXXXXXXXXXXXXXXXXXXXXXXXXXXXXXXXXXXXXXXXXXXXXXXXXXXXXXXXXXXXXXXXXXXXXXXXXXXXXXXXXXXXXXXXXXXXXXXXXXXXXXXXXXXXXXXXXXXXXXXXXXXXXXXXXXXXXXXXXXXXXXXXXXXXXXXXXXXXXXXXXXXXXXXXXXXXXXXXXXXXXXXXXXXXXXXXXXXXXXXXXXXXXXXXXXXXXXXXXXXXXXXXXXXXXXXXXXXXXXXXXXXXXXXXXXXXXXXXXXXXXXXXXXXXXXXXXXXXXXXXXXXXXXXXXXXXXXXXXXXXXXXXXXXXXXXXXXXXXXXXXXXXXXXXXXXXXXXXXXXXXXXXXXXXXXXXXXXXXXXXXXXXXXXXXXXXXXXXXXXXXXXXXXXXXXXXXXXXXXXXXXXXXXXXXXXXXXXXXXXXXXXXXXXXXXXXXXXXXXXXXXXXXXXXXXXXXXXXXXXXXXXXXXXXXXXXXXXXXXXXXXXXXXXXXXXXXXXXXXXXXXXXXXXXXXXXXXXXXXXXXXXXXXXXXXXXXXXXXXXXXXXXXXXXXXXMGRRPARCYRYCKNKPYPKSRFCRGVPDPKIRIFDLGRKKAKVDEFPLCIHLVSDEYEQLSSEALEAGRICANKYVVKHCGKESVHIRVRVHPFHVIRINKMLSCAGADRLQTGMRGAYGKPLGTVARVSIGQPIMSVRTKEQYRAQVIEALRRAKFKFPGRQKICVSKKWGFTKWSVADYEKMRSEGKLTPDGAYCKYWGNHGPLXXXXXXXXXXXXXXXXXXXXXXXXXXXXXXXXXXXXXXXXXXXXXXXXXXXXXXXXXXXXXXXXXXXXXXXXXXXXXXXXXXXXXXXXXXXXXXXXXXXXXXXXXXXXXXXXXXXXXXXXXXXXXXXXXXXXXXXXXXXXXXXXXXXXXXXXXXXXXXXXXXXXXXXXXXXXXXXXXXXXXXXXXXXXXXXXXXXXXXXXXXXXXXXXXXXXXXXXXXXXXXXXXXXXXXXXXXXXXXXXXXXXXXXXXXXXXXXXXXXXXXXXXXXXXXXXXXXXXXXXXXXXXXXXXXXXXXXXXXXXXXXXXXXXXXXXXXXXXXXXXXXXXXXXXXXXXXXXXXXXXXXXXXXXXXXXXXXXXXXXXXXXXXXXXXXXXXXXXXXXXXXXXXXXXXXXXXXXXXXXXXXXXXXXXXXXXXXXXXXXXXXXXXXXXXXXXXXXXXXXXXXXXXXXXXXXXXXXXXXXXXXXXXXXXXXXXXXXXXXXXXXXXXXXXXXXXXXXXXXXXXXXXXXXXXXXXXXXXXXXXXXXXXXXXXXXXXXXXXXXXXXXXXXXXXXXXXXXXXXXXXXXXXXXXXXXXXXXXXXXXXXXXXXXXXXXXXXXXXXXXXXXXXXXXXXXXXXXXXXXXXXXXXXXXXXXXXXXXXXXXXXXXXXXXXXXXXXXXXXXXXXXXXXXXXXXXXXXXXXXXXXXXXXXXXXXXXXXXXXXXXXXXXXXXXXXXXXXXXXXXXXXXXXXXXXXXXXXXXXXXXXXXXXXXXXXXXXXXXXXXXXXXXXXXXXXXXXXXXXXXXXXXXXXXXXXXXXXXXXXXXXXXXXXXXXXXXXXXXXXXXXXXXXXXXXXXXXXXXXXXXXXXXXXXXXXXXXXXXXXXXXXXXXXXXXXXXXXXXXXXXXXXXXXXXXXXXXXXXXXXXXXXXXXXXXXXXXXXXXXXXXXXXXXXXXXXXXXXXXXXXXXXXXXXXXXXXXXXXXXXXXXXXXXXXXXXXXXXXXXXXXXXXXXXXXXXXXXXXXXXXXXXXXXXXXXXXXXXXXXXXXXXXXXXXXXXXXXXXXXXXXXXXXXXXXXXXXXXXXXXXXXXXXXXXXXXXXXXXXXXXXXXXXXXXXXXXXXXXXXXXXXXXXXXXXXXXXXXXXXXXXXXXXXXXXXXXXXXXXXXXXXXXXXXXXXXXXXXXXXXXXXXXXXXXXXXXXXXXXXXXXXXXXXXXXXXXXXXXXXXXXXXXXXXXXXXXXXXXXXXXXXXXXXXXXXXXXXXXXXXXXXXXXXXXXXXXXXXXXXXXXXXXXXXXXXXXXXXXXXXXXXXXXXXXXXXXXXXXXXXXXXXXXXXXXXXXXXXXXXXXXXXXXXXXXXXXXXXXXXXXXXXXXXXXXXXXXXXXXXXXXXXXXXXXXXXXXXXXXXXXXXXXXXXXXXXXXXXXXXXXXXXXXXXXXXXXXXXXXXXXXXXXXXXXXXXXXXXXXXXXXXXXXXXXXXXXXXXXXXXXXXXXXXXXXXXXXXXXXXXXXXXXXXXXXXXXXXXXXXXXXXXXXXXXXXXXXXXXXXXXXXXXXXXXXXXXXXXXXXXXXXXXXXXXXXXXXXXXXXXXXXXXXXXXXXXXXXXXXXXXXXXXXXXXXXXXXXXXXXXXXXXXXXXXXXXXXXXXXXXXXXXXXXXXXXXXXXXXXXXXXXXXXXXXXXXXXXXXXXXXXXXXXXXXXXXXXXXXXXXXXXXXXXXXXXXXXXXXXXXXXXXXXXXXXXXXXXXXXXXXXXXXXXXXXXXXXXXXXXXXXXXXXXXXXXXXXXXXXXXXXXXXXXXXXXXXXXXXXXXXXXXXXXXXXXXXXXXXXXXXXXXXXXXXXXXXXXXXXXXXXXXXXXXXXXXXXXXXXXXXXXXXXXXXXXXX-----------------------------------------------------------------------------------------------------LEYITRFIAGLKQRYTQSNGRRPFGISCLIAGFDYDGPHLYQTDPSGTYHEWKANATGRSAKTVREYLEKNYVTQVVESDVATIKLAIRALLEVVQSGGKNLEIAIMXXXXXXXXXXXXXXXXXXXXXXXXXXXXXXXXXXXXXXXXXXXXXXXXXXXXXXXXXXXXXXXXXXXXXXXXXXXXXXXXXXXXXXXXXXXXXXXXXXXXXXXXXXXXXXXXXXXXXXXXXXXXXXXXXXXXXXXXXXXXXXXXXXXXXXXXXXXXXXXXXXXXXXXXXXXXXXXXXXXXXXXXXXXXXXXXXXXXXXXXXXXXXXXXXXXXXXXXXXXXXXXXXXXXXXXXXXXXXXXXXXXXXXXXXXXXXXXXXXXXXXXXXXXXXXXXXXXXXXXXXXXXXXXXXXXXXXXXXXXXXXXXXXXXXXXXXXXXXXXXXXXXXXXXXXXXXXXXXXXXXXXXXXXXXXXXXXXXXXXXXXXXXXXXXXXXXXXXXXXXXXXXXXXXXXXXXXXXXXXXXXXXXXXXXXXXXXXXXXXXXXXXXXXXXXXXXXXXXXXXXXXXXXXXXXXXXXXXXXXXXXXXXXXXXXXXXXXXXXXXXXXXXXXXXXXXXXXXXXXXXXXXXXXXXXXXXXXXXXXXXXXXXXXXXXXXXXXXXXXXXXXXXXXXXXXXXXXXXXXXXXXXXXXXXXXXXXXXXXXXXXXXXXXXXXXXXXXXXXXXXXXXXXXXXXXXXXXXXXXXXXXXXXXXXXXXXXXXXXXXXXXXXXXXXXXXXMASKDELACVYSALILQDDDVAITPEKINTILKAAKVEVEPYWPGLFAKALENIDVKSLITSLGS------------------------------------------------------------------------AKANNVPFMDVEALKKLNKNKKLVKKLAKKYDAFLASESLIKQIPRLLGPGLNKAGKFPALLSHNENMKIDEVKATIKFQMKKVLCLAVAVGHVKMPPEELGMNISLAINFLVSLLKKNWQNVRSLHIKSTMGAPQRLYXXXXXXXXXXXXXXXXXXXXXXXXXXXXXXXXXXXXXXXXXXXXXXXXXXXXXXXXXXXXXXXXXXXXXXXXXXXXXXXXXXXXXXXXXXXXXXXXXXXXXXXXXXXXXXXXXXXXXXXXXXXXXXXXXXXXXXXXXXXXXXXXXXXXXXXXXXXXXXXXXXMGAYKYTQEFYRKKQSDVMRYLLRIRCWQYRNLSVIHRAPRPSRPDKARRLGYRAKQGYVIYRIRIRRGGRKKPVPKGQTYGKPKNHGINQLKPTRNIQAVAEERVGRKCGSLRVLSSYWVAQDSTYKFYEVILVDPFHKAIRRDPKIHWICKSVHKHREMRGLTSAGRKSRGLGKGHRYSQTIGGSRYACWKRRNTLQLHR--MTRYATEPENATKSCKARGSNLRVHFKNTRETAQAIKKMPLRRAVRFLKNVVGKKECVPFRRFNGGVGRCAQAKQWGTQGRWPKKSANFLLQLLKNAESNAEYKGLEADHLVIEHIQVNRAPHMRRRTYRAHGRINPYMSSPCHIEVILTEKE--------------------------------------------NPRKITWTVLYRRKHKKGQEEEATKKRTRRTTKFQRAIVGATLNDILAKRNQKPEVRKAQREQAIRRKIRTSVQFRRPKTLSLPRQPKYPRKSVPTRNRLDQFSIIKHPLTTESAMKKIEDNNTLVFIVNLQANKPQIRTAVKKLYDIDVAKVNTLLRPDGQKKAYVRLAPDYDALDVASKIGIIXXXXXXXXXXXXXXXXXXXXXXXXXXXXXXXXXXXXXXXXXXXXXXXXXXXXXXXXXXXXXXXXXXXXXXXXXXXXXXXXXXXXXXXXXXXXXXXXXXXXXXXXXXXXXXXXXXXXXXXXXXXXXXXXXXXXXXXXXXXXXXXXXXXXXXXXXXXXXXXXXXXXXXXXXXXXXXXXXXXXXXXXXXXXXXXXXXXXXXXXXXXXXXXXXXXXXXXXXXXXXXXXXXXXXXXXXXXXXXXXXXXXXXXXXXXXXXXXXXXXXXXXXXXXXXXXXXXXXXXXXXXXXXXXXXXXXXXXXXXXXXXXXXXXXXXXXXXXXXXXXXXXXXXXXXXXXXXXXXXXXXXXXXXXXXXXXXXXXXXXXXXXXXXXXXXXXXXXXXXXXXXXXXXXXXXXXXXXXXXXXXXXXXXXXXXXXXXXXXXXXXXXXXXXXXXXXXXXXXXXXXXXXXXXXXXXXXXXXXXXXXXXXXXXXXXXXXXXXXXXXXXXXXXIVKKRVKKFIRHQSDRYVKLRSNWRKPKGIDNRVRRRFKGQYIMPNIGFGSSKKTRHVLPNGFRKFLVHNVRELEILMMQNRLYCAEIAHGVSSRKRKDIVERAQQLSIRITNNHARLRSE---KGHKLTRPSRTKGKHIKVIRDVVREVAGFAPYERRAMELLKVSKDKRALKFVKKRLGTHLRAKRKRDELSNVITQMRKXXXXXXXXXXXXXXXXXXXXXXXXXXXXXXXXXXXXXXXXXXXXXXXXXXXXXXXXXXXXXXXXXXXXXXXXXXXXXXXXXXXXXXXXXXXXXXXXXXXXXXXXXXXXXXXXXXXXXXXXXXXXXXXXXXXXDKKLWKKNYFVKLTQFLDEYPKCFIVGVDNVGSRQMQQIRISLRGCGAVLMGKNTMIRKAIRGHLEKNAALERLVTHIRGNVGFVFTKEDLGDVRDKIIANKVLAPAKAGALAPIDVIIPAQNTGLGPEKTSFFQALSIPTKISKGTIEIMSDVHLIKRDERVGASEATLLNMLNISPFTYGLKIQQVYDSGTVFEPAILDIKAEDLRSKFVIGVTNVAALCLQISYPSLASAPHSLANGFKNLLAIAVVTNFKEATMAKEYLKDPSKFVDPFTRKDWYDVKAPSTFTNRQIGKTLVNRTQGTRIASEGLKGRVFEVSLADLQNDEIAYRKFRLVAEEVQGRNVLTNFHGMDLTTDKLRSMVKKWQTLIEANVDVKTTDGYLLRLFCIGFTKKQAKKTCYAQHTQIRQIRKKMVETMTQEVASNDLKGVVNKLIPDSIGKDIEKKCQGIYPLHDVYIRKVKVLKKPKFDLGKLLELHGPEGYEPPVQQSVMLMPKKNRVLIYEYLFKEGVLVAKKDFHAPKHVPNLHVIKALQSLHSRGYVKEQFAWRHYYWYLTNEGIQYLREFLKLPPEIVPSTLK----------------------------KTPREAIEGSYIDKKCPFTGDISIRGRILTGIVQKMKMQKTIVIRRDYLHYVKKYNRFEKRHKNMSVHLSPCFRDVKVGDVVTVGECRPLSKTVRFNVLKVTKHRIRITLTSRNVRSLEKVCTDLIHGAKDKDLKVKGPVRMPTKVLRITTRKTPCGEGSKTWDHYQMRIHKRVIDLHSPSEIVKQITSISIEPGVEVEVTIADTIRTRKFMSNRLLRRKQMVIDVIHPGRSSVPKTEIREKLAKLYKTTPDMIFCFGFRTSFGGGKSTGFGLIYDTLDFAKKFEPKYRLARHGLYERKQ----------------VRDKLNNLVLFDKATYEKLLKEVPSYKLITPSVVSERLKIRGSLARKALDELLQKGVIKQVVKHHAQVIYTRTTRGPKKHLKRLNAPKSWILDKLSGAFAPRPSTGPHKMRESLPLILFLRDRLRYALNGSEVTKILMQRLVKVDGKVRTDNNYPAGFMDVITIEKTGEFFRLMYDVKGRFTIHRITAEEAKYKLCKVRKVQVGPKGIPFLVTHDARTIRYPDPNIKVNDTIQVDIASGKITDFIKFDSGNLCMITGGRNLGRVGTVTNRERHPGSFDIVHVKDSMGHSFATRLNNIFIIGKSTKPYISLPRGKGVKLSIAEERDRRMKLNISYPASGCQKLIEVDDERKLRAFYDKRMSAEVEADSLGDEWKGYMFRVTGGNDKQGFPMKQGVLTAGRVRLLLSKGHSCYRPRRTGERKRKSVRGCIVDANLSVLSLVIIKKGEQEIPGLTDSAVPRRLGPKRASKIRKLYNLSKEDDVRQYVVKKPLPLKEGKRFKAPKIQRLVTPLMLQRKRDEFETTISQALLELEISSDLKAQLRELKITGAKEKKAIIIFVPVYQLKPYQKIQTRLVRELEKKFSGKHVVFIAQRRILPKPTRKNKQKRPRSRTLTSVHDAILEDLVHPAEIVGKRIRIRLDGSRLIKVHLDKNQMTNIEHKTDTFAAVYKKLTGKEVTFEFMGISRDHWHKRRKTGGKKKPIRKKRKFELGRPAANTKLGPRRIHTVRTRGGNKKYRALRLDQGNFSWGSESCARKTRVIDVVYNASNNELVRTKTLVKNAIIVIDATPFRQWYEAHYALPLGRKKGAKLKRSKKTARKYKERQKHAKVEPQLEEQFMTGRVLACISSRPGQCGRADGYILEGKELEFYLRK-----XXXXXXXXXXXXXXXXXXXXXXXXXXXXXXXXXXXXXXXXXXXXXXXXXXXXXXXXXXXXXXXXXXXXXXXXXXXXXXXXXXXXXXXXXXXXXXXXXXXXXXXXXXXXXXXXXXXXXXXXXXXXXXXXXXXXXXXXXXXXXXXXXXXXXXXXXXXXXXXXXXXXXXXXXXXXXXXXXXXXXXXXXXXXXXXXXXXXXXXXXXXXXXXXXXXXXXXXXXXXXXXXXXXXXXXXXXXXXXXXXXXXXXXXXXXXXXXXXXXXXXXXXXXXXXXXXXXXXXXXXXXXXXXXXXXXXXXXXXXXXXXXXXXXXXXXXXXXXXXXXXXXXXXXXXXXXXXXXXXXXXXXXXXXXXXXXXXXXXXXXXXXXXXXXXXXXXXXXXXXXXXXXXXXXXXXXXXXXXXXXXXXXXXXXXXXXXXXXXXXXXXXXXXXXXXXXXXXXXXXXXXXXXXXXXXXXXXXXXXXXXXXXXXXXXXXXXXXXXXXXXXXXXXXXXXXXXXXXXXXXXXXXXXXXXXXXXXXXXXXXXXXXXXXXXXXXXXXXXXXXXXXXXXXXXXXXXXXXXXXXXXXXXXXXXXXXXXXXXXXXXXXXXXXXXXXXXXXXXXXXXXXXXXXXXXXXXXXXXXXXXXXXXXXXXXXXXXXXXXXXXXXXXXXXXXXXXXXXXXXXXXXXXXXXXXXXXXXXXXXXXXXXXXXXXXXXXXXXXXXXXXXXXXXXXXXXXXXXXXXXXXXXXXXXXXXXXXXXXXXXXXXXXXXXXXXXXXXXXXXXXXXXXXXXXXXXXXXXXXXXXXXXXXXXXXXXXXXXXXXXXPAGDPEKGKKLFVQRCAQCHTVESGGKHKTGPNLHGLIGRKTGQASGFNYTDANKSKGITWNKDTLFEYLENPKKYIPGTKMVFAGLKKPQERADLIAYLEVSTXXXXXXXXXXXXXXXXXXXXXXXXXXXXXXXXXXXXXXXXXXXXXXXXXXXXXXXXXXXXXXXXXXXXXXXXXXXXXXXXXXXXXXXXXXXXXXXXXXXXXXXXXXXXXXXXXXXXXXXXXXXXXXXXXXXXXXXXXXXXXXXXXXXXXXXXXXXXXXXXXXXXXXXXXXXXXXXXXXXXXXXXXXXXXXXXXXXXXXXXXXXXXXXXXXXXXXXXXXXXXXXXXXXXXXXXXXXXXXXXXXXXXXXXXXXXXXXXXXXXXXXXXXXXXXXXXXXXXXXXXXXXXXXXXXXXXXXXXXXXXXXXXXXXXXXXXXXXXXXXXXXXXXXXXXXXXXXXXXXXXXXXXXXXXXXXXXXXXXXXXXXXXXXXXXXXXXXXXXXXXXXXXXXXXXXXXXXXXXXXXXXXXXXXXXXXXXXXXXXX----------------------------------------------------------------------------------------------------------------------------------------------------------------------------------------------------------------MIDSVTPSISD---------------------------------------------------------------------------------------------FRDMGYNVSMMADSTSRWAEALREISGRLAEMPADSGYPAYLGARLASFYERAGRVKCLGNPEREGSVSIVGAVSPPGGDFSDPVTSATEGIC------------------------------------------------------------------------------------------------------C------------------------------------------------------------------------------------XXXXXXXXXXXXXXXXXXXXXXXXXXXXXXXXXXXXXXXXXXXXXXXXXXXXXXXXXXXXXXXXXXXXXXXXXXXXXXXXXXXXXXXXXXXXXXXXXXXXXXXXXXXXXXXXXXXXXXXXXXXXXXXXXXXXXXXXXXXXXXXXXXXXXXXXXXXXXXXXXXXXXXXXXXXXXXXXXXXXXXXXXXXXXXXXXXXXXXXXXXXXXXXXXXXXXXXXXXXXXXXXXXXXXXXXXXXXXXXXXXXXXXXXXXXXXXXXXXXXXXXXXXXXXXXXXXXXXXXXXXXXXXXXXXXXXXXXXXXXXXXXXXXXXXXXXXXXXXXXXXXXXXXXXXXXXXXXXXXXXXXXXXXXXXXXXXXXXXXXXXXXXXXXXXXXXXXXXXXXXXXXXXXXXXXXXXXXXXXXXXXXXXXXXXXXXXXXXXXXXXXXXXXXXXXXXXXXXXXXXXXXXX
Glomeridesmus_sp               XXXXXXXXXXXXXXXXXXXXXXXXXXXXXXXXXXXXXXXXXXXXXXXXXXXXXXXXXXXXXXXXXXXXXXXXXXXXXXXXXXXXXXXXXXXXXXXXXXXXXXXXXXXXXXXXXXXXXXXXXXXXXXXXXXXXXXXXXXXXXXXXXXXXXXXXXXXXXXXXXXXXXXXXXXXXXXXXXXXXXXXXXXXXXXXXXXXXXXXXXXXXXXXXXXXXXXXXXXXXXXXXXXXXXXXXXXXXXXXXXXXXXXXXXXXXXXXXXXXXXXXXXXXXXXXXXXXXXXXXXXXXXXXXXXXXXXXXXXXXXXXXXXXXXXXXXXXXXXXXXXXXXXXXXXXXXXXXXXXXXXXXXXXXXXXXXXXXXXXXXXXXXXXXXXXXXXXXXXXXXXXXXXXXXXXXXXXXXXXXXXXXXXXXXXXXXXXXXXXXXXXXXXXXXXXXXXXXXXXXXXXXXXXXXXXXXXXXXXXXXXXXXXXXXXXXXXXXXXXXXXXXXXXXXXXXXXXXXXXXXXXXXXXXXXXXXXKEKPKQIRNSNMTAAKAVADAVRTSLGPRGMDKMIQAGNGDVTITNDGATILKQMQVTHPAARMLVELSKAQDIEAGDGTTTVVVMAGSLLDAAQKLLAKGIHPTTISDSFQIAAEKAVEILIATPVDLSDRESLLKSASTSLNSKVVSQHSSQLAPIAVDAVLKNVDLRDIKIIKKLGGTLEDTELIEGLVFNQKGPTKMEKAKIGLIQFCLSPPKTDMEHNVIVSDYTQMDRVLREERTYILNLVKQIKKAGCNVLLIQKSILRDAVNDLALHFLAKMKIMVVKDIEREDIEFVCKSLACRPIASVDHFLPEHLGSADLVEEGNSKYVKVTGVSNPTVTILVRGSNKLVLEEADRSLHDALCVIRCLVKKRALIAGGGAPETHISLRLSQYSQTLKGMEAYCIRAFADALEIISSTLA---------------------------------------------------------------------FDEYGRPFIIIRDQDRKKRLTGVDALKAHILAARSVANTLKSSLGPKGLDKLMVSPDGDVTITNDGATILKMMDVEHQIAKLMVQLSQSQDDEIGDGTTGVVVLAGSLLEQAELLLDRGIHPIRIADGFELAARHAIEHLDRIGDSFSIDPNNEPLIQTAMTTLGSKIVNRCHRKMAEIAVQAVLSVADLERKDVDFELIKVEGKVGGKLEDSMLVKGVVVDKDFSHPQMPKVLKDVTLAILTCPFEPPKPKTKHKLDITSVEDYKKLRKYELEKFNEIVQQVKDAGANLVICQWGFDDEANHLLLQKNLPAVRWVGGPEIELIAIATGGRIVPRFQELSKDKLGYAG---------------------------------------------------------------------------------------------------------------------------------------------------------------------------------AKDVKFGADVRSQMLKGVDVLADAVAVTMGPKGRNVIIEQSWGSPKITKDGVTVAKAIELKDKYQNIGAKLVQDVANNTNEEAGDGTTTATVLARSIAKEGFDRISRGANPIEIRRGVMNAVETVVDQLKKMSKQVTTPEEIAQVATISANGDGEVLSSAMKKVGKDGVITVKDGKTLHDELEVIEGMKFDRGYISPYFINTTKGGKVEYQDALLLLSEKKISAIQEIIPALELANRKPLVILAEDIDGEALTTLVLNRLKVGLQVVAVKAPGFGDNRKNTLNDIAIATGGIVFGDEATLIKLEEISLKDFGRVGEVLVTKDDTLLLKGKGDKKDISRRVDAIRDEIESSNSEYEKEKLNERLARLASGVAVLKIGGSSEVEVNEKKDRVNDALNATRAAVEEGIVPGGGVALLRCLPALANLKADNDDHKMGIDIIRKTLSVPCLQIASNAGVDASVVVHTVGYDALNNQYVNMMSQGIIDPTKVVRTALVDAASVASLLTTAEAVVCELPK----------------------------------------------------------------------------------------------------------------------------------------------------------------------------FPNVGKSSFINKITRADVEVQPYAFTTKSLYVGHTDYKYLRWQVVDTPGILDHPLEERNTIEMQAITALAHLRAAVLYVMDISEQCGHDMAAQAQLFKSIK--------------------------------------------------------------------------------------------------------------------------------------------------------------------------------------------------------------------------------------------------------------------------DPTVQWSEDRFNECRDKLLPYLKKCGFNPKTDLTFIPCSGLTGAFLCPWYKGPAFIPYIDMPTINRVVEGPLRMPIIDRYKDMGTVVLGKVEMGFAKKGQQLLLMPNRTNVEIVQMWSDDDEVNMVQSGENVKIKLKGVEEEDVSQGFVLCDSNQPCRTGRIFDAQVVILEHKSIICAGY--------------------------------------------------------------------EIRGLMDKKKNIRNMSVIAHVDHGKSTLTDSLVGKAGIIAQAKAGETRFTDTRKDEQERCITIKSTAISMYFEVAEKDLLFIGFLINLIDSPGHVDFSSEVTAALRVTDGALVVVDCVSGVCVQTETVLRQAIAERIKPVLFMNKMDRALLELQLEQEDLFQTFQRIVENINVIIATYGDGPMGDVKVDPSKGSVGFGSGLHGWAFTLKQFSEIYAEKFKIKLMRRLWGDNFYNPKTKKWRSFCMFVLDPIFKFDAIMNKKEETSKLLEKLLKGEDKDKDGKNLLKVVMRQWLPAGEALLQMISIHLPSPVTAQRYRMEILYEGPHDDEAAKNCDANGPLMMYISKMVPTSDKGRFYAFGRVFGGVVGTGQKVRIMGPNYTPGKKEDLYEKAIQRTILMMGRYTEAIEDVPCGNICGLVGVDQYLIKTGTISTFKDAHNMRVMKFSVSPVVRVAVEPKNPSELPKLVEGLKRLAKSDPMVQCIIEESGEHIIAGAGELHLEICLKDLEEDHACIPIKVSDPVVSYRETVSEESDIMCLSKSPNKHNRLYMKATPMPEGLPEDIDKGVTSRDDFKARARLLGERYDYDVTEARKIWCFGPDGTGPNILVDCTKGIQYLNEIKDSVVAGFQWATKEGVLAEENLRGVRFNIHDVTLHADAIHRGGGQIIPTARRCLYASLLTAKPRIMEPVYLCEIQCPENAVGGIYGVLNRKRGHVFEESQVTGTPMFVVKAYLPVNESFGFTADLRSNTGGQAFPQCVFDHWQILPGDPRPFVVVQDARKRKGLKEGIPALDQYLDKLDAGASATFPQQCSSLRKNGFVMLKARPCKIVEMSTSKTGKHGHAKVHLVGLDIFTNKKYEDICPSTHNMDVPFVKREDYQLCAISDDGYLSLMDNGDIRDDLKLPDGTVLKACGEECVIAXXXXXXXXXXXXXXXXXXXXXXXXXXXXXXXXXXXXXXXXXXXXXXXXXXXXXXXXXXXXXXXXXXXXXXXXXXXXXXXXXXXXXXXXXXXXXXXXXXXXXXXXXXXXXXXXMGRRPARCYRYCKNKPYPKSRFCRGVPDPKIRIFDLGRKKAKVDEFQLCVHLVSDEYEQLSSEALEAGRICANKYLVKHCGKDAFHIRMRLHPFHVIRINKMLSCAGADRLQTGMRGAFGKPQGTVARVHIGQPIMSVRAKENHKAQVIEALRRAKFKFPGRQKIYVSKMWGFTKWSVAQYEEMRSDGRLIPDGAYCQYRGPHGPLFDEMDLKEPLLRGIYAYGFEKPSAIQQRAIMPCIKGLDVIAQAQSGTGKTATFAISILQQIDPALRDCQALILAPTRELAQQIQKVVIALGDYMNAQCHACIGGTNVREDVRKLEHVVVGTPGRVYDMINRKALRTNQIRIFVLDEADEMLSRGFKDQIYDVFKNLQVILLSATMPADVLEVTKRFMRDPVRILVKKEELTLEGIKQFYISVEKEEWKLDTLCDLYETLTITQAVIFCNTRRKVDWLTEHMTKKDFTVSAMHGDMDQGQRDVIMREFRSGSSRVLITTDLLARGIDVQQVSLVINYDLPNNRENYIHRIGRGGRFGRKGVAINFVTEEDRRTLRDIEQFYNTHIEEMPMNVADLIXXXXXXXXXXXXXXXXXXXXXXXXXXXXXXXXXXXXXXXXXXXXXXXXXXXXXXXXXXXXXXXXXXXXXXXXXXXXXXXXXXXXXXXXXXXXXXXXXXXXXXXXXXXXXXXXXXXXXXXXXXXXXXXXXXXXXXXXXXXXXXXXXXXXXXXXXXXXXXXXXXXXXXXXXXXXXXXXXXXXXXXXXXXXXXXXXXXXXXXXXXXXXXXXXXXXXXXXXXXXXXXXXXXXXXXXXXXXXXXXXXXXXXXXXXXXXXXXXXXXXXXXXXXXXXXXXXXXXXXXXXXXXXXXXXXXXXXXXXXXXXXXXXXXXXXXXXXXXXXXXXXXXXXXXXXXXXXXXXXXXXXXXXXXXXXXXXXXXXXXXXXXXXXXXXXXXXXXXXXXXXXXXXXXXXXXXXXXXXXXXXXXXXXXXXXXXXXXXXXXXXXXXXXXXXXXXXXXXXXXXXXXXXXXXXXXXXXXXXXXXXXXXXXXXXXXXXXXXXXXXXXXXXXXXXXXXXXXXXXXXXXXXXXXXXXXXXXXXXXXXXXXXXXXXXXXXXXXXXXXXXXXXXXXXXXXXXXXXXXXXXXXXXXX------------------------------------------------------------------------------MEKPNIKWTDVAGLEGAKEALKEAVILPIKFPHLFTGKRTPWKGILLYGPPGTGKSYLAKAVATEANNSTFFAVSSSDLMSKWLGESEKLVKNLFQMAREQKPSIIFIDEIDSLCSSRSDNESESARRIKTEFLIQMQGVGIDNEGILVLGATNIPWVLDAAIRRRFEKRIYIPLPEEHGRTDMFKLHLGTPNQLLGKKTQGYSGADISILVRDA------------------------------------------------------------------------------------------------XXXXXXXXXXXXXXXXXXXXXXXXXXXXXXXXXXXXXXXXXXXXXXXXXXXXXXXXXXXXXXXXXXXXXXXXXXXXXXXXXXXXXXXXXXXXXXXXXXXXXXXXXXXXXXXXXXXXXXXXXXXXXXXXXXXXXXXXXXXXXXXXXXXXXXXXXXXXXXXXXX---------------------------------------------------HSVFLNVSKGQVAKKEDLMKAFGDDQTEICKQILDKGELQISEKERNAQLDSTFKDIATTVADKCVNPDTKRPYPVSIIEKAMKDAHYSVKPNRSAKFELYQSS----MFLTRSEYDRGVNTFSPEGRLFQVEYAIEAIKLGSTAIGIQTSEGVVLAVEKRITSPLMEPTTIEKIVEIDYHLGCAVSGLMADSRTMVDRARVEAQNHWFTYNEKMSVESVAQSVSNLAIQFGDSDSDAMSRPFGVAILFAEKGPQLFHMDPSGTLIQYDAKAIGSGSEGAQQNLQETYHKSLTLQEALKSALTILKQVMEEKLNATNVEYDRAITVFSPDGHLFQVEYAQEAVKKGSTAVGVRGNDIVVLGVEKKSVAKLQEERTVRKICLLDDHVVMAFAGLTADARILINRARIECQSHKLTVEDPVTLEYITRYIAGLKQRYTQSNGRRPFGISCLIAGFDYDGPHLYQTDPSGTYHEWKANATGRSAKTVREYLEKNYTAELVESDEETIKLAVKALLEVVQSGGKNIELAVM----------------------------------------------------------------------------------------------------------------------------------------DKHYGFQLYQSDPSGNYGGWKATCIGYNSAAAISMLKQEYKEGETTLKDALSLAVKVMSKTLDTTKLTSEKLEMATLTRYSFSLTTFSPSGKLVQIEYALAAVAAGAPSVGIKVRNGVVLATEKKHKSILSDENSVHKVEMIANHIGMVYSGMGPDYRLLVRRARKLAQQYFMVYQEPIPTSQLVQQVATIMQEYTQSGGVRPFGVSLLIAGYRSYLFQCDPSGAYFAWKATAMGKNYLNGKTFLEKRY-----------------------------------------------XXXXXXXXXXXXXXXXXXXXXXXXXXXXXXXXXXXXXXXXXXXXXXXXXXXXXXXXXXXXXXXXXXXXXXXXXXXXXXXXXXXXXXXXXXXXXXXXXXXXXXXXXXXXXXXXXXXXXXXXXXXXXXXXXXXXXXXXXXXXXXXXXXXXXXXXXXXXXXXXXXXXXXXXXXXXXXXXXXXXXXXXXXXXXXXXXXXXXXXXXXXXXXXXXXXXXXXXXXXXXMSNTDEFACVYSALILLDDEVAITGEKISTILKAAKVDVEPYWPGLFAKALEGVDVKNMITNVGSSKVSRDTLYECVNGVLQNSKKRSFVETVELQIALKNYDPQKDKRFSGTIKLRHIPKPKFKVCILGDQQHCDEAKASNIPFMDVEALKKLNKSKKLVKKLAKKYDAFLASESLIKQIPRLLGPGLNKAGKFPALLAHGESMKIDEVKATIKFQMKKVLCLAVAVGHVKMSPDELVQNVSLSINFLVSLLKKNWQNVRSLHVKSTMGPPQRLYMGPKFDPTEIKTVCLRVVGGEVGATSSLAPKIGPLGLSPKKVGDDIAKATADWKGLKITVKLIIQNRQATIEVVPSAASLIVKALKEPPRDRKKVKNIKHDGNITFEEVLNIARVMRRSMARKLSGTVKEILGTAHSVGCSIDGSAPHDLINKINSGEIEVPMGAYKYVQELYRKKQSDVMRFLLRVRCWQYRQLTAVHRIPRPTRPDKARRLGYRAKQGFVIYRVRIRRGGRKKPVPKGQTYGKPKNHNVNERKPSRSHQALAEGRVGKRCGALRVLNSYWVAQDSTYKFFEVVLVDPSHKVIRQDPSIQWLCNPVHKHRELRGLTAAGRKSRGLGKGHRFSQTIGGSRTACWKRRTILNLHRKR----------------ARGSNLRVHFKNTRETAQAIKKMPLRRAVRYLKNVMEQKECVPFRRFNGGVGRCAQAKQWGTQGRWPKKSAEFLLQLLKNAESNADCKGLETDNLVIEHIQVNRAPHMRRRTYRAHGRINPYMSSPCHIEVILVEKEMKVELCAYSGYKIYPGHGKRIIKTDGKTFIFLNAKCERAHKMRRNPRKITWTVLYRRKHKKGIEEETTKKRTRRAAKFTRAVVGATLQDIMAKRNQKPEIRKAQREQAIRRKIRTSAHFHRPKTLSLPRHPKFPRKSVPHRNRMDQFSIIKHPLTTESAMKKIEDNNTLVFIVHLKANKHQIKSAVKKLYDIKVEKVNTLIRPDGQKKAYVRLASDFDALDVANKIGIISHRKFSAPRHGSMAFYPKKRSRRHRGKVKAFPKDNVNKPVHLTAFMGYKAGMTHIVREVDRPGSKVNKKEIVEAVTIVETPPIVVVGIVGYIQTPTGLRSLKTVWAEHLSEECRRRFYKNYKSKKKAFTKYAKKWQDPVGKQEIEKDLKKIKRYCKVVRVICHTQMRLMRKRQKKAHILEIQVNGGTIAQKVDWARAHFEKPIPISRVFSKDEMIDCIGVTKGKGYKGVTSRWHTKKLPRKTHKGLRKVACIGAWHPSRVQFTVARAGQKGYHHRTEINKKIYRIGRGKLVKNSGSTSYDATEKTITPMGGFPHYGEVNCDFIMLKGCIMGPRKRNITLRKSLLTHTKRSALEKIELKFIDTSSKFGHGRFQTPAEKKSAINEVVTREYTVNLHKRLHGIGFKKRAPRAIKEILKFAEKQMGTPDVRVDTRLNKHVWSKGIRNVPYRVRVRLSRRRNEDEDSPHKLYTLVTWIPVTT--------------------RHQSDRYRKLRPNWRKPKGIDNRVRRRFKGQYLMPNIGYGSARNTKHLLPSGFKKFLVHNVKELEILLMQNHKFCAEIAHGVSARKRKELVERANQLSIRVTNAYARLRTEENEKGHKTTRPSRRKGKHTKFIRDVVREVCGFAPYERRAMELLKVSKDKRALKFIKKRLGTHLRGKRKRDELSNVLIQMRKXXXXXXXXXXXXXXXXXXXXXXXXXXXXXXXXXXXXXXXXXXXXXXXXXXXXXXXXXXXXXXXXXXXXXXXXXXXXXXXXXXXXXXXXXXXXXXXXXXXXXXXXXXXXXXXXXXXXXXXXXXXXXXXXXXXXDKATWKSNYFLKLVQLLDEYPKCFVVGVDNVGSKQMQQIRISLRGFGIVLMGKNTMIRKAIRGHMEKNPALERLLPYIKGNVGFVFTKEDLVDVREKILANKVQAPARAGALAPIDVIIPAQNTGLGPEKTAFFQALSIATKISKGTIEIISDVHLIKRDERVGASEATLLNMLNVSPFTYGLKIQQVYDSGTVFEPSVLDITSEDIRDKFMLGVRNVASVCLEIFYPTMVSAPHSLINGFKNLLAVAVETDFKEAEMAKEYLKDPSKFVDPFTRKDWYDVKAPSMFNIRQVGKTLVNRTQGTRIASDGLKGRVFEVSLADLQNDEISFRKFRLIAEEVNGKNVLTNFHGMDLTTDKLRSMVKKWQTLIESNVDVKTTDGYLLRLFCIGFTKKQVKKTCYAQHNQIRIIRKKMVEIMTKEVSSNDLKEVVNKLIPDSIGKDIEKACQGIYPLHDVFIRKVKVLKKPKFDIGKLLELHGPEGYEPPVQESV------------------------------KHVPNLHVIKALQSLKSSGYVTEQFAWRHFYWYLTNEGIQYLRDFLHLPPEIVPATLKERAFQRQPTVFLNRKKNLRYVRNVGLGFKTPREALVGTYIDKKCPFTGNISIRGRILTGVVQKMKMQRTIVIRRDYLHYVKKYNRFEKRHKNMSVHLSPCFRDVKVGDIATVGECRPLSKTVRFNVLKITRHRIRITLTSRNVRSLEKVCADLIKGAKDKSLKVKGPVRMPTKVLRITTRKTPCGEGSKTWDRFQMRIYKRVIDLHSPSEIVKQITSISIEPGVDIEVTIADTIRTRKYMTNRLLCRKQMVVDVLHPGRSSVSKVEIRDKLARMYKTTPDLCFVFGFKTCFGGGKSSGFALIYDTLDFAKKFEPKYRLQRHGLYERKQRKERKNRQKKVRGTKKXXXXXXXXXXXXXXXXXXXXXXXXXXXXXXXXXXXXXXXXXXXXXXXXXXXXXXXXXXXXXXXXXXXXXXXXXXRGPKKHLKRLNAPKAWILDKLTGTFAPRPSTGPHKLRESLPLIILLRNRLKYALTGSEVTKIVMQRLIKVDGKVRTDNNFPAGFMDVVSIDKTAEHFRLLYDVKGRFVVHRITAEEAQYKLCKVKRIQVGPKGIPFLTTNDGRTIRYPDPLIKVNDSVRIDISTGKIMDYIKFESGNLCTITGGRNLGRVGVVSHRERHPGSFDIVHVKDAQGHAFATRLNNVFIIGKGPTPYISLPKGNGIKLTIAEERDRRMKLNISYPVTGCQKLVEVDDEKKLRVFYDKRMGAEVDADSLGDEWKGYIVRVSGGNDKQGFPMKQGVLTAGRVRLLLSKGHSCYRPRRTGERKRKSVRGCIVDANLSVIALVIVKKGAQEIPGLTDNTVPRRLGPKRASKIRKLFNLSKEDDVRQYVIRRPIAVKEGKKTKAPKIQRLITPVMLQRKRTEVESQIAQALLDLEMNSDLKSQLRELHITAAKEKKAVIIFVPVPQLKAYQKIQMRLVRELEKKFSGKHVVFIAQRRILPKPTRKNKQKRPRSRTLSAVHDAILEDLVFPAEIVGKRIRIKLDGTRLIKVHLDKNQMTNIEHKIDTFGSVYKKLTGKDVNFEFMGISRDHWHKRRKTGGKRKPIRKKRKFELGRPAANTKLGAKRIHTVRTRGGNKKYRALRLDQGNFAWGSECCARKTRIIDVVYNASNNELVRTKTLVKNAIVVIDATPFRQWYEAHYLLPLGRKKGSK-KRSAKTNKKYKLRQKTSKVEPALEEQFMTGRVLACVASRPGQCGRSDGYVLEGKELEFYIRKIKSRGXXXXXXXXXXXXXXXXXXXXXXXXXXXXXXXXXXXXXXXXXXXXXXXXXXXXXXXXXXXXXXXXXXXXXXXXXXXXXXXXXXXXXXXXXXXXXXXXXXXXXXXXXXXXXXXXXXXXXXXXXXXXXXXXXXXXXXXXXXXXXXXXXXXXXXXXXXXXXXXXXXXXXXXXXXXXXXXXXXXXXXXXXXXXXXXXXXXXXXXXXXXXXXXXXXXXXXXXXXXXXXXXXXXXXXXXXXXXXXXXXXXXXXXXXXXXXXXXXXXXXXXXXXXXXXXXXXXXXXXXXXXXXXXXXXXXXXXXXXXXXXXXXXXXXXXXXXXXXXXXXXXXXXXXXXXXXXXXXXXXXXXXXXXXXXXXX---------------------------------------------------LPKQSFLMRKHFFNNEETGYFKTQNPMTDPAVMTDMLKGNVTNVLPMIMIGGWINWTFSGFVTTKVPFPLTLRFKPMLQRGIELSSLNASWVSSASWYFLNVFGLRSIYALVLGENNAADQARVMQEQMSGAAMAMPPDPMGDRYNIHSQLEHLQSKYIGTGHADTSKYEWMVNQHRDSFASYMGHYDMLNYFAIAENETKARVRFNMMEKMLQPCGPPPEKPDE--------------------------------------------------LASDVHVVRGDFDEIHPEQKVVTVGQFRIGLCHGHQVVPWGDPESLSLVQRQLDVDILISGHTHKFEAYEHGNKFYINPGSATGAYSALPSFVLMDIQSTTVVTYVYQLIGDKLQVDG-----XXXXXXXXXXXXXXXXXXXXXXXXXXXXXXXXXXXXXXXXXXXXXXXXXXXXXXXXXXXXXXXXXXXXXXXXXXXXXXXXXXXXXXXXXXXXXXXXXXXXXXXXXXXXXXXXXXXXXXXXXXXXXXXXXXXXXXXXXXXXXXXXXXXXXXXXXXXXXXXXXXXXXXXXXXXXXXXXXDPFADAIKQEGLVHIRIQQRNGRKTLTTVQGISNDYDKKKIVRACKKEFACNGTVVEHPEYGEVLQLQGDQRENICQFLTKVGIAKPEQLKVHGF-----------------------------------LQAMDNSHVSLVSLNLRSDGFDKFRCDRNLSLGMNLTSMAKVFKCASNDDIITIKAQDDTVTFVFESANQEKVSDYEMKLMNLDTEHLGIPETEYSCTVKMPANEFQRICRDLSQIGDTVQIACTKQGIKFSASGDLGTGNIKLVQT----------------------------------------------------------------------------------------------------------------------------------------------------------------------------------------------------------------------------------------------------------------------------------------------VQGGTTAIPGAFGCGKTVISQSLSKYSNSDVIIYVGCGERGNEMSEVLRDFPELTTEIDGHVESIMKRTALVANTSNMPVAAREASIYTGITLSEYFRDMGYNVSMMADSTSRWAEALREISGRLAEMPADSGYPAYLGARLASFYERAGRVKCLGNPEREGSVSIVGAVSPPGGDFSDPVTSATLGIVQVFWGLDKKLAQRKHFPSINWLISYSK----------------------------------------------------------------------------------------------------------------------------------------------------------------FPSRMAQTIMKARLKGAQTGHSLLKKKADALQMRFRQILGKIIETKTLMGEVMKEAVFSLAEAKFTTGDFNHVVLQNVTKAQIKTRSRKDNVAGVNLPIFESYQDGDTYELAGLARGGQQLSKLKKNYQKAIQLLVDLASLQTSFITLDEVIKITNRRVNAIEHVIIPRIERTLAYITTELDEREREEFYRLKKIQQKMPQNEHIELHRKRHGFRLDYHEKKRKKEARAPHDKSRKAMKLRGLKAKMYNKQRHAEKIQMKKTLKMHEEKKTKAVPAYLLDREQSRAKVLSNMIKQKRKEKAGKWDVPLPKVRAQGETEVFRVVKTGKSRRKAWKRMVTKACFVGEGFTRKPPKYERFIRPMGLRFKKAHVTHPELKATFYLPIINVKMNPGSTMYTKLGVITKGTVIEVNVSELGLVTQGGKVVWGKYAQVTNNPENDGCINAVLL
Euperipatoides_kanagrensis     XXXXXXXXXXXXXXXXXXXXXXXXXXXXXXXXXXXXXXXXXXXXXXXXXXXXXXXXXXXXXXXXXXXXXXXXXXXXXXXXXXXXXXXXXXXXXXXXXXXXXXXXXXXXXXXXXXXXXXXXXXXXXXXXXXXXXXXXXXXXXXXXXXXXXXXXXXXXXXXXXXXXXXXXXXXXXXXXXXXXXXXXXXXXXXXXXXXXXXXXXXXXXXXXXXXXXXXXXXXXXXXXXXXXXXXXXXXXXXXXXXXXXXXXXXXXXXXXXXXXXXXXXXXXXXXXXXXXXXXXXXXXXXXXXXXXXXXXXXXXXXXXXXXXXXXXXXXXXXXXXXXXXXXXXXXXXXXXXXXXXXXXXXXXXXXXXXXXXXXXXXXXXXXXXXXXXXXXXXXXXXXXXXXXXXXXXXXXXXXXXXXXXXXXXXXXXXXXXXXXXXXXXXXXXXXXXXXXXXXXXXXXXXXXXXXXXXXXXXXXXXXXXXXXXXXXXXXXXXXXXXXXXXXXXXXXXXXXXXXXXXXXXXXXXXXXXXXXXXXXXXXXXXXXXXXXXXXXXXXXXXXXXXXXXXXXXXXXXXXXXXXXXXXXXXXXXXXXXXXXXXXXXXXXXXXXXXXXXXXXXXXXXXXXXXXXXXXXXXXXXXXXXXXXXXXXXXXXXXXXXXXXXXXXXXXXXXXXXXXXXXXXXXXXXXXXXXXXXXXXXXXXXXXXXXXXXXXXXXXXXXXXXXXXXXXXXXXXXXXXXXXXXXXXXXXXXXXXXXXXXXXXXXXXXXXXXXXXXXXXXXXXXXXXXXXXXXXXXXXXXXXXXXXXXXXXXXXXXXXXXXXXXXXXXXXXXXXXXXXXXXXXXXXXXXXXXXXXXXXXXXXXXXXXXXXXXXXXXXXXXXXXXXXXXXXXXXXXXXXXXXXXXXXXXXXXXXXXXXXXXXXXXXXXXXXXXXXXXXXXXXXXXXXXXXXXXXXXXXXXXXXXXXXXXXXXXXXXXXXXXXXXXXXXXXXXXXXXXXXXXXXXXXXXXXXXXXXXXXXXXXXXXXXXXXXXXXXXXXXXXXXXXXXXXXXXXXXXXXXXXXXXXXXXXXXXXXXXXXXXXXXXXXXXXXXXXXXXXXXXXXXXXXXXXXXXXXXXXXXXXXXXXXXXXXXXXXXXXXXXXXXXXXXXXXXXXXXXXXXXXXXXXXXXXXXXXXXXXXXXXXXXXXXXXXXXXXXXXXXXXXXXXXXXXXXXXXXXXXXXXXXXXXXXXXXXXXXXXXXXXXXXXXXXXXXXXXXXXXXXXXXXXXXXXXXXXXXXXXXXXXXXXXXXXXXXXXXXXXXXXXXXXXXXXXXXXXXXXXXXXXXXXXXXXXXXXXXXXXXXXXXXXXXXXXXXXXXXXXXXXXXXXXXXXXXXXXXXXXXXXXXXXXXXXXXXXXXXXXXXXXXXXXXXXXXXXXXXXXXXXXXXXXXXXXXXXXXXXXXXXXXXXXXXXXXXXXXXXXXXXXXXXXXXXXXXXXXXXXXXXXXXXXXXXXXXXXXXXXXXXXXXXXXXXXXXXXXXXXXXXXXXXXXXXXXXXXXXXXXXXXXXXXXXXXXXXXXXXXXXXXXXXXXXXXXXXXXXXXXXXXXXXXXXXXXXXXXXXXXXXXXXXXXXXXXXXXXXXXXXXXXXXXXXXXXXXXXXXXXXXXXXXXXXXXXXXXXXXXXXXXXXXXXXXXXXXXXXXXXXXXXXXXXXXXXXXXXXXXXXXXXXXXXXXXXXXXXXXXXXXXXXXXXXXXXXXXXXXXXXXXXXXXXXXXXXXXXXXXXXXXXXXXXXXXXXXXXXXXXXXXXXXXXXXXXXXXXXXXXXXXXXXXXXXXXXXXXXXXXXXXXXXXXXXXXXXXXXXXXXXXXXXXXXXXXXXXXXXXXXXXXXXXXXXXXXXXXXXXXXXXXXXXXXXXXXXXXXXXXXXXXXXXXXXXXXXXXXXXXXXXXXXXXXXXXXXXXXXXXXXXXXXXXXXXXXXXXXXXXXXXXXXXXXXXXXXXXXXXXXXXXXXXXXXXXXXXXXXXXXXXXXXXXXXXXXXXXXXXXXXXXXXXXXXXXXXXXXXXXXXXXXXXXXXXXXXXXXXXXXXXXXXXXXXXXXXXXXXXXXXXXXXXXXXXXXXXXXXXXXXXXXXXXXXXXXXXXXXXXXXXXXXXXXXXXXXXXXXXXXXXXXXXXXXXXXXXXXXXXXXXXXXXXXXXXXXXXXXXXXXXXXXXXXXXXXXXXXXXXXXXXXXXXXXXXXXXXXXXXXXXXXXXXXXXXXXXXXXXXXXXXXXXXXXXXXXXXXXXXXXXXXXXXXXXXXXXXXXXXXXXXXXXXXXXXXXXXXXXXXXXXXXXXXXXXXXXXXXXXXXXXXXXXXXXXXXXXXXXXXXXXXXXXXXXXXXXXXXXXXXXXXXXXXXXXXXXXXXXXXXXXXXXXXXXXXXXXXXXXXXXXXXXXXXXXXXXXXXXXXXXXXXXXXXXXXXXXXXXXXXXXXXXXXXXXXXXXXXXXXXXXXXXXXXXXXXXXXXXXXXXXXXXXXXXXXXXXXXXXXXXXXXXXXXXXXXXXXXXXXXXXXXXXXXXXXXXXXXXXXXXXXXXXXXXXXXXXXXXXXXXXXXXXXXXXXXXXXXXXXXXXXXXXXXXXXXXXXXXXXXXXXXXXXXXXXXXXXXXXXXXXXXXXXXXXXXXXXXXXXXXXXXXXXXXXXXXXXXXXXXXXXXXXXXXXXXXXXXXXXXXXXXXXXXXXXXXXXXXXXXXXXXXXXXXXXXXXXXXXXXXXXXXXXXXXXXXXXXXXXXXXXXXXXXXXXXXXXXXXXXXXXXXXXXXXXXXXXXXXXXXXXXXXXXXXXXXXXXXXXXXXXXXXXXXXXXXXXXXXXXXXXXXXXXXXXXXXXXXXXXXXXXXXXXXXXXXXXXXXXXXXXXXXXXXXXXXXXXXXXXXXXXXXXXXXXXXXXXXXXXXXXXXXXXXXXXXXXXXXXXXXXXXXXXXXXXXXXXXXXXXXXXXXXXXXXXXXXXXXXXXXXXXXXXXXXXXXXXXXXXXXXXXXXXXXXXXXXXXXXXXXXXXXXXXXXXXXXXXXXXXXXXXXXXXXXXXXXXXXXXXXXXXXXXXXXXXXXXXXXXXXXXXXXXXXXXXXXXXXXXXXXXXXXXXXXXXXXXXXXXXXXXXXXXXXXXXXXXXXXXXXXXXXXXXXXXXXXXXXXXXXXXXXXXXXXXXXXXXXXXXXXXXXXXXXXXXXXXXXXXXXXXXXXXXXXXXXXXXXXXXXXXXXXXXXXXXXXXXXXXXXXXXXXXXXXXXXXXXXXXXXXXXXXXXXXXXXXXXXXXXXXXXXXXXXXXXXXXXXXXXXXXXXXXXXXXXXXXXXXXXXXXXXXXXXXXXXXXXXXXXXXXXXXXXXXXXXXXXXXXXXXXXXXXXXXXXXXXXXXXXXXXXXXXXXXXXXXXXXXXXXXXXXXXXXXXXXXXXXXXXXXXXXXXXXXXXXXXXXXXXXXXXXXXXXXXXXXXXXXXXXXXXXXXXXXXXXXXXXXXXXXXXXXXXXXXXXXXXXXXXXXXXXXXXXXXXXXXXXXXXXXXXXXXXXXXXXXXXXXXXXXXXXXXXXXXXXXXXXXXXXXXXXXXXXXXXXXXXXXXXXXXXXXXXXXXXXXXXXXXXXXXXXXXXXXXXXXXXXXXXXXXXXXXXXXXXXXXXXXXXXXXXXXXXXXXXXXXXXXXXXXXXDSGASATYPQQCSALRKNGFVMLKARPCKIVEMSTSKTGKHGHAKVHLVGLDIFSGKKYEDICPSTHNMDVPFVKRED-QLCAIG-DGFLSLME----REDMKLPEGTVLRACGEEAVIAXXXXXXXXXXXXXXXXXXXXXXXXXXXXXXXXXXXXXXXXXXXXXXXXXXXXXXXXXXXXXXXXXXXXXXXXXXXXXXXXXXXXXXXXXXXXXXXXXXXXXXXXXXXXXXXXXXXXXXXXXXXXXXXXXXXXXXXXXXXXXXXXXXXXXXXXXXXXXXXXXXXXXXXXXXXXXXXXXXXXXXXXXXXXXXXXXXXXXXXXXXXXXXXXXXXXXXXXXXXXXXXXXXXXXXXXXXXXXXXXXXXXXXXXXXXXXXXXXXXXXXXXXXXXXXXXXXXXXXXXXXXXXXXXXXXXXXXXXXXXXXXXXXXXXXXXXXXXXXXXXXXXXXXXXXXXXXXXXXXXXXXXXXXXXXXXXXXXXXXXXXXXXXXXXXXXXXXXXXXXXXXXXXXXXXXXXXXXXXXXXXXXXXXXXXXXXXXXXXXXXXXXXXXXXXXXXXXXXXXXXXXXXXXXXXXXXXXXXXXXXXXXXXXXXXXXXXXXXXXXXXXXXXXXXXXXXXXXXXXXXXXXXXXXXXXXXXXXXXXXXXXXXXXXXXXXXXXXXXXXXXXXXXXXXXXXXXXXXXXXXXXXXXXXXXXXXXXXXXXXXXXXXXXXXXXXXXXXXXXXXXXXXXXXXXXXXXXXXXXXXXXXXXXXXXXXXXXXXXXXXXXXXXXXXXXXXXXXXXXXXXXXXXXXXXXXXXXXXXXXXXXXXXXXXXXXXXXXXXXXXXXXXXXXXXXXXXXXXXXXXXXXXXXXXXXXXXXXXXXXXXXXXXXXXXXXXXXXXXXXXXXXXXXXXXXXXXXXXXXXXXXXXXXXXXXXXXXXXXXXXXXXXXXXXXXXXXXXXXXXXXXXXXXXXXXXXXXXXXXXXXXXXXXXXXXXXXXXXXXXXXXXXXXXXXXXXXXXXXXXXXXXXXXXXXXXXXXXXXXXXXXXXXXXXXXXXXXXXXXXXXXXXXXXXXXXXXXXXXXXXXXXXXXXXXXXXXXXXXXXXXXXXXXXXXXXXXXXXXXXXXXXXXXXXXXXXXXXXXXXXXXXXXXXXXXXXXXXXXXXXXXXXXXXXXXXXXXXXXXXXXXXXXXXXXXXXXXXXXXXXXXXXXXXXXXXXXXXXXXXXXXXXXXXXXXXXXXXXXXXXXXXXXXXXXXXXXXXXXXXXXXXXXXXXXXXXXXXXXXXXXXXXXXXXXXXXXXXXXXXXXXXXXXXXXXXXXXXXXXXXXXXXXXXXXXXXXXXXXXXXXXXXXXXXXXXXXXXXXXXXXXXXXXXXXXXXXXXXXXXXXXXXXXXXXXXXXXXXXXXXXXXXXXXXXXXXXXXXXXXXXXXXXXXXXXXXXXXXXXXXXXXXXXXXXXXXXXXXXXXXXXXXXXXXXXXXXXXXXXXXXXXXXXXXXXXXXXXXXXXXXXXXXXXXXXXXXXXXXXXXXXXXXXXXXXXXXXXXXXXXXXXXXXXXXXXXXXXXXXXXXXXXXXXXXXXXXXXXXXXXXXXXXXXXXXXXXXXXXXXXXXXXXXXXXXXXXXXXXXXXXXXXXXXXXXXXXXXXXXXXXXXXXXXXXXXXXXXXXXXXXXXXXXXXXXXXXXXXXXXXXXXXXXXXXXXXXXXXXXXXXXXXXXXXXXXXXXXXXXXXXXXXXXXXXXXXXXXXXXXXXXXXXXXXXXXXXXXXXXXXXXXXXXXXXXXXXXXXXXXXXXXXXXXXXXXXXXXXXXXXXXXXXXXXXXXXXXXXXXXXXXXXXXXXXXXXXXXXXXXXXXXXXXXXXXXXXXXXXXXXXXXXXXXXXXXXXXXXXXXXXXXXXXXXXXXXXXXXXXXXXXXXXXXXXXXXXXXXXXXXXXXXXXXXXXXXXXXXXXXXXXXXXXXXXXXXXXXXXXXXXXXXXXXXXXXXXXXXXXXXXXXXXXXXXXXXXXXXXXXXXXXXXXXXXXXXXXXXXXXXXXXXXXXXXXXXXXXXXXXXXXXXXXXXXXXXXXXXXXXXXXXXXXXXXXXXXXXXXXXXXXXXXXXXXXXXXXXXXXXXXXXXXXXXXXXXXXXXXXXXXXXXXXXXXXXXXXXXXXXXXXXXXXXXXXXXXXXXXXXXXXXXXXXXXXXXXXXXXXXXXXXXXXXXXXXXXXXXXXXXXXXXXXXXXXXXXXXXXXXXXXXXXXXXXXXXXXXXXXXXXXXXXXXXXXXXXXXXXXXXXXXXXXXXXXXXXXXXXXXXXXXXXXXXXXXXXXXXXXXXXXXXXXXXXXXXXXXXXXXXXXXXXXXXXXXXXXXXXXXXXXXXXXXXXXXXXXXXXXXXXXXXXXXXXXXXXXXXXXXXXXXXXXXXXXXXXXXXXXXXXXXXXXXXXXXXXXXXXXXXXXXXXXXXXXXXXXXXXXXXXXXXXXXXXXXXXXXXXXXXXXXXXXXXXXXXXXXXXXXXXXXXXXXXXXXXXXXXXXXXXXXXXXXXXXXXXXXXXXXXXXXXXXXXXXXXXXXXXXXXXXXXXXXXXXXXXXXXXXXXXXXXXXXXXXXXXXXXXXXXXXXXXXXXXXXXXXXXXXXXXXXXXXXXXXXXXXXXXXXXXXXXXXXXXXXXXXXXXXXXXXXXXXXXXXXXXXXXXXXXXXXXXXXXXXXXXXXXXXXXXXXXXXXXXXXXXXXXXXXXXXXXXXXXXXXXXXXXXXXXXXXXXXXXXXXXXXXXXXXXXXXXXXXXXXXXXXXXXXXXXXXXXXXXXXXXXXXXXXXXXXXXXXXXXXXXXXXXXXXXXXXXXXXXXXXXXXXXXXXXXXXXXXXXXXXXXXXXXXXXXXXXXXXXXXXXXXXXXXXXXXXXXXXXXXXXXXXXXXXXXXXXXXXXXXXXXXXXXXXXXXXXXXXXXXXXXXXXXXXXXXXXXXXXXXXXXXXXXXXXXXXXXXXXXXXXXXXXXXXXXXXXXXXXXXXXXXXXXXXXXXXXXXXXXXXXXXXXXXXXXXXXXXXXXXXXXXXXXXXXXXXXXXXXXXXXXXXXXXXXXXXXXXXXXXXXXXXXXXXXXXXXXXXXXXXXXXXXXXXXXXXXXXXXXXXXXXXXXXXXXXXXXXXXXXXXXXXXXXXXXXXXXXXXXXXXXXXXXXXXXXXXXXXXXXXXXXXXXXXXXXXXXXXXXXXXMASKDELACVYGALILQDDDVAITGEKIATILKAANVDVEPFWPGLFARALEG-NIKSLI-NIGSSKISRDTLYETINTVLQHSKKRKFLESVELQVALKNYDPQKDKRFSGTVKLKYIPRPKFKACVLGDQQHCDEAKANDVNFKDVEELKKLNKNKKLVKKLAKQYDAFLASESLIKQIPRLLGPGLNKAGKFPTLLTHNESMKIDEVKATIKFQMKKVLCLAVAVGHVHLTPDELAVNLSMAINFLVSLLKKNWQNVRSLTVKSTMGPPQRLYMPPKFDPNEIKVVCLRAIGGEVGATASLAPKIGPLGLSPKKVGDDIAKATQDWKGLKITVKLVIQNRQATISVVPSAAALIIKALKEPPRDRKKQKNIKHSGNVTFDEIISTARQMRRSMARRLEGTVKEILGTAQSVGCTVEGCNPHDVIDKINNGELEVPMGAYKYMQELYRKKQSDVMHFLLRVRCWQYRQLTRIHRAPRPSRPDKARKLGYRAKQGYVIYRVRVRRGTRKKPVPKGCTYGKPKNQGINQLKFKRNLQSVAEERVGRRCKALRVLNSYWVAQDSTFKFFEVILVDPFHKTIRRNPDMQWVTKPVHKHREMRGLTSAGRKSRGLGKGHRYTQTIGGSRKAAWKRRNTIQLHRKRMTRYSMDPENATKSCKARGSNLRVHFKNTRETAQAIKKMHLRRAVRYLKNVVDKKEIVPFRRFNGGVGRKAQCKNWKTQGRWPKKSAEFLLQLLKNAESNAEYKGLDTDHLVIEHIQVNRAPHMRRRTYRAHGRINPYMSSPCHIEVILTEKEMKIDLCSFSGYKIYPGHGKRMVKSDGKVCAFLNAKCEAAYRLKRNPRNVNWTVLYRRKHKKGQQEEMTKKRTRRTTKFQRAIVGATLTDILAKRNQKPEVRKAQREQAIRXXXXXXXXXXXXXXXXXXXXXXXXXXXXXXXXXXXXXXXXXXXXXXXXXXXXXXXXXXXXXXXXXXXXXXXXXXXXXXXXXXXXXXXXXXXXXXXXXXXXXXXXXXXXXXXXXXXXXXXXXXXXXXXXXXXXXXXXXXXXXXXXXXXXXXXXXXXXXXXXXXXXXXXXXXXXXXXXXXXXXXXXXXXXXXXXXXXXXXXXXXXXXXXXXXXXXXXXXXXXXXXXXXXXXXXXXXXXXXXXXXXXXXXXXXXXXXXXXXXXXXXXXXXXXXXXXXXXXXXXXXXXXXXXXXXXXXXXXXXXXXXXXXXXXXXXXXXXXXXXXXXXXXXXXXXXXXXXXXXXXXXXXXXXXXXXXXXXXXXXXXXXXXXXXXXXXXXXXXXXXXXXXXXXXXXXXXXXXXXXXXXXXXXXXXXXXXXXXXXXXXXXXXXXXXXXXXXXXXXXXXXXXXXXXXXXXXXXXXXXXXXXXXXXXXXXXXXXXXXXXXXXXXXXXXXXXXXXKSTINEVVTREYTIHLHKRIHGIGFKKRAPRAIKEIKKFAEKQMGTPDVRVDTRLNKHVWSKGVRNVPFRIRVRLSRRRNEDEDSIHKLYTLVTFVPVTTFKGLQTINVDIIKKRTKNFIRHQSDRYARLKTNWRRPNGIDSRVRRRFTGQYLMPNIGYGSAKKTKHMLPNGFRKVLVHNVRELEVLMMHNTHFCAEISHGVSSRTRKDIVERAQQLAIRVTNPNARLRSEENQKGYRVTRHARAKGKHSKFIRDIVREVTGFAPYERRCMELLKVSKDKRALKFLKKRLGAHKRAKRKRDEMQQVLAHMRKMTKGTSSFGKRHNKTHTLCRRCGRSSYHIQKSRCSQCGYPKSRLRHYNWSIKAQRRKTTGTGRMRHLKKVHRRFRNGFREGMAS---FRIKRKLAKKQNQNRPIPQWIRMRTGNTIRYNAKRRHWRRTKLKLXXXXXXXXXXXXXXXXXXXXXXXXXXXXXXXXXXXXXXXXXXXXXXXXXXXXXXXXXXXXXXXXXXXXXXXXXXXXXXXXXXXXXXXXXXXXXXXXXXXXXXXXXXXXXXXXXXXXXXXXXXXXXXXXXXXXXXXXXXXXXXXXXXXXXXXXXXXXXXXXXXXXXXXXXXXXXXXXXXXXXXXXXXXXXXXXXXXXXXXXXXXXXXXXXXXXXXXXXXXXXXXXXXXXXXXXXXXXXXXXXXXXXXXXXXXXXXXXXXXXXXXXXXXXXIDPFTRKDWYDVKAPSMFNIRQIGKTLVNRTQGTKIASEGLKGRVFEVSLADLQNDEVTFRKFRLIAEEVQGRSVLTNFHGMDLTTDKLRSMVKKWQTLIEANVDVKTTDGYLLRLFCIGFTKKQVKKTCYAQHQQVRQIRKKMVEIMQREVSSKDLKEVVNKLIPDSIGKDIEKACQGIYPLYDVFIRKVKVLKKPKFDLGKLLELHGPEGYEPPVLDRVMLMPKKNRTSIYEYLFKEGVLVAKKDFHAPKHVPNLHVIKAMQSLKSRGYVKEQFAWMHFYWYVTNEGIQFLRDYLHLPPEIVPATLKXXXXXXXXXXXXXXXXXXXXXXXXXXXXXXXXXXXXXXXXXXXXXXXXXXXXXXXXXXXXXXXXXXXXXXXXXXXXXXXXXXXXXXXXXXXXXXXXXXXXXXXXXXXXXXXXXXXXXXXXXXXXXXXXXXXXXXXXXXXXXXXXXXXXXXXXXXXXXXXXXXXXXXXXXXXXXXXXXXXXXXXXXXXXXXXXXXXXXXXXXXXXXXXXXXXXXXXXXXXXXXXXXXXXXXXXXXXXXXXXXXXXXXXXXXXXXXXXXXXXXXXXXXXXXXXXXXXXXXXXXXXXXXXXXXXXXXXXXXXXXXXXXXXXXXXXXXXXXXXXXXXXXXXXXXXXXXXXXXXXXXXXXXXXXXXXXXXXXXXXXXXXXXXXXXXXXXXXXXXXXXXXXXXXXXXXXXXXXXXXXXXXXXXXXXXXXXXXXXRGPKKHLKRLNAPKHWMLDKLTGVFAPKPSSGPHKMRECLPLNIFLRNRLKYALTGDEAKKIVKQRLVKVDGKVRTDPTYPSGFMDVITIDKIGEHFRLIYDVKGRFAIHRITTEEAKYKLCKVKRVQTGPKGIPFLTTHDARTIRYPDPLIKVNDSVQVTIATGKIIDYIKFDTGNLCMITGGHNLGRVGIVTHRERHPGSFDIVHVKDAMGHEFATRLNNVFIIGKANKPYVSLPRGKGVKLTIAEERDKRXXXXXXXXXXXXXXXXXXXXXXXXXXXXXXXXXXXXXXXXXXXXXXXXXXXXXXXXXXXXXXXXXXXXXXXXXXXXXXXXXXXXXXXXXXXXXXXXXXXXXXXXXXXXXXXXXXXXXXXXXXXXXXXXXXXXXXXXXXXXXXXXXXXXXXXXXXXXXXXXXXXXXXXXXXXXXXXXXXXXXXXXXXXXXXXXXXXXXXXXXXXXXXXXXXXXXXXXXXXXXXXXXXXXXXXXXXXXXXXXXXXXXXXXXXXXXXXXXXXXXXXXXXXXXXXXXXXXXXXXXXXXXXXXXXXXXXXXXXXXXXXXXXXXXXXXXXXXXXXXXXXXXXXXXXXXXXXXXXXXXXXXXXXXXXXMGISRDSWHKRRATGGKRKPWRKKRKFELGRPAANTKIGPRRVHVVRCRGGNKKYRALRLDTGNFSWGSECCTRKTRIIDVVYNASNNELVRTKTLVKNCIVQIDATPFRQWYEGHYAVPLGRKKGAKLKRSKKCLKKYKERQKIAKVETALEELFMTGRVYACISSRPGQCGRADGYILEGKELEFYLRKIKAKKXXXXXXXXXXXXXXXXXXXXXXXXXXXXXXXXXXXXXXXXXXXXXXXXXXXXXXXXXXXXXXXXXXXXXXXXXXXXXXXXXXXXXXXXXXXXXXXXXXXXXXXXXXXXXXXXXXXXXXXXXXXXXXXXXXXXXXXXXXXXXXXXXXXXXXXXXXXXXXXXXXXXXXXXXXXXXXXXXXXXXXXXXXXXXXXXXXXXXXXXXXXXXXXXXXXXXXXXXXXXXXXXXXXXXXXXXXXXXXXXXXXXXXXXXXXXXXXXXXXXXXXXXXXXXXXXXXXXXXXXXXXXXXXXXXXXXXXXXXXXXXXXXXXXXXXXXXXXXXXXXXXXXXXXXXXXXXXXXXXXXXXXXXXXXXXXXXXXXXXXXXXXXXXXXXXXXXXXXXXXXXXXXXXXXXXXXXXXXXXXXXXXXXXXXXXXXXXXXXXXXXXXXXXXXXXXXXXXXXXXXXXXXXXXXXXXXXXXXXXXXXXXXXXXXXXXXXXXXXXXXXXXXXXXXXXXXXXXXXXXXXXXXXXXXXXXXXXXXXXXXXXXXXXXXXXXXXXXXXXXXXXXMGDRYNIHSQLEHLQSKYIGTGHADTTKFEWLVNQHRDSYASYMGHFDMLNYFALAENETKARIRFNLMEKMLQPCGPPPEKPEDXXXXXXXXXXXXXXXXXXXXXXXXXXXXXXXXXXXXXXXXXXXXXXXXXXXXXXXXXXXXXXXXXXXXXXXXXXXXXXXXXXXXXXXXXXXXXXXXXXXXXXXXXXXXXXXXXXXXXXXXXXXXXXXXXXXXXXXXXXXXXXXXXXXXXXXXXXXXXXXXXXXXXXXXXXXXXXXXXXXXXXXXXXXXXXXXXXXXXXXXXXXXXXXXXXXXXXXXXXXXXXXXXXXXXXXXXXXXXXXXXXXXXXXXXXXXXXXXXXXXXXXXXXXXXXXXXXXXXXXXXXXXXXXXXXXXXXXXXXXXXXXXXXXXXXXXXXXXXXXXXXXXXXXXXXXXXXXXXXXXXXXXXXXXXXDPFADAVKQEGLIHIRIQQRNGRKTLTTVQGISDDYDKKKIVKACKKEFACNGTVVEHPEYGEVIQLQGDQRNNICQFLTKIGIAKPEQLKVHGFXXXXXXXXXXXXXXXXXXXXXXXXXXXXXXXXXXXXXXXXXXXXXXXXXXXXXXXXXXXXXXXXXXXXXXXXXXXXXXXXXXXXXXXXXXXXXXXXXXXXXXXXXXXXXXXXXXXXXXXXXXXXXXXXXXXXXXXXXXXXXXXXXXXXXXXXXXXXXXXXXXXXXXXXXXXXXXXXXXXXXXXXXXXXXXXXXXXXXXXXXXXXXXXXXXXXXXXXXXXXXXXXXXXXXXXXXXXXXXXXXXXXXXXXXXXXXXXXXXXXXXXXXXXXXXXXXXXXXXXXXXXXXXXXXXXXXXXXXXXXXXXXXXXXXXXXXXXXXXXXXXXXXXXXXXXXXXXXXXXXXXXXXXXXXXXXXXXXXXXXXXXXXXXXXXXXXXXXXXXXXXXXXXXXXXXXXXXXXXXXXXXXXXXXXXXXXXXXXXXXXXXXXXXXXXXXXXXXXXXXXXXXXXXXXXXXXXXXXXXXXXXXXXXXXXXXXXXXXXXXXXXXXXXXXXXXXXXXXXXXXXXXXXXXXXXXXXXXXXXXXXXXXXXXXXXXXXXXXXXXXXXXXXXXXXXXXXXXXXXXXXXXXXXXXXXXXXXXXXXXXXXXXXXXXXXXXXXXXXXXXXXXXXXXXXXXXXXXXXXXXXXXXXXXXXXXXXXXXXXXXXXXXXXXXXXXXXXXXXXXXXXXXXXXXXXXXXXXXXXXXXXXXXXXXXXXXXXXXXXXXXXXXXXXXXXXXXXXXXXXXXXXXXXXXXXXXXXXXXXXXXXXXXXXXXXXXXXXXXXXXXXXXXXXXXXXXXXXXXXXXXXXXXXXXXXXXXXXXXXXXXXXXXXXXXXXXXXXXXXXXXXXXXXXXXXXXXXXXXXXXXXXXXXXXXXXXXXXXXXXXXXXXXXXXXXXXXXXXXXXXXXXXXXXXXXXXXXXXXXXXXXXXXXXXXXXXXXXXXXXXXXXXXXXXXXXXXXXXXXXXXXXXXXXXXXXXXXXXXXXXXXXXXXXXXXXXXXXXXXXXXXXXXXXXXXXXXXXXXXXXXXXXXXXXXXXXXXXXXXXXXXXXXXXXXXXXXXXXXXXXXXXXXXXXXXXXXXXXXXXXXXXXXXXXXXXXXXXXXXXXXXXXXXXXXXXXXXXXXXXXXXXXXXXXXXXXXXXXXXXXXXXXXXXXXXXXXXXXXXXXXXXXXXXXXXXXXXXXXXXXXXXXXXXXXXXXXXXXXXXXXXXXXXXXXXXXXXXXXXXXXXXXXXXXXXXXXXXXXXXXXXXXXXXXXXXXXXXXXXXXXXXXXXXXXXXXXXXXXXXXXXXXXXXXXXXXXXXXXXXXXXXXXXXXX
Capitella_telata               RTTGESVRTQNVMAAASIANIVKSSLGPVGLDKMLVDDVGDVTITNDGATILKLLEVEHPAAKVLVELAQLQDQEVGDGTTSVVIIAAELLKNADELVKCKIHPTSIISGYRLACKEACKYIQENMTIKVDELCRDSLISAAKTSMSSKIIGSDMDFFSTMVVDAAQAVKDGKGGFRYPVKAVNVLKAHGASSRESLLIHGYALNCTVASQAMVKKVTGAKIACLDFSLQKAKMKLGVQLLIDDPTQLEAMRKRESDITKERIQKILATGVNVVLTTGGIDDLCLKYFVEAGAMAVRRCKKADLKRIAKATGGQLVGTLANLEGDETFDASMLGQAEEVVQERICDDELLLIKRSAASIILRGANDFMVDEMERSIHDALCVVKRVMESKSVVPGGGAVEAALSIYLENFATSLSSREQLAIAEFARSLLTIPKQLAVNAAQDSTELVAKLRAYHNTSQTHKDLKWVGLDLVEGIVRDSKKAGVFEPAISKIKSLKFATEAAITILRIDDMIKLKEKPTQIRFSNITAAKAVADAIRTSLGPRGMDKMIQSSNGDVTITNDGATILKQMQLLHPAAKMLVELSKAQDVEAGDGTTTVTVIAGSLLDAAQKLLAKGIHPTSISDSFQKAAAKSVEILMGTPLELSDRESLLKSASTSLNSKVVSQYSNILAPLCVDAVLNNVNLTDIKIVKKLGGTVEDTELIEGLLFDNKGPSKIEKAKIGLIQFCISPPKTDMENQVVVSDYEQMDRVLREERQYILNIVKQIKKTGCNVLLIQKSILRDAVNDLALHFLAKMKIMVIKDIEREDIEFVCKSLGCRPAASLDHFSADILGSADLVEEGESKVTKVTGIANGTVSVLVRGSNKLVLEEADRSIHDALCVIRCLVKKRALIAGGGAPEIELSLRLSEFAHTLSGMEQYCFRAFADAMEIIPFTLAENAGLNPIATVTELRNKHAQGMKTAGINVRKGAITNILEENVVQPLLVSTSAVHLAAETVRSILKIDDIFDEFGRPFLILRDQENQTRLTGLDAQKSHILAAKAVASTLRTSLGPKGLDKMMVGSDGDVTITNDGATILQQMDVDHQIAKLLVQLSKSQDDEIGDGTTGVVVLAGALLEQAEQLLDRGIHPIRVADGYEMAAQAAVNELDRIADSFPVDLENEPLIRTAMTTLSSKIINKCHRQMAEIAVNAILAVADLERKDVDFELIKVEGKVGGQMEETLLVKGVIVDKDFSHPQMPREVKDAKMAILTCPFEPPKPKTKHKLDVTSVEDYKKLRQYEQEKFEEMVQQVKDTGANLVICQWGFDDEANHLLLQRELPAVRWVGGPEIELIAIATGGRIVPRFSELTAEKLGRAGVVKELSFGTTKDKMLVIEDCHNSRAVTIFIRGGNKMIIEEAKRSIHDALCVIRNLVKDHRIVYGGGAAEIACSVAVGQEADKISTLEQYAMRAFSEALESIPLALAENSGLAPIQTVAEVKSRQVLEKNPSLGIDCLNKGTNDMKAQHVIETLLSKKQQIMLATQVVKMILKIDDIRAKDIKFGAEARAEMLKGVDLLADTVAVTMGPKGRNVIIEQSWGSPKITKDGVTVAKSIDLKDKLQNIGAKLVQDVANNTNEEAGDGTTCATILARAFAKEGFEKISKGANPIEVRRGVMQAVEIVVNELRRMSKPVTTPEEIAQVATISANGDGNLISDAMKKVGKDGTMTVKDGKTLNDELEIIEGMRFDRGYISPYFINTTKGAKCEFQDSLVLFCEKKISSVQSIIPALELANRKPLVIIAEDIDGEALSTLVLNRLKVGLQIVAVKAPGFGDNRKNTLRDMAVSTGGIVFGDEGNMYQLEDVQLQDFGVVGEVTVTKDDTLMMRGKGTQEEIEKRMESIRDDMEATSSEYEKEKLAERLAKMSNGVAVIKVGGSSEVEVSEKKDRYTDALNATRAAVEEGIVPGGGVALIRCQAALDAVKGENSDVQTGMDIVKKSMRIPLYTISSNAGIDAQDVVTKVGYDARNGKFVNMIEAGIIDPTKVIRTALVDAAGVSSLLTTAEAVVTEIPKYNFKKITVVPTAKDFVDIVLSKTQRKTPTVIHKQYAIGRIRQFYLRKIKFAQQSFHDKLTEILTDFPKLDDVHPFYADLMNVLYDKDHYKLALGQINTARHLVDNVAKDYKRLLKYADSLYRCKQLKKAALGRMCTIMKRQGQSLSYLEQVRQHLSRLPSIDPNTRTLLITGFPNVGKSSFINKVTRADVEVQPYAFTTKSLFVGHMDYRYLRWQVVDTPGILDHSLEERNTIEMQAITALAHLRSAVLYIMDLSEQCGHNITQQVELFNNIKPLFANKPLIVVVNKIDVKKVDELTEEGIAAVKTQACDKLLAQRVESKLQGRKRLHLAMPAARDKSRPPCIPKLERDIEVEQGDDYFLDLKKNYEKYDVIPEIWEGHNIADFVDPKDHLNIVFIGHVDAGKSTIGGHIM-LTGMVEKRTLEKYEREAKEKNRESWYLSWALDTNLEERDKGKTVEVGRAYFETESKHFTILDAPGHKSFVPNMINGA-QADVAVLVISARRGEFETGFERGGQTREHAMLVKTAGVKHL--VVNKMDDPTVEWDESRYEEIKEKLTPYLKKCGFNPKQDI-YLPVSGLTG---CPWYSGVSLIQYLELAPVGRMTEGPVRMPVVDRYRDMGTIVLGKIESGTISKGQVLTMMPNKFSVEVMQLWSDEEDAEQCFPGANVKLKLKNVEEEDVSGGFVLC---SPNCTGRLFDAQVVILEHKSIICAGYSAVMHIH---EEVSIKTLRCTVDKRTGE--KSKQPFIKQDQIAIVRLEICLETFK-FPQMGRFTLRDEEIREHMDKKKNIRNMSVIAHVDHGKSTLTDSLVSKAGIIASAKAGETRFTDTRKDEQERCITIKSTAISLFYELPEKDLCHISFLINLIDSPGHVDFSSEVTAALRVTDGALVVVDCASGVCVQTETVLRQAIAERIRPVLFMNKFDKALGTLKLSSEDLYQTFCRIVENVNVIIATYGEGPMGEIMVDPAKGTVGFGSGLHGWAFTLKQFAEIYATRFQIKLMKRLWGDQFYDGKAKKWRGFVQFILDPIYKFEYTMNPKEEALALVEKLLTNEDKENYEKQLMKVVFRKWLPAGDALLQMITIHLPSPVTAQKYRMEMLYEGPHDDEAAKNCDSKGPLMMYVSKMVPTSDKGRFYAFGRVFAGTVATGQKARIMGPKYVPGKKEDLFVKSIQRTILMMGRYIESIDDVPCGNVCGLVGADQYILKTGTITTLETAHNLKVMKFSVSPVVRVAVECKHPSDLPKLVEGLKRLSKSDPLVQCSIEESGEHIVAGAGELHLEICLKDLEEDHACIPLKISEPVVSYRETVSEESSITCLSKSPNKHNRLFFRAVPMPDGLAEDIDSGVNTKQDGKERARYLAEKYGYDPNETRKIWCFGPEGTGPNIVVDCTKGVQYLNEIKDSVVAGFQWASKEGVLCEENLRGCRYNVLDVELHADAIHRGGGQIIPTTRRVLYAASLTASPKLMEPVYLVEIQCPEAAIGGVYSVLNKKRGVVFEENQVVGTPMFQIKAHLPVNESFGFTSTLRANTGGQAFPQCVFDHWQQLPGDPRPGVVIAAARKRKGLKEGIPPLENFYDKLXXXXXXXXXXXXXXXXXXXXXXXXXXXXXXXXXXXXXXXXXXXXXXXXXXXXXXXXXXXXXXXXXXXXXXXXXXXXXXXXXXXXXXXXXXXXXXXXXXXXXXXXXXXXXXXXXXXXXXXXTRTYDLNITYDKYYQTPRLWLYGYDENRKPLTVEQMYEDISQDHVHKTVTIEAHPYISGPPMASVHPCRHADVMKKIIENVAEGGKELGVHMYLMIFMKFVQAVIPTIEYDYMGRQPARCYRYCKNKPYPKSRFCRGVPDPKIRIFDLGRKKARSDDFPLCVHLVSDEWEQISSEALEAGRICANKYLTKHCGKDAFHLRVRLHPFHVVRINKMLSCAGADRLQTGMRGAFGKPQGTVARVHIGQVIMSVRARDTHTAKVIEALRRAKFKYPGRQKIYISSKWGFTKWERVDYEKMREDGVLIPDGVGVQYKPNKGPLFDDMHLREELLRGIFAYGFEKPSAIQQRAIIPCIKGHDVIAQAQSGTGKTATFAVSILQRIDTSLKECQALVLAPTRELAQQSQKVVLALGDYLDARCHACIGGTNVREDLHRLEQVVVGTPGRVFDMINRRALSTRYIKMFVLDEADEMLSRGFKDQIYDVFRNLQVILLSATMPVDVLEVTTRFMREPIRILVKKEELTLEGIRQFYVEVEKEDWKLDTLCDLYETLTITQAVIFCNTRRKVEWLTEKMTSRDFTISAIHGELEQGRRDVIMREFRSGSSRVLITTDLLARGIDVQQVSLVINYDLPTNRENYIHRIGRGGRFGRKGVAINFVTAEDFRSLKDIESFYNTEIEEMPMNVADLIFEGNNELGVFSKLTNAYCLVAIGGSENFYSIFEGELSDTIPVVHSSIAGCRIIGRLVVGNKNGLLVPNSTTDQELQHIRNSLPDTVKIQRVEERLSALGNVVVCNDYVALVHPDLDRETEEIIADVLKVEVFRQTIADNVLVGSYCALSNQGGLVHPKTKVEDQDELSSLLQVPLVAGSCNRGSDVIGAGMVVNDWAAFCGLDTTSTELSVIEGVFKLSIAPSIFGS-DIKRAIACLLFGGSRKRLPDGLTRRGDVNLLLLGDPGTAKSQLLKFVENCSPIGVYTSGKGSSAAGLTASVRDP--SRNFVMEGGAMVLADGGVVCIDEFDKMRQDDRVAIHEAMEQQTISIAKAGITTTLNSRCSVLAAANSVFGRWDDSKGEENIDFMPTILSRFDMIFIIKDEHCGPRLS--AAEKLKNRYVLMR---------------IPITVRQLEAIIRISESIAKMRLSPFAED--VEEALRLFQVSTLDAAMSGSLAGAEGFTTEEDQEM--RIEKQIKRRFVIGAQVSE--IVQDF--QKYPERAIKVI--HMLRRGEVQHRLQRKMLYRLQKGVEIIKKATEADSNEEYDQALQLYEHGVEYFLHAIKCETMAPKVKEVIRK--CYYLDRAEKLKETKAKKLSDSI-VEKPNVMWDDVAGLEMAKEALKEAVILPIKFPHLFQGKRKPWQGILLFGPPGTGKSYLAKAVATEANNSTFISVSSSDLVSKWVGESEKMVRNMFELARQKKPSIIFIDEVDSLCSARGGDESESARRIKTEFLVQMQGVGNDNVGVLVLAATNIPWVLDSAIRRRFEKRIYIPLPEART---MFKL-----------RTEGYSGADIGIVVRDAIMQPVRKVQMATHFRRVRGPSP-DPDVISDDLLTPCSPGAPGAE--MWTDVPGDKLLEP-VTMSDMLS--ISTKPTVNAG--LEHEKF-DDFGQDGRKIPVPSNRYGPLKENWMKIFTPVVEYLHLQIRFNLRTRHVEIKTCKETDIGALQKAADFVKAFILGFDIEDGLALVRLDDLYLESFCVTDVKPLKGDHLSRAVGRIAGKGGKTRFTIENVTRTRIVLADTKIHLLGSFQNIKIARAISNLILGSPPSKVYGIFTPTNQKRLTNVAIVRLKKTGKRFEIACYPNKV-PWRNKIETDIDEVLQTH-VFMNVSKGQVAKSEDLKKAFN-DVTDVCLQILAKGELQVSEKERH-NLESMFRDIAT-VADKCVNPETNRPYTVT-IERAMKDCHVSVKPTKSTKQQALEVIRQL-MFLTRSEYDRGVNTFSPEGRLFQVEYAIEAIKLGSTAIGIQTSEGIILAVEKRVTSSLIEPSSIEKIMEVDSHIGCAMSGLIADSRTLIDKARVEAQNHWFTYDEKISVQSIALAVSNLALAFGDDDADAMSRPFGVALLFAERGPQLIHMDPSGTFTQCDAKAIGSGSEGAQQALQDTYHKSMDLKQACVESLKILKEVMEEKLNSTNVE------VFSPDGHLFQVEYAQEAVKKGSTAVGVRGKDIVVLGVEKKAVAKLQEDRTVKKIALLDEHVALAFAGLTADARILIQRARVECQSHKLTVEDPVTLEYITRHLAQLKQKYTQSNGRRPFGLSTLIG---FDGPHLYQTDPSGTYHEWKANAIGRSAKTVREFLEKNYD----------IKLCLKALLEVVQSG-RNME-AVMRYDSRTTIFSPEGRLYQVEYAMEAIGHAGTCLGILATDGIVLAAEKRSTNKLLDEVSFSEKIYILYEDMACSLAGITSDANVLTNQLRLIAQRYSLQYQEPIPCEQVVSTLCDIKQAYTQFGGKRPFGVSILYMGWDRHYGYQLYQSDPSGNYSGWKATCIGNNSAAAVSLLKQDYKEGETDMPTALELSVKVLGKTLDTNKLTPDKVEIATLSR--------SPSGKLVQIEYALAAVAAGAPSVGIKAANGVVLATEKKHKSILYDEHSIHKVEMITKNVGMVYSGMGPDYRVLLKSARKLAQEYYRQYQEHIPTGQIVQRVANVMQEYTQSGGVRPFGVSLLIAGWTPYLYQCDPSGAYFAWKATAMGKNQTNGKTFLEKRYNEKLELEDAVHTAILTLKESFEGQMTEDNIEIGICGFRRLNPSDVKDAGFDRHITIFSPEGRLYQVEYAFKAINQGGLTSVAIRGKDSAVVATQKKVPDKLLDASTVSHVYPITDQIGCVMTGMTADSRSQVQRARYEAANWKYKYGYDIPVDMLCQRIADINQVYTQSAEMRPLGCTMILIAFDEEGPQVYRTDPAGYFCGCKATSAGVKQVEANSYLEKKIRKKETIELAITCLSSVLSADFKPSEIEIGVVSRDKQNFKILTEQEMSTNEELACVYSALILADDEVPITSEKISTILKAAKVAVEPIWPSLFAKALTG-NVRDLI-SVGSSKLSRDTVNEAAASVLKGAKKRKFTETVELQISLKNYDPQKDKRFAGTVKLKHIPRPRMKVCILGDQQHCDEAKVNNLSNMDVDSLKKLNKNKKLVKKLAKKYSAFLASDSLIKQIPRILGPGLNKAGKFPTPLSHGESMKVEEVKATIKFQMKKVLCLSVAVGHVQMSADELTSNIILSVNFLVSLLKKNWQNVRALYIKSTMGPAIRIFMPPKFDPTAVHTVYMRAVGGEVGATSSLAPKIGPLGLSPKKVGEDIAKATADWKGLKVTVQLTVQNRQAKVSVVPTASALVIRALKEPARDRKKVKHVKHNGNIAFDEIINIARTMRRSMARSLAGTVKEVLGTAQSVGCTIDGCHPHDIIEKVDDGEYEVPMGAYKYMQELDRKKQTDAMRFLLRVRTWHLRQLNSIHRAPRPTRPEKARRLGYRAKQGYVIYRVRIRRGGRRRKAPKGQVYGKPVNHGITQLKNQRSIQAVAEERVGRKCQELRVINSYWVAQDATYKFFEVITVDPFHKAIRRDPKIQWICESNAKHREMRGLTSANKKSRGLGKGHRYTKTTGGSRRGNWKRRNTLQLRRKRMTRYSQDAENATKSAKAKGSHLRVHFKNTRETANTIKRMHLRRAVAFLKNVTQMKECVPFRRYNGGVGRCAQAKNWNTQGRWPKKSAEFLLQLLKNAESNAEYKGLDTDHLVIEHVQVNRAPKMRRRTYRAHGRINPYMSSPCHIEIILAEKEMKIELCNYSGYKIYPGHGKKVIKQDGRFFHFLNAKCERSFNMKRNPREVPWTVLYRRKHKKGQQEEVAKKRTRRTHKFQRAIAGASLTDIMAKRNQKPEVRKAQREQAIRKKIRSKPRFTRPHTLRLPRTPKYPRKSTHHAPRMDQYKIIKYPLTTESAMKKIEDNNTLVFIVHQKANKPQIRMAVKKLYSIDVSKVNTLNRPDGEKKAYVRLAPDYDALDVANKIGIISHRKFSAPRHGSLGFLPRKRSTRHRGKVKAFPKDDPSKPVHLTSFLAYKAGMTHVVREVDRPGSKAHKKEVVDAVTILEAPPMIAIGVIGYIETPRGLRALKTVWAEHLSEECRRRFYKNYRSKKKAFTKASKKWQDEVGKKEIEKDLAKMKKYCSVIRVIAHTQMKLLKKRQKKAHIMEIQVNGGTVAQKVDWAREHFEKQIPVDSVFAPDEMIDCIGVTKGHGFKGVTSRWHTKKLPRKTHKGLRKVACIGAWHPARVAFSVARAGQKGYHHRTEINKKIYRMGKGKLIKNNGSTEYDVTEKTITPMGGFPHYGEVNQDFIMLGGCCMGPKKRVITLRKSLLTHTKRKALEKMNLKFIDTSSKFGHGRFQTHQEKKTVTSEVVTREHTINLHKRIHGVGFKKRAPRALKEIRKFAEKHMGTPDVRVDTRLNKFIWQHGISNVPFRVRVRMARKRNEDEDSTHKLYTLVSYVPVTTFKGTQTVNVEIVKKRTKRFIRHQSDRYVKVKAAWRKPRGIDNRVRRRFKGQYLMPNIGYGSNAKTRHVCPDGFKRFVIHNVRDLEVLLMQNRTYSAEIAHGVSSKRRKDIVERAQQLSIKVTNPSARIRSEENEXXXXXXXXXXXXXXXXXXXXXXXXXXXXXXXXXXXXXXXXXXXXXXXXXXXXXXXXXXXXXXXXXXXXXXXXXXXXXXXXXXXXXXXXXXXXXXXXXXXXXXXXXXXXXXXXXXXXXXXXXXXXXXXXXXXXXXXXXXXXXXXXXXXXXXXXXXXXXXXMAAHKSFRIKKKLAKKQKQNRPIPQWVRMQTGNTIRYNAKRRHWKRTKLKLDKSSWKASYFLKLIELIDEYPKCFLVGVDNVGSKQMQQIRIALRGHGVVLMGKNTMMRKAIRSHLENNPSLEKLLNYIKGNVGFVFTKGDLTEVRKIIQENRVGAPAKAGALAPLSVMVTARNTGLGPEKTSFFQALAIPTKITKGTIEILNDVQLIKEGEKVGASEATLLTMLKIMPFSYGLVIQQVYDSGTVFHPSILDMSDDDIRGKFMSGVSRVASLCLAIGYPTLASVPHSVVNGFKNLLAVAAATDFKEAETVKEFLKDPSKFXXXXXXXXXXXXXXXXXXXXXXXXXXXXXXXXXXXXXXXXXXXXXXXXXXXXXXXXXXXXXXXXXXXXXXXXXXXXXXXXXXXXXXXXXXXXXXXXXXXXXXXXXXXXXXXXXXXXXXXXXXXXXXXXXXXXXXXXXXXXXXXXXXXXXXXXXXXXXXXXXXXXXXXXXXXXXXXXXXXXXXXXXXXXXXXXXXXXXXXXXXXXXXXXXXXXXXXXXXXXXXXXXXXXXXXXXXXXXXXXXXXXXXXXXXXXXXXXXXXXXXXXXXXXXXXXXXXXXXXXXXXXXXXXXXXXXXXXXXXXXXXXXXXXXXXXXXXXXXXXXXXXXXXXXXXXXXXXXXXXXXXXXXXXXXXXXXXXXXXXXXXXXXXXXXXXXXXXXXXXXXXXXXXXXXXXXXXXXXXXXXXXXXXXXXXXXXXXXXXXXXXXXXXXXXXXXXXXXXXXXXXXXXXXXXXXXXXXXXXXXXXXXXXXXXXXXXXXXXXXXXXXXXXXXXXXXXXXXXXXXXXXXXXXXXXXXXXXXXXXXXXXXXXXXXXXXXXXXXXXXTIRTRKFLTNRLLNRRQMVVDVLHPGRATVPKTEIREKLGRMYKTTADVVFCFGFKTQFGGGKTTGFALIYDTLDYAKKLEPKFRLARHGLVERKQRKERKNRQKKVRGVKKXXXXXXXXXXXXXXXXXXXXXXXXXXXXXXXXXXXXXXXXXXXXXXXXXXXXXXXXXXXXXXXXXXXXXXXXXXRGPRMHLKRLAAPKHWMLDKLGGVFAPRPSTGPHKLRECLPLVIFLRNRLKYALTYTEVMKILNQRLIKVDNKVRTDKTYPAGFMDVISIERTNENFRLIYDVKGRFAVHRITPEEAKYKLCRVRALKTGPKGVPFLTTHDARTIRYPDPLIKPNDTVQVDLATGKIKDYIKFDSGNLCMITGGRNLGRVGLITHREKHPGSFDIIHVKDTTGHIFATRMSNVFVIGKGNRAWVSLPKGKGVKLSIAEERDKR-KLNISYPATGCQKLIEVDDERKLRHFYEKRISAEVNADHLGDEWKGYVLRISGGNDKQGFPMKQGVLTVGRVRLLLSAGHSCYRPRRSGERKRKSVRGCIVDANLSVLSLVIVKKGEQEIPGLTDSSVPRRLGPKRASKIRKLFNLAKDDDVRQYVVRRPLPAKEGQKSKAPKIQRLVTPLVLQRKRDELESQVSQALLELEMNSDLKAQLRELHITGAKEKKAIMIFVPVPQLRAYQKIQARLVRELEKKFSGKYVVFIAQRRILAKPTRKSKQKRPRSRTLTTVHENILDDLVFPAEIVGKRIRIKLDGSRLIKVHLDKTQQTNIEHKLDTFTAVYKKLTGKSVTFEFMGISQDKWHKRRKTGGHMPIMRKKRKFELGRPAANTKLGSYRVHKVRIRGGGYKMRALRLETGNYSWGSEAQTRKTRLLDVVYNASNNELVRTKTLVKNCIVQIDATPFRQWYEAHYAVPLGRRKGMKLKRSKKTQKKYDERKKTAKIDTALEEQFITGRLYACVTSRPGIHGRCDGYILEGKELEFYARKIKAKKLCDFVSELLLEESNVQPVSTPVTVCGDIHGQFYDLKELFRTGGD-PDTNYIFMGDFVDRGYYSLESFTLLLCLKARWPDKVTLLRGNHESRQITQVYGFYDECQTKYGNANAWRYCCKVFDLLTIAAIIEECVLCVHGGLSPDIKTLDQIRMIERNQEIPHKGAFCDLVWSDPEVDTWAVSPRGAGWLFGAKVTNEFVH-NNLKLICRAHQLVHEGYKYMFDDKLVTVWSAPNYCYRCGNIAGKLMAVIGDEDTCTGFLLGGIGELDKHRRPNFLVVDKTTSVSEIEEAFNKFVGRGDIAIILIGQNIAEEIRHILDAYPIPAILEIPSKDHPYDSSKDSILRRAKGMFSAEDDSDIRIWVFLPIVLITFLVGIIRHYVATLMTSEKDSQALIRSRMLRENGKFLPRASFEMRKHYFNNKDDGYFATQNPMTDPTMMADMMKGNVTNVIPMIVIGGWINWAFSGFLTTKVPFPLTLRFKPMLQRGVELSALDASWVSSASWYFLNVFGLRSMYNLILGQDNAADQTRMMQDQMTGAAMGMPPDPMGDRYNIHSQLEHLQSKYIGTGHADTTKWEWLTNQHRDSFASYLGHFDMINNFAIVENETKARVRFNLMEKMMQPCGAPPEKPEDLVLVLGDLHIPHRSISMP-KFKKLLVPGKIQHILCTGNLCTKESFDYLKTLASDVHVVRGDFDENYPEQKVVTVGQFRIGLCHGHHVVPWGDIESLAVVQRQLDVDILISGHTHKFEAFEHENKFYINPGSATGAYNAIPSFVLLDIQQSTVVAYVYQLLGEDVKVERIEYKKXXXXXXXXXXXXXXXXXXXXXXXXXXXXXXXXXXXXXXXXXXXXXXXXXXXXXXXXXXXXXXXXXXXXXXXXXXXXXXXXXXXXXXXXXXXXXXXXXXXXXXXXXXXXXXXXXXXXXXXXXXXXXXXXXXXXXXXXXXXXXXXXXXXXXXXXXXXXXXXXXXXXXXXXXXXXXXXXXDPFSEEEKTDGYVHIRIQQRNGRKTLTTVQGIKPEFDLKKIVKVAKKEFACNGTVVEHPEYGEVIQLQGDQRQLISNFLKEVGLATTESIKVHGFFEARLAQGTLLKKVLEAIKDLLNEATWDCNENGMSLQAMDSSHVSLVSLTLNAEGFEPYRCDRNCSLGINLASMSKIFKCASNEDSITIKAGDDTITYVFESPNGDKVSDYEMKLMDIETDHLGIPDTTYSCVVKLPAAEFQRICRDLSQIGESVTICCTKDGVRFSASGDLGSGNIKLAQNANVDKEDEAVTIEMQEACTLTFALRYLNFFCKATPLSPQVTLSMSNEVPLVVEYKIGEMGHVRYYLAPKI---------VVTANKMSGSAMYELVRVGHYELVGEIIRLEGDMATIQVYEETSGVTVGDPVLRTGKPLSVELGPGIMGSIFDGIQRPLQDI---ATSIYIPKGINTPALGR---WDYRVGSHITGGDIYGVIYENNLIQHKIMLPPKARGTISWMAEAGSYDINDVILETEFDGEK-KYTMMQVWPVRQLRPVNEKLAANHPLLTGQRVLDALFPCVQGGTAAIPGAFGCGKTVISQSLSKYSNSEVIVYVGCGERGNEMSEVLRDFPELTMTVDG-EETIMRRTALVANTSNMPVAAREASIYTGITLSEYFRDMGLNVSMMADSTSRWAEALREISGRLAEMPADSGYPAYLGARLASFYERAGRVKCLGNPDREGSVTIVGAVSPPGGDFSDPVTSATLGIVQVFWGLDKKLAQRKHFPSVNWLISFSKY-RALDEYYDKNFGDFVALRTKVKEILQEEEDLSEIVQLVGKGSLAEGDKITMEVAKILKDDFLQQNGYSSYDRFCPFYKTTGMMRNII-FYEMARHAVESTAQSNKITWII--REMNDIIYKLSSMKFKDPGADGEAKIKADYDELHE-MQTAFRNLEDFPSRMAMTIMK-RLTGAQKGHSLLKKKSDALTVRFR-ILKKIIETKVLMGQVMKEASFSLAEAKF--GDFNHLVLQNVNKAQVKVRSKKDNVAGV-LPVFESYQDGDSYELTGLSKGGQQINRLKKNYSKAVELLVELASLQTSFVTLDEVIKVTNRRVNAIEYVVIPRIERTLAYITTELDEREREEFFRLKKIQKKMPQNEHIEQHIRRHGRRLDYHEKKRKKESREAHE-SKKAQGLKGLKAK--HKKRQSEKVQMKRTIKMHQQRKTKAVPAYLLDREQTRAKVLSNMIKQKRKEKAGKWDVPLPKVKGVSESDVFKV-KTGKTRRKGWKRMVTKACFVGEGFTRKPPKYERFIRPMGLRVKKAHVTHPELKATFCLPILGVKKNPTSPMYTQLGVLTKGTIIEVNVSELGMVTQGGKVVWGKFAQVTNNPENDGCVNAVLL
Platycentropus_radiatus        RTSGAPVRTQNVMAACSIANIVKSSLGPVGLDKMLVDDIGDVTVTNDGATILKLLEVEHPAARVLVELAQLQDEEVGDGTTSVVILAAELLKNADDMVKQKIHPTSIIAGYRLACKEACKYITDNLSIPTEALGKECIINCAKTSMSSKIIGADMNFFSEMVVDAANAVKDAKGNVLYPIKSVNVLKAHGKSTRESVLVNGYALNCTVASQAMVKKVTDAKIACLDFSLQKAKMKMGVQVLVTDPEKLEAIRARELDITKERIEKILSTGVNVVLCTGGIDDLCLKYFIEAGAMAVRRCKKTDLKRIAKATGAKYLTSLTNLEGEESFDVKMIGEAAEVVQDLVCDEELILIKHSAASIILRGPSDTYCDEMERSVHDALCVVKRVLEGKKVVPGGGCVEAALSIYLENFATTLGSREQLAIAQFAQSLLVIPKTLAVNAALDATDLVAKLRAYHNASQTQLDYKWIGLDLYKGIVVNNRDAGVLEPEISKIKALKFATEAAITILRIDDMIRLKSKPTDIRLSNINAAKAVSDAIRTSLGPRGMDKMIQAGNGEVTITNDGATILKQMNVLHPAAKMLVELSRAQDIEAGDGTTSVVVIAGALLNEVEKLLGKGIHPSVISDGFQRAVQQAVKILIARPVEMNDEDSLIQAAATSLCSKVVSQHVSLLAPIAVKAVLASCDLRDVRVIERLGGTLEDSELVRGLVLSQKGPRKVEKPLIGLIQFCISPPKTDMDHNVVVSDYAAMDRVLKEEREYILNIVKKIKASKCTVLLVQKSILRDALSDLAVHFLDKIKVMVVKDVEREDIEFICKTLACRPIASLDHFLPENLVKADLAEEPCGKFVKITGIQNPTISVIVRGSNRLMLAEAARSMHDALCCVRCLVRRPFLLAGGGAGEAHVSLELAARAQQAPGADHYCLRAYADALTVIPSTLAENAGLSPIGIVTELHAAHVAGQKNAGISVRRGCIADMVEEKVLQPLLVSTSALTLATETVRSILKIDDIFDEFGRPFIIIRDQENQKRLTGNDALKSHINAACQTAAMLRTSLGPRGLDKLLVSPDGDVTVTNDGATILKLMDAGHEIAKLLAQLAQSQDDEIGDGTTGVVVLAGALLEQALSLIDKGIHPTRIADGYDEAARACLAHLDSIAEPFPVDRNNEPLVKTAMTTLASKIINRCHRQMAEIAVEAVLTVADLEKRDVNFELMKVEGKVGGKLEDSMLVRGVVIDKTMSHPQMPKLLKDVKIAILTCPFEPPKPKTKHKLTVGSTEDYKALRQYEQDKFRQMVKQVKDAGATLAICQWGFDDEANHLLLSENLPAIRWVGGPEIELVAIATGGRIVPRFEELSPAKLGTAAVVRELTFGTTNDQMMVIEGCGNTRAVTILVRGGTKMAVDEAKRSIHDALCVVRSLVQDSRVVFGGGAAETSCSLATAALADQQKGLRQHSFRAFSDALESIPLALAENSGLSPIDVLSELKTRQIAEKNPALGVDCMNNGTNDMKAMHVIESLNSKKQQISLATQLVKMILKIDDVR--------------------------------------------------------------------------------------------------------------------------------------------------------------------------TVKDGKTLVDELEVIEGMKFDRGYISPYFINSSKGAKVEFQDALVLFSEKKISSIQSVIPALELANRKPLVIIAEDIDGEALSTLVVNRLKIGLQVAAVKAPGFGDNRKSTLNDMAIACGGVVFGDDSNLLKLEDIQATDFGQVGEILITKDDCLLLKGKGKKVDIDRRADQLRDQIKDTTSEYEKEKLQERLARLASGVAVLRIGGSSEVEVNEKKDRVNDALNATRAAVEEGIVPGGGTALIRCSPALLLLKTANSDQATGIEIVRNALRMPCMTIAKNAGIDGASVVAKVGYDAMNNEYVNMIEKGIIDPTKVVRTALTDASGVASLLTTAEAVVCDQPKYNFKKIAVVPTAKEFIDVMLSKTQRKTPTVVHKHYKISRIRGFYMRKVKFTQQNFHDRLSRIIQEFPKLDDVHPFYADLMNVLYDKDHYKLGLGQLNTARHLIDTVAKDYVRLLKYGDSLYRCKQLKRAALGRMATIMKRQGANLTYLEQVRQHLSRLPSIDPYTRSIIICGFPNVGKSSFINKITRADVEVQPYAFTTKSLYVGHTDYKYLRWQVLDTPGILDHPLEDRNVIEMQAVTALAHLRACALYFMDISEQCGHSLEEQIALFESIRPLFSNKPLVVVINKVDVLRVQDLSGEGVQEVKIEACERLLGFRVDTKMRTKKRLHVAVPAPRDKPRLPCIPKLEREIELEEGDDYVLDLQKNYERHDIIPEFWEGHNIADYIDPKEHINVVFIGHVDAGKSTIGGQIMSLTGMVDKRTLEKYEREAREKSRESWYLSWALDTNQEERDKGKTVEVGRAYFETEKKHFTILDAPGHKSFVPNMIGGAAQADLAVLVISARKGEFETGFDRGGQTREHAMLAKTAGVKHLIVLVNKMDDATVNWDEGRYNECKDKILPYLKKLGFNPTKDLNFLPCSGQTGQGICPWYRGPAFIEFIDMPSLNRKMDGPFIMPVVDKYKDMGTVLMGKVEAGSSRKGQLLLLMPNRTQVTVDQLWSDDEEVTSIGPGENVKIKLKGIEEEDVSPGFVLCDAANPITTGRVFDAQVVILEHKSIICAGYSAVMHIHCAAEEVTVKALICLVDKKTGDKSKTRPRFVKQDQVAIMRIEICLEQFKVFQQMGRFTLRDEEIRGMMDKKRNIRNMSVIAHVDHGKSTLTDSLVSKAGIIAGAKAGETRFTDTRKDEQDRCITIKSTAISMYFELDEKDCVFIGFLINLIDSPGHVDFSSEVTAALRVTDGALVVVDCVSGVCVQTETVLRQAIAERIKPIVFMNKMDRALLELQLDSEELYQTFQRIVENINVIIATYSDGPMGEVRVDPSKGSVGFGSGLHGWAFTLKQFSEMYAEKFKIKLMNKLWGENFFNGKTKKWRSFCMYVLDPIYKFDSIMNRKEEVEQLLVKILKHEDKDKDGKALLKVVMRTWLPAGEALLQMIAIHLPSPVVAQRYRMEMLYEGPHDDEAAKNCDPLAPLMMYISKMVPTSDKGRFYAFGRVFSGRVSTGQKARILGPNFTPGKKEDACEKTIQRTILMMGRYTEAIEDVPCGNICGLVGVDQFLVKTGTITTFKDAHNMKVMKFSVSPVVRVAVEPKNPADLPKLVEGLKRLAKSDPMVQCIIEESGEHIIAGAGELHLEICLKDLEEDHACIPIKKSDPVVSYRETVGEESDQMCLSKSPNKHNRLYMRSQPMPDGLAEDIDDGVNPRDDFKTRARYLNEKYDYDVTEARKIWCFGPDGNGPNVLMDCTKGVQYLNEIKDSMVAGFQWAAKEGVLAEENLRGVRFNIYDVTLHTDAIHRGGGQIIPTTRRCLYACLITAQPRLMEPVYLCEIQCPEVAVGGIYGVLNRRRGHVFEEMQVTGTPMFVVKAYLPVNESFGFTADLRSNTGGQAFPQCVFDHWQVLPGDPKPWQVVQDIRKRKGLKEGLPDLAQYLDKLDSGASATFPMQCSALRKNGFVMLKGRPCKIVEMSTSKTGKHGHAKVHMVGIDIFNGKKYEDICPSTHNMDVPHVKREDYQLTDID-DGYLTLMDNGDLREDLKIPDGTVLKSCGEECVIATRTYDLHITYDKYYQTPRLWLIGYDEKRMPLTVDQMYEDVSQDHAKKTVTMESHPNLPGPSMASVHPCRHAEVMKKIIETVMESGGELGVHSYLIVFLKFVQTVIPTIEYDFMGRRPARCYRYCKNKPYPKSRFCRGVPDAKIRIFDLGKKKASVEDFPLCIHLLSDEYEQLSSEALEAGRICCNKYLVKNCGKDQFHIRMRVHPFHVIRINKMLSCAGADRLQTGMRGAFGKPQGTVARVRIGQPIMSVRSSDRYKPAVIEALRRAKFKFPGRQKIYASKKWGFTKYERDVYEKLRDDNRLAQDGCNVKYRPEHGPLFDDMNLNERLLRGIYAYGFEKPSAIQQRAIMPCVKGHDVIAQAQSGTGKTATFSISILQQIDTSRLECQALIMAPTRELVQQITKVVLALGDYMDVQCHACIGGTNVREDMRILEHVVVGTPGRVFDMMSRRALRPGTIKMFVLDEADEMLSRGFKDQIHDVFKMLQVILLSATMPNEVMEVSKCFMRNPVSILVKKDELTLDGIKQFYVSVEREDWKLETLIDLYDTLSITQAVIFCNTRRKVDWLTQSMQDKDFTVSSMHGDMDQKERDTIMKQFRTGSSRVLITTDLLARGIDVQQVSLVINFDLPSNRENYIHRIGRGGRFGRKGVAINFVTLDDRRALKDIEEYYSTVIDEMPQDVANLLFENNNEVGVFSKLTNSYCIVAIGGSENFYSVFEAELADTIPVVHASIAGCRIVGRMAVGNKNGLLVPSSTTDTELQHLRNSLPDAVRIQRVEERLSALGNVIACNDYVALVHPDLDRETEEVLADVLKVEVFRQTVASNVLVGSYTVLSNQGGLVHPKTSIQDQDELSSLLQVPLVAGTVNRGSEVLAAGMVVNDWCSFCGMDTTSTEISVIESVFKLSIAPSIFGAKDIKKAIACLLFGGARKRLPDGLTRRGDINVLLLGDPGTAKSQLLKFVEKVSPIGVYTSGKGSSAAGLTASVIRDPVTRNFVMEGGAMVLADGGVVCIDEFDKMREDDRVAIHEAMEQQTISIAKAGITTTLNSRCSVLAAANSIFGRWDDTKGEENIDFMPTILSRFDMIFIVKDEHCGPRLSATAGEKLRSRYVLMRSGTLAQEKATEKRLSIPITVRQLEAIIRISESLAKMQLQPFATEVHVNEALRLFQVSTLDAAMSGSLAGAEGFTTDEDHETLSRIEKQLKRRFAVGSQVSEQSIIQDFLRQKYPERSILKVVHTMIRRGELQHRMQRKMLYRLQKAIDLVTKATEEDRNKNYEEARRLYEHGVEYFLHAIKYEAQGDRAKESIRAKCLQYLDRAEKLKKKLQSQLEGAIIVEKPHVKWSDVAGLELAKEALKEAVILPIKFPHLFTGKRIPWKGILLFGPPGTGKSYLAKAVATEANNSTFFSVSSSDLVSKWLGESEKLVKNLFELARQHK--------------------------------------------------------------------------------------------------------------------------------------------------------------------------------------------------------------------AVPAHRYTPLKEKWAQIFSPIVEHLLLRVRFNLKTRNVEIKIGPETDISNLQKAADFVKAFIYGFEVEDALALLRLDDLFVESFEVKDVKTLRGDHMSRAIGRLAGKGGRTKFTIENVTKTRIILADSKIHILGSYQNIQLARAVCNLILGSPPSKVYGIFTPTNQIRLTNVAVVRLKKGGKRFEIACYKNKVLSWRNKVEKDIDEVLQSHSVFTNVSKGQVAKKEDLVKIFSDDVTEICKEILEKGELQVSDKERSSQLDALFKDIATTVADKCINPETKRPYPVSIIEKAMKDAHYSVKPNRNAKQQALDVIPLLKMFLTRSEYDRGVNTFSPEGRLFQVEYAIEAIKLGSTAIGIATSEGVVLAVEKRITSPLMEPTTIEKIVQVDRHIGCAVSGLMADSRTLIERARVECQNHWFVYNERMTVESCAQAVSNLAIQFGDSDEDAMSRPFGVAILFAEKGPQLYHMDPSGTYVQFSAKAIGSGSEGAQQSLQEVYHKSLTLKEAITSALTILKQVMEEKLSEFNVEYDRAITVFSPDGHLLQVEYAQEAVGKGSTAVGVRGDDVVVLGVEKKSVAKLQEERTVRKICLLDDHVVMAFAGLTADARILINRAQIECQSHKLTVEDPVTLEYITRYIAGLKHKYTQSNGRRPFGISCLIGGFDYDGPHLYQTEPSGIYFEWKANATGRSAKTVREFLEKHYTLEEVATEHGAVKLAIRALLEVVQSGQKNLEIAVMRYDTRTTIFSPEGRLYQVEYAMEAISHAGTSLGILATDGILLAAERRNTNKLLDEVCFSEKIYKLNEDMVCSVAGITSDANVLTNELRLIAQRYLLQHGESIPCEQLVSWLCDVKQAYTQYGGKRPFGVSILYMGWDKHYGYQLYQSDPSGNYGGWKATCIGNNSSAAVSSLKQEYKENETNLAQAQALAVKVLSKTLDMTKITSEKVEMATLTRYSFSLTTFSPSGKLVQIEYALAAVAAGAPSVGIKASNGVVIATENKHKSLLYCPQSVNKVETITESAGAVYSGMGPDYRLLVKRARKMAQQYKLMYGHTIPTAQLVQRVAAVMQEYTQTGGVRPFGVSLLICGWRPYLFQCDPSGSYFSWKATAMGKNHVNGKTFLEKRYSEDLELDDAVHTAILTLKEGFEGQMTADNIQIGICGFRRL-------AGFDRHITIFSPEGRLYQVEYAFKAINQGGLTSVALRGNNVAVCATQRKVPDKLLDPSSVTHLFQLTENIGCVMTGMIADSKSQVQRARYEAGNWHYKNGYDIPVDVLCRRIADISQVYTQNAEMRPLGCSMMLIAFDAEGPCVYKTDPAGYFCDYQAISVGAKQTEANSYLEKKLKKKEAIQLAISCLSTVLSVDFKPSEIEVGVVCKEKPKFVVLSE--MTNKAELACVYSALILVDDDVAVTGEKISTILKAANVTIEPYWPGLFAKALEGVNVKDLITNIGSSKVSRDQLYEGVNAVLQHCHKKNFLETVELQIGLKNYDPQKDKRFSGTVKLKYIPRPKMQVCILGDQQHCDEAKAQNVPWMDAEGLKKLNKNKKLVKKLAKKYDAFLASESLIKQIPRLLGPGLNKAGKFPGLLSHQESMKVDEVKATIKFQMKKVLCLSVAVGNVAMTPDELAQNVHLAINFLVSLLKKHWQNVRSLHMKSTMSPPQRLYMPPKFDPSEVKVVYLRCVGGEVGATSSLAPKIGPLGLSPKKVGDDIAKATGDWKGLKITVCLTIQNRQAAITVCPSAASLIIKALKEPPRDRKKQKNIKHNGNLAFDEVIAIAKQMRRSMARELSGTVKEVLGTCQSVGCTIDNKNAHDLIDEIKAGT----MGAYRYIQELYRKKQSDVLRYLLRIRVWQYRQLTRMHRAPRPSRPDKARRLGYRAKQGYVIFRIRIRRGGRKRPVPKGATYGKPKSHGVNQLKPTRKLQSMAEERVGRRCGGLRVLNSYWVAQDSSYKYFEVILIDPSHNAIRRDPKINWIVKAVHKHRELRGLTSAGKSSRGLGKGRRFSQTTGGSRRASWIRRNTLQLRRKRMGRYSREPDNPAKSCKARGSNLRVHFKNTHETAMAIKRLPLRRAVRYLKNVIDKKECIPFRRFNGGVGRCAQAKQFGTQGRWPKKSAEFLLQLLRNAESNADYKGLDVDRLVIDHIQVNRAPCLRRRTYRAHGRINPYMSSPCHIEVCLSEREMKIGLCSYSGYKIYPGHGKTLVRVDGKSFTFLNSKCEAAHLMKRNPRKVTWTVLYRRKYKKGQEEEQAKKHTRRTQKFQRAIVGASLSDILAKRNMKPEVRKAQREQAIRRKIRTSVHFRRPKTFRPPRNPKYQRNSVAKRTRMDAYNIIKYPLTTEAAMKKIEDNNTLVFIVHTRSNKHHIRQAVKKLYDINVAKVNTLIRPDGKKKAYVRLARDYDALDVANKIGIISHRKFSAPRHGSMGFYPKKRSRRHRGKVKAFPKDDPTKPVHLTAFIGYKAGMTHVVREADRPGSKINKKEIVEAVTILETPPMVVVGVTGYIETPHGL----------------RRFYKNYKSKKKAFTKSCKKWQDDLGRKSIEKDFKKIVRYCTVVRVIAHTQMKLLKQRQKKAHVMEIQLNGGSIEDKVKWAKEHFEKPININNVFAADEMIDCIGITKGKGYKGVTSRWHTKKLPRKTHKGLRKVACIGAWHPSRVSFTVARAGQKGYHHRTEMNKKIYRIGAGKVIKNNASTEYDLSEKSITPMGGFPHYGEVNNDFIMIKGCCMGPKKRVITLRKSLRVHTKKAALEKINLKFIDTSSKFGHGRFQTPLDKKSAINEVVTREYTVNLHKRLHGVGLKKRAPRAIKEIRKFAEKQMGTPDVRVDTRLNKFLWSKGIRNVPFRVRVRLSRRRNDDEDSANKLFTLVTYVAVPTLKGLQTENVDIVKKRTKKFIRHQSDRYDKLKRNWRKPKGIDNRVRRRFKGQFLMPNIGYGSNKKTKHMLPNGFRKVLVHNVKELEILMMQNRRYCAEIAHGVSSKKRKLVVTRAQQLSIRVTNPHARLRTQENEXXXXXXXXXXXXXXXXXXXXXXXXXXXXXXXXXXXXXXXXXXXXXXXXXXXXXXXXXXXXXXXXXXXXXXXXXXXXXXMTKGTSSFGKRRNKTHTLCRRCGRSSYHIQKSQCAQCGYPAAKLRSYNWSVKAKRRKTTGTGRMRHLKIVRRRFRNGFRVGXXXXXXXXXXXXXXXXXXXXXXXXXXXXXXXXXXXXXXXXXXXXXXXXXXXDKATWKSNYFTKLITLLDEYPKCFIVGADNVGSKQMQQIRMSLRGHAVVLMGKNTMMRKAIRGHLETNPALERLMPHIKGNVGFVFTKGDLVEVRDKLLENKVRAPARAGATAPLAVIVPAQNTGLGPEKTSFFQALAIPTKISKGTIEIINDVHILKPGDKVGASEATLLNMLNISPFSYGLMVEQVYDSGTIFAPEILDIKPEDLRAKFLAGVANLAAVSLEIGYPTLASAPHSIANGFKNLLAIAATTEFKEATTIKEFIKDPSKFIDPFTRKDWYDVKSPSMFPKREIGKTLVNRTQGTKIASEGLKGRVFEVSLADLQNEERSFRKFRLVAEDVQGREVLTNFHGMDLTTDKLRSMVKKWQTLIEACTDVKTTDGYLLRVFCIGFTMKSQRKTSYAQHTQVRKIRKKMCELIARNVTTTDLKGVVSKLLPDSIAKDIEKACQTIYPLHDVYIRKVKVLKKPRMDSSRLKELHEPEGYEPPVQENVMLMPKQSRVTIYEYLFKEGVMVAKKDFHAPKHIPNLHVIKAMQSLKSRGYVKEQFAWRHFYWYLTNEGIEYLRTYLHLPPEIVPATLKEKAFQKQPTVNFNKKKFMRYHRDIGLGFRTPREAVEGTYIDKKCPFTGNVTIRGRILTGVVQKLKMQRTIVIRRDYLHYIKKYNRFEKRHRNMSVHLSPCFRDVDIGDVVTIGECRPLSKTVRFNVLKV--HRIRITLTSRNVKSLEKVCTGLVANAKKQKLRVKGPVRMPTKILRITTRKTPCGEGSKTWDRFQMRIHKRVIDLHSPSEIVKQITTINLEPGVEVEVTIADTIRTRKFMTNRLLARKQMVCDVLHPGKPTVSKTEIREKLAKMYKITPDVVFVFGFRTKFGGGKSTGFALIYDTLDNAKKFEPKHRLARHGLYERKQRKERKNRMKKVRGTKKVRDKLNNQVLFDKATYEKLLKEVPSYKLITPAVVSERLKIRGSLARRALIELRDKGLIKQVVQHHGQVIYTRTTRGPKKHLKRLNAPKAWMLDKLGGVFAPRPSTGPHKLRESLPLVIFLRNRLKYALTNSEVTKIVMQRLIKVDGKVRTDPNYPAGFMDVVSIEKTGELFRLIYDVKGRFTVHRITPEEAKYKLCKVKKLQTGPKNVPFLTTHDGRTIRYPDPLIKVHDTIRLDIATSKIMDFIKFDTGNLCMITGGRNLGRVGIIVSRERHPGSFDIVHVKDSQDHTFATRMNNVFIIGKRKKAYVSLPRGKGVKLSVAEERDKRMKLNVSYPATGCQKLFEVVDEHKLRIFYEKRLGAEVAADALGDEWKNYVLRISGGNDKQGFPMKQGVLSTVRVRLLLAKGHSCYRPRRTGERKRKSVRGCIVDANLAVLALVVVRKGDQEIPGLTDSTVPRRLGPKRASGIRKLFNLSKEDDVRRYVIKRALPVKEGKRTKAPKIQRLVTP-------DQFESSISQALVELQNNSDLKAQLRELYITRAKEKKSIIIYVPMPKLKAFQKVQIRLVRELEKKFSGKHVVFVGDRKILSKPTRGYKQKRPHSRTLTSVYDSILEDLVFPAEIVGKRVRIRLDGSRFIKVHLDKNQQTTIEHKVDTFQSVYKKLTGREVNFEFMGISRDHWHKRRATGGKRKPMRKKRKYELGRPAANTKLGLRRIHVVRTRGGNLKYRALRLEGGNFAWGSECTTRKTRIIDVVYNASNNELVRTKTLVKNAIVVIDATPFRQWYESHYVLPLGRKKGAKLKFNNKTAKKYTTLQKTAKVEPALEEQFHTGRLLACLRSRPGQCGRADGYIIEGKELEFYLRKIKSKKLCGLVCDLLTEESNIHPVQTPVTVCGDIHGQFYDLEELFRIGGQVPDTKYIFMGDFVDRGYYSLETLTRLMTLKARFPDRITLLRGNHETRQITQVYGFYDECLTKYGNANAWMDCCRVFDLLTIAALIDDKVLCVHGGLSPDLKTLDQIRCIHRDREIPHKGAFCDLVWSDPEVERWMVSPRGAGYLFGEQVTKEFLEINSLNLICRAHQLVDEGYKYMFGDRLVTVWSAPNYCYRCGNVAGKLISVIGDEDTCVGFLLGGVGEINKNRHPNFMVVDKNTAVSEIEDCFKRFLKRDDIDIILINQNVAELIRHVIDGHPVPSILEIPSKDHPYDASKDSILRRARGMFNPDDDPNIRGWVFLPIVTITFLVGILRHYISIILSSQKDSQVMIRSRLLRENGKYLPKQSFLMRRHYFNNEETGYFKVQNPMTDPSLMTDMLKGNVTNVLPMIVIGGWINWMFSGFLTTKVPFPLTLRFKPMLQRGVELSYLDAAWVSSASWYFLNVFGLRSIYTLVLGENNAADQSKHMHEQMSGAAMAMPPDPMGERYNIHSQLEHLQSKYIGTGHADTSKYEWLTNQHRDSYSSYLGHPDLLNFLALCENESKARIRFNLMENMLQPCGPPPDKSDE---------------------------------------------------------------------KVVTVGQFRIGLCHGHQIVPWGEPEALALVQRALDVDILVTGHTHRFEAYEHENRFYINPGSATGAYNPLPSFVLMDIQSGTVVTYVYQLLGDEVKVERIEYKKPAGDVENGKKLFVQRCATCHTVEAGGKHKVGPNLSGLIGRKTGQAPGFTYTDANKAKGITWNDETLFIYLENPKKYIPGTKMVFAGLKKPQDRADLIAYLKDATMENDAGEFVDLYCPRKCSTSNRLIHAKDHASIQINIASDTSKVYTICGAIRRMGESDDCIARLAKKDGIVAKNDPFADAFKQDGLVHIRIQQRNGRKTLTTVQGLSSDYDLKKIVRACKKEFACNGTVVEHPEYGEVLQLQGDQRENICQWLTKSGLAKSDQLKVHGFFEARLLQSVAFKKVLEAIKDLLTEATFDCSDNGIQLQAMDNSHVSLVSMTLRSDGFDKYRCDRNISMGLNLNSLYKIMKCAGEKDNITIKAHDDTVIVMIESQNHEKVSDYEMKLINLDQEHLGIPDTQYSSTIRMPSAEFARIVRDLSQFGESMVIACTKEGVKFSSAGDIGTANVKLAQTASADKEDEAVTIEMDEPVSLTFSCKYLNFFTKATSLSAQVQLSMSADVPLVVEYRIQEIGHIRYYLAPKIGYVYAVSGPVVTAENMSGSAMYELVRVGYHELVGEIIRLEGDMATIQVYEETSGVTVGDPVLRTGKPLSVELGPGILGSIFDGIQRPLKDINELTNSIYIPKGVNVPALSRTQAWEYRVGSHITGGDLYGVVHENTLVKHKMIMPPKAKGTVTYMAAPGNYTVDEVILETEFDGQKNKYTMLQVWPVRQPRPCSEKLPANHPLLTGQRVLDSLFPCVQGGTTAIPGAFGCGKTVISQSLSKYSNSDVIVYVGCGERGNEMAEVLGDFPQLSVEIDGKTESIMKRTALVANTSNMPVAAREASIYTGITLSEYFRDMGYNVSMMADSTSRWAEALREISGRLAEMPADSGYPAYLGARLASFYERAGRVKCLGNPDREGSVSIVGAVSPPGGDFSDPVTSATLGIVQVFWGLDKKLAQRKHFPSINWLISYSKYMRALDDFYDKNFQEFVPLRTKVKEILQEEEDLSEIVQLVGKASLAETDKITLEVAKLLKDDFLQQNSYSTYDRFCPFYKTVGMLRNMIAFYDMSRHAVESTAQSNKITWNVIRDSMGNILYQLSSMKFKDPVKDGEAKIKADFDQLHEDMQQAFRNLEDFPSRGAQMLMKSRLAGAQKGHGLLKKKADALQMRFRMILGKIIETKTLMGEVMKEAAFSLAEAKFASGDINQIVLQNVTKAQIKIRTKKDNVAGVTLPVFESYQDGDTYELAGLSKGGQQITKLKKNFQSAVKLLVELASLQTSFVTLDDVIKITNRRVNAIEHVIIPRIERTLAYIISELDELEREEFYRLKKIQDKMPQNEYIERHQKLFGRRLDYEERKRKKEAREPHKRAEKARKLRGIKAKLFNKERRNEKIQMKKKIKAHEEKKVKAVPVYLLDRDQSRAKVLSNMIKQKRKEKAGKWDVPIPKVRAQSDAEVFKVLSSGKTRRKAWKRMVTKVTFVGEGFTRKPPKFERFIRPMALRFKKAHVTHPELKATFCLPIIGVKKNPSSPMFTSLGVITKGTVIEVNISELGLVTQSGKVIWGKYAQVTNNPENDGCINAVLL
Pycnogonum_sp                  RTTGASVRTQNVMAASTIANIVKSSLGPVGLDKMLVDDIGDVTITNDGATILKLLEVEHPAAKVLVELAQLQDQEIGDGTTSVVIIAAELLKNADELVKCKIHPTSIISGYRLACKEACKYIQEKMTMNVDDLGRDCLVNAAKTSMSSKLIGSDSDFFSNMVVDATLAVKDGKGGHKYPIKAVNVLKAHGRSTKESILVYGYAVNCTVASQAMPKKISGAKIACLDFSLQKSKMHLGIQILITDPAKLDAMRERESDITKEKIEKILATGANVVLTTGGIDDLCLKYFVEAGAMAVRRVKKVDLKRIAKATGATFLMTLANLEGEETFEASMLGEAEEVVQERICDDELILIKRTASSIILRGANDFMVDEMERSIHDSLCVVKRVLESKTVVPGGGAVEAALSIYLENFATSLSSREQLAIAEYAKSLLVIPKTLSVNAAKDATDLVAKLRAYHNSSQTHAHLKWVGLDLHEGVVRDNQKAGVLEPTISKIKSLKFATEAAITILRIDDMIKLKDKPSQIRNSNFTAAKAVADAIRTSLGPKGMDKMIQAANGDVTITNDGATILKEMKVIHPAAKMLVELSKAQDVEAGDGTTSVVVLAGSLLDAASKLLQKGIHPTTISEAFQKAAVKSVEILMATPVELSDRDSLLKSASTSLNSKVVSQHSYLLSPIAVDAVMSNVDLNDIKIIKQLGGTVEDTELIHGMVFTQRGPRKIEKAKIGLVQFCLSPPKTDMDNQVVVSDYTQMDRVLKEERAYILNIVKQIKKSGCNVLLIQKSILRDAVNDLALHFLAKMKIMVVKDIEREDIEFVCKSLGCKPVASLDHFLPEVLGTADLVEEGSAKFVKVTGVANPTVSIFVRGSNKLVLEEADRSLHDALCVIRCLVKNKAIIAGGGAPEMELSIHLAVHAQFVGGIDSYCLKAFAEAMEIIPSTLAENAGLNPIATVTELRNKHAQGEKTAGINVRKGSITNILEENVVQPLLVSTSAIKFSSETVRCILKIDDIFDEFGRPFIILRDQGSQKRLTGIDALKSHILAARTVANTLRTSLGPKGLDKMMISSDSDVTVTNDGATILKMMDVEHEIAKLMVQLSQSQDDEIGDGTTGVVVLAGALLEQAEILLDRGIHPIRIADGYELAARHAIEHLDKISDSFPVDKKNEPLIQTAMTTLGSKIINKCHRHMAEIAVNAVMAVADLERKDVDFELIKVEGKVGGKLEETMLVKGVVVDKDFSHPQMPKELRDVKIAILTCPFEPPKPKTKHKLDVTSVEDYKKLRQYEKDKFDEMVKQVKDTGATLAICQWGFDDEANHLLLQRELPAVRWVGGPEIELIAIATGGRIVPRFSELTTDKLGKAGLVRELSFGTTRDKMLVIEECQNSRAVTIFIRGGNKMIVEEAKRSIHDALCVVRNLVKDDRIVYGGGASEISCALSVSEQANKISSLEQYAFRAFADALESIPLSLADNSALSPIETLMDVKSRQKKEKNPWLGIDCANKGTDDMKQQHVIETLLSKKQQISLATQLVKMILKIDDVRAKDIKFGPDVRALMLQGVDILADAVAVTMGPKGRNVILEQSWGSPKITKDGVTVAKGIELKDKFQNIGAKLVQDVANNTNEEAGDGTTCATILARAIAKEGFESISKGANPVEIRNGVMSGVENVIETLKGMSKTVTTPEEIAQVATISANGDGNLISEAMKKVGRDGVITVKDGKTLNDELETIEGMKFDRGYISPYFINQAKGAKVEFQDALVLLCEKKVSGIQTIIPALELANRKPLVIVAEDVDGEALSTLVLNRLKVGLQVAAVKAPGFGDNRKNTLNDIAIATGGILFGDEANLVKLEDVQLADFGEVSEVNITKDDTLLLKGKGRKEDIEKRISQIRDEIELTSSDYEKEKLSERLARLSSGVGVLKVGGSSEVEVNEKKDRVNDALNATRAAVEEGIVPGGGTALLRCLDSLDNVSAKNEDQKKGIEIVKKALKMPCMQIATNAGVDAAVVVQKVGYDAMKAEYVDMIKTGIIDPTKVIRTALQDAAGVASLLSTAEAVIVEIPKYNFKKIAVVPTSKDFTDIVLSKTQRKTPTVVHKHYKISRIRSFYMRKVKYTQQNYHEKLSQIINDFPKLVDIHPFYADLMNVLYDKDHYKLALGQMNTARHLIDNVSKDYVRLLKYADSLYRCKQLKKAALGRMVTIMKRQNQSLQYLEEVRQHLSRLPSIDPNTRTLLICGFPNVGKSSFINKITRADVEVQPYAFTTKSLYVGHTDYKYLRWQVVDTPGILDHSLEERNTIEMQAITALAHLRAAVLYIMDLSEQCGHTIEEQFNLFKSIQPLFANKPLLVVINKTDIIGLDDLTDNGVINVKNEACDRLLAHRVDIKMKTKKRLHVAMPKARDKARPPFIPKLERHLEMELGDDYVLDLKKNYMKYDVMPELWEGHNIADFVDPREHINVIFIGHVDAGKSTIGGHIMYLTGMVDKRTLEKYEREAKEKNRESWYLSWALDTNQEERDKGKTVEVGRAYFETDNKHFTILDAPGHKSFVPNMIGGAAQADLAVLVISARKGEFETGFERGGQTREHAMLAKTAGVRHLVVLINKMDDPTVLWSEDRYNECKEKLIPYLKKCGFNPKTDVNFMPVSGITGAFLCPWYRGPAFIPYIDLPPIDRSQDGPFRMPIIDRYKDMGTVVLGKVESGSTKKGQQLILMPNRTPVEVLSLWSDDIEVTTVKAGENVKSKLKGVEEEDVSPGFVLCDANSPCKTGRIFDAQVVILEHKSIICAGYGAVCHIHTVAEEVSVKALICLIDKKTGDKGKTRPRFVKQDQIVIMRFEICLDTFKEFPQMGRFTLRDEEIRGLMDRKRNIRNMSVIAHVDHGKSTLTDSLVSKAGIIASQKAGETRFTDTRKDEQERCITIKSTAISMYFDLDKKDLTYIGFLINLIDSPGHVDFSSEVTAALRVTDGALVVVDCVSGVCVQTETVLRQAIAERIKPVLFMNKMDRALLELQLDQEDLYQTFQRIVESVNVIIATYSDGPMGDIKVDPSKGSVGFGSGLHGWAFTLKQFAEIYSAKFNIKLMKKIWGENFYNAKTKKWRAFVMFVLDPIYKFDAIMNKKDVTATLLTKLLKGEDKEKEGKPLLKVVMRTWLPAGEALLQMIAIHLPSPVTAQKYRMEILYEGPQDDEAAKTCNPGGPLMMYISKMVPTNDKGRFYAFGRVFSGCVGTGQKVRIMGPSFSPGKKEGLYEKSIQRTILMMGRYVEAIEDVPCGNICGLVGVDQYLVKTGTISTYKDAHNMKVMKFSVSPVVRVAVEPKNPADLPKLVEGMKRLAKSDPMVQCTNEESGEHIIAGAGELHLEICLKDLEEDHACIPLKKSDPVVSYRETVASESSITCLSKSPNKHNRVFMRAAPMAEGIAEDIDEGITPRQDFKLRARHLIDKYEWDATESRKIWCFGPEGTGPNLLVDCTKGVQYLNEIKDSVVAGFQWATKEGVLCEENVRSVRFNIHDVTLHTDAIHRGGGQIIPTTRRVLYASMLTAEPRLMEPIYLCEIQCPENAVGGIYGVLNRRRGHVFEEAQVTGTPMFVVKSYLPVNESFGFTADLRSNTGGQAFPQCVFDHWQILPGDPKPAEVVADTRKRKGLKEGIPPLENFFDKLGSGASQTYPMQCSGLRKNGHVVIKSRPVKIIEMTTSKTGKHGHAKVHLVGLDIFTGKKYEDICPSTHNMPVPNVKRTDFQLVDIE-EDYLNLMNNGELKTDLKVPQDTVLEAMGEEQVIATRTYDLNITYDKYYQTPRLWLFGYDEKRKPLSVDEMYEDFSQDHAKKTVTMETHPHLPGPPMASIHPCRHADVMRKIMQTVTEGGGELGVHMYIIVFLKFVQAVMPTIEYDYMGRRPARCYRYCKNKPYPKSRFCRGVPDSKIRIFDLGRKRARVDEFPLCVHLVSDEYEQLSSEALEAGRICCNKYMVKHCGKDSFHIRIRVHPFHICRINKMLSCAGADRLQTGMRGAFGKPQGTVARVNIGQPIMSVRAKLGHKAQVIEALRRAKFKFPGRQKIFVSKKWGFTKWDQDVYEKMRAEGRLIPDGVTVQYKREHGPLFDDMNLRDDLLRGIYAYGFEKPSAIQQRAIMPCIKGHDVIAQAQSGTGKTATFSISILQLIDPSLVECQALILAPTRELAQQIQKVVLSLGDYMNTHCHACIGGTNVREDMRKLEHIVVGTPGRVFDMMNRGALRPNNIKMFVLDEADEMLSRGFKDQIYDVFKLLQVILLSATMPSDVLEVTKRFMREPIRILVKREELTLEGIKQFYVNVNKEEWKFETLCDLYETLTITQAVIFCNTRRKVEWLTDKLHEKDFTVSAMHGEMDQKERDVIMKEFRSGSSRVLITTDLLARGIDVQQVSLVINFDLPSNRENYIHRIGRGGRFGRKGVAINFITEEDKRTMKDIETFYNTQVDEMPMNVADLIFEKNNEVGVFAKLCNNYCLVGIGGSENFYSVFEGELSETIPVIHASIAGCRIIGRLTVGNRHGLLVPNSTTDQELQHIRNSLPDGVSIRRIEERLSALGNVVACNDYVAVVHPDLDKETEEILADTLKVEVFRQTIADNVLVGTYCSFSNQGGLVHPKTKIEDLEEMSSLLQVPLVAGTVNRGSDVIGAGMVVNDWAAFCGMDTTSTELSVIESVFKLSIAPSIYGSIDIKKAIAALLFGGSRKRMPDGLTRRGDINLLLLGDPGTAKSQLLKFVERVSPIGVYTSGKGSSAAGLTASVIKDPASRTFVIEGGAMVLADGGVVCIDEFDKMKQDDRVAIHEAMEQQTISIAKAGITTTLNTRCSVLAAANSVFGRWDDTKGEENIDFMPTILSRFDMIFLVKDQHCGPRLSLEAAEKLKNNYVNLRNGSKNHEKEAGKQMIIPITVRQLEAVIRISESLAKMQLIPFVTEVHVDEALRLFQASTLDAAMSGSLAGAEGFTTQEDHEIILRIEKQIKRRFAIGSQVSEHSIIQDFVKQKYPEQAVHKVLYFMIRRGEVQHRMQRKMLIRLQKAIDLVTKATEADKNKEYDEAYKLYESGVEYFLHAIKYEAQGDKAKASIRTKCAQYLDRAEKLKKKMQNKLEGAIVMEKPNVQWSDVAGLEGAKEALKEAVILPIKFPHLFTGKRTPWKGILLFGPPGTGKSYLAKAVATEANNSTFFSVSSSDLVSKWLGESEKLVKNLFELAREHKPSIIFIDEIDSLCSSRSDNESESARRIKTEFLVQMQGVGNDAEGILVLGATNIPWVLDAAIRRRFEKRIYIALPEEHARTEMFKLNLGTPNRLLGKNTEGYSGADITIVVRDALMQPVRKVQTATHFKKVRGVSRNNPDVLVDDLLTPCSPGEPGAIEMTWMEVESEKLFEPVVTMKDMMQSLATSKPTVNDKDLQKIQEFTDSFGQEGRKIPVPRHRYGPLKENWMKIFTPIVEYLHLQIRFNLQTRNVEIKSTEETDISSVQKAADFVTAFTQGFEVEDALALIRLDDLFLESFQINDVKSLKGDHLSRAIGRIAGKGGKTKFTIENVTKTRIVLAESKIHILGSYQNIRIARAICNLILGSPPSKVYGIFTPTNQIRLTNVAVVRLKKGGKRFEIACYKNKVVSWRNKVEKDIDEVLQTHTVFVNVSKGQVAKKEDLIKCFGDNQAEICLEILEKGELQVSDKERQTHLDALFKDIATTVAEKCVNPKTNRPYTVTMIETSMKEIHYSVKPNRPAKQQALEVIKKLKMFLTRSEYDRGVNTFSPEGRLFQVEYAIEAIKLGSTAIGIQTSEGIVLAVEKRVTSTLMESSTIEKIVEIDRHIGCAVSGLMADSRTMIDKARVETQNHWFTYNERMSVESVAQSVSNLAIQFGDSDDDAMSRPFGVAILFAEKGPQLYHMDPSGTFVQYDAKAIGSGSEGAQQALQEAYHKSITLKEALKSALTILKQVMEEKLNSTNVEYDRAITVFSPDGHLFQVEYAQEAVKKGSTAVGLCGKDMVVLGVEKKSVAKLQEERTVRKICLLDDHVVMAFAGLTADARILINRARIECQSHKLTVEDPVTLEYITRYIAGLKQKYTQSNGRRPFGISALIAGFDDDGPHLFQTDPSGTYHAWKANSTGRSAKTVREYLEKHFSEETVSTDESTIKLAIKALLEVVQSGGKNLELAVMRYDSRTTIFSPEGRLYQVEYAMEAIGHAGTCLGILANDGIVLAAERRNTNKLLDEVFFSEKIYKLHDDMACSVAGITSDANVLTNELRLIAQRYLLQYGESIPCEQLVSWLCDIKQAYTQYGGKRPFGVSLLYMGWDKHFGYQLYQSDPSGNYGGWKATCIGNNSSAAISILKQEYKDGDIKLKDACSLAIKVLNKTLDMTKLTSDKVEMTMLTRYSFSLTTFSPSGKLVQIEYALAAVAAGAPSIGIKASNGVVIATEKKHKSILYEEHSVHKVEMITKHIGMVYSGMGPDFRLLIKQARKLAQQYYLMYHELIPTSQLVQKVANIMQEYTQSGGVRPFGVSLLICGWRPYLFQCDPSGAYFAWKATAMGKNFINGKTFLEKRYSEDLELEDAIHTAILTLKEGFEGQMTADNIEIGVCGFNRLAPAEVKDAGFDRHITIFSPEGRLYQVEYAFKAINQGGLTSIALKGDDTAVCVTQKKVPDKLLDPSTITHLYKITERIGCVMTGLIADSKSQVQRARYESANWKYKYGYDIPVDMLCKRIADISQVYTQNAEMRPLGCSMIFIAYDDLGPQVYKADPAGYYCGYKATSAGVKQTEANSYLEKKLKKREAIQLAITSLSSVLSADFKPSEIEVGVVSKENPEFRILTESEMGVNDELACVYSALILLDDDVAVTAEKISTILKAAKVEVEPYWPGLFSKCLDGVDIKLMITNIGSSKVSKDTLYECVNGLLDYSKQRKFQETVELQVALKNYDPQKDKRFSGTVKLKHIPRPKFRVCILGDQQHCDEAKANDIPCMDVEALKKLNKNKKLVKQLAKKYDAFLASDSLIKQIPRLLGPGLNKAGKFPSLLTHNDSMKVDEVKATIKFQMKKVLCLAVAVGHVNMPIDELAQNVHLALNFLVSLLKKNWQNVRSLHIKSTMGQPQRLYMPPKFDPNEIKIVYMRAVGGEIGATSSLAPKIGPLGLSPKKVGDDIAKATADWKGLKITVKLTVQNRQATITVVPSAGSLVIRALKEPPRDRKKVKHVKHNGNLSLDEVINIARQMQRSMSRKLEGTVKQILGTCQSVGCTVEGINPHDVIDKIKDGEIEVPMGAYKYMQELWRKKQSDVMRFLFRVRCWQYRQLSSIHRAPRPTRPEKARRLGYKAKQGYVIYRIRLRRGGRKKPVPKGCTYGKPKNQGVNKLKPARNLQSVAEERIGRKCGALRVINSYWIGTDSTFKYYEVILVDPFHKAIRHDPKIQWICNPVHKHRELRGLTSAGRKSRGLGKGHKYTKTIGGSRKACWKRRNTLSLRKRRMTRYSSEPENATKSCKAKGSNLRVHFKNTRETAQAIKKMGLRRAQQYLKNVISKKEIVPFRRFNGGVGRKAQVKQFKTQGRWPKKSAEFMLQLLRNAESNADYKGLDTDKLVIEHIQVNRAAKMRRRTYRAHGRINPYMSSPSHIEVILSEKDMKLELCAYSGYKIYPGHGKKAVKIDGKVYQFLNSKCERSHGMKKNPRKVCWTVLYRRKHKKGQEEELTKKRTRKTTKYQRAIVGASLSDIMAKRNQKPEVRKAQREQAIRKKIRTSVIFHRPKTYKASRHPKYPRKSVPRKSKLDHYSVIKHPLTTESAMKKIEDNNTLVFIVDIKANKPQIKSAVKKLYDIDVQKVNTLIRPDGQKKAYVHLASDFDALDVANKIGIISHRKFSAPRHGSIGFTPKKRSKRHRGKVKAFPKDDPSKPVHLTAFIGYKAGMTHIVREVDKPGSKTNKKEIVEGVTILETPPMMIVGVVGYIETPHGLRTFKTVWAEHISEECKRRFYKNYKAKRKAFTKNAKKWQDDVGKKEFEKDFKQIIKYCKVIRVIGHTQMKLMKKRQKKAHIMEIQLNGGSIADKVNWAREHMEQQHSIHQVFSKDEMIDIIGVTKGKGFKGVTSRWHCKKLPRKTHKGLRKVACIGAWHPSRVQFTVARAGQKGYHHRTELNKKIYRIGHGKVIKNNAATEYDVTDKSVTPMGGFPHYGEVNCDFIMLKGCVMGPKKRVITLRKSLLVHTKRTALEKINLKFIDTSSKFGHGRFQTHAEKKSAINEVVTREYTIHVHKRLHGIGFKKRAPRAIKEIRKFAEKQMGTEDVRIDTRLNKHVWSKGVRNVPFRIRVRLSRRRNEDEDSTNKLYTLVTFVPVATFKGLQTENVDIVKKRVKKFTRHQSDRYIKVKSNWRKPRGIDNRVRRRFKGQRKMPNIGYGSDKRTKHMLPNGFRKVLVHNVKELEMLLMQNKRFCGEVAHGVSSRKRKDIVERAQQLAIRLTNANARLRSEENEKGYKLTKPSRNKGKHTKFIRDLVREVSGFAPYEKRTMELLKVSRDKRALKFLKKRLGTHLRAKRKRDELGQVLAQMRKMTKGTSSFGKRHNKTHTLCRRCGRSSYHIQKHSCAQCGYPQKKTRHYNWSVKGKRRKTTGTGRCRYLKTVWKRFKNGFREGXXXXXXXXXXXXXXXXXXXXXXXXXXXXXXXXXXXXXXXXXXXXXXXXXXXDKATWKANYFTRLVKLFDEFPKCFIVGVDNVGSKQMQQIRIALRGHAEILMGKNTMIRKAIRGHLDNNPFLEKMLPHIKGNVGFVFTKEELTEVRKQILDNKVKAPARAGALAPVDVTIPAQNTGLGPEKTSFFQALSIPTKISKGTIEILNPVQLIKVGSRVGASEATLLNMLNISPFTYGLKIEQVYDSGTVFSPSILDISDDDLRKSFMGGVANIASVCLEIGYPTIASVPHSVINGFKNCLAVACETDFKEAEMAKEYLKDPSKFVDPFTRKDWYDVKAPSMFNVRQVGKTLVNRTQGTKIASDSLKGRVFEVSLADLVNDEISFRKFKLIAEEVQGKNVLTNFHGMDLTTDKLRSMVKKWLTLIEANIDVRTTDGYLLRLFCIGFTKRQVKRTCYAQSKQIRNVRKKMIEVMVRDVSSNDLKEVVNKLIPDSMGKDIEKACESTFPLQDVYIRKVKVLKKPKFDLGRLMDLHGPDSFEPRVQESVMLMPKKTRIAIYEHLFKEGVMVAKQDFHAPKHISNLHVIKALQSLKSRGLVKEQFAWRHYYWCLTNEGIEYLRNMLHLPPEIVPSTLKERAFQKQPTVFLNAKKDLRHVKNVGLGFKTPREATIGSYIDKKCPFTGDVSIRGRILTGVVQKMKMQRTIVIRRDYLHYIRKYNRFEKRHKNMSVHLSPCFRDVMTGDIVTVGECRPLSKTVRFNVLKVTKHHIRITLTSRNVRSLEKVCADLIKGAKSKDLRVKGPIRMPTKILRITTRKTPCGEGSKTWDRFQMRIHKRIIDLHSPSETVKQITSIGIEPGVEVEVTIADTIRTRKFMSNRLLCRRQMVVDVLHPGRSSVPKTEIRDKLARMYKTTADVIFCFGYRTQFGGGRSSGFALIYDTMDYAKKFEPKYRLARHGLYERKQRKERKNRQKKVRGTKKVRDKLNNLVLFDKGTYDKFLKEVPLYKLITPSVVSERLKIRGSLARKALDELHAKGLIKRVAKHHSQLIYTRVTRGPKKHLKRLTAPKSWMLDKLTGVYAPRPSTGPHKLRESLPLIIFLRNRLKYALTGSEVKKIVMQRLIKVDGKVRTDAKYPAGFMDVISIEKTGEYFRLLYDVKGRFTIHKITPEEGKYKLCRVKRVQTGPKGIPFLVTYDGRTIRYPDPLIKVNDTIQLDIGTGKILDFIKFDSGNLCMITGGHNLGRVGTVTNRERHPGSFDIVHVKDSVGHVFATRLNNVFIIGKSSKAYVSLPKGKGVKLTIAEERDRRMKLNVSYPATGCQKLIEFDDEKKVRVFYEKRMGQEVEADSLGDEWKGYVVRISGGNDKQGFPMKQGVLTPGRVRLLLSKGHSCYRPRRTGERKRKSVRGCIVDSNLSVLALVVVKKGEQEIPGLTDTTIPKRLGPKRASKIRKLFNLSKEDDVRQYVVKRPLAQKEGKKTKAPKIQRLVTPVVLQRKRDEFEKEISKAILDLEMNSDLKAQLRELHITGAREKKAIVIMVPVPQLRSYQKIQARLIRELEKKFSGKHVVLIAQRGILPKPTRKSKQKRPRSRTLTAVHDNILDDLVYPAEIVGKRIRIRLDGSRLIKVHLDKNQQTNIEHKTDTFSAVYKKLTDKEVTFEFMGISRDHWHKRRKTGGKRKPLRKKRKFELGRPAANTKLGPSRIHTVRTRGGNKKYRALRLDQGNFSWGSESCTRRTRIIDVVYNASNNELVRTKTLVKNAIVVIDATPFRQWYEAHYAMPLGRKKGAKLKRSKKIDRKYKRRQKTAKVEQGLEEQFITGRCIACIASRPGQCGRSDGYIIEGKELEFYLKKIKAKKLCDIVCDILLEESNVQPVSTPVTVCGDIHGQFYDLEELFRTGGQVPDTNYIFMGDFVDRGYYSLEALTRLLTLKARWPNKITLLRGNHESRQITQVYGFYDECQTKYGNSNAWRYCCKVFDLLTIAAIIDHQVLCVHGGLSPDIKTLDQIRIIERNQEIPNKGAFCDLVWSDPEIESWSISPRGAGWLFGANVTHEFMHINNLELICRAHQLVNEGWKYMFNDRLVTVWSAPNYCYRCGNVAGKLIAVIGDEDTCVGFLLGGIGEINKSRQPNFLVVDKNTSIGEIEESFKNFVKRGDIDIILISQNIAEMIRYLVDSHPIPTVLEIPSKDAPYDASKDSILKIAKGMFNAEDDSNIRSWVFLPIVVVTFLVGIVRHYVSMLISTQKDSQVMIRSRMLRQNRMFIPKNAFLMRKNFLNNDETGYFKTQNPMTDPSMMTDMLKGNLTNVLPMIVIGGWINWTFSGFVTTKVPFPLTLRFKPMLQRGIELMSLDASWVSSASWYFLNVFGLRSIYSLVLGENNAADQMQPMQEQMSGAAMAMPPDPXXXXXXXXXXXXXXXXXXXXXXXXXXXXXXXXXXXXXXXXXXXXXXXXXXXXXXXXXXXXXXXXXXXXXXXXXXXXXXXXXXXXXLVLVLGDLHIPHRCNNLPGKFKKLLIPGRIQHILCTGNLCTKESYDYLKTLASDVHIVRGDFDESYPEQKVVTVGQFRIGLCHGHQIVPWGDAESLAIVQRQLDVDILISGHTHKFEAYEHENKFYINPGSATGAFHSLPSFVLMDIQSSTVVTYVYQLIGNEVKVEKIEYKKPNGNVEKGKKLFIQRCQQCHTVEKGGKHKVGPNLNGLFGRKTGQAAGFSYTDYNKNKGITWGKDTLFIYLENPKKYIPGTKMVFAGLKKKNDRADLIAYLEEATXXXXXXXXXXXXXXXXXXXXXXXXXXXXXXXXXXXXXXXXXXXXXXXXXXXXXXXXXXXXXXXXXXXXXXXXXDPFADANQQEASIHIRIQQRNGRKTLTTIQGLPDSYDKKKIIKHCKKEFACNGTVVQHPEYGEVLQLQGDQRNNICEFLTKIGIAKPDQLKVHGFFEARLTQGSILKKVLDATKDLVGEAIWDCAATGMSLQAMDTAHVSLVSLNLRSDGFDQFRCDRNISLGMNLASMGKILKCAGNDDVITIKAQDDEVTFIFESPNQEKLSDYQLKLMNIDSEHLGIPDTDYDCIIKMSSSEFQRICRDLSQLGDSVLICCTKDGVRFSCSGDTGSGNITLRQTCSVDKKEEEVVIEMKEPIALTFALRYLNSFTKATPLSTTVSLSMSPDVPLVVEYKVEDIGYVRYYLAPKIGYVFAVSGPVVTAEHMAGAAMYELVRVGHFELVGEIIRLEGDMATIQVYEDTSGVTVGDPVLRTGKPLSVELGPGIMGSIFDGIQRPLKDINELTQSIYIPKGINTPALSRDESWEFKVGYHITGGDIYGVIPENTLIKHKIILPPRCKGTITYLAEPGNYNINDVILETEFDGEKSKYTMLQVWPVRQMRPCTEKLAANYPLLTGQRVLDALFPCVQGGTTAIPGAFGCGKTVISQSLSKYSNSDVIVYVGCGERGNEMSEVLRDFPELNVEIEGNVESIMKRTALVANTSNMPVAAREASIYTGITLSEYFRDMGYNVSMMADSTSRWAEALREISGRLAEMPADSGYPAYLGARLASFYERAGRVKCLGNPEREGSVSIVGAVSPPGGDFSDPVTSATLGIVQVFWGLDKKLAQRKHFPSINWLISYSKYMRALEEFYDKNYPEFIPLRTKCREILQEEEDLSEIVQLVGKASLAESDKITLEVAKLIKDDFLQQNGYTPYDRFCPFYKTVTMLRNMIYFYDLARHAVETTAQSNKITWTVIRESLGDIMYQLSSMKFKDPVKEGEKSIKNDLDELYENMTTAFRNLEDFPSRMALMIMKGRLKAAQKGHSLLKKKADALQLRFRMILKKIIDTKILMGEVMKEAAFSLAEAKFATGDFNQVVLQNVAKAQIKVYSRRDNVAGVNLPVFEHYQDGDSYELAGLARGGQQLAKLKKNYAKAVELLVELASLQTSFITLDEVIKVTNRRVNAIEHVIIPKIERTLSYIATELDEREREEFYRLKKIQEKMPQNEHIELHRKRHGYRLDYHERKRKKEGREPHERSKKAKKLRGLKAKMYNKQRFSEKVQMKKTIKMHEERLTKAIPAYLLDREQSRAKVLSNMIKQKRKEKAGKWDVPLPKVKGVSESEVFKVIKTGKRQKKSWKRMVTKVTYVGEGFTRKPPKFERFIRPMGLRFKKAHVTHPELKATFCLPIIGVKKNPSSPMYTQLGVITKGTIIEVNVSELGLVTQAGKVVWGKYAQVTNHPENDGCINAVLL
Lottia_gigantea                RTTGQSVRTQNVLAACSIANIVKSSLGPVGLDKMLVDDIGDVTITNDGATILKLLEVEHPAAKVLVELAELQDQEVGDGTTSVVIIASELLKNADELVKAKIHPTSIISGYRLACKEAVRYIQEHLVINVDDLGRDCIVNAAKTSMSSKIIGPDSEFFSNMVVDAATAVKDGKGGYRYPIKAVNILKAHGKSSRESRLVQGYALNCTVASQAMPKRIANPKIACLDFNLQKSKMHLGVQVLIEDPTKLDGVRQREMDITKERIEKILKAGANVILTTGGIDDLCLKYFVEAGAMAVRRCKKADLKRIAKATGAQFLMTLCNLEGEEVFDASMLGQAEEVLQERICDDELLLIKRSAASLILRGANDFMLDEMERSLHDALCVVKRVLESKSVVAGGGAVEAALSIYLENFATSLSSREQLAIAEFARSLLVIPKQLAVNAAQDATDLVAKLRAFHNKSQTDNELRWVGLDLFEGVVRDNKKAGVLEPSISKIKSLKFATEAAITILRIDDLIKLKDKPTQIRYSNLTAAKAVADAIRTSLGPRGMDKMIQAANGDVTITNDGATILKQMQVLHPAAKMLVELSKAQDVEAGDGTTSVVVLAGSLLDYSAKLLGKGIHPTTISESFQKASAKAVEILMVTPLQLSDRESLLKSASTSLNSKVVSQYSNIFSPIAVDAVMRNVDLKDIKMIKKLGGTVEDTELIDGLVFNQKGPSKIEKAKIGLVQFCISAPKTDMENQVIVSDYTQMDRVLKEERNYILNIVKQIKKAGCTVLLIQKSILRDAVSDLALHFLAKMKIMVVKDIEREDIEFVCKTLACRPIASLDHFVAENLGSADLVEEGTDKIVKITGIANPTVTVLLRGSNKLVLEEADRSLHDALCVIRCLVKKKALIAGGGAPEIELSIRLMEYANTLAGMEQYCFRAFAEALEVIPFTLAENAGLNPIAAVTELRNRHAEGEKTAGINVRKGAITNILEENVVQPMLVSTSAISLAAECVRCILKIDDIFDEYGRPFIILRDQENKTRLTGIEAHKSHILAAKSVASVLKTSLGPKGLDKMLVSPDGDLTITNDGATILGQMDVDHQIAKLMVQLSRSQDDEIGDGTTGVVVLAGALLEQAEQLLDRGIHPIRIADGYEMAARVAVETLDKISDKFDVDLKKEPLIRLAMTTLGSKIINRCHRQMAEIAVDAILAVADLNRKDVDFELIKVEGKVGGKLEDTMLVKGVVIDKDMSHPQMPKTVKDAKMAILTCPFEPPKPKTKHKLDVTSVEDYHNLREYELNKFESMVQQVKDKGANLVICQWGFDDEANHLLLQRELPAVRWVGGPEIELIAIATGGRIVPRFEELTKEKLGHAGIVRELTFGTTKERMLVIEECKNSRAVTIFIRGGNKMIVDEAKRSLHDALCVIRNLVRDNRVVYGGGAPEIACSLAVAAAADKISTLEQYAVRAFSEALESIPLALAENSGHAPIHTLAEVKSRQVKEKNGRLGIDCLHKGTNDMKDQQVIETLMAKKQQLLLATQLVRMILKIDDVRAKDLKFGADARSQMLHGVDTLADAVAVTMGPKGRNVIIEQSWGSPKITKDGVTVAKSIELKDKFQNIGAKLVQDVANNTNEEAGDGTTSATVLARSIAKEGFDSIIKGANPIEIRRGVMIAVDKCVDELKKMSKNVTTPEEIAQVATISANGDGELISSAMKRVGRDGVITVKDGKTLKDELETIEGLKFDRGYISPYFMNKAKGAKCEYQDALVLFSEKKISSVQSIVPALELANRKPLVIIAEDVDSEALSTLVLNRLKVGLQVCAVKAPGFGDNRKNTLLDMAIASGGQVFGDEASMYKVEDVQMQDFGNVGEIIISKDDTLIMKGKGEKDEIEKRMTQIRDEIEMSTSEYEKEKLNERLAKLSNGVAVLKVGGTSEVEVNEKKDRINDALNATRAAVEEGIVPGGGTALLRCTQALNELKADNDDIQRGINIVLKALRVPCLTIAKNSGVDPHAVVEKVGYDAMKGEYDNLISRGIIDPTKVVRTALVDAAGVASLLTTAETVVVEIPKYNFKKITVVPTAKDFIDIILSKTQRKTPTVVHRGYKISRIRGFYTRKVKFCQQSYHDKLTQIITDFPKLEDIHPFYADLMNVLYDKDHYKLALGQMNTARHLIDSVAKDYVRLLKYGDSLYRCKQLKRAALGRMCTIMRRQKQSLEYLEEVRQHLSRLPSIDPNNRTLLITGFPNVGKSSFINKITRADVEVQPYAFTTKSLYVGHTDYKYLRWQVIDTPGLLDHSLEERNTIEMQAITALAHIRAAVLFIMDISEQCGHNLEQQMSLFKNIKPLFANKPLIVVLNKIDILTLDELTEMGVSEVRNEACDRLLLQRVESKIRSKKRLRVAMPSKRDVDRPAFIPKLEKDIELEMGDDYSLDLRKTWEKYDVIPEVYKGHNVADFIDPXXXXXXXXXXXXXXXXXXXXXXXXXXXXXXXXXXXXXXXXXXXXXXXXXXXXXXXXXXXXXXXXXXXXXXXXXXXXXXXXXXXXXXXXXXXXXXXXXXXXXXXXXXXXXXXXXXXXXXXXXXXXXXXXXXXXXXXXXXXXXXXXXXXXXXXXXXXXXXXXXXXXXXXXXXXXXXXXXXXXXXXXXXXXXXXXXXXXXXXXXXXXXXXXXXXXXXXXXXXXXXXXXXXXXXXXXXXXXXXXXXXXXXXXXXXXXXXXXXXXXXXXXXXXXXXXXXXXXXXXXXXXXXXXXXXXXXXXXXXXXXXXXXXXXXXXXXXXXXXXXXXXXXXXXXXXXXXXXXXXXXXXXXXXXXXXXXXXXXXXXXXXXXXXXXXXXXXXXXXXXXXXXXXXXXXXXXXXXXXXEIREIMDKKLNIRNMSVIAHVDHGKSTLTDSLVSKAGIIAGSKAGETRFTDTRKDEQERCITIKSTAISLFYNLNEDDKQYIGFLINLIDSPGHVDFSSEVTAALRVTDGALVVVDCVSGVCVQTETVLRQAIAERIKPVVLMNKMDLALLTLQLDKDTLYHTFQKIIEDVNVIVNTYGEGPMGDIEVDPRNGTVGFGSGLHGWAFTLKDFAKIYAAKLKIKLIKKMWGNQFYNNKTKKWRGFIFFVLNPIYQFDACMKTNEDALALVEKLLTADDKQLVEKPLLKTIMRKWLPAGDAMLQMIVIHLPSPVTAQKYRCEMLYEGPIDDDAAKNCDPEGELLMYISKMVPTNDKGRFYAFGRVFGGTVSTGQKVKIMGPNYDPEKKTDCYEKSIQRTVLMMGRYVEAIEDVPCGNICGLVGVDSYIVKTGTISTFSKAHNMKVMKFSVSPVVRVAVDCKNPSDLPKLVEGLKRLAKSDPMVQCSTEESGEHIIAGAGELHLEICLKDLEEDHACIPLKKSDPVVSYRETVSEESSQTCLSKSANKHNRLFVKAAPLPEGLAQAIDDGITPRQEFKSRAKVLAEEYNMDVGEARKIWAFGPEGTGPNFLMDCTKAVQYLNEIKDSCVAGFNWATKEGVMCEENMRSVRFNIQDVTLHTDAIHRGGGQIIPTARRVFYASFLTAAPKILEPVYLVEIMVPDAAMGGVFSTLNRRRGVVFENNPVGNTPQTLVKAHLPVNESFGFTGDLRSQTQGKAFPQCVFDHWQILPGDPKPYVVVSSARKRKGLKEGVPLLENFLDKMXXXXXXXXXXXXXXXXXXXXXXXXXXXXXXXXXXXXXXXXXXXXXXXXXXXXXXXXXXXXXXXXXXXXXXXXXXXXXXXXXXXXXXXXXXXXXXXXXXXXXXXXXXXXXXXXXXXXXXXXXXXXXXXXXXXXXXXXXXXXXXXXXXXXXXXXXXXXXXXXXXXXXXXXXXXXXXXXXXXXXXXXXXXXXXXXXXXXXXXXXXXXXXXXXXXXXXXXXXXXXXXXXXXXXXXXMGRRPARCYRYCKNKPYPKSRFCRGVPDPKIRIFDLGRKKARVDEFANCVHLVSDEYEQLSSEALEAGRICANKYLVKHVGKDAFHLRVRVHPFHVVRINKMLSCAGADRLQTGMRGAYGKPQGTVARVNIGQPIMSVRSRDNAEGHVIEALRRAKFKYPGRQKIYVSKKWGFTKWSREEYDVKFKAGQLVPDGVTVQYKPDHGPLFDDMYLREELLRGIYAYGFEKPSAIQQRAILPCIKGCDVIAQAQSGTGKTATFSIAILQKLDLKDQNIQALVLAPTRELAQQIQKVVLALGDYMGAQCHACIGGTLVREDQRRFEHVVVGTPGRVNDMIARKSMRTGGIKMFVLDEADEMLSRGFKEQIYDVFRKMQVVLLSATMPTDVLEVTERFMRDPIRILVKKEELTLEGIRQFYIHVDKEEWKLETLCDLYETLTITQAVIFCNTRRKVDWLTSKMTSRDFTVSALHGEMDQKERDVIMKEFRSGSSRVLITTDLLARGIDVQQVSLVINYDLPTNRENYIHRIGRGGRFGRKGVAINFVTADDTRILRDIETFYNTTVEEMPMNVADLLFEGNNEIGVFSKLTNAYCLVAIGGSENFYSIFEGELGETIPVVHASIAGCRIVGRLTVGNRHGLLVPNTTTDQELQHIRNSLPDSVKLQRVEERLSALGNVIACNDYCALVHPDLDRETEEIITDVLKVEVFRHTVASNALVGSYCTFSNQGGLVHPKTNMADQDELSSLLQVPLVAGTVNRGSDVLGGGLVVNDWIAFCGLDTTATEVSVIESVFKIXXXXXXXXXXXXXXXXXXXXXXXXXXXXXXXXXXXXXXXXXXXXXXXXXXXXXXXXXXXXXXXXXXXXXXXXXXXXXXXXXXXXXXXXXXXXXXXXXXXXXXXXXXXXXXXXXXXXXXXXXXXXXXXXXXXXXXXXXXXXXXXXXXXXXXXXXXXXXXXXXXXXXXXXXXXXXXXXXXXXXXXXXXXXXXXXXXXXXXXXXXXXXXXXXXXXXXXXXXXXXXXXXXXXXXXXXXXXXXXXXXXXXXXXXXXXXXXXXXXXXXXXXXXXXXXXXXXXXXXXXXXXXXXXXXXXXXXXXXXXXXXXXXXXXXXXXXXXXXXXXXXXXXXXXXXXXXXXXXXXXXXXXXXXXXXXXXXXXXXXXXXXXXXXXXXXXXXXXXXXXXXXXXXXXXXXXXXXXXXXXXXXXXXXXXXXXXXXXXXXXXXXXXXXXXXXXXXXXXXXXXXXXXXXXXXXXXXXXXXXXXXXXXXXXXXXXXXXXXXXXXXXXXXXXXXXXXXXXXXXXXXXXXXXXXXXXXXXXXXXXXXXXXXXXXXXXXXXXXXXXXXXXXXXXXXXXXXXXXXXXXXXXXXXXXXXXXXXXXXXXXXXXXXXXXXXXXXXXXXXXXXXXXXXXXXXXXXXXXXXXXXXXXXXXXXXXXXXXXXXXXXXXXXXXXXXXXXXXXXXXXXXXXXXXXXXXXXXXXXXXXXXXXXXXXXXXXXXXXXXXXXXXXXXXXXXXXXXXXXXXXXXXXXXXXXXXXXXXXXRKIPIPSNRYTPLKKNWLKIFTPIVEHLHLQIRFNLKTRNVEIKTCKATDIRALQKAADFVQAFVYGFEVEDSLALVRLDELYLETFDVTDVKPLKGNHLSRAIGRIAGHNGKTRFTIENVTKTRIILAASKVHILGSFQNINMARAICNLILGSPPSKVYGXXXXXXXXXXXXXXXXXXXXXXXXXXXXXXXXXXXXXXXXXXXXXXXXXXXXXXXXXXXXXXXXXXXXXXXXXXXXXXXXXXXXXXXXXXXXXXXXXXXXXXXXXXXXXXXXXXXXXXXXXXXXXXXXXXXXXXXXXXXXXXXXXXXXXXXXXXXXXXXMFLTRSEYDRGVNTFSPEGRLFQVEYAIEAIKLGSTAIGIQSSEGTVLAVEKRVTSPLIEPSSIEKIMEVDSHIGCAMSGLIADSRTLIDRARVEAQNHWFTYNEKMSVESVTQAVSNLALAFGDDDAEAMSRPFGVALLFAEKGPQLYHMDPSGTFIQYDAKAIGSGSEGAQQALQEVFHKSITLKEACKSALTILKQVMEEKLNSTNVEXXXXXXXXXXXXXXXXXXXXXXXXXXXXXXXXXXXXXXXXXXXXXXXXXXXXXXXXXXXXXXXXXXXXXXXXXXXXXXXXXXXXXXXXXXXXXXXXXXXXXXXXXXXXXXXXXXXXXXXXXXXXXXXXXXXXXXXXXXXXXXXXXXXXXXXXXXXXXXXXXXXXXXXXXXXXXXXXXXXXXXXXXXXXXXXXXXXXXXXXXXXXXXXXRYDSRTTIFSPEGRLYQVEYAMEAIGHAGTCLGILANDGVLLAAERRNTNKLLDEVSFSEKIYKLYDDMACSVAGITADANVLTHDLRLIAQRYTLQYQEPIPCEQIVSSLCDIKQAYTQFGGKRPFGVSLLYMGWDRHYGFQLYQSDPSGNYGGWKATCIGNNSANAVSMLKQEYKEGETNLQEALALSIKVLSKTLDMTKLTPDKVELATLTRYSFSLTTFSPSGKLVQIEYALAAVSAGAPSVGIKAVNGVVLATEKKQKSLLYDDQSIHKIDYITKNIGMVYSGMGPDYRVLLTRARKLAQSYYLTYQEQIPTAQLVQRVATVMQEFTQSGGVRPFGVSLLMAGWKPYLYQCDPSGAYFAWKATAMGKNHINGKTFLEKRYSEKLELEDAVHTAILTLKESFEGQMTEDNIEIGICGFRRLTTSEVKDAGFDRYITVFSPEGRLYQVEYAFKAVNQGGLTSVAVRGKDSAVVVTQKKVPDKLLDADTVTHLFQLTEKIGCVMTGMIADSKSQVQRARYEAAKWKYSYGYEIPVDMLVKRMADINQVYTQSAEMRPLGCCMILIGYDDEGPLVFRTDPAGYYYGFKATSAGVKQLEANSFLEKKIKKKDTVETAITCLSTVLSADFKAAEIEVGVVSKDHSRFKVLSEEEXXXXXXXXXXXXXXXXXXXXXXXXXXXXXXXXXXXXXXXXXXXXXXXXXXXXXXXXXXXXXXXXXSKINRDNLRESINNIFEFSKKRKFTESIELQIGLKNYDPQKDKRFSGTIQLRHIPKPKMKVCILGDQIHCDQAKANEMPCMDADMLKKLNKDKKLVKKLAKRYDAFLASETLIKQIPRLLGPGLNKAGKFPTPISHNQSLKVQQVKGTIKFQMKKVLCLSVCIGHINMSQEEVYTNVNLAINFLVSLLKKNWQNVRTLHIKSSMGPVQRIYMPPKFDPNAIHEIFVRAVGGEVPATASLAPKIGPMGLSPKKIGDDIAKGTTDWKGLKITVKLTIQNRQAKVSVVPSAAALIIKALKEPPRDRKKVKNVKHSGNLTLEDIINIARQMKRSMAKSLAGTVKEILGTAQSVGCTIEKSHPHTVIENIDAGEVEIPMGAYKYMQEIYRKKQSDVMRFLLRVRCWQYRQLNPVHRCPRPTRPEKARQLGYKATQGFVIYRVRVRRGSRKKPVRKGITYGKPKRHCVVRIKFARNLRSVAEEKVGRRCGNLRVLNSYWVCQDSVFKFYEVILVDPFHKSIRRNPRIQWICNPVMKHRELRGLTNAGKNSRGLGKGHKFNKTTGGSRWANWKKHNFEQMHRKRMVRYSSEPDNPSKCAKARGAYLRTSFKNMRETANTIKGMPLARATRYLKNVMEKKEIVPFNRFNGAVSNHAQAKNFKMQGRWPKKSADFLLQLLKNAESNAEFKGLDTDHLAITHMQINMAPKIRRRLYRAHGRINPFMSTPCHIELILTEKEMKIELCSYSGLKIYPGHGKRVVLKDGKTFNFLNSKCCASHFMKRNPREIRWTVLYRRKYKKGNLETITKKRNRKTVKHERGIAGATLSDILAKRNQPPEVRAAQREQAIRRKVRTTPSFKRPKTMKLPRAPKYVRSLTTKRG-LDKYKIVKYPLTTETAMKKIEDNNTLVFIVDRRANKYTISNAVKALYSIEVAKINTLIRPDGEKKAYVRLPSDYDGLEIASKIGIISHRKFSAPRHGSKGFLPKKRSRRHRGRIHAFPKDDPKKPVHMTAFIGYKAGMTHIVRDVDRPGSKLNKKEVVEGVSIIETPPMMVVGVTGYIETPEGLKTFKTLWAEHLSEECRRRFYKNSRSKKKAFTKNAKKWKDEAGKKLIESDFNKMKKYCKVIRVIAHTQTKLLRHLQKKAHIVEVQLNGGSIADKVDWARQQLEKPVPVNQVFEQDEVLDIIGVTKGKGFKGVTARWHTKKLPRKTHKGLRKVACIGAWHPSRVQFSVARAGQKGYHHRTELNKKIYRIGLGKVVKNNASTDFDPVTKAITPMGGFHHYGEVNNDFLMIKGAVVGTRKRVITLRKSLLTTFRRKHTEKVVLKMIDTTSKLGHGRFQTHEEKKSVANEVITREVTIHIHKYIHSVSCKRKAPRAIKEIRKFALKMMKTPDVRIDTRLNKYIWSKGVRSVPFRIRVRLARKRNEDEDSIHRLYTLVSYVPCTDFSGKESITVEIVKKRTKKFYRHESDRYMRVKRNWRRPKGIDNRVRRRFKGQYLMPKIGYGSNKKTRHVCPDGFKKILVHNKRELEILMMQNGTFSAEIAHGVSSKKRKTIVERAQQLAIKVTNPNARLRSQEDEKGHKVTKANRMKGKKNKFVRDLVREIVGLSPYEKRCQELLRVSREKRALKFCKKRLGAHTRGKKKREEMQAILNAIRKXXXXXXXXXXXXXXXXXXXXXXXXXXXXXXXXXXXXXXXXXXXXXXXXXXXXXXXXXXXXXXXXXXXXXXXXXXXXXXXXXMAAHKSLKTKLKLARKMKQNRPVPQWVRLRTGNTIRYNAKRRHWRRTKLKMDKQTWKSKYFMRLVQLFDEYPKCFIVNADNVGSKQMQSIRIALRGKGVVLMGKNTMMRKAIRGHLENNSTLEKILPKIRGNIGFVFTKDDLVEVRAILLESKVKAPAKAGALAPLDVKVPAQQTALGPEKTSFFQALQIPTKITKGTIEILNEVNLIKEGEKVGASEATLLNMLNISPFSYGLVIENVYDSGTIFSPKILDITDNYLKGVFMEGVRNIASISLVVGYPTAASVPHSIANGFKNLLALACVTEFTEAEKTKEYLKDPSKFADPFSKKEWYDVKAPSMFAVRKIGVTPVTRSSGTKLAADSLKGRMFKVSLADLQNDEVTFRKFRLLAEDVQGKNLLTTFQGMELTRDKLCSVVKKWQTMIDSRVDVKTTDGYHLRVFCIGFTKKQVKKTCYAQRQHVFKIRKKMEDIMRKEITAIDMREVINKLIPDSIGKDIEKACQGIFPIHEVYIRKVKILKKPKLDFAKLLEMHGPDGYEPPVADAVMLMPKKNRVTIYEYLFKEGVMVAKKDFFAPRHVPNLHVIKALTSLKSRGLVREQFAWRHYYWYLTNEGIQFLRDFLHLPPEIVPATLKXXXXXXXXXXXXXXXXXXXXXXXXXXXXXXXXXXXXXXXXXXXXXXXXXXXXXXXXXXXXXXXXXXXXXXXXXXXXXXXXXXXXXXXXXXXXXXXXXXXXXXXXXXXXXXXXXXXXXXXXXXXXXXXXXXXXXXXXXXXXXXXXXXXXXXXXXXXXXXXXXXXXXXXXXXXXXXXXXXXXXXXXXXXXXXXXXXXXXXXXXXXXXXXXXXXXXXXXXXXXXXXXXXXXXXXXTIRTRKYLTNRLLCRKQMVVDIIHPGKATVPKTEVREKLARMFKTTPDVITCFGFKTKFGGGKTSGFALIYDNMNVAKKFEPKYRLVRQGATARKQRKERKNRQKKVRGTAKVRDKLNNLVLFDKATYDKLYKEVPSYKLITPSVVSERLKIRGSLAKVALRELHQKKMIRLVCKHHTQIIYTRATRGARKHLKRVTAPKSWMLDKLGGVFAPRPTPGPHKLRESLPMCVLLRNRLKYALNYEEVKKICMQRLIRVDGKVRTDKTFPTGFMDVIGIQKTGENFRILYDVKGRFVVHRIKPEEAKYKLCSVKKCQLGQKAIPYLATHDGKTIRYPDPAIKVHDTVMVDIETGKIKDYIKFDSGNVCMLTGGHNLGRVGTIQSKERHPGSFDIVHIKDSQGHTFATRMNYVFVIGKGSKPWISLPKGKGIKLSITEERDKRXXXXXXXXXXXXXXXXXXXXXXXXXXXXXXXXXXXXXXXXXXXXXXXXXXXXXXXXXXXXXXXXXXXXXXXXXXXXXXXXXXXXXXXXXXXXXXXXXXXXXXXXXXXXXXXXXXXXXXXXXXXXXXXXXXXXXXXXXXXXXXXXXXXXXXXXXXXXXXXXXXXXXXXXXXXXXXXXXXXXXXXXXXXXSDIEYSLIQALFELETNSDLKLQLRELHIVSAREKKAIVIFVPYILLRNFQKIQTRLVRELEKKYSGKHVVFVAQRKILAQPKRKQKLQRSRLRTLTKVHEDLLDDICYPAEIVGKRIRIKLDGSRLIKVHLDKTQQTNIEHKVDTFSAVYKTLTGKDVKFEFXXXXXXXXXXXXXXXXXXXXXXXXXXXXXXXXXXXXXXXXXXXXXXXXXXXXXXXXXXXXXXXXXXXXXXXXXXXXXXXXXXXXXXXXXXXXXXXXXXXXXXXXXXXXXXXXXXXXXXXXXXXXXXXXXXXXXXXXXXXXXXXXXXXXXXXXXXXXXXXXXXXXXXXXXXXXXXXXXXXXXXXXXXXXXXXXXXXXXXXXXXXXXXXXXXXXXXXXXXXXXXXXXXXXXXXXXXXXXXXXXXXXXXXXXXXXXXXXXXXXXXXXXXXXXXXXXXXXXXXXXXXXXXXXXXXXXXXXXXXXXXXXXXXXXXXXXXXXXXXXXXXXXXXXXXXXXXXXXXXXXXXXXXXXXXXXXXXXXXXXXXXXXXXXXXXXXXXXXXXXXXXXXXXXXXXXXXXXXXXXXXXXXXXXXXXXXXXXXXXXXXXXXXXXXXXXXXXXXXXXXXXXXXXXXXXXXXXXXXXXXXXXXXXXXXXXXXXXXXXXXXXXXXXXXXXXXXXXXXXXXXXXXXXXXXXXXXXXXXXXXXXXXXXXXXXXXXXXXXXXXXXXXXXXXDSNIRIWVFLPIVVITFLVGIIRHYVTILLSSEKDSHALMRSRILRENGKYIPKDSYLIRKSFFNHEEKGFFNTENPMTDPSMMTDMMKGNITNVLPMIVIGGWINWAFSGFLTTKVPFPLTLRFKPMLQRGVELQSLDASWVSSASWYFLNVFGLRSMYTLILGQDNAADQTRMMQEQMSGSAMMAPQDPMGDRYNIHTQLEHLQSKYIGTGHADTNKWEWLTNQHRDSASSYLGHFDTLNYFGLVENEAKARVKFSLMEKMLQPCGPPPKRIEDXXXXXXXXXXXXXXXXXXXXXXXXXXXXXXXXXXXXXXXXXXXXXXXXXXXXXXXXXXXXXXXXXXXXXXXXXXXXXXXXXXXXXXXXXXXXXXXXXXXXXXXXXXXXXXXXXXXXXXXXXXXXXXXXXXXXXXXXXXXXXXXXXXXXXXXXXXXXXXXXXXXXXXXXXXXXXPQGDVEKGKKLFVQRCKQCHNVDKGGKNATGPALHGLWGRKTGQAPGFGYTTANVNKGITWNKDTLFEYLENPKKYIPGTKMVFAGLKKPKDRADLIAYLESTTXXXXXXXXXXXXXXXXXXXXXXXXXXXXXXXXXXXXXXXXXXXXXXXXXXXXXXXXXXXXXXXXXXXXXXXXXDPFAESGEQEGLIHIRIQQRNGRKTLTTVQGIHPKYDLKKIVKACKKQYACNGTVSINPEYGECIQLQGDQREKIKEFMMQVGLARPEQIKVHGFFEARLVQGSLLKKILEATKDLLNEALWDCSTNGITLQAMDSSHVSLVSLKMRSDGFETYRCDRNISLGMATASMSKILRCAGNDDIVTVKAEDDKVTFVFESPQGEKMSDYEMKLIDLDAEHLGIPDTEYSCVVKMPSAEFQRVCRDLSQIGESVVITCTKEGVKFTATGDLGTGNIKLAQNINTDKEEESVVVEMSQGVCLTFALRYLNFFTKATPLSPQVTLSMSQDVPLVVEYKIGDMGQLRYYLAPKIXXXXXXXXXXXXXXXXXXXXXXXXXXXXXXXXXXXXXXXXXXXXXXXXXXXXXXXXXXXXXXXXXXXXXXXXXXXXXXXXXXXXXXXXXXXXXXXXXXXXXXXXXXXXXXXXXXXXXXXXXXXXXXXXXXXXXXXXXXXXXXXXXXXXXXXXXXXXXXXXXXXXXXXXXXXXXXXXXXXXXXXXXXXXXXXXXXXXXXXXXXXXXXXXXXXXXXXXXXXXXXXXXXXXXXXXXXXXXXXXXXXXXXXXXXXXXXXXXXXXXXXXXXXXXXXXXXXXXXXXXXXXXXXXXXXXXXXXXXXXXXXXXXXXXXXXXXXXXXXXXXXXXXXXXXXXXXXXXXXXXXXXXXXXXXXXXXXXXXXXXXXXXXXXXXXXXXXXXXXXXXXXXXXXXXXXXXXXXXXXXXXXXXXXXXXXXXXXXXXXXXXXXXXXXXXXXXXXXXXXXXXXXXXXXXXXXXXXXXXXXXXXXXXXXXXXXXXXXXXXXXXXXXXXXXXXXXXXXXXXXXXXXXXXXXXXXXXXXXXXXXXXXXXXXXXXXXXXXXXXXXXXXXXXXXXXXXXXXXXXXXXXXXXXXXXXXXXXXXXXXXXXXXXXXXXXXXXXXXXXXXXXXXXXXXXXXXXXXXXXXXXXXXXXXXXXXXXXXXXXXXXXXXXXXXXXXXXXXXXXXXXXXXXXXXXXXXXXXXXXXXXXXXXXXXXXXXXXXXXXXXXXXXXXXXXXXXXXXXXXXXXXXXXXXXXXXXXXXXXXXXXXXXXXXXXXXXXXXXXXXXXXXXXXXXXXXXXXXXXXXXXXXXXXXXXXXXXXXXXXXXXXXXXXXXXXXXXXXXXXXXXXXXXXXXXXXXXXXXXXXXXXXXXXXXXXXXXXXXXXXXXXXXXXXXXXXXXXXXXXXXXXXXXXXXXXXXXXXXXXXXXXXXXXXXXXXXXXXXXXXXXXXXXXXXXXXXXXXXXXXXXXXXXXXXXXXXXXXXXXXXXXXXXXXXXXXXXXXXXXXXXXXXXXXXXXXXXXXXXXXXXXXXXXXXXXXXXXXXXXXXXXXXXXXXXXXXXXXX
Epiperipatus_sp                XXXXXXXXXXXXXXXXXXXXXXXXXXXXXXXXXXXXXXXXXXXXXXXXXXXXXXXXXXXXXXXXXXXXXXXXXXXXXXXXXXXXXXXXXXXXXXXXXXXXXXXXXXXXXXXXXXXXXXXXXXXXXXXXXXXXXXXXXXXXXXXXXXXXXXXXXXXXXXXXXXXXXXXXXXXXXXXXXXXXXXXXXXXXXXXXXXXXXXXXXXXXXXXXXXXXXXXXXXXXXXXXXXXXXXXXXXXXXXXXXXXXXXXXXXXXXXXXXXXXXXXXXXXXXXXXXXXXXXXXXXXXXXXXXXXXXXXXXXXXXXXXXXXXXXXXXXXXXXXXXXXXXXXXXXXXXXXXXXXXXXXXXXXXXXXXXXXXXXXXXXXXXXXXXXXXXXXXXXXXXXXXXXXXXXXXXXXXXXXXXXXXXXXXXXXXXXXXXXXXXXXXXXXXXXXXXXXXXXXXXXXXXXXXXXXXXXXXXXXXXXXXXXXXXXXXXXXXXXXXXXXXXXXXXXXXXXXXXXXXXXXXXXXXXXXXXXXXXXXXXXXXXXXXXXXXXXXXXXXXXXXXXXXXXXXXXXXXXXXXXXXXXXXXXXXXXXXXXXXXXXXXXXXXXXXXXXXXXXXXXXXXXXXXXXXXXXXXXXXXXXXXXXXXXXXXXXXXXXXXXXXXXXXXXXXXXXXXXXXXXXXXXXXXXXXXXXXXXXXXXXXXXXXXXXXXXXXXXXXXXXXXXXXXXXXXXXXXXXXXXXXXXXXXXXXXXXXXXXXXXXXXXXXXXXXXXXXXXXXXXXXXXXXXXXXXXXXXXXXXXXXXXXXXXXXXXXXXXXXXXXXXXXXXXXXXXXXXXXXXXXXXXXXXXXXXXXXXXXXXXXXXXXXXXXXXXXXXXXXXXXXXXXXXXXXXXXXXXXXXXXXXXXXXXXXXXXXXXXXXXXXXXXXXXXXXXXXXXXXXXXXXXXXXXXXXXXXXXXXXXXXXXXXXXXXXXXXXXXXXXXXXXXXXXXXXXXXXXXXXXXXXXXXXXXXXXXXXXXXXXXXXXXXXXXXXXXXXXXXXXXXXXXXXXXXXXXXXXXXXXXXXXXXXXXXXXXXXXXXXXXXXXXXXXXXXXXXXXXXXXXXXXXXXXXXXXXXXXXXXXXXXXXXXXXXXXXXXXXXXXXXXXXXXXXXXXXXXXXXXXXXXXXXXXXXXXXXXXXXXXXXXXXXXXXXXXXXXXXXXXXXXXXXXXXXXXXXXXXXXXXXXXXXXXXXXXXXXXXXXXXXXXXXXXXXXXXXXXXXXXXXXXXXXXXXXXXXXXXXXXXXXXXXXXXXXXXXXXXXXXXXXXXXXXXXXXXXXXXXXXXXXXXXXXXXXXXXXXXXXXXXXXXXXXXXXXXXXXXXXXXXXXXXXXXXXXXXXXXXXXXXXXXXXXXXXXXXXXXXXXXXXXXXXXXXXXXXXXXXXXXXXXXXXXXXXXXXXXXXXXXXXXXXXXXXXXXXXXXXXXXXXXXXXXXXXXXXXXXXXXXXXXXXXXXXXXXXXXXXXXXXXXXXXXXXXXXXXXXXXXXXXXXXXXXXXXXXXXXXXXXXXXXXXXXXXXXXXXXXXXXXXXXXXXXXXXXXXXXXXXXXXXXXXXXXXXXXXXXXXXXXXXXXXXXXXXXXXXXXXXXXXXXXXXXXXXXXXXXXXXXXXXXXXXXXXXXXXXXXXXXXXXXXXXXXXXXXXXXXXXXXXXXXXXXXXXXXXXXXXXXXXXXXXXXXXXXXXXXXXXXXXXXXXXXXXXXXXXXXXXXXXXXXXXXXXXXXXXXXXXXXXXXXXXXXXXXXXXXXXXXXXXXXXXXXXXXXXXXXXXXXXXXXXXXXXXXXXXXXXXXXXXXXXXXXXXXXXXXXXXXXXXXXXXXXXXXXXXXXXXXXXXXXXXXXXXXXXXXXXXXXXXXXXXXXXXXXXXXXXXXXXXXXXXXXXXXXXXXXXXXXXXXXXXXXXXXXXXXXXXXXXXXXXXXXXXXXXXXXXXXXXXXXXXXXXXXXXXXXXXXXXXXXXXXXXXXXXXXXXXXXXXXXXXXXXXXXXXXXXXXXXXXXXXXXXXXXXXXXXXXXXXXXXXXXXXXXXXXXXXXXXXXXXXXXXXXXXXXXXXXXXXXXXXXXXXXXXXXXXXXXXXXXXXXXXXXXXXXXXXXXXXXXXXXXXXXXXXXXXXXXXXXXXXXXXXXXXXXXXXXXXXXXXXXXXXXXXXXXXXXXXXXXXXXXXXXXXXXXXXXXXXXXXXXXXXXXXXXXXXXXXXXXXXXXXXXXXXXXXXXXXXXXXXXXXXXXXXXXXXXXXXXXXXXXXXXXXXXXXXXXXXXXXXXXXXXXXXXXXXXXXXXXXXXXXXXXXXXXXXXXXXXXXXXXXXXXXXXXXXXXXXXXXXXXXXXXXXXXXXXXXXXXXXXXXXXXXXXXXXXXXXXXXXXXXXXXXXXXXXXXXXXXXXXXXXXXXXXXXXXXXXXXXXXXXXXXXXXXXXXXXXXXXXXXXXXXXXXXXXXXXXXXXXXXXXXXXXXXXXXXXXXXXXXXXXXXXXXXXXXXXXXXXXXXXXXXXXXXXXXXXXXXXXXXXXXXXXXXXXXXXXXXXXXXXXXXXXXXXXXXXXXXXXXXXXXXXXXXXXXXXXXXXXXXXXXXXXXXXXXXXXXXXXXXXXXXXXXXXXXXXXXXXXXXXXXXXXXXXXXXXXXXXXXXXXXXXXXXXXXXXXXXXXXXXXXXXXXXXXXXXXXXXXXXXXXXXXXXXXXXXXXXXXXXXXXXXXXXXXXXXXXXXXXXXXXXXXXXXXXXXXXXXXXXXXXXXXXXXXXXXXXXXXXXXXXXXXXXXXXXXXXXXXXXXXXXXXXXXXXXXXXXXXXXXXXXXXXXXXXXXXXXXXXXXXXXXXXXXXXXXXXXXXXXXXXXXXXXXXXXXXXXXXXXXXXXXXXXXXXXXXXXXXXXXXXXXXXXXXXXXXXXXXXXXXXXXXXXXXXXXXXXXXXXXXXXXXXXXXXXXXXXXXXXXXXXXXXXXXXXXXXXXXXXXXXXXXXXXXXXXXXXXXXXXXXXXXXXXXXXXXXXXXXXXXXXXXXXXXXXXXXXXXXXXXXXXXXXXXXXXXXXXXXXXXXXXXXXXXXXXXXXXXXXXXXXXXXXXXXXXXXXXXXXXXXXXXXXXXXXXXXXXXXXXXXXXXXXXXXXXXXXXXXXXXXXXXXXXXXXXXXXXXXXXXXXXXXXXXXXXXXXXXXXXXXXXXXXXXXXXXXXXXXXXXXXXXXXXXXXXXXXXXXXXXXXXXXXXXXXXXXXXXXXXXXXXXXXXXXXXXXXXXXXXXXXXXXXXXXXXXXXXXXXXXXXXXXXXXXXXXXXXXXXXXXXXXXXXXXXXXXXXXXXXXXXXXXXXXXXXXXXXXXXXXXXXXXXXXXXXXXXXXXXXXXXXXXXXXXXXXXXXXXXXXXXXXXXXXXXXXXXXXXXXXXXXXXXXXXXXXXXXXXXXXXXXXXXXXXXXXXXXXXXXXXXXXXXXXXXXXXXXXXXXXXXXXXXXXXXXXXXXXXXXXXXXXXXXXXXXXXXXXXXXXXXXXXXXXXXXXXXXXXXXXXXXXXXXXXXXXXXXXXXXXXXXXXXXXXXXXXXXXXXXXXXXXXXXXXXXXXXXXXXXXXXXXXXXXXXXXXXXXXXXXXXXXXXXXXXXXXXXXXXXXXXXXXXXXXXXXXXXXXXXXXXXXXXXXXXXXXXXXXXXXXXXXXXXXXXXXXXXXXXXXXXXXXXXXXXXXXXXXXXXXXXXXXXXXXXXXXXXXXXXXXXXXXXXXXXXXXXXXXXXXXXXXXXXXXXXXXXXXXXXXXXXXXXXXXXXXXXXXXXXXXXXXXXXXXXXXXXXXXXXXXXXXXXXXXXXXXXXXXXXXXXXXXXXXXXXXXXXXXXXXXXXXXXXXXXXXXXXXXXXXXXXXXXXXXXXXXXXXXXXXXXXXXMGRRPARCYRYCKNKPYPKSRFCRGVPDPKIRIFDLGRKKARVDEFPLCVHLVSDEYEQLSSEALEAGRICANKYLVKYCGKDAFHIRMRVHPFHVIRINKMLSCAGADRLQTGMRGAFGKPQGTVARVNIGQPIMSVRAKENHKAQVIEALRRAKFKFPGRQKIHVSKKWGFTKWDASEFEKLRAEGILVPDGFYCKYRNGRGPLXXXXXXXXXXXXXXXXXXXXXXXXXXXXXXXXXXXXXXXXXXXXXXXXXXXXXXXXXXXXXXXXXXXXXXXXXXXXXXXXXXXXXXXXXXXXXXXXXXXXXXXXXXXXXXXXXXXXXXXXXXXXXXXXXXXXXXXXXXXXXXXXXXXXXXXXXXXXXXXXXXXXXXXXXXXXXXXXXXXXXXXXXXXXXXXXXXXXXXXXXXXXXXXXXXXXXXXXXXXXXXXXXXXXXXXXXXXXXXXXXXXXXXXXXXXXXXXXXXXXXXXXXXXXXXXXXXXXXXXXXXXXXXXXXXXXXXXXXXXXXXXXXXXXXXXXXXXXXXXXXXXXXXXXXXXXXXXXXXXXXXXXXXXXXXXXXXXXXXXXXXXXXXXXXXXXXXXXXXXXXXXXXXXXXXXXXXXXXXXXXXXXXXXXXXXXXXXXXXXXXXXXXXXXXXXXXXXXXXXXXXXXXXXXXXXXXXXXXXXXXXXXXXXXXXXXXXXXXXXXXXXXXXXXXXXXXXXXXXXXXXXXXXXXXXXXXXXXXXXXXXXXXXXXXXXXXXXXXXXXXXXXXXXXXXXXXXXXXXXXXXXXXXXXXXXXXXXXXXXXXXXXXXXXXXXXXXXXXXXXXXXXXXXXXXXXXXXXXXXXXXXXXXXXXXXXXXXXXXXXXXXXXXXXXXXXXXXXXXXXXXXXXXXXXXXXXXXXXXXXXXXXXXXXXXXXXXXXXXXXXXXXXXXXXXXXXXXXXXXXXXXXXXXXXXXXXXXXXXXXXXXXXXXXXXXXXXXXXXXXXXXXXXXXXXXXXXXXXXXXXXXXXXXXXXXXXXXXXXXXXXXXXXXXXXXXXXXXXXXXXXXXXXXXXXXXXXXXXXXXXXXXXXXXXXXXXXXXXXXXXXXXXXXXXXXXXXXXXXXXXXXXXXXXXXXXXXXXXXXXXXXXXXXXXXXXXXXXXXXXXXXXXXXXXXXXXXXXXXXXXXXXXXXXXXXXXXXXXXXXXXXXXXXXXXXXXXXXXXXXXXXXXXXXXXXXXXXXXXXXXXXXXXXXXXXXXXXXXXXXXXXXXXXXXXXXXXXXXXXXXXXXXXXXXXXXXXXXXXXXXXXXXXXXXXXXXXXXXXXXXXXXXXXXXXXXXXXXXXXXXXXXXXXXXXXXXXXXXXXXXXXXXXXXXXXXXXXXXXXXXXXXXXXXXXXXXXXXXXXXXXXXXXXXXXXXXXXXXXXXXXXXXXXXXXXXXXXXXXXXXXXXXXXXXXXXXXXXXXXXXXXXXXXXXXXXXXXXXXXXXXXXXXXXXXXXXXXXXXXXXXXXXXXXXXXXXXXXXXXXXXXXXXXXXXXXXXXXXXXXXXXXXXXXXXXXXXXXXXXXXXXXXXXXXXXXXXXXXXXXXXXXXXXXXXXXXXXXXXXXXXXXXXXXXXXXXXXXXXXXXXXXXXXXXXXXXXXXXXXXXXXXXXXXXXXXXXXXXXXXXXXXXXXXXXXXXXXXXXXXXXXXXXXXXXXXXXXXXXXXXXXXXXXXXXXXXXXXXXXXXXXX------------------------------------------------------FNNVSKGQIAKKEDLTKAFGDNQ-EICLQILAKGELQVSEKERH-HLESTFKEIAS-VADKCVNPETKRPYPVS-IEKAMKDIHYSIKANRSTKQQALDVIRQL-XXXXXXXXXXXXXXXXXXXXXXXXXXXXXXXXXXXXXXXXXXXXXXXXXXXXXXXXXXXXXXXXXXXXXXXXXXXXXXXXXXXXXXXXXXXXXXXXXXXXXXXXXXXXXXXXXXXXXXXXXXXXXXXXXXXXXXXXXXXXXXXXXXXXXXXXXXXXXXXXXXXXXXXXXXXXXXXXXXXXXXXXXXXXXXXXXXXXXXXXXXXXXXXXXXXXXXXXXXXXXXXXXXXXXXXXXXXXXXXXXXXXXXXXXXXXXXXXXXXXXXXXXXXXXXXXXXXXXXXXXXXXXXXXXXXXXXXXXXXXXXXXXXXXXXXXXXXXXXXXXXXXXXXXXXXXXXXXXXXXXXXXXXXXXXXXXXXXXXXXXXXXXXXXXXXXXXXXXXXXXXXXXXXXXXXXXXXXXXXXXXXXXXXXXXXXXXXXXXXXXXXXXXXXXXXXXXXXXXXXXXXXXXXXXXXXXXXXXXXXXXXXXXXXXXXXXXXXXXXXXXXXXXXXXXXXXXXXXXXXXXXXXXXXXXXXXXXXXXXXXXXXXXXXXXXXXXXXXXXXXXXXXXXXXXXXXXXXXXXXXXXXXXXXXXXXXXXXXXXXXXXXXXXXXXXXXXXXXXXXXXXXXXXXXXXXXXXXXXXXXXXXXXXXXXXXXXXXXXXXXXXXXXXXXXXXXXXXXXXXXXXXXXXXXXXXXXXXXXXXXXXXXXXXXXXXXXXXXXXXXXXXXXXXXXXXXXXXXXXXXXXXXXXXXXXXXXXXXXXXXXXXXXXXXXXXXXXXXXXXXXXXXXXXXXXXXXXXXXXXXXXXXXXXXXXXXXXXXXXXXXXXXXXXXXXXXXXXXXXXXXXXXXXXXXXXXXXXXXXXXXXXXXXXXXXXXXXXXXXXXXXXXXXXXXXXXXXXXXXXXXXXXXXXXXXXXXXXXXXXXXXXXXXXXXXXXXXXXXXXXXXXXXXXXXXXXXXXXXXXXXXXXXXXXXXXXXXXXXXXXXXXXXXXXXXXXXXXXXXXXXXXXXXXXXXXXXXXXXXXXXXXXXXXXXXXXXXXXXXXXXXXXXXXXXXXXXXXXXXXXXXXXXXXXXXXXXXXXXXXXXXXXXXXXXXXMASKDELACVYSALILQDDDVAITGEKIATILKAANVDVEPFWPGLFARALEG-DIKSLI-NIGSXXXXXXXXXXXXXXXXXXXXXXXXXXXXXXXXXXXXXXXXXXXXXXXXXXXXXXXXXXXXXXXXXXXXXXXXXXXXXXXXXXXXXXXXXXXXXXXXXXXXXXXXXXXXXXXXXXXXXXXXXXXXXXXXXXXXXXXXXXXXXXXXXXXXXXXXXXXXXXXXXXXXXXXXXXXXXXXXXXXXXXXXXXXXXXXXXXXXXXXXXXXXXXXXXXXMPPKFDPYEIKVVCLRDIGGEVGATAYLAPKIGPL----------IAKATQDWKGLKITVKLFIQNQQATISVVPSAAALIIKALKEPPRDRKKQKNIKHSGNVSFDDIVSIARQMRRSMARKLQGTVKEILGTAHSVGCTVEGCNPRDVIEKVNS-EMEVPXXXXXXXXXXXXXXXXXXXXXXXXXXXXXXXXXXXXXXXXXXXXXXXXXXXXXXXXXXXXXXXXXXXXXXXXXXXXXXXXXXXXXXXXXXXXXXXXXXXXXXXXXXXXXXXXXXXXXXXXXXXXXXXXXXXXXXXXXXXXXXXXXXXXXXXXXXXXXXXXXXXXXXXXXXXXXXXXXXXXXXXXXXXXXXXXXXXXXXXXXXXX--------ENATKSCKARGSNLRVHFKNTRETAQAIKKMHLRRATRYLKNVINKKEIVPFRRFNGGVGRKAQCKNWKTQGRWPKKSAEFLLQLLKNAESNAEYKGLDSDHLVIEHIQVNRAPKMRRRTYRAHGRINPYMSSPCHIEVILTEKEXXXXXXXXXXXXXXXXXXXXXXXXXXXXXXXXXXXXXXXXXXXXXXXXXXXXXXXXXXXXXXXXXXXXXXXXXXXXXXXXXXXXXXXXXXXXXXXXXXXXXXXXXXXXXXXXXXXXXXXXXXXXXXXXXXXXXXXXXXXXXXXXXXXXXXXXXXXXXXXXXXXXXXXXXXXXXXXXXXXXXXXXXXXXXXXXXXXXXXXXXXXXXXXXXXXXXXXXXXXXXXXXXXXXXSHRKFSAPRHGSMGFVPKKRCKRHQGKIKAFPKDDPSKPVHLTGFMGFKAGMTHIVREVDKPGSKVNKKEVVEPVTILETPPMVIVGVVGYIETPRGLRSLKTIFAEHLNEECRRRFYKNYKAKKKAFTKYAKKWQDEAGKKEIERDFSTMMKYCKVIRVIAHTQIKLLRKRQKKANIMEIQLNGGTIADKVNWAREHLEKQVPVSKVFAQDEFIDVIGITKG-----------------------------------------------------------------------------------------------------------------------------------------------------------------------------------------------------MGTPDVRIDTRLNKHVWSRGVRSVPFRIRVRLSRRRNEDEDSVHKLYTLVTYVPVASFKGLQTINVDXXXXXXXXXXXXXXXXXXXXXXXXXXXXXXXXXXXXXXXXXXXXXXXXXXXXXXXXXXXXXXXXXXXXXXXXXXXXXXXXXXXXXXXXXXXXXXXXXXXXXXXXXXXXXXXXXXXXXXXXXXXXXXXXXXXXXXXXXXXXXXXXXXXXXXXXXXXXXXXXXXXXXXXXXXXXXXXXXXXXXXXXXXXXXXXXXXXXXXXXXX----TSRFGERHNKTHTLCKRCGKSSYHILKSRCAQCGYPRRRLRHYNWSVILQRIKS-GTGRMRHLRAIHKRFKNHFREGMASHKTFKIKQKLAKKQNQNRPIPQWIRMRTGNTIRYNAKRRHWRRTKLKLXXXXXXXXXXXXXXXXXXXXXXXXXXXXXXXXXXXXXXXXXXXXXXXXXXXXXXXXXXXXXXXXXXXXXXXXXXXXXXXXXXXXXXXXXXXXXXXXXXXXXXXXXXXXXXXXXXXXXXXXXXXXXXXXXXXXXXXXXXXXXXXXXXXXXXXXXXXXXXXXXXXXXXXXXXXXXXXXXXXXXXXXXXXXXXXXXXXXXXXXXXXXXXXXXXXXXXXXXXXXXXXXXXXXXXXXXXXXXXXXXXXXXXXXXXXXXXXXXXXXXXXXXXXXX-----------------------------------------------------------------------------------------------------------------------------------------------------------DLKEVVNKLIPDSIGKDIEKACHGIYPLYDVFVRKVKVLKKPKFDLGKLL-LHGPDGYEPSILDSVMLMPKKNRTAIYEYLFKEGVLVAKKDFHAPEHVPNLHVIKAMQSLKSRGYVKEQFAWMHYYWYVTNEGIQFLRDYLHLPPEIVPATLKXXXXXXXXXXXXXXXXXXXXXXXXXXXXXXXXXXXXXXXXXXXXXXXXXXXXXXXXXXXXXXXXXXXXXXXXXXXXXXXXXXXXXXXXXXXXXXXXXXXXXXXXXXXXXXXXXXXXXXXXXXXXXXXXXXXHRIRITLTGRSVKSLEKVCSDLIRGAKEKQLHVKGPVRIPTKVLRITTRKTPCGEGSKTWDRFQMRIHKRVIDLHSPSEIVKQI-----------------XXXXXXXXXXXXXXXXXXXXXXXXXXXXXXXXXXXXXXXXXXXXXXXXXXXXXXXXXXXXXXXXXXXXXXXXXXXXXXXXXXXXXXXXXXXXXXXXXXXXXXXXXXXXXXXXXXXXXXXXXXXXXXXXXXXXXXXXXXXXXXXXXXXXXXXXXXXXXXXXXXXXXXXXXXXXXXXXXXXXXXXXXXRGPKKHLKRLNAPKHWMLDKLSGVFAPKPSSGPHKTRECLPLILFLRNRLRYALTGEEAKKIVRQRLIKVDGKIRTDLTFPAGFMDVITIEKIGENFRLIYDVKGRFAIHRITPEEAKYKLCRVRRVQTGPKGIPFLVTHDGRTIRYPDPLIKVNDTIQVDIESGKILDFIKFDSGNLCMITGGHNLGRVGTVTHRERHPGSFDIVLVKDALGHEFATRLSNVFIIGKGNKP---------------------XXXXXXXXXXXXXXXXXXXXXXXXXXXXXXXXXXXXXXXXXXXXXXXXXXXXXXXXXXXXXXXXXXXXXXXXXXXXXXXXXXXXXXXXXXXXXXXXXXXXXXXXXXXXXXXXXXXXXXXXXXXXXXXXXXXXXXXXXXXXXXXXXXXXXXXXXXXXXXXXXXXXXXXXXXXXXXXXXXXXXXXXXXXX---EASISQALLELEMNSDLKAQLRELQISAAKEKKAIIIFVPVPQLKSYQKIQTRLVRELEKKFSGKHVVFIAQRRILPKPTRKNRQKRPRSRTLTAVHDAILEDLVYPAEIVGKRIRIRLDGTRLIKVHLDKNQQTNIEHKTETFSAVYKKLTGKEVIFEFXXXXXXXXXXXXXXXXXXXXXXXXXXXXXXXXXXXXXXXXXXXXXXXXXXXXXXXXXXXXXXXXXXXXXXXXXXXXXXXXXXXXXXXXXXXXXXXXXXXXXXXXXXXXXXXXXXXXXXXXXXXXXXXXXXXXXXXXXXXXXXXXXXXXXXXXXXXXXXXXXXXXXXXXXXXXXXXXXXXXXXXXXXXXXXXXXXXXXXXXXXXXXXXXXXXXXXXXXXXXXXXXXXXXXXXXXXXXXXXXXXXXXXXXXXXXXXXXXXXXXXXXXXXXXXXXXXXXXXXXXXXXXXXXXXXXXXXXXXXXXXXXXXXXXXXXXXXXXXXXXXXXXXXXXXXXXXXXXXXXXXXXXXXXXXXXXXXXXXXXXXXXXXXXXXXXXXXXXXXXXXXXXXXXXXXXXXXXXXXXXXXXXXXXXXXXXXXXXXXXXXXXXXXXXXXXXXXXXXXXXXXXXXXXXXXXXXXXXXXXXXXXXXXXXXXXXXXXXXXXXXXXXXXXXXXXXXXXXXXXXXXXXXXXXXXXXXXXXXXXXXXXXXXXXXXXXXXXXXXXXXXXXXXXXXXXXXXXXXXXXXXXXXXXXXXXXXXXXXXXXXXXXXXXXXXXXXXXXXXXXXXXXXXXXXXXXXXXXXXXXXXXXXXXXXXXXXXXXXXXXXXXXXXXXXXXXXXXXXXXXXXXXXXXXXXXXXXXXXXXXXXXXXXXXXXXXXXXXXXXXXXXXXXXXXXXXXXXXXXXXXXXXXXXXXXXXXXXXXXXXXXXXXXXXXXXXXXXXXXXXXXXXXXXXXXXXXXXXXXXXXXXXXXXXXXXXXXXXXXXXXXXXXXXXXXXXXXXXXXXXXXXXXXXXXXXXXXXXXXXXXXXXXXXXXXXXXXXXXXXXXXXXXXXXXXXXXXXXXXXXXXXXXXXXXXXXXXXXXXXXXXXXXXXXXXXXXXXXXXXXXXXXXXXXXXXXXXXXXXXXXXXXXXXXXXXXXXXXXXXXXXXXXXXXXXXXXXXXXXXXXXXXXXXXXXXXXXXXXXXXXXXXXXXXXXXXXXXXXXXXXXXXXXXXXXXXXXXXXXXXXXXXXXXXXXXXXXXXXXXXXXXXXXXXXXXXXXXXXXXXXXXXXXXXXXXXXXXXXXXXXXXXXXXXXXXXXXXXXXXXXXXXXXXXXXXXXXXXXXXXXXXXXXXXXXXXXXXXXXXXXXXXXXXXXXXXXXDPFADAVKQEGLIHIRIQQRNGRKTLTTVQGISDDYDKKKIVKACKKEFACNGTVVEHPEYGEVIQLQGDQRNNICQFLTKIGIAKPEQLKVHGFXXXXXXXXXXXXXXXXXXXXXXXXXXXXXXXXXXXXXXXXXXXXXXXXXXXXXXXXXXXXXXXXXXXXXXXXXXXXXXXXXXXXXXXXXXXXXXXXXXXXXXXXXXXXXXXXXXXXXXXXXXXXXXXXXXXXXXXXXXXXXXXXXXXXXXXXXXXXXXXXXXXXXXXXXXXXXXXXXXXXXXXXXXXXXXXXXXXXXXXXXXXXXXXXXXXXXXXXXXXXXXXXXXXXXXXXXXXXXXXXXXXXXXXXXXXXXXXXXXXXXXXXXXXXXXXXXXXXXXXXXXXXXXXXXXXXXXXXXXXXXXXXXXXXXXXXXXXXXXXXXXXXXXXXXXXXXXXXXXXXXXXXXXXXXXXXXXXXXXXXXXXXXXXXXXXXXXXXXXXXXXXXXXXXXXXXXXXXXXXXXXXXXXXXXXXXXXXXXXXXXXXXXXXXXXXXXXXXXXXXXXXXXXXXXXXXXXXXXXXXXXXXXXXXXXXXXXXXXXXXXXXXXXXXXXXXXXXXXXXXXXXXXXXXXXXXXXXXXXXXXXXXXXXXXXXXXXXXXXXXXXXXXXXXXXXXXXXXXXXXXXXXXXXXXXXXXXXXXXXXXXXXXXXXXXXXXXXXXXXXXXXXXXXXXXXXXXXXXXXXXXXXXXXXXXXXXXXXXXXXXXXXXXXXXXXXXXXXXXXXXXXXXXXXXXXXXXXXXXXXXXXXXXXXXXXXXXXXXXXXXXXXXXXXXXXXXXXXXXXXXXXXXXXXXXXXXXXXXXXXXXXXXXXXXXXXXXXXXXXXXXXXXXXXXXXXXXXXXXXXXXXXXXXXXXXXXXXXXXXXXXXXXXXXXXXXXXXXXXXXXXXXXXXXXXXXXXXXXXXXXXXXXXXXXXXXXXXXXXXXXXXXXXXXXXXXXXXXXXXXXXXXXXXXXXXXXXXXXXXXXXXXXXXXXXXXXXXXXXXXXXXXXXXXXXXXXXXXXXXXXXXXXXXXXXXXXXXXXXXXXXXXXXXXXXXXXXXXXXXXXXXXXXXXXXXXXXXXXXXXXXXXXXXXXXXXXXXXXXXXXXXXXXXXXXXXXXXXXXXXXXXXXXXXXXXXXXXXXXXXXXXXXXXXXXXXXXXXXXXXXXXXXXXXXXXXXXXXXXXXXXXXXXXXXXXXXXXXXXXXXXXXXXXXXXXXXXXXXXXXXXXXXXXXXXXXXXXXXXXXXXXXXXXXXXXXXXXXXXXXXXXXXXXXXXXXXXXXXXXXXXXXXXXXXXXXXXXXXXXXXXXXXXXXXXXXXXXXXXXXXXXXXXXXXXXXXXXXXXXXXXXXXXXXXXXXXXXXXXXXXXXXXXXXXX
Ephemera_danica                RTTGTPVRTQNVMAACSIANIVKSSLGPVGLDKMLVDDIGDVTVTNDGATILKLLEVEHPAAKVLVELAQLQDLEVGDGTTSVVIMAAELLKNADELVQQKIHPTSVISGYRLACKEACRYINEHLTIGVDDIGKDCLINVAKTSMSSKLIGPDSELFSQLVVDAALAIRDGKGGYLCPIKAVNILKAHGQSARESSLVKGYALNCTVASQAMPKRIANAKVACLDFSLQKAKMKLGVQVLVTDPEKLDAIRQRESDITKERVQKILNSGANVILCSGGIDDLCLKYFVEAGAMAARRCKKVDLKRIAKATGATFVTSLSNMEGEESFEASFLGEAAEVVQERISDDECILIKRTAASIILRGPNDFYLDEMERSVHDALCVVKRVVESKRLVAGGGCVEAALSIYLENFATSLSSREQLAIAEFARSLLVIPKTLAVNAAQDATELVAKLRAFHNASQTHSTFKWMGLDLYEGVVKDNLQAGVLEPAMSKVKALKFATEAAITILRIDDMIRLKSKPRDIRASNITAAKAVADAIRTSLGPRGMDKMIQSGNGDVTITNDGATILKQMNVMHPAAKMLVELSRAQDIEAGDGTTSVVVIAGSLLEASEKLLARGIHPSAISDAFQRAAAKSVDILMSKPVELNDRESLIQSASTSLNSKVVSQHSSQLAPLAVDAVLKNVDLKDIKVLCQLGGTVEDTELVDGLVFTQKGPRKVEKAKIGLIQFCISPPKTDMDHNVVVSDYAAMDRVLKEERSYILNIVKQIKKAGCNVLLVQKSILRDAVSDLALHFLDKIKCMVIKDVEREDIDFVCKTLGCRPIASLDHFTAENLVSADLVEEASTKIIKATGIANQTVTVLVHGSNKLVLAEAERSLHDALCVIRCLVRQRALIAGGGAPETEVALQLSRYAQTITGVDAYCFRAFSDALEVIPLTLAENAGLNSISTVTELRNRHAQGEKTAGINVRKGAVTNILEEEVVQPLLVSTSAITLATETVRSILKIDDIFDEYGRPFIIIRDQEREKRLTGLDALKSHILAGRTIANTLKSSLGPKGLDKMMVSSDGDVTVTNDGATILKLMDVDHEIAKLMVQLSQSQDDEIGDGTTGVVVLAGALLEQAEILLDKGIHPIRIADGFEMAAQCAAKHLETISDSFPIDPKNEPLIQTAMTTLGSKIVNKCHRQMAEIAVNAVIAVADMEKRDVNFELIKMEGKVGGQLEDTMLVKGVVIDKDFSHPQMPKVLKDVKLAILTCPFEPPKPKTKHKLDVTSVEDYRALRQYEQEKFSEMVQQVKDAGATLAICQWGFDDEANHLLLQRELPAVRWVGGPEIELIAIATDGRIVPRFEELTPEKLGYAGIVRELHFGTTKEKMLVIEQCKNSRAVTIFIRGGNKMIIEEAKRSMHDALCVVRNLVQDERVVYGGGASEISCAIAVSEQANKISSLEQYAFRGFAEALECVPMALAENSGLSPIHTLTEVKARQIKEKNAALGIDCMLKGTCDMKEQHVIETLHSKKQQIVLATQLVKMILKIDDIRAKDVRFGADVRALMLQGVDILADAVAVTMGPKGRNVILEQSWGSPKITKDGVTVAKGIELKDKFQNIGARLVQDVANNTNEEAGDGTTTATVLARAIAKEGFEKISKGANPIEIRRGVMSAVDSVIEHLKTLSRPVTTPEEIAQVATISANGDGNLISDAMKKVGKEGVITVKDGKTLNDELEVIEGMKFDRGYISPYFMNTAKGAKVEYQDCLVLFSEKKISSVQSIIPALELANRKPLVIVAEDIDGEALSTLVVNRLKIGLQVAAVKAPGFGDNRKSTLVDMAIATGGIVFGDDANMVKLEDVQISDLGVVGEVSITKDDTLFLKGKGKKEDIDRRTENIRDQIENTTSEYEKEKLQERLARLASGVALLKVGGSSEVEVNEKKDRVNDALNATRAAVEEGIVPGGGTALLRCIPILGKLKGSNPDQQTGIEIVMKALRMPCMTIAKNAGIDASVVVSKVGYDALNNEYVNMIEKGIIDPTKVVRTALTDAAGVASLLTTAEAVVTEIPKYNFKKIMVVPPAKDFIDIILSKTQRKTPTVVHKHYKISRIRQFYMRKVKYTQANFHERLSQIIQDFPKLDNIHPFYADLMNVLYDKDHYKLALGQLNTARHLIDNVSKDYLRLMKFGDSLYRCKQLKRAALGRMATIMKRQAPNLQYLEHVRQHLSRLPTIDPYTRTIIICGFPNVGKSSFINKVTRADVEVQPYAFTTKSLYVGHMDYRYLRWQVIDTPGILDHALEERNIIEMQAVTALAHLRACVLYVMDLSEQCGRTVEEQVKLFESIKPLFSNKPLIVALNKADVTSLSELNEQGVIEVKVQACEKLLAHRVEGKMRSKKRLHVAIPKPRDKQRPPLIPKLERDLEVELGDDYTLDLCKKYEKYDTIPEFWEGHNIADYIDPKEHINVVFIGHVDAGKSTIGGQIMYLTGMVDKRTLEKYEREAKEKNRETWYLSWALDTNLEEREKGKTVEVGRAFFETERKHFTILDAPGHKSFVPNMIGGAAQADLAVLVISARKGEFETGFDRGGQTREHAMLVKTAGVKHLVVLINKMDDHTVDWSEERYNECKEKLLPYLKKIGFNPQKDLTFMPCSGLSGLGLCPWYRGDAFIPYIDLPSMCRNMEGPFIMPVVDKYKDMGTVVMGKVEAGETKKGQSLLLMPNRTPVIVDQLWSDDEEVTAVSSGENVKIKLKGIEEEDVSPGFVLCDASNPTKTGRIFDAQVVILEHKSIICAGYSAVMHIHCVAEEVTVKALICLVDKKTGEKSKTRPRFVKQDQVAIMRIEICLEPFKLFPQMGRFTLRDEEIRVMMDKKKNIRNMSVIAHVDHGKSTLTDSLVSKAGIIASAKAGETRFTDTRKDEQERCITIKSTAISMYFELEDKDLVFIGFLINLIDSPGHVDFSSEVTAALRVTDGALVVVDCVSGVCVQTETVLRQAIAERIKPVLFMNKMDRALLELQLEQEELFQTFQRIVENVNVIIATYSDGPMGEVRVDTSKGSVGFGSGLHGWAFTLKQFAEMYAEKFKIKLMNRLWGENFFNPKTKKWRSFCMYVLDPIYKFDCIMNKKEATAELLKKLLKHEDIDKDGKQLLKVVMRTWLPAGEALLQMIAIHLPSPVVAQKYRMEMLYEGPLDDEAAKNCDPNAPLMMYISKMVPTTDKGRFYAFGRVFSGKVATGMKARIMGPNYLPGKKEDLYEKAIQRTILMMGRYVEAIEDVPCGNICGLVGVDQFLVKTGTISTFKDAHNMRVMKFSVSPVVRVAVEPKNPADLPKLVEGLKRLAKSDPMVQCLIEESGEHIIAGAGELHLEICLKDLEEDHACIPIKKSDPVVSYRETVSEESNQTCLSKSPNKHNRLFMRACPMPDGLAEDIDKGVNPRDDFKSRARYLCDKYEYDITEARKIWCFGPDGTGPNILIDCTKGVQYLNEIKDSVVAGFQWATKEGVLSEENLRAVRFNIYDVTLHADAIHRGGGQIIPTTRRCLYACLLTASPRLMEPVYLCEVQCPEVAVGGIYGVLNRRRGHVFEEMQITGTPMFVVKSYLPVNESFGFTADLRSNTGGQAFPQSVFDHWQILPGDPRPYGIVQDIRKRKGLKEGLPDLAQYLDKLDSGASDTYPMQCSALRKNGFVMLKARPCKIVEMSTSKTGKHGHAKVHLVGLDIFSSKKYEDICPSTHNMDVPFVKREDYQLTDISDDGFLSLMDNGDLREDLKVPDGTVLKSCGEECVIATRTYDMHITYDKYYQTPRLWLCGYDEARRPLTVDQVYEDVSQDHAKKTVTMETHPHLPGPPMASVHPCRHAEVMVKIIQTVTEGGGELGVHMYLIIFLKFVQAVIPTIEYDYMGRRPARCYRYCKNKPYPKSRFCRGVPDPKIRIFDLGKKKARVDDFPLCVHLVSDEYEQLSSEALEAGRICCNKYLVKNCGKDQFHIRMRLHPFHVIRINKMLSCAGADRLQTGMRGAFGKPQGTVARVHIGQPIMSVRSSDRHKASVIEALRRAKFKFPGRQKIYVSKKWGFTKYERDEYEDLKNGGRLEQDGCNVKYRPEHGPLFDHMKLKEELLRGIYAYGFEKPSAIQQRAIMPCVKGHDVIAQAQSGTGKTATFSISILQQIDTTLNECQALILAPTRELAQQIQKVVIALGDFMKANCHACIGGTNVREDIRRLEHVVVGTPGRVYDMINRGALRTNYIKIFVLDEADEMLSRGFKDQIHDVFKQLQVILLSATMPQEVLEVSTCFMRNPIRILVKKEELTLEGIKQFFVNVEREDWKLDTLCDLYDTLSITQAVIFCNTRRKVDWLTENMHHRDFTVSAMHGDMEQKERDVIMRQFRTGSSRVLITTDLLARGIDVQQVSLVINYDLPSNRENYIHRIGRGGRFGRKGVAINFVTSEDKRTLKDIEQFYNTAIEEMPKNVADLIFENNNEIGVFAKLTNAYCLVGIGGSENFYSAFEAELGETIPVIHASITGCRIVGRLTVGNRNGLLIPNSATDQELQHLRNSLPDSVKVQRVEERLSALGNVIACNDYVAIVHPDLDKETEEVLADTLGVEVFRQTVASNALVGTYCVLNDQGGLVHPHTSVADQEELSSLLQVPLVAGTVNRGSEVLGGGMVVNDFCAFCGLDTTSTELSVIESVFHLSIAPSIFGAEDMKKAIACLLFGGSRKRMPDGLTRRGDINVLLLGDPGTAKSQLLKFAEKVSPIGVYTSGKGSSAAGLTASVNRDPATRNFVMEGGAMVLADGGVVCIDEFDKMKEDDRVAIHEAMEQQTISIAKAGITTTLNSRCSVLAAANSIYGRWDETKGEDNIDFMPTILSRFDTIFIVKDEHCGPRLSQAAGEKLKSRYIMMRNGTKEHELETEKRLSIPITVRQLEAIIRIAESLAKMQLQPFATESHINEALRLFQVSTLNAAMSGSLAGVEGFTTQEDHDMIVRIEQNLKKRFPIGVQVSENNVIQDFIRQKYPERAIYKVIHTMIRRGELQYRLQRKMLYRLQKAIDLVTQATAEDKKKNYAEALRLYEHGVEYFLHAIKYEVQGEKSKDSLRAKCVQYLERAEKLKKKLQAKLEGAIVVEKPCVKWTDVAGLEGAKEALKEAVILPIRFPHLFTGKRIPWKGILLFGPPGTGKSYLAKAVATEANNSTFFSVSSSDLVSKWLGESERLVKS-----------------------------------------------------------------------------------------------------------------------------------------------------------------------------------------------------------------------------AVPAHRYTPLKENWMKIFTPIVEHLHLQIRFNLRTRHVEIRTCKETDISYLQKAADFVKAFVLGFEIDDALALLRLDDLFLESFEIQDVKPLKGDHLSRAIGRLAGKGGRTKFTIENVTKTRIVLADSKIHILGSFQNIALARAISNLIMGSPPSKVYGIFTPTNQIRLTNVAVVRIKKGGKRFEIACYKNKVVSWRNNVEKDIDEVLQTHTVFENVSKGKAAKREDLIKAFGEDHTEICKEILANGELQVSDRERHSQLDALFKDIATTVADKCVNPETKRPYPVSLIEKAMRDAHFSVKPNRNAKQQALEVIPMLRMFLTRSEYDRGVNTFSPEGRLFQVEYAIEAIKLGSTAIGISTSEGIVLAVEKRITSPLMEPSTIKKIVEVDRHVGCAVSGLMADSRTLIDRARVEAQHHWFVYNEKMTVESVAQAVSNLAIQFGDSDDDSMSRPFGVAILFAEKGPQLFHMDPSGTYLQFDAKAIGSGSEGAQQSLQEVYHKSMTLKEAINSALTILKQVMEEKLNSTNVEYDRAVTVFSPDGHLLQVEYAQEAVRKGSTAVGVRGKDVVVLGVEKKSVAKLQEERTVRKVCLLDDHIVMAFAGLTADARVLINRAQVECQSHKLTVEDPATLEYITRYIAELKQAYTQSNGRRPFGISCLLGGFDPDGPRLYQTEPSGIYYEWKANATGHSAKTVLEFLEKYYTVEEVAAEKGAVKLAIRALLEVVQSGLKNLEVAVMRYDTRTTIFSPEGRLFQVEYAIEAIGHAGTCLGILASDGILLAAERRNTNKLLDEVFFSEKIYKINEDMVCSVAGITSDANVLTNELRVIAQRYLLNYGESIPCEQLVSWLCDIKQAYTQYGGKRPFGVSILYMGWDKHYGYQLYQSDPSGNYSGWKATCIGNNSAAAVSILKQEYKEGATTLQEAKRLAIKVLSKTLDMTKLSSEKLEMATLVRYSFSLTTFSPSGKLVQIEYALAAVEAGARSVGIKASNGVVIATEKVPKSILVDEHSVHRVEEVTKHIGMVYSGMGPDYRLLVKTARKKAQQYEMVYQEPIPTAQLVQRVASVMQEYTQSGGVRPFGVSLLVCGWRPYLFQCDPSGAYFAWKATAMGKNYINGKTFLEKRYNEDLELEDAVHTAILTLKEGFEGQMTADNIEVGICGFRRLDPATVKDAGFDRHITIFSPEGRLYQVEYAFKAINQSGLTSVALKGTDIAVVATQKKVPDKLMDPNSVTHLFQLTDHVGCVMTGMIADSLAQVQRARYEASNFRYKNGYEMPVDVLCRRIADINQVYTQNAEMRPLGCSMILIGYDDEGPCVYKTDPAGYYSGYKATSAGAKQTEANSFLEKKLKKKEAVQLAITCLSTVLSVDFKPTELEVGIVTQDDKKFRKLNE--MAGKNELACVYAALILVDDEVPITGDKIQTILKAANVEVEPYWPGLFAKALEGISVKDLITNVGSSKVSRETLYECVEALLKASKKRKFLETVELQIGLKNYDPQKDKRFSGTVKLKHIPRPKMSVCILGDQQHCDEAKANNVPFMDVEALKKLNKNKKAVKKLAKKYDAFLASEALIKQIPRLLGPGLNKAGKFPGLLSHQEMMKIDEVKATIKFQMKKVLCLSVAVGNVGMPVDDLVQNVHLSTNFLVSLLKKHWQNVRSLHIKSSMGPPQRLYMPPKFDPSEVKIVYLRCVGGEVGATSSLAPKIGPLGLSPKKVGDDIAKATADWKGLKITVQLTIQNRQAAISVVPSAASLIIKSLKEPPRDRKKVKNVKHSGNLSFDEILGIAKQMRRSMSRKLEGTVKEILGTAQSVGCTVEGKNPHEVIDQINDGELEIPMGAYKYMQEIYRKKQSDVLRFLLRIRVWQYRQLTRMHRAPRPSRPDKARRMGYRAKQGYCIFRIRIRRGGRKRPVPKGCTYGKPKSQGVNQLKPTRNLQAMAEDRVGRRCGNLRVLNSYWVAQDSTYKYYEIILIDPSHKAIRRDAKINWICGAVQKHREMRGKTSAGRKSRGLGKGHRYTQTIGGSRRACWLRRNSLQLRRKRMGRYAREPDNATKSCKARGTNLRVHFKNTRETAQAIKKMPLRRAFKYLKNVTSFKECVPFRRFNGGVGRCAQAKQFGTQGRWPKKSAEFLLQLLKNAESNADYKGLDVDRLVIEHIQVNRAPCLRRRTYRAHGRINPYMSSPCHIEVVLTEKEMKVGLCAYSGYKIYPGHGKTMVKQDGKVFTFLNAKCESSHLMKRNPRKVTWTVLYRRKHKKGQEEEQAKRRTRRTQKFQRAVVGASLSDILAKRNMKPEVRKAQREQAIRRKIRTSVHFHRPKTFRAPRNPKYPRKSVPRRDRMDAYNIIKYPLTTEAAMKKIEDSNTLVFLVHTRANKHHIRAAVKKLYKINVAKVNTLIRPDGKKKAYVKLARDYDALDEANKIGII------------MSFYPKKRSRRHRGKVKAFPADDPSKPVHLTAFIAYKAGMTHIVREADRPGSKVNKKEIVEAVTILEAPPMVIVGITGYIETPHGLRSLKTVWAEHLGEECRRRFYKNYKSKKRAFTKASTKWKEEMGKKEIEKDLNKIKKYCKVVRVIAHTQMKLLKKRQKKAHIMEIQLNGGTVAEKVEWARERLEKTMSLTQVFAQDEMIDCIGVTKGHGYKGVTSRWHTKKLPRKTHKGLRKVACIGAWHPSRVQFTVARAGQKGYHHRTEINKKIYRIGQGKVIKNNASTEYDLSEKSITPMGGFPHYGEVNNDFLMIKGCVMGSKKRVITLRKSLLVHTKRAALEKINLKFIDTSSKFGHGRFQTPADKKSAINEVVTREYTINLHKRLHGVGFKRRAPRAVKEIRKFAEKHMGTPDVRVDTRLNKQVWSKGIRNVPFRIRLRLSRRRNDDEDSPHKLYTLVTYVPVANFKGLQTENVDIIKKRIKKFTRHQSDRYVKLRRNWRKPKGIDNRVRRRFKGQYLMPNIGYGSNKKTRHMLPSGFKKVLVHNVKELEVLMMQNRKYCGEIAHAVSSKKRKLIVERAQQLSIRLTNGNARLRSEENEKGHKTTRRSRLRGKHTKFCRDLVREVCGHAPYEKRAMELLKVSKDKRALKFLKRRLGTHIRGKRKREELSNILTQMRKMTKGTSSFGKRRNKTHTLCRRCGRSAYHIQKSKCAQCGYPSRKLRHYNWSIKAQRRKTTGTGRMRYLKIVHRRFRNGFREGXXXXXXXXXXXXXXXXXXXXXXXXXXXXXXXXXXXXXXXXXXXXXXXXXXXDKATWKANYFTKLITLLDDYPKCFIVGANNVGSKQMQQIRMSLRGMGTVLMGKNTMMRKAIRGHLERNPALEKLLPYIRGNVGFVFTRGDLVEVRDKLLENKVRAPARAGAIAPCPVIIPAQNTGLGPEKTSFFQALSIPTKISKGTIEIINDVHILKEGDKVGASDATLLNMLNISPFSYGLLVEMVYDSGTIFEPLILDIKPEDLRVKFTEGVSRVASLCLSIGYPTLASAPHSIINGFKNLLAIAAATDFKEANTVKEFLKDPSKFVDPFTRKDWYDVKAPSIFTKRQIGKTLVNRTQGTRIASEGLKGRVFEVSLADLQDDERSFRKFKLIAEDVQGRNVLTNFNGMDLTTDRLRSMVKKWQSLIEANVDVKTTDGYLLRVFCIGFTQKSQRKTCYAQHTQVRAIRKKMVELITQNVVSSDLKDVVNKLLPDSIAKDIEKACQGIYPLHDVYIRKVKVLKKPRFDLSKLLELHGPEGYEPPVQETVMLMPKKNRISIYEYLFKEGVMVAKKDFHAPKHIPNLHVIKAMQSLKSRGFVNEQFAWRHFYWYLNNEGITYLRDFLHLPAEIVPATLKEKAFQKQPGVFLNRKKRGRHYRSVGLGFKTPREAIEGTYIDKKCPFTGNVSIRGRILTGVVQKMKMQRTIVIRRDYLHYIRKYNRFEKRHRNMSVHLSPCFRDVNTGDVVTVGECRPLSKTVRFNVLKVTKHRIRITLTSRNVRSLEKVCSDLINGAKKQQLRIKGPVRMPTKTLRITTRKTPCGEGSKTWDRFQMRIHKRVIDLHSSSEIVRQITSISIEPGVEVEVTIADTIRTRKVLSNRLLCRKQMVVDVIHPGQASIAKTVIREKLAKMYKVAMDTIFVFGFKTAFGGGKTTGFGLIYDTLDFAKKFEPKYRLARHGLFERKQRKERKNRMKKVRGTKKVRDKLNNQVLFDKPTYEKLLKEVPAYKLITPSVVSERLKIRGSLARRALEELLQKGLIKQVIKHHAQVIYTRTTRGPKKHLKRLNAPKAWMLDKLGGVFAPRPSTGPHKLRESLPLVIFLRNRLKYALTNCETKKIVMQRLIKVDGKVRTDPNYPAGYMDVVTIEKTGEFFRLIYDVKGRFTIHRITAEEAKYKLCKVKRVQTGPKGIPFLVTHDGRTIRYPDPIIKVNDTIQLDIASSKIMDSIRFDSGNLCMITGGRNLGRVGAVVNRERHPGSFDIVHVKDSQGHTFATRLHNVFIIGKGLKPYISLPRGKGVKLSIAEERDKRMKLNVAYPATGCQKLFEIVDEHKLRIFYEKRMGAEVEADSLGDEWKGYIVRVAGGNDKQGFPMKQGVLTNSRVRLLLSKGHSCYRPRRTGERKRKSVRGCIVDSNLSVLALVIVKKGEQEIPGLTDGSVPRRLGPKRASKIRKLFNLTKEDDVRQYVIKRALPPKDGKRFKAPKIQRLITP-------DGFETQISQALLELEMNSDLKAQLRELHVTKAKEKKSIIIYVPVPQLKQFQKIQTRLVRELEKKFSGNHVVFIAERKILPKPTRKSKQKRPRSRTLTAVYDAILEDLVFPAEIVGKRIRVRLDGSQLTKVHLDKNQQTNIEHKVDTFSGVYKKLTGREVTFEFMGISRDHWHKRRSTGGKRKPLRKKRKFELGRPAANTKLGSHRVHTVRTRGGNRKFRALRLDTGNFSWGSECATRKTRVIDVVYNASNNELVRTKTLVKNAIVVVDATPFRQWYESHYILPLGRKKGAKLKRSKKAERKYKTRQRLSKVEPAIEEQFQTGRLLACVSSRPGQCGRADGYVLEGKELEFYMRKIKAKKLCDIVCDLLLEESNIQPVSTPVTVCGDIHGQFYDLEELFRTGGQVPDTNYIFMGDFVDRGYFSLETFTRLLTLKAKWPDRITLLRGNHESRQITQVYGFYDECQNKYGNANAWKYCCGVFDLLTVAALIDGQILCVHGGLSPDIQTLDQIRIISRNQEIPHKGAFCDLVWSDPEIDTWKVSPRGAGWLFGSVVTREFMQINRLKLICRAHQLVHEGYKYMFDDQLVTVWSAPNYCYRCGNVAGKLVSVIGDEDTCVGFLLGGVGEINKNRQPNFMVVEKSTSVSEIEECFKRFVKRDDIDIILINQNVAEMIRHCIDSHPIPAVLEIPSKDHPYDASKDSILRRAKGMFNPDEDSQIRVWVFLPIVVITFLVGVVRHYVSILLASQKDSQVMIRSRLLRENGKYIPKHSFLMRRHFFNNEETGYFKTQNPMTDPSMMTEMLKGNVTNVLPMIMIGGWINWMFSGFVTTKVPFPLTLRFKPMLQRGIELLSLDASWVSSASWYFLNVFGLRSIYTLVLGENNSADQARHIQDQMSGAAMAMPPDPMGDRYNIHSQLEHLQSKYIGTGHADTTKFEWLVNQHRDTYSSYIGHHDLLNFFAITENEAKARVRFNLMEKMLQPCGPPPEKPEDLVLVLGDLHIPHRCSSLPAKFKKLLVPGRIQHILCTGNLCTKESYDYLKTLASDVHIVRGDFDESYPEQKVVTVGQFRIGLCHGHQVVPWGDPEALALVQRQLDVDILISGHTHKFEAYEHGSKFYINPGSATGAYHPLPSFMLMDIKSATVMTYVYQLLGDEVKVERIEYKKPAGDVEKGKKLFVQRCAQCHTVEAGGKHKTGPNLHGLIGRKTGQASGFVYTDANKAKGITWGPDTLFEYLENPKKYIPGTKMVFAGLKKPQERADLIAYLQASTMENDSGDTVDLYCPRKCSASNRIIHAKDHASIQIVIATDTPKQYAICGAIRRMGESDDCIGRLAKKDGILAKNDPFADANKQDGLVHIRIQQRNGRKTLTTVQGLSSEYDLKKIVRACKKEFACNGTVIEHPEYGEVLQLQGDQRENICQWLTKTGLAKSDQLKVHGFFEARLTQSSIFKRVIDAIKDLITEATFDCNDSGMQMQAMDNSHVSLVSLNLRSDGFDKYRCDRTLTLGINLASTTKILKCAGNDDILTIKAQDDTVTFMFESQNQEKVSDYEMKLMNLDQEHLGIPETDYACKVRMPSAEFARVCRDLSQFGESVLICCTKEGVKFSSSGTVGSANVKLAQTANVDKEEEAVTIDMQEPVSLTFACRYLNHFTKATPLSSVVQLSLSADVPLVVEYAIGEMGHIRYYLAPKIGYVFAVSGPVVTAERMAGSAMYELVRVGYSELVGEIIRLEGDMATIQVYEETSGVTVGDPVLRTGKPLSVELGPGIMGSIFDGIQRPLQDIHEISQSIYIPKGVNIPALNDKASWDFKLGSHITGGDMYGIVHENTLVKHKLLLPPRDKGTVTYIAEPGSYTVKDVILETEFDGERKKYTMLQVWPVRQPRPCTEKLPANYPLLTGQRVLDSLFPCVQGGTTAIPGAFGCGKTVISQSLSKYSNSDVIVYVGCGERGNEMSEVLRDFPELTCEIDGVTESIMKRTALVANTSNMPVAAREASIYTGITLSEYFRDMGYNVSMMADSTSRWAEALREISGRLAEMPADSGYPAYLGARLASFYERAGRVKCLGNPEREGSVSIVGAVSPPGGDFSDPVTSATLGIVQVFWGLDKKLAQRKHFPSINWLISYSKYMRALDDYYDKNFPEFVSLRTKVKEILQEEEDLSEIVQLVGKASLAETDKITLEVAKLLKDDFLQQNSYSAYDRFCPFYKTVGMLRNMMGLYDMSRHAVESTAQSNKITWSTIKDSMGAILYQLSSMKFKDPQKEGEAKIKADFDQLYEDIQQAFRNLEDFPSRGAQMLMKARLKGAQKGHSLLKKKADALQMRFRQILGKIIETKTLMGEVMKEAAFSLAEAKFTTGDFNQNILQNVDKAKFKIRTKKDNVAGVTLPVFESYQDGDTYEFTGLARGGQQFAKLKKNYHKAVVLLVELASLQTSFVTLDEVIKITNRRVNAIEHVIIPRIERTLAYIVSELDELEREEFYRLKKIQDKMPQNEYMERHRKLHGRRMDYEERLRKRQAREPHKRAQQARKLRGLKAKMVNKARANEKIQMKKKIRAHEEKLTPALPVYLLDRNNTRAKVLSNMIKQKRKEKAGKWDVPIPKVKAQAESEVFKVLRTGKTKRKAWKRMVTKVTYVGEHFTRKPPKFERFIRPMALRFKRAHVTHPELKATFCLPIIGVKRNPSSPMYTSLGVITKGTVIEVNVSELGLVTQGGKIVWGKYAQVTNH------------
Brachionus_sp                  RTSGDSIRSQNVMAASALANIVKSSLGPLGLDKMLVDDIGDVTITNDGATILKLLEVEHPAAKVLVDLAELQDQEVGDGTTSVVIIAAELLKNADFLVKQKIHPTSIISGYRLACKLAVKYIQEHLSISVEELGKECIINAAKTSMASKVIGSDSEFFSNMVYEAANLVKDGKGGFIYPIKAVNVLKAHGKSARESMLVNGYALNCTVASAAMVKRVANAKIACLDFSLQKARMKLGIQIVVDDPNKLDGIRERESDITKETINKILSAGANVVLTTGGIDDLCLKYFVEAGAMAVRRCKKADLKRIAKATGAQFLTTLANLEGEETFDASMLGNAEEVVQERISDDELIL-QRTAASIILRAANDFYCDEMERSVHDALCVIKRVMESKQVVPGGGCVEAALSIYLENFATSVSSREQLAIAEFANSLLVIPKCLSVNAAKDATDLVAKLRAYHNNSQLYEKLKWYGLDLIEGKIRDNKAHGVFEPALSKVKCLKFATEAAITILRIDDMIKL--------------------------------------------------------------------------------------------------------------------------------------------------------------------------------------------------------------------------------------------------------------------------------------------------------------------------------------------------------------------------------------------------------------GMEQYCFRAFAEALEIVPYTLAENAGLNPIATVTELRNRHAQGQYTAGINVRKGLITDILEENVVQPLLVSQSAISLASETVRSILKIDDI--------------------------------------TLKSSLGPKGLDKMMVSPDGEVTVTNDGATILKMMDVENQIARLMVELSKSQDDEIGDGTTGVVVSAGALMEQAEALLDKGIHPIRIADGYEMAAKVACENLDTVAESYPIDLNNEPLVQTAMTTLGSKIINRCHRQMAEIAVNAILAVADMDRKDVDFELIKVEGKVGGKLEDTMLVKGVVIDKDFSHPQMPKQVKDAKIAILTCPFEPPKPKTKHKLDVTSVDDYKKLREYERAKFEEMVDQVKKTGCNLVICQWGFDDEASHLLLQRELPAIRWVGGPEIELVAIATGGRIVPRFSELTAEKLGYAGTVRELSFGTTRDHMLVIEECRNSRAVTIFIRGGNKMIIEEAKRALHDALCVVRNLVKDNRVVYGGGAAEISCSLAVSKAANSVASLEQYAMRAFSDALENIPIALAENSGLAPIETLADLKSRQIKENNPRLGVDCLQSGTNDMKDQQVIETLIGKKQQIYLATQLVRMILKIDDIRAKDVKFGDSARAKMLQGVDVLADAVAVTLGPKGRNVIIEQSWGSPKITKDGVTVAKAVELKCKFQNLGAKLVQDVANNTNEKAGDGTTTATVQARAIAKEGFQKISQGANPIEVRRGIMSAVESVVAELKRLSRPVTTPEEISQVATISANGDGDIISNAMKKVGKDGVITVKDGKTLNDELEIIEGLKFDRGYISPYFMNSTKGAKCEFQDAFLLISEKKISSVQELIPALELANRKQLLIIAEEVEGEALTTLVINRLKVNLQVCAVKAPGFGDNRKNILRDIAISTGATLFGDEANLTKLEEIKLDDFGQVGEVVVTKDDTLLMKGKGDAEEVERRVKQIKEEIAETTSEYEKEKLQERLAKLSNGVAVLKVGGSSEVEVNEKKDRITDALCATRAAVEEGIVPGGGVALLRSIKVLDSLTAANDDQKVGLEIVRRALKMPAYTIAQNAGKEGALIVDKIGYDASKDQYIDMVKAGIIDPTKVVRSALQDASGVASLLTTAECVIAEQPKYNFKKIITVPTAKDFIDVILSKTQRKTPTVIHKQYAIGRIRQFYTRKVKYTQQNYHDKLTQILTDFPKLDEVHPFYADLMNILYDKNHYKLALGQINMARHLIDNVSKDYSRLLKYSDSLYRCKCLKKAALGRMCTIIKRQTQSLQYLEQIRQHLTRLPSIDPNTRTLLICGFPNVGKSSFLNKVTQADVEVQPYAFTTKSLYVGHTDYKYLRWQVVDTPGILDHSLEDRNTIEMQSITAMAHLRASILYIMDVSEQCGYSIEEQVSL-HNIKALFANKPLILV---------------------------------------------------------------------------------WEKYDSIPEIMNGHNIADFVDPXXXXXXXXXXXXXXXXXXXXXXXXXXXXXXXXXXXXXXXXXXXXXXXXXXXXXXXXXXXXXXXXXXXXXXXXXXXXXXXXXXXXXXXXXXXXXXXXXXXXXXXXXXXXXXXXXXXXXXXXXXXXXXXXXXXXXXXXXXXXXXXXXXXXXXXXXXXXXXXXXXXXXXXXXXXXXXXXXXXXXXXXXXXXXXXXXXXXXXXXXXXXXXXXXXXXXXXXXXXXXXXXXXXXXXXXXXXXXXXXXXXXXXXXXXXXXXXXXXXXXXXXXXXXXXXXXXXXXXXXXXXXXXXXXXXXXXXXXXXXXXXXXXXXXXXXXXXXXXXXXXXXXXXXXXXXXXXXXXXXXXXXXXXXXXXXXXXXXXXXXXXXXXXXXXXXXXXXXXXXXXXXXXXXXXXXXXXXXXXXEIRGLMDKKKNIRNMSVIAHVDHGKSTLTDSLVSKAGIIASAKAGEARFTDTRKDEQERCITIKSTAISLFYEIPEKDFAFIHFLINLIDSPGHVDFSSEVTAALRVTDGALVVVDCVSGVCVQTETVLRQAIAERIKPILFMNKMDRALLELQFEQEDMFQTFQRIVENVNVIIATYSTGPMGDIQVDPTQGTVGFGAGLHGWAFTLREFAEMYSSKFKIKLMKRFWGDNFYSAAEKKWRGFCQFVLDPIFKVQSITNRKEEYLKLIEKLLPVEDKEK-------------------------------------------------------------------------------------------------------------------------------------------------------ITTFENAHNLKVMKFSVSPVVRVAVEAKNPADLPKLVEGLKRLAKSDPMVQCIIEESGEHIVAGAGELHLEICLKDLEEDHACIPIKVSDPVVSYRETVVDESSEMCLSKSPNKHNRLFMKAVPMPDGLPDDIDKNVNARQDFKIRARYLTEKYEYDVTEARKIWCFGPEGTGPNLFIDCTKGVQYLNEIKDSVVAGFQWATKEGPMAEENVRGVRFNLYDVTLLSDSIHRGAGQIIPTARRCLYACMLTASPRFFEPVYLVEIQCPESAVGGIYGVLNRRRGVVIEEAQVAGTPMFVVKAHLPVNESFGFTADLRSNTGGQAFPQCVFDHWQILNGSPKTRQVLDDTRKRKGLNEGLPKLDQYLDKLXXXXXXXXXXXXXXXXXXXXXXXXXXXXXXXXXXXXXXXXXXXXXXXXXXXXXXXXXXXXXXXXXXXXXXXXXXXXXXXXXXXXXXXXXXXXXXXXXXXXXXXXXXXXXXXXXXXXXXXXXXXXXXXXXXXXXXXXXXXXXXXXXXXXXXXXXXXXXXXXXXXXXXXXXXXXXXXXXXXXXXXXXXXXXXXXXXXXXXXXXXXXXXXXXXXXXXXXXXXXXXXXXXXXXXXXXXXXXXXXXXXXXXXXXXXXXXXXXXXXXXXXXXXXXXXXXXXXXXXXXXXXXXXXXXXXXXXXXXXXXXXXXXXXXXXXXXXXXXXXXXXXXXXXXXXXXXXXXXXXXXXXXXXXXXXXXXXXXXXXXXXXXXXXXXXXXXXXXXXXXXXXXXXXXXXXXXXXXXXXXXXXXXXXXXXXXXXXXXXXXXXXXXXXXXXXXXXXXXXXXXXXXXXXXXXXXXXXXXXXXXXXXXXXXXXXXXXXXXXXXXXXXXXXXXXXXXXXXXXXXXXXXXXXXXXXXXXXXXXXXXXXXXXXXXXXXXXXXXXXXXXXXXXXXXXXXXXXXXXXXXXXXXXXXXXXXXXXXXXXXXXXXXXXXXXXXXXXXXXXXXXXXXXXXXXXXXXXXXXXXXXXXXXXXXXXXXXXXXXXXXXXXXXXXXXXXXXXXXXXXXXXXXXXXXXXXXXXXXXXXXXXXXXXXXXXXXXXXXXXXXXXXXXXXXXXXXXXXXXXXXXXXXXXXXXXXXXXXXXXXXXXXXXXXXXXXXXXXXXXXXXXXXXXXXXXXXXXXXXXXXXXXXXXXXXXXXXXXXXXXXXFESSSDIGCFAKLTNSYCLVGIGASENFYSVFEGELSDHIPVVHATIGECRVVGRLTVGNRHGLLVPSSTTDQELQHIRNSLPDSVRVRRVEERLSALGNVIACNDYVAIIHPDLDKETEQIIAEVLNVEIFRHTIANNVLVGSFCVFNNLGGIVHPKTTIQEQDELSSLLQVPLVTSTVNRGSDVLGAGLIANDWIAFCGFENTAHEISIIERIFKLXXXXXXXXXXXXXXXXXXXXXXXXXXXXXXXXXXXXXXXXXXXXXXXXXXXXXXXXXXXXXXXXXXXXXXXXXXXXXXXXXXXXXXXXXXXXXXXXXXXXXXXXXXXXXXXXXXXXXXXXXXXXXXXXXXXXXXXXXXXXXXXXXXXXXXXXXXXXXXXXXXXXXXXXXXXXXXXXXXXXXXXXXXXXXXXXXXXXXXXXXXXXXXXXXXXXXXXXXXXXXXXXXXXXXXXXXXXXXXXXXXXXXXXXXXXXXXXXXXXXXXXXXXXXXXXXXXXXXXXXXXXXXXXXXXXXXXXXXXXXXXXXXXXXXXXXXXXXXXXXXXXXXXXXXXXXXXXXXXXXXXXXXXXXXXXXXXXXXXXXXXXXXXXXXXXXXXXXXXXXXXXXXXXXXXXXXXXXXXXXXXXXXXXXXXXXXXXXXXXXXXXXXXXXXXXXXXXXXXXXXXXXXXXXXXXXXXXXXXXXXXXXXXXXXXXXXXXXXXXXXXXXXXXXXXXXXXXXXXXXXXXXXXXXXXXXXXXXXXXXXXXXXXXXXXXXXXXXXXXXXXXXXXXXXXXXXXXXXXXXXXXXXXXXXXXXXXXXXXXXXXXXXXXXXXXXXXXXXXXXXXXXXXXXXXXXXXXXXXXXXXXXXXXXXXXXXXXXXXXXXXXXXXXXXXXXXXXXXXXXXXXXXXXXXXXXXXXXXXXXXXXXXXXXXXXXXXXXXXXXXXXXXXXXXXXXXXXXXXXXXXXXXXXXXXXXXXXXXXXXXXXXXXXXXXXXXXXXXXXXXXXXXXXXXXXXXXXXXXXXXXXXXXXXXXXXXXXXXXXXXXXXXXXXXXXXXXXXXXXXXXXXXXXXXXXXXXXXXXXXXXXXXXXXXXXXXXXXXXXXXXXXXXXXXXXXXXXXXXXXXXXXXXXXXXXXXXXXXXXXXXXXXXXXXXXXXXXXXXXXXXXXXXXXXXXXXXXXXXXXXXXXXXXXXXXXXXXXXXXXXXXXXXXXXXXXXXXXXXXXXXXXXXXXXXXXXXXXXXXXXXXXXXXXXXXXXXXXXXXXXXXXXXXXXXXXXXXXXXXXXXXXXXXXXXXXXXXXXXXXXXXXXXXXXXXXXXXXXXXXXXXXXXXXXXXXXXXXXXXXXXXXXXXXXXXXXXXXXXXXXXXXXXXXXXXXXXXXXXXXXXXXXXXXXXXXXXXXXXXXXXXXXXXXXXXXXXXXXXXXXXXXXXXXXXXXXXXXXXXXXXXXXXXXXXXXXXXXXXXXXXXXXXXXXXXXXXXXXXXXXXXXXXXXXXXXXXXXXXXXXXXXXXXXXXXXXXXXXXXXXXXXXXXXXXXXXXXXXXXXXXXXXXXXXXXXXXXXXXXXXXXXXXXXXXXXXXXXXXXXXXXXXXXXXXXXXXXXXXXXXXXXXXXXXXXXXXXXXXXXXXXXXXXXXXXXXXXXXXXXXXXXXXXXXXXXXXXXXXXXXXXXXXXXXXXXXXXXXXXXXXXXXXXXXXXXXXXXXXXXXXXXXXXXXXXXXXXXXXXXXXXXXXXXXXXXXXXXXXXXXXXXXXXXXXXXXXXXXXXXXXXXXXXXXXXXXXXXXXXXXXXXXXXXXXXXXXXXXXXXXXXXXXXXXXXXXXXXXXXXXXXXXXXXXXXXXXXXXXXXXXXXXXXXXXXXXXXXXXXXXXXXXXXXXXXXXXXXXXXXXXXXXXXXXXXXXXXXXXXXXXXXXXXXXXXXXXXXXXXXXXXXXXXXXXXXXXYGFSLTTFSPSGKLVQIEYALNAVAAGAPSVGIKATNGVVLATEKKQKSTLNDDRSISKIEPITSNVGMVYSGMGPDYRLLVKYARKLGQQYIQMYDDSIPTVQLVRRVADVMQEYTQSGGVRPFGVSLLIAGWVPYLYQCDPSGAYFAWKATAIGKNHINGKTFLEKRYSEKLEMEDAIHTAILTLKESFEGQMTEENIEIGVCGFRKLTPSEVKDXXXXXXXXXXXXXXXXXXXXXXXXXXXXXXXXXXXXXXXXXXXXXXXXXXXXXXXXXXXXXXXXXXXXXXXXXXXXXXXXXXXXXXXXXXXXXXXXXXXXXXXXXXXXXXXXXXXXXXXXXXXXXXXXXXXXXXXXXXXXXXXXXXXXXXXXXXXXXXXXXXXXXXXXXXXXXXXXXXXXXXXXXXXXXXXXXXXXXXXXXXXXXXXXXXXXXXXXXXXXXXXXXXXXXXXXXXXXXXXXXXXXXXXXXXXXXXXXXXXXXXXXXXXXXXXXXXXXXXXXXXXXXX-------LTESVASLLKNSKKRNFLETVELQIALKNYDPSRDKRFAGTVRLKYVPRPKFKVCVLGDERHCDEARAQGIPCMTLDDLKKLNKEKKKVAKLANSYDAFLASDSVIKQLQKVLGRGLNKAGKFPSPLNHGENLKAEELKATIKFQMKKVLCLAVAVGNVGMQCDELTSNINLSINFLVSLLKKNWQNVRSLYIKSSMGPSFRIYMPPKFDPTAIHEVTLRVTGGEGAATAALAPKIGPLGLAPKKISEDIAKNTGDWKGLRITVKLTIQNRQAKISVVPSASSLVIKALKEPPRDRKKVKNIKHDGNVSFDEIVSIARQMRRSMAKNLTGTVLEILGTAQSVGCKVDGLHPHNVIEKVNSGEYTV-------------KKQSDVMRFIQRMRTWQLRQLPAVHRATRPTRPEKARRLGFKAKQGFVVYRVRVRRGNRKRPLSKGIVYGKPKNQGINEIKPSRKLKSVAEERVGRRCGALRVLNSYWVGQDSTYKFYEVIMADPSHKTIRRDPSINWICDSVMKHRELRGLTSAGKSSRGFGKGHGYSKTIGSSRRANWKRRQTLQMHRKRMTRYSREPENPAKSVKARGSYLRVHFKNTREVGRAIQRMPLRRAVKFLKNVMEHKEIVPFKRFNGGVGRKAQCKQWGCQGRWPEKSADFVLQLLKNAEANAEVKGLDADHLVVDHVQVNQAPKTRRRTYRAHGRINPYKSSPCHIEIFLTEKEMKTELCIFSGFKIYPGHGKRVVKPDLRTLVFISRKCEASYNFKRNPRSINWTVLYRRKHKKGQVEIEAKKKSRRLAKFQRAITGATLEDIMKKRNQKPEVRKAEREQAIRXXXXXXXXXXXXXXXXXXXXXXXXXXXXXXXXXXXXXXXXXXXXXXXXXXXXXXXXXXXXXXXXXXXXXXXXXXXXXXXXXXXXXXXXXXXXXXXXXXXXXXXXXXXXXXXXXXXXXXXSHRKFEHPRCGSLGFLPRKRSRRIRGKCKAFPKDDPSKPVHLTAFIGYKAGMTHIVRDVDKLGSKLNKKETVEAVTIIETPPMVIVGVVGYIQTPKGLRTFKTVFAEHLSEDCRRRFYKNYKSKKKAFTKYSKKWKDDLGKKEIEKDFAKMVKYCQVIRVIAHTQMKLLKKRQKKAHIMEIQLNGGSVADKIKFAREHLEKQVPVSQVFSQDEMIDCIGVTKGHGYKGVTSRWHTKKLPRKTHKGLRKVACIGAWHPSRVSFTVARAGQKGYHHRTEINKKVYRIGSG---KANAKTEFDPAEKSITPMGGFPQYGIVRQDFVMVKGCIVGTKKRPITLRKSLITQTKRVAFEKIALKFIDTSSKFGHGRFQTAEEKKDVTNEIVTREYTINLHKRIHGVGFKRRAPRALTEIRKFAQKHMGTEDVRVDSRLNKYIWSKGINHVPYRVRVRLARKRNEDEDSPHKLYTLVTYVPVLTFKELQTVNVEIVKKRTKRFTRHQSDRYVKVKSNWRKPKGIDNRVRRRFKGMYLMPKIGYGSATKTRHVCPDGFKKFVVHNVKELEVLLMQNRTFSGEIAHATSARTRKAIVERAQQLNIKITNANARLRSEATDXXXXXXXXXXXXXXXXXXXXXXXXXXXXXXXXXXXXXXXXXXXXXXXXXXXXXXXXXXXXXXXXXXXXXXXXXXXXXX----TQSFGKRHNKTHTLCRRCGRSSYHIQKKRCSACGFPSARLRKYNWSEKAKRRHT-----------------------XXXXXXXXXXXXXXXXXXXXXXXXXXXXXXXXXXXXXXXXXXXXXXXXXXXGRSEWKNKYFEKIKGLIDEYPKCFIVGADNVGSSQMQKIRISLRGHAVILMGKNTMIKKAIREHLETNPNLEKLLPHIFENVGFVFTKEDLTFIRDKLLENKVAAPAKAGAIAPCDVTLPAQITSLGPEKTSFFQALQIPTKITRGTIEIVNDIHLIKKDEKVGASEATLCNMLSISPFSYGLVVKQVYDSGSVFNPSILDIKPEDLRAKFMDGVKRIAAVSLQIGYPTVASVPHSIANGFKNLLAIAAVTDFEQCKSLKEYLKDPSKFVNPFTRKEWYDVKAPAQFKTRQIGKTPVNRTAGTKIASEGLKGRVFEVSLGDLNENEDSFRKFKLIVEETQGKICLTNFHGMDLTTDKLRSMIKKRQTTIESYVDVKTTDGYVLRVFALAFTKNSTRVTSYAQHSKVKAIRKKMIEIITKEVSGTDLKEVLKKLIPDSIAKDIEKYCSYIYPLTDVYIRKVKVVKKPKYDLGRLMDMHGPDGYEPPILSSVMLMPKKDRTAIYEYLFTEGVMVAEKNFFPVNHVPNLYVIKALQSLNSRGYVTERFAWQHYYWYLTNEGIQYLREYLHLPPEIVPSTLKXXXXXXXXXXXXXXXXXXXXXXXXXXXXXXXXXXXXXXXXXXXXXXXXXXXXXXXXXXXXXXXXXXXXXXXXXXXXXXXXXXXXXXXXXXXXXXXXXXXXXXXXXXXXXXXXXXXXXXXXXXXXXXXXXXXHRIRITLTSTNVKSLEKVCSDLIDGAKKKELKVFGPVRMPTKVLRITTRKTPCGEGSKTWDRYQMRIHKRVIDLRSPSEVVRQITSISIEPGVEVEVIIADTIRTRKFMSNRLLCRRQMVVDVLHPGKPSIKKTEIREKLAHMYRTQPDVVFCFGFRTVFGGGKSSGFALIYDTLDLAKKFEPKHRLARHGLVERKQRKERKNRMKKVRGTKKXXXXXXXXXXXXXXXXXXXXXXXXXXXXXXXXXXXXXXXXXXXXXXXXXXXXXXXXXXXXXXXXXXXXXXXXXXXXXXXXXXXXXXXXXXXXXXXXXXXXXXXXXXXXXXXXXXXXXXXXXXXXXXXXXXXXXXXXXXXXXXXXXXXXXXXXXXXXXXXXXXXXXXXXXXXXXXXXXXXXXXXXXXXXXXXXXXXXXXXXXXXXXXXXXXXXXXXXXXXXXXXXXXXXXXXXXXXXXXXXXXXXXXXXXXXXXXXXXXXXXXXXXXXXXXXXXXXXXXXXXXXXXXXXXXXXXXXXXXXXXXXXXXXXXXXXXXXXXXXXXXXXXXXMKLNISNPATGAQKLIDIEDDKKLRPFMDKRISQEVDASCLGDEWKGYVVRVSGGNDKQGFPMKQGILTNNRVRLLFAKGASCYRERRSGERRRKSVKGCIVDSNLSVLALVIVKKGEQEIDGLTNRIVPRVRGPKRANKIRKLFNLTKDDDVRKYVVRKPLKAKEGKKFAAPKIQRLITPIRLQRKRXXXXXXXXXXXXXXXXXXXXXXXXXXXXXXXXXXXXXXXXXXXXXXXXXXXXXXXXXXXXXXXXXXXXXXXXXXXXXXXXXXXXXXXXXXXXXXXXXXXXXXXXXXXXXXXXXXXXXXXXXXXXXXXXXXXXXXXXXXXXXXXXXXXXXXXXXXXXXXXXXXXMGISRDNWHKRRATGGKRPQPRKKRKFELGRPAANTRLGTQRIHTIRTRGGNKKYRALRLDSGNFSWGSEGVSRKTRIIDVVYNASNNELVRTKTLTKSTIVQIDATPFRQWYEAHYALPLGRKKGSKLKRSKKTMQKYIERRKTGKVDSKIEEYFQAGRLMARLCSSPGQCGRADGYILEGKELEFY--------XXXXXXXXXXXXXXXXXXXXXXXXXXXXXXXXXXXXXXXXXXXXXXXXXXXXXXXXXXXXXXXXXXXXXXXXXXXXXXXXXXXXXXXXXXXXXXXXXXXXXXXXXXXXXXXXXXXXXXXXXXXXXXXXXXXXXXXXXXXXXXXXXXXXXXXXXXXXXXXXXXXXXXXXXXXXXXXXXXXXXXXXXXXXXXXXXXXXXXXXXXXXXXXXXXXXXXXXXXXXXXXXXXXXXXXXXXXXXXXXXXXXXXXXXXXXXXXXXXXXXXXXXXXXXXXXXXXXXXXXXXXXXXXXXXXXXXXXXXXXXXXXXXXXXXXXXXXXXXXXXXXXXXXXXXXXXXXXXXXXXXXXXXXXXXXXXXXXXXXXXXXXXXXXXXXXXXXXXXXXXXXXXXXXXXXXXXXXXXXXXXXXXXXXXXXXXXXXXXXXXXXXXXXXXXXXXXXXXXXXXXXXXXXXXXXXXXXXXXXXXXXXXXXXXXXXXXXXXXXXXXXXXXXXXXXXXXXXXXXXXXXXXXXXXXXXXXXXXXXXXXXXXXXXXXXXXXXXXXXXXXXXXXXXXXXXXXXXXXXXXXXXXXXXXXXXXXXXXXXXXXXXXXXXXXXXXXXXXXXXXXXXXXXXXXXXXXXXXXXXXXXXXXXXXXXXXXXXXXXXXXXXXXXXXXXXXXXXXXXXXXXXXXXXXXXXXXXXXXXXXXXXXXXXXXXXXXXXXXXXXXXXXXXXXXXXXXXXXXXXXXXXXXXXXXXXXXXXXXXXXXXXXXXXXXXXXXXXXXXXXXXXXXXXXXXXXXXXXXXXXXXXXXXXXXXXXXXXXXXXXXXXXXXXXXXXXXXXXXXXXXXXXXXXXXXXXXXXXXXXXXXXXXXXXXXXXXXXXXXXXXXXXXXXXXXXXXXXXXXXXXXXXXXXXXXXXXXXXXXXXXXXXXXXXXXXXXXXXXXXXXXXXXXXXXXXXXXXXXXXXXXXXXXXXXXXXXXXXXXXXXXXXXXXXXXXXXXXXXXXXXXXXXXXXXXXXXXXXXXXXXXXXXXXXXXXXXXXXXXXXXXXXXXXXXXXXXXXXXXXXXXXXXXXXXXXXXXXXXXXXXXXXXXXXXXXXXXXXXXXXXXXXXXXXXXXXXXXXXXXXXXXXXXXXXXXXXXXXXXXXXXXXXXXXXXXXXXXXXXXXXXXXXXXXXXXXXXXXXXXXXXXXXXXXXXXXXXXXXXXXXXXXXXXXXXXXXXXXXXXXXXXXXXXXXXXXXXXXXXXXXXXXXXXXXXXXXXXXXXXXXXXXXXXXXXXXXXXXXXXXXXXXXXXXXXXXXXXXXXXXXXXXXXXXXXXXXXXXXXXXXXXXXXXXXXXXXXXXXXXXXXXXXXXXXXXXXXXXXXXXXXXXXXXXXXXXXXXXXXXXXXXXXXXXXXXXXXXXXXXXXXXXXXXXXXXXXXXXXXXXXXXXXXXXXXXXXXXXXXXXXXXXXXXXXXXXXXXXXXXXXXXXXXXXXXXXXXXXXXXXXXXXXXXXXXXXXXXXXXXXXXXXXXXXXXXXXXXXXXXXXXXXXXXXXXXXXXXXXXXXXXXXXXXXXXXXXXXXXXXXXXXXXXXXXXXXXXXXXXXXXXXXXXXXXXXXXXXXXXXXXXXXXXXXXXXXXXXXXXXXXXXXXXXXXXXXXXXXXXXXXXXXXXXXXXXXXXXXXXXXXXXXXXXXXXXXXXXXXXXXXXXXXXXXXXXXXXXXXXXXXXXXXXXXXXXXXXXXXXXXXXXXXXXXXXXXXXXXXXXXXXXXXXXXXXXXXXXXXXXXXXXXXXXXXXXXXXXXXXXXXXXXXXXXXXXXXXXXXXXXXXXXXXXXXXXXXXXXXXXXXXXXXXXXXXXXXXXXXXXXXXXXXXXXXXXXXXXXXXXXXXXXXXXXXXXXXXXXXXXXXXXXXXXXXXXXXXXXXXXXXXXXXXXXXXXXXXXXXXXXXXXXXXXXXXXXXXXXXXXXXXXXXXXXXXXXXXXXXXXXXXXXXXXXXXXXXXXXXXXXXXXXXXXXXXXXXXXXXXXXXXXXXXXXXXXXXXXXXXXXXXXXXXXXXXXXXXXXXXXXXXXXXXXXXXXXXXXXXXXXXXXXXXXXXXXXXXXXXXXXXXXXXXXXXXXXXXXXXXXXXXXXXXXXXXXXXXXXXXXXXXXXXXXXXXXXXXXXXXXXXXXXXXXXXXXXXXXXXXXXXXXXXXXXXXXXXXXXXXXXXXXXXXXXXXXXXXXXXXXXXXXXXXXXXXXXXXXXXXXXXXXXXXXXXXXXXXXXXXXXXXXXXXXXXXXXXXXXXXXXXXXXXXXXXXXXXXXXXXXXXXXXXXXXXXXXXXXXXXXXXXXXXXXXXXXXXXXXXXXXXXXXXXXXXXXXXXXXXXXXXXXXXXXXXXXXXXXXXXXXXXXXXXXXXXXXXXXXXXXXXXX
Mantis_religiosa               RFSGTSVRTQNVMAACSIANIVKSSLGPVGLDKMLVDDIGDVTVTNDGATILRLLDVEHPAARVLVELAQLQDEEVGDGTTSVVIIAAELLKNADDLVKQKIHPTSIISGYRLACKEACRYIQENLAVAVEELGRECIVNAAKTAMSSKLIGADATFFSEMAVSAAEAIKDGKGGFLYPIKAINILKAHGRSARDSVLIPGYALNCTVASQAMPKKIADAKIACLDFSLQKAKMKLGVQVLVTNPEELEAIRQREGDITKERVQKILSAGANVILCTGGIDDLCLKYFVEAGAMAVRRCKKVDLKRIAKATGAAFVTSLSNMEGEESFDHSSLGEAEEVVQEQICDDELILVKRTASSIILRGPNDFYCDEMERSIHDALCVVKRVLESQSVVAGGGSVEAALSIYLENFATSLSSREQLAIAEYAKSLLVIPKSLAVNAAQDATDLVAKLRAYHNFSQTHTHLKWVGLDLYEGTVCDNVKAGVIEPAISKIKSLKFATEAAITILRIDEMIRLKSKPAEIRSSNINAAKAVADAIRTSLGPRGMDKMIQSSNGEVTITNDGATILKQMNVTHPAAKMLVELSKAQDVEAGDGTTSVVVVAGSLLEAAEKLLQRGIHPTIISDAFQRAAAKCVEILMSQPVELSDKESLIKSASTALNSKVVSQHSSLLAPLAVEAVLKNVDLKDIKVIKKLGGTVEDTQLIEGLVFTQKGPRKVEKAKIGLIQFCISPPKTDMDHNVIVSDYAAMDRVLKEERQYILNIVKQIKKSGCNVLLVQKSILRDAISDLAIHFLDKIKVMVVKDIEREDVEFVTKTLGCRPIASLDHFLPEHLASADLVEEGNSKFVKITGIQNPTVTVLVRGSNKLVLEEADRSLHDALCVIRCLVKQRALIAGGGAPETELSLKLAQHAQSITGVDAYCFRAFANALEVIPSTLAENAGLNPISTVTELRNRHAQGDSMAGINVRKGAITNILEENVVQPLLVSISAITLASETVRSILKIDDIFDEYGRPFIIIRDQQNQKRLTGVEALKSHILAGKSIATTLRTSLGPKGLDKMMVSQDGDVTVTNDGATILKMMDVDHEIAKLMVQLSQSQDDEIGDGTTGVVVLAGALLEQAELLLDKGIHPIRIADGFEFAAQCAVKHLEKIADSFPVDANNEPLIQTAMTTLGSKIVNKCHRQMAEIAVNAVMAVADMEKRDVNFELIKVEGKVGGRLEDTMLVKGVVIDKDFSHPQMPKVLKDVKIAILTCPFEPPKPKTKHKLDVTSVEDYKALRQYEQEKFSEMVDKVKNAGATLAICQWGFDDEANHLLLQRQLPAVRWVGGPEIELIAIATGGRIVPRFEELTADKLGYAGLVRELQFGTTKDRMLVIEECKNSRAVTIFIRGGNQMIIEEAKRSIHDAICVVRNLVQDNRVVYGGGAAEITCAIATSLEADKISSLEQYAFRAFSEALESIPLALAENSGLSPINTLTEVKARQVKENNPALGIDCMLKGTNDMKDQHVIETLRSKKQQILLATQVVKMILKIDDIRAKDVRFGPEVRALMLQGVDILADAVAVTMGPKGRNVILEQTWGSPKITKDGVTVAKGVELKDKFQNIGAKLVQDVANNTNEEAGDGTTTATVLARAIAKEGFEKISKGANPIEIRRGVMMAVDAIKEKLKSLSKPVTTPEEIAQVATISANGDGDLISDAMKKVGKEGVITVKDGKTLHDELEVIEGMKFDRGYISPYFINTAKGAKVEFSDCLLLLSEKKISSVQSIIPALELANRKPLVIIAEDVDGEALSTLVVNRLKIGLQVAAVKAPGFGDNRKATLQDMAISTGGIVFGDEANPVKLEDVQLSDLGQVGEISITKDDTLVLKGKGKKVEIDRRADQIRDLISNTTSDYEKEKLQERLARLSSGVAVLKVGGSSEIEVNEKKDRVNDALNATRAAVEEGIVPGGGTALLRCLSCLDNIKAANADQETGIDIVRKSLRMPCIQIAKNAGLDASVVVNKVGFDALNNEYVNLIDRGIIDPTKVVRTALTDAAGVASLLTTAEAVVTDIPKYNFKKIAVVPPAKDFVDIILSKTQRKTPTVIHKHYQISRIRQFYMRKVKFTQQNFHDRLSQIIQDFPKLDDIHPFYADLMNILYDKDHYKLALGQLNTARHLIDNVAKDYVRLLKFGDSLYRCKQLKKAALGRMATIMKRQAQNLQYLEEVRQHLARLPSIDPYTRTILICGFPNVGKSSFINKITRADVEVQPYAFTTKSLYVGHTDHKYLRWQVIDTPGILDHPLENRNVIEMQAVTALAHLRAAVLYIMDLSEQCDHSLEEQVKLFESIKPLFANKPLLIVLNKSDIVRRDELTGEGVIEVKIEACERLLAYRVDMKAKSKKRIHVAAPVQRDKPRPPCIPKLEREIEEEMGDDYVLDLKKNYYKYDIIPEIWEGHNIADYIDPKEHVNVVFIGHVDAGKSTIGGQIMNLTGMVDKRTLEKYEREAKEKSRETWYLSWALDTNQEEREKGKTVEVGRAYFETERKHFTILDAPGHKSFVPNMIGGAAQADLAVLVISARKGEFETGFDRGGQTREHAMLAKTAGVKHLVVLVNKMDDPTVEWSEARYNECKDKIMPYLRKLGFNPQKDLTFMPCSGLTGLGLCPWYRGDAFIPFIDLPSLNRKMGGPFVMPVVDKYKDMGMVVMGKVEAGEAKKGQSLLLMPNRTVVLVDQMWSDDEEVTAVGPGENVKIKLKGIEEDDVSPGFVLCDSSNPIKTGRVFDAQVVILEHKSIICAGYSAVMHIHCAAEEVTVKALICLVDKKTGDKSKTRPRFVKQDQVAIMRVEICMEQFKLFPQMGRFTLRDEEIRVMMDKKRNIRNMSVIAHVDHGKSTLTDSLVSKAGIIASAKAGETRFTDTRKDEQERCITIKSTAISMFFELEDKDLVFIGFLINLIDSPGHVDFSSEVTAALRVTDGALVVVDCVSGVCVQTETVLRQAIAERIKPVLFMNKMDRALLELQLESEELYQTFQRIVENVNVIIATYSDGPMGEVRVDPCKGSVGFGSGLHGWAFTLKQFAEMYAEKFKIKLMKRLWGENFFNPKTKKWRSFCMYVLDPIYKFDSIMNKKEEAASLMQKLLKPEDRDKDGKALLKVVMRTWLPAGEALLQMIAIHLPSPVVAQKYRMEMLYEGPHDDEAAKNCDPNAPLMMYISKMVPTSDKGRFYAFGRVFSGKVATGMKARIMGPNYVPGKKEDLYEKAIQRTILMMGRYVEAIEDVPSGNICGLVGVDQFLVKTGTITTFKDAHNMRVMKFSVSPVVRVAVEPKNPADLPKLVEGLKRLAKSDPMVQCIIEESGEHIIAGAGELHLEICLKDLEEDHACVPLKKTDPVVSYRETVSEESDQMCLSKSPNKHNRLFMKAQPMPDGLAEDIDSGVNPRDEFKARARYLSEKYEYDVTEARKIWAFGPDGTGPNLLLDCTKGVQYLNEIKDSVVAGFQWATKEGVLSEENMRAVRFNIYDVTLHTDAIHRGGGQIIPTTRRCLYACVLTAQPRLMEPVYLCEIQCPEVAVGGIYGVLNRRRGHVFEEMQVAGTPMFVVKAYLPVNESFGFTADLRSNTGGQAFPQCVFDHWQVLPGDPKPYQVVQDTRKRKGLKEGLPDLTQYLDKLDSGASVTFPMQCSALRKNGFVMLKSRPCKIVEMSTSKTGKHGHAKVHLVGIDIFNAKKYEDICPSTHNMDVPFVKREDYQLTDISDDGYLCLMDNGDLREDLKVPDGTVLKSCGEECVIATRTYDLHITYDKYYQTPRLWLFGYDENRKALTVEQMYEDVSQDHAKKTVTMENHPHLPGPPMASVHPCKHAEVMKKIIQTVTEGGGELGVHIYLIIFLKFVQAVIPTIEYDYMGRRPARCYRYCKNKPYPKSRFCRGVPDPKIRIFDLGRKKARVEDFPLCVHLVSDEYEQLSSEALEAGRICANKYMVKNCGKDQFHIRMRLHPFHVIRINKMLSCAGADRLQTGMRGAFGKPQGTVARVRIGQPIMSVRTSDRHRAAVIEALRRAKFKFPGRQKIYVSKKWGFTKYEREVYEKLKDEGRLAADGCNVKYRPEHGPLFDDMNLKEELLRGIYAYGFEKPSAIQQRAIMPCVKGHDVIAQAQSGTGKTATFSISILQQIDTSIPECQALILAPTRELAQQIQKVVIALGDFMSAQCHACIGGTNVREDMRKLEHVVVGTPGRVYDMINRRSLRTNSIKLFVLDEADEMLSRGFKDQIHDVFKTLQVILLSATMPADVLEVTSCFMRNPVRILVKKEELTLEGIKQFFVFVEREDWKLETLCDLYDTLSITQAVIFCNTRRKVDWLTESMHNRDFTVSAMHGDMEQRERDIIMRQFRTGSSRVLITTDLLARGIDVQQVSLVINYDLPSNRENYIHRIGRGGRFGRKGVAINFVTEDDKRTLKDIEQFYNTTIDEMPMNVADLI--------------------------------------------------------CVGNKNGLLVPNSTTDTELQHLRNSLPDKVRVQRVEERLSALGNVVTCNDYVALVHPDLDRETEEILTDTLNVEVFRQTVASNVLVGSYCVLSNQGGLVHPHTKVQDLDELSSLLQVPLVAGTVNRGSDVIAAGMVVNDWSAFCGMDTTSTEISVIESIFKLSIAPSIFGAEDIKKAIACLLFGGSRKRLPDGLTRRGDINILLLGDPGTAKSQLLKFVEKVAPIGVYTSGKGSSAAGLTASVTRDPATRNFIMEGGAMVLADGGVVCIDEFDKMREDDRVAIHEAMEQQTISIAKAGITTTLNSRCSVLAAANSIFGRWDETKGEENIDFMPTILSRFDMIFIVKDEHCGPRLSESAGERLKNRYVLMRSGTREHEKETEKRLSIPITVRQLEAIIRITESLAKMQLQPFVTEAHVTEALRLFQVSTLDAAMSGSLAGAEGFTTEEDHEMLTRIEKQLKRRFAIGSLVSEHNVVQDFLRQKYPERAIYKVIHTMIRRGELQHRMQRKMLFRLQKAIDLVTKATEEDRNKNYEEALRLYEHGVEYFLHAIKYEAQGERAKESIRAKCLQYLDRAEKLKKKLQAKLEGAIVVEKPCVKWSDVAGLEGAKEALKEAVILPIRFPHLFTGKRIPWKGILLFGPPGTGKSFLAKAVATEANNSTFFS--------------------------------------------------------------------------------------------------------------------------------------------------------------------------------------------------------------------------------------------------VPAHRYTPLKENWMKIFSPIVEHLHLQIRFNLKTRHVEIRTCKETDIGNLQKAADFVRAFVYGFEVEDALALLRLDDLFIESFEIKDVKPLKGDHMSRAIGRLAGKGGRTKFTIENVTKTRIVLADSKIHILGSFQNIQLARAICNLILGSPPSKVYGIFTPTNQIRLTNVAVVRMKKGGKRFEIACYKNKVVSWRNKIETDIDEVLQTHTVFTNVSKGQVAKKEDLVKAFGDDLTEICKEILSKGELQVSDKERHSQLECLFKDIATTVADKCVNPETKRPYPVSMIEKAMKDAHFSVKPNRNAKQQALDVIPLL-MFLTRSEYDRGVNTFSPEGRLFQVEYAIEAIKLGSTAIGICTSEGVVLAVEKRITSPLMEPTTIEKIVEVDKHIGCAVSGLMADSRTMIDRARVECQNHWFIYNEKMSVESVAQAVSNLAIQFGDSDDDAMSRPFGVAILFAEKGPQLFHMDPSGTFVQFDAKAIGSGSEGAQQSLQEVYHKSMTLKEALNAVLTILKQVMEEKLSSTNVEYDRAITVFSPDGHLLQVEYAQEAVRKGSTAVGVRGTDVVVLGVEKKSVAKLQEERTVRKICLLDDHVVMAFAGLTADARILINRAQIECQSHKLTVEDPVTLEYITRYIAGLKQKYTQSNGRRPFGISCLLAGFDYDGPHLYQTEPSGIYYEWKANATGRSAKTVREFLEKYYTPELVSTEKGTVKLAIRALLEVVQSGRKNLEIAVMRYDTRTTIFSPEGRLYQVEYAMEAISHAGTCLGILANDGILLAAERRNTNKLLDEVFFSEKIYKLNDDMVCSVAGITSDANVLTNELRMIAQRYLLQYGESIPCEQLVSWLCDVKQAYTQYGGKRPFGVSILYMGWDKHYGYQLYQSDPSGNYSGWKATCIGNNSAAAVSNLKQEYKEGETTLKNAMDLAIKVLSKTLDMTKLTAEKVEMATLTRYSFSLTTFSPSGKLVQIEYALAAVAAGAPSVGIKASNGVVLATENKHKSILYEEHSVHKVEIITKHIGMVYSGMGPDYRLLVKRARKMAQQYYLVYQEEIPTAQLVQRVAMVMQEYTQSGGVRPFGVSLLICGWKPYLFQCDPSGAYFAWKATAMGKSYINGKAFLEKRYSEDLELDDAVHTAILTLKEGFEGQMTADNIEVGICGFRRLDPTTVKDAGFDRHITIFSPEGRLYQVEYAFKAINQGGLTSVALKGVDTAVVATQKKVPDKLLDASTVTHLFNLTDNIGCVMTGMIADSKSQVQRARYEAANWKYKHGYDIPVDTLCRRVADISQVYTQNAEMRPLGCSMILIAYDNEGPCVYKTDPAGYYCGYKAISVGAKQTEANSYLEKKLKKKEAIQLAITCLSTVLSVDFKPTEIEVGIVTKENPKFRVLAEQEMASKAELACVYSALILADDDVAITGEKIQTILKAASVDVEPYWPGLFAKALEGISVKDLITNVGSSKVSRDTLYECIGSVLQNAKKRNFLETVEIQIGLKNYDPQKDKRFSGTVKLKHIPRPKMQVCILGDQQHCDEAKANDVPYMDVEALKKLNKNKKLVKKLAKKYDAFLASEALIKQIPRLLGPGLNKAGKFPGLLSHQEAMKIDEVKATIKFQMKKVLCLSVAVGHVGMTEDELVQNVHLSVNFLVSLLKKHWQNVRSLHVKSTMGPPQRLYMPPKFDPSEVKVVYLRCVGGEVGATSSLAPKIGPLGLSPKKVGDDIAKATSDWKGLKITVKLTIQNRQAAISVCPSAASLIIKALKEPPRDRKKQKNIKHSGNLSFDDVLNIAKTMRRSMSRKMEGTVKEILGTCQSVGCTVEGKPPHDVIDLINNGEIEVPMGAYKYITELYRKKQSDVLRFLLRIRCWQYRQLTKMHRAPRPSRPDKARRLGYKAKQGYVIFRIRVRRGGRKRPVPKGATFGKPKSHGVNQLKPTRNLQSIAEERVGRRCGGLRVLNSYWVAQDSTYKYFEVILIDPAHKAIRRDPKANWICKAVMKHRELRGLTSAGRKSRGLGKGHRYSQTIGGSRRAAWLRRNSLQLRRKRMGRYSHEPENATKSCKARGSNLRVHFKNTRETAMTLRRMALRRAVRYLKNVIEHKECVPFRRFNGGVGRCAQAKQWKTQGRWPKKSAEFLLQLLKNAESNADYKGLDVDRLVIDHIQVNRAPCLRRRTYRAHGRINPYMSSPCHIEVVLTEKEMKIGICAYSGYKIYPGHGKTMVKTDGKTFTFLNAKCESSHLMKRNPRKVTWTVLYRRKHKKGQEEEQTKKRTRRTQKFQRAIVGASLTDIMAKRNMKPEIRKAQREQAIRRKVRTSVHFHRPKTFRPPRNPKYPRKSVPKRNRMDAFNIIKFPLTTEAAMKKIEDNNTLVFIVHTRANKHHVKAAVKKLYDIDVAKVNTLIRPDGKKKAYVRLARDYDALDVANKIGIISHRKFSAPRHGSMGFYPKKRSQRHRGKVKAFPKDDPSKPVHLTAFIGYKSGMTHVVREADRPGSKVNKKEIVEAVTILETPPMVIVGVVGYIETPHGMRALKTIWAEHLSEDCRRRFYKNYKSKKKAFTKTSKKWQDDLGRKSIEKDFKKLVRYCKVIRVIAHTQMKLLKKRQKKAHIMEIQLNGGTIEQKVQWAREHLEKPVPVSQVFAPDEMIDVIGVTKGKGYKGVTSRWHTKKLPRKTHKGLRKVACIGAWHPSRVSFTVARAGQKGYHHRTEMNKKIYRIGQGKVVKNNASTEYDLTQKTITPMGGFPHYGEVNNDFVMLKGCVMGPKKRVITLRKSLLVHTKRKALEKISLKFIDTSSKFGHGRFQTAADKKSAINEVVTREYTINLHKRLHGVGFKKRAPRAIKEIRKFAIKQMGTPDVRVDTRLNKQVWSKGIRNVPFRIRVRLSRRRNDDEDSPNKLYTLVTFVQVPTFKGLQTENVDIVKKRTKHFIRHQSDRYKKLKQSWRKPKGIDNRVRRRFKGQYLMPSIGYGSNKKTKHMLPTGFRKVLVHNVKELEVLLMQNRKFCAEIAHAVSSKKRKAIVERAQQLSIRVTNANARLRSEENEKGHRTTRPSRLKGRHTKFVRDLIREVCGHAPYEKRAMELLKVSKDKRALKFLKRRLGTHIRAKRKREELSNILTQMRKMTKGTSSFGKRRNKTHTLCRRCGRSSYHIQKSKCAQCGYPSRKLRHYNWSIKAQRRKTTGTGRMRYLKLVKRRFRNGFREGMSAHKTFRIKQKLAKKLKQNRPIPQWVRMRTDNTIRYNAKRRHWRRTKLKLDKEAWKSSYFTKLVQLLDDYPKCFIVGADNVGSKQMQQIRMSLRGTAVVLMGKNTMMRKAIRGHLERNPALEKLLPHIRGNVGFVFTRGDLVEVRDKLLENKVRAPARNGAIAPCPVVIPAQNTGLGPEKTSFFQALSIPTKISKGTIEIINDVHILKEGDKVGASDATLLNMLNISPFSYGLLVEMVYDSGTIFEPAILDIKPEDLRVKFMEGVARLAAVCLSISYPTIASAPHSIINGFKNLLAIAAVTDFKEAETVKEFLKDPSKFVDPFTRKDWYDVKAPSMFTTRQIGKTLVNRTQGTKIASEGLKYRVFEVSLADLQNDERSFRKFRLIAEDVQGRNVLTNFHGMDLTTDKLRSMVKKWQTLIEANVDVKTTDGYLLRVFCIGFTNKSQRKTCYAQHTQVRSIRKKMVEIITRDISSSDLKEVVNKLLPDSIAKDIEKACQGIYPLHDVYIRKVKVLKKPRFELSKLLELHGPEGYEPPVQESVMLMPKKNRVAIYEYLFKEGVMVAKKDFHAPKHIPNLQVIKAMQSLKSRGYVLEQFAWRHFYWYLTNEGISYLRNYLHLPAEIVPATLKEKAFQKQPHLNLNRKKPLRRYRNVGLGFKTPREAIDGTYIDKKCPFTGNVSIRGRILTGVVQKMKMQRTIVIRRDYLHYIRKYNRFEKRHRNMSVHLSPCFRDVEIGDVVTVGECRPLSKTVRFNVLKVSKHRIRITLTSRNVRSLEKVCTDLINGAKKQNLRVKGPVRMPTKILRITTRKTPCGEGSKTWDRFQMRIHKRVIDLHSPSEIVKQITSISIEPGVEVEVTIAD-----------------MVVDVLHPGQPSVKKTDIREKLAKMYKVTPDLVFCFGFRTAFGGGKSTGFALIYDAMDYATKFEPKHRLQRHGLFERKQRKERKNRMKKVRGTKKVRDKLNNQVLFDKATYDKLLKEVPQYKLITPSVVSERLKVRGSLARRALDELLQKGLIKQVIKHHAQVIYTRTTRGPKKHLKRLNAPKAWMLDKLGGVYAPRPSTGPHKLRESLPLVIFLRNRLKYALTNCEVKKIVMQRLIKVDGKVRTDPNYPAGFMDVITIEKTGEFFRLIYDVKGRFTIHRISAEEAKYKLCKVKKVQTGPKGIPFLVTHDGRTIRYPDPVIKVNDTIQLDIATSKIMDSIKFDSGNLCMITGGRNLGRVGTVVNRERHPGSFDIVHIKDSNGHTFATRLNNVFIIGKATKPYISLPRGKGVKLSIAEERDKRMKLNVSFPATGCQKLFEVTDEHKLRMFYEKRMGTEVEADALGDEWKGYIVRIAGGNDKQGFPMKQGILTNGRVRLLLSKGHSCYRPRRDGERKRKSVRGCIVDSNLSVLALVIVKKGEQEIPGLTDNQIPRRLGPKRASKIRKLFNLTKEDDVRQYVIKRPLPLKEGKRHKAPKIQRLITP-------DAFETSISQALLELEMNSDLKAQLRELYITKAKEKKSIIIYVPIPQLKAFQKIQTRLVRELEKKFSGKHVVFIGERKILPKPTRKNKQKRPRSRTLTAVYDAILEDLVFPAEIVGKRIRVKLDGSQLIKVHLDKNQQTNIEHKVDTFASVYKKLTGREVTFEFMGISRDHWHKRRATGGKRKPLRKKRKFELGRPAANTKLGAKRIHTVRTRGGNKKYRALRLDQGNFSWGSECCTRKTRIIDVVYNASNNELVRTKTLVKNAIVVIDATPFRQWYESHYALPLGRKKGAKLKRSKKVEKKYKARQRLAKVESALEEQFQSSRVLACISSRPGQCGRADGYILEGKELEFYMRKIKAKKLCDMVCDLLLEESNIQPVSTPVTVCGDIHGQFYDLEELFRNGGPVPDTNYIFMGDFVDRGYYSLETFTRLLTLKAKWSDRITLLRGNHESRQITQVYGFYDECQNKYGNANAWRYCCRVFDLLTVAALIDEQVFCVHGGLSPDIQTLDQIRSIERNQEIPHKGAFCDLVWSDPEVETWAVSPRGAGWLFGAKVTHEFMQINSLKLICRAHQLVHEGYKYMFDDKLVTVWSAPNYCYRCGNIAGKLVSVIGDEDTCVGFLLGGVGEINKNRQPNFMVVDKNTSVSEIEECFKRFVRRDDIDIILINQNVAEMVRHCIDSHPIPAVLEIPSKDHPYDASKDSILRRARGMFNPDD----------------------------------------------------------MRRHFFNNEETGYFKTQNPMTDPTMMTDMLKGNVTNVLPMIVIGGWINWMFSGFVTTKVPFPLTLRFKPMLQRGIELHTLDASWVSSASWYFLNVFGLRSIYTLVLGENNAADQARHLQDQMSGAAMAMPPDPMGDRYNIHSQLEHLQSKYIGTGHADTTKFEWLVNQHRDSFASYMGHFDMLNFFAISENEAKARVRFNLMEKMLQPCGPPPEKPEDLVLVLGDLHIPHRCSSLPAKFKKLLVPGRIQHILCTGNLCTKESYDYLKTLASDVHVVRGDFDENYPEQKVVTVGQFRIGLCHGHQVVPWGEPDSLALIQRQLDVDILISGHTHKFEAYEQENKFYINPGSATGAYNPLPSFVLMDIQSSTVVTYVYQLVGDEVKVERIEYKKPDGDVEKGKKLFVQRCAQCHTVEAGGKHKTGPNLHGLFGRKTGQAAGYAYTDANKSKGITWGKDTLFIYLENPKKYIPGTKMVFAGLKKPQERADLIAYLEQATMENDAGEFVDLYCPRKCSASNRIIHAKDHASIQINIATETSKMYAICGAIRRMGESDDCINRLAKKDGILAKNDPFADAIKQDGLVHIRIQQRNGRKTLTTVQGLSSEYDLKKIVRACKKEFACNGTVIEHPEYGEVLQLQGDQRENICQWLTKAGLAKPEQLKVHGFFEARLTQSSLLKKVLEAIKDLLNEATFDCSDSGIQLQAMDNSHVSLVSMNLRSDGFDKYRCDRNLSMGINLSSMSKILKCAGNEDVVTMKAQDDTVTFVFESPNQEKVSDYEMKLMNLDQEHLGIPETDYSCVIRLPAQEFARICRDLSQFGESVVISCTKEGVKFSCAGDIGSANIKLAQTSNVDKEDQAVTIEMQEPVTLTFASRYLNSFTKATSLSNAVQLSMSPDVPLVVEYKIGDIGHIRYYLAPKIGYVFAVSGPVVTAERMSGSAMYELVRVGYYELVGEIIRLEGDMATIQVYEETSGVTVGDPVLRTGKPLSVELGPGILGSIFDGIQRPLKDINELTQSIYIPKGINIPALSRTTSWEFKIGSHITGGDMYGIVHENTLVKHKMLLPPRAKGTVTYIAPPGNYCVDDVMLETEFDGEKSKYTMLQVWPVRQPRPVTEKLPANHPLLCGQRVLDSLFPCVQGGTTAIPGAFGCGKTVISQSLSKYSNSDVIIYVGCGERGNEMSEVLRDFPELSVEIDGVTESIMKRTALVANTSNMPVAAREASIYTGITLSEYFRDMGYNVSMMADSTSRWAEALREISGRLAEMPADSGYPAYLGARLASFYERAGRVKCLGNPDREGSVSIVGAVSPPGGDFSDPVTSATLGIVQVFWGLDKKLAQRKHFPSINWLISYSKYMRSLDDFYDKNFPEFVPLRTKVKEILQEEEDLSEIVQLVGKASLAETDKITLEVAKLLKDDFLQQNSYSPYDRFCPFYKTVGMLKNMIAFYDMSRHAVESTAQSNKITWSVIRDSMGSILYQLSSMKFKDPVKDGEAKIKQDFEQLYEDIQQAFRNLED-----------------------------------------------------------------------------------------DNVAGVTLPVFESYQDGDTYELAGLARGGQQLSKLKKNYQSAVKLLVELASLQTSFVTLDEVIKITNRRVNAIEHVIIPRIEKTLQYIISELDELEREEFYRLKKIQDKMPQNEYIERHRKLYGYRLDYHERKRKREAREPHKRAEKAKKLRGLKAKMFNKQRYAEKIQMKKKIKMHEEKQTKAVPVYLLDRDQSRAKVLSNMIKQKRKEKAGKWDVPIPKVKAQADAEVFRVLKTGKSRRKAWKRMVTKVTFVGEGFTRKPPKFERFIRPMALRFKKAHVTHPELKATFCLPIIGVKKNPSSPMYTSLGVITKGTIIEVNISELGLVTQAGKVVWGKYAQVTNNPENDGCINAVLL
Anoplodactylus_eroticus        RTTGTSVRTQNVVAASSIANIVKSSLGPVGLDKMLVDDVGDVTITNDGATILNLLEVEHPAAKVLVELAQLQDQEVGDGTTSVVIIAAELLKNADELVKCKIHPTSIISGYRLACKEACKYIQENLTMSTDEVGRECVVNAAKTSMSSKLIGPDSEFFSNMVVDAAMAVKDGKGGHKYPIKAVNVLKAHGKSSRESILVNGYAVNCTVASQAMPKKITGAKIACLDFSLQKAKMHLGVQILITDPTKLDAIRERESNITKERIQKVLATGANVILTTGGIDDLCLKYFVEAGAMAVRRVKKVDLKRIAKATGA-----LANLEGEESFDASML-------------------------------------------------------------------------------------------------------------------------------------------------------------------------------------XXXXXXXXXXXXXXXXXXXXXXXXXXXXXXXXXXXXXXXXXXXXXXXXXXXXXXXXXXXXXXXXXXXXXXXXXXXXXXXXXXXXXXXXXXXXXXXXXXXXXXXXXXXXXXXXXXXXXXXXXXXXXXXXXXXXXXXXXXXXXXXXXXXXXXXXXXXXXXXXXXXXXXXXXXXXXXXXXXXXXXXXXXXXXXXXXXXXXXXXXXXXXXXXXXXXXXXXXXXXXXXXXXXXXXXXXXXXXXXXXXXXXXXXXXXXXXXXXXXXXXXXXXXXXXXXXXXXXXXXXXXXXXXXXXXXXXXXXXXXXXXXXXXXXXXXXXXXXXXXXXXXXXXXXXXXXXXXXXXXXXXXXXXXXXXXXXXXXXXXXXXXXXXXXXXXXXXXXXXXXXXXXXXXXXXXXXXXXXXXXXXXXXXXXXXXXXXXXXXXXXXXXXXXXXXXXXXXXXXXXXXXXXXXXXXXXXXXXXXXXXXXXXXXXXXXXXXXXXXXXXXXXXXXXXXXXXXXXXXXXXXXXXXXXXXXXXXXXXXXXXXXXXXXXXXXXXXXXXXXXXXXXXXXXXXXXXXXXXXXXXXXXXXXXXXXXXXXXXXXXXXXXXXXXXXXXXXXXXXXXXXXXXXXXXXXXXXXXXXXXXXXXXXXXXXXXXXXXXXXXXXXXXXXXXXXXXXXXXXXXXXXXXXXXXXXXXXXXXXXXXXXXXXXXXXXXXXXXXXXXXXXXXXXXXXXXXXXXXXXXXXXXXXXXXXXXXXXXXXXXXXXXXXXXXXXXXXXXXXXXXXXXXXXXXXXXXXXXXXXXXXXXXXXXXXXXXXXXXXXXXXXXXXXXXXXXXXXXXXXXXXXXXXXXXXXXXXXXXXXXXXXXXXXXXXXXXXXXXXXXXXXXXXXXXXXXXXXXXXXXXXXXXXXXXXXXXXXXXXXXXXXXXXXXXXXXXXXXXXXXXXXXXXXXXXXXXXXXXXXXXXXXXXXXXXXXXXXXXXXXXXXXXXXXXXXXXXXXXXXXXXXXXXXXXXXXXXXXXXXXXXXXXXXXXXXXXXXXXXXXXXXXXXXXXXXXXXXXXXXXXXXXXXXXXXXXXXXXXXXXXXXXXXXXXXXXXXXXXXXXXXXXXXXXXXXXXXXXXXXXXXXXXXXXXXXXXXXXXXXXXXXXXXXXXXXXXXXXXXXXXXXXXXXXXXXXXXXXXXXXXXXXXXXXXXXXXXXXXXXXXXXXXXXXXXXXXXXXXXXXXXXXXXXXXXXXXXXXXXXXXXXXXXXXXXXXXXXXXXXXXXXXXXXXXXXXXXXXXXXXXXXXXXXXXXXXXXXXXXXXXXXXXXXXXXXXXXXXXXXXXXXXXXXXXXXXXXXXXXXXXXXXXXXXXXXXXXXXXXXXXXXXXXXXXXXXXXXXXXXXXXXXXXXXXXXXXXXXXXXXXXXXXXXXXXXXXXXXXXXXXXXXXXXXXXXXXXXXXXXXXXXXXXXXXXXXXXXXXXXXXXXXXXXXXXXXXXXXXXXXXXXXXXXXXXXXXXXXXXXXXXXXXXXXXXXXXXXXXXXXXXXXXXXXXXXXXXXXXXXXXXXXXXXXXXXXXXXXXXXXXXXXXXXXXXXXXXXXXXXXXXXXXXXXXXXXXXXXXXXXXXXXXXXXXXXXXXXXXXXXXXXXXXXXXXXXXXXXXXXXXXXXXXXXXXXXXXXXXXXXXXXXXXXXXXXXXXXXXXXXXXXXXXXXXXXXXXXXXXXXXXXXXXXXXXXXXXXXXXXXXXXXXXXXXXXXXXXXXXXXXXXXXXXXXXXXXXXXXXXXXXXXXXXXXXXXXXXXXXXXXXXXXXXXXXXXXXXXXXXXXXXXXXXXXXXXXXXXXXXXXXXXXXXXXXXXXXXXXXXXXXXXXXXXXXXXXXXXXXXXXXXXXXXXXXXXXXXXXXXXXXXXXXXXXXXXXXXXXXXXXXXXXXXXXXXXXXXXXXXXXXXXXXXXXXXXXXXXXXXXXXXXXXXXXXXXXXXXXXXXXXXXXXXXXXXXXXXXXXXXXXXXXXXXXXXXXXXXXXXXXXXXXXXXXXXXXXXXXXXXXXXXXXXXXXXXXXXXXXXXXXXXXXXXXXXXXXXXXXXXXXXXXXXXXXXXXXXXXXXXXXXXXXXXXXXXXXXXXXXXXXXXXXXXXXXXXXXXXXXXXXXXXXXXXXXXXXXXXXXXXXXXXXXXXXXXXXXXXXXXXXXXXXXXXXXXXXXXXXXXXXXXXXXXXXXXXXXXXXXXXXXXXXXXXXXXXXXXXXXXXXXXXXXXXXXXXXXXXXXXXXXXXXXXXXXXXXXXXXXXXXXXXXXXXXXXXXXXXXXXXXXXXXXXXXXXXXXXXXXXXXXXXXXXXXXXXXXXXXXXXXXXXXXXXXXXXXXXXXXXXXXXXXXXXXXXXXXXXXXXXXXXXXXXXXXXXXXXXXXXXXXXXXXXXXXXXXXXXXXXXXXXXXXXXXXXXXXXXXXXXXXXXXXXXXXXXXXXXXXXXXXXXXXXXXXXXXXXXXXXXXXXXXXXXXXXXXXXXXXXXXXXXXXXXXXXXXXXXXXXXXXXXXXXXXXXXXXXXXXXXXXXXXXXXXXXXXXXXXXXXXXXXXXXXXXXXXXXXXXXXXXXXXXXXXXXXXXXXXXXXXXXXXXXXXXXXXXXXXXXXXXXXXXXXXXXXXXXXXXXXXXXXXXXXXXXXXXXXXXXXXXXXXXXXXXXXXXXXXXXXXXXXXXXXXXXXXXXXXXXXXXXXXXXXXXXXXXXXXXXXXXXXXXXXXXXXXXXXXXXXXXXXXXXXXXXXXXXXXXXXXXXXXXXXXXXXXXXXXXXXXXXXXXXXXXXXXXXXXXXXXXXXXXXXXXXXXXXXXXXXXXXXXXXXXXXXXXXXXXXXXXXXXXXXXXXXXXXXXXXXXXXXXXXXXXXXXXXXXXXXXXXXXXXXXXXXXXXXXXXXXXXXXXXXXXXXXXXXXXXXXXXXXXXXXXXXXXXXXXXXXXXXXXXXXXXXXXXXXXXXXXXXXXXXXXXXXXXXXXXXXXXXXXXXXXXXXXXXXXXXXXXXXXXXXXXXXXXXXXXXXXXXXXXXXXXXXXXXXXXXXXXXXXXXXXXXXXXXXXXXXXXXXXXXXXXXXXXXXXXXXXXXXXXXXXXXXXXXXXXXXXXXXXXXXXXXXXXXXXXXXXXXXXXXXXXXXXXXXXXXXXXXXXXXXXGSGASLTYPMQCSALRKNGFVIIKDHPCKIIEMTTSKTGKHGHAKVHLVGIDIFTQKKYEDICPSTHNMPVPNVNRTD-QLLDVD-DGFLSLME----KDDLKLPPDTVLSAMDIEQAIAXXXXXXXXXXXXXXXXXXXXXXXXXXXXXXXXXXXXXXXXXXXXXXXXXXXXXXXXXXXXXXXXXXXXXXXXXXXXXXXXXXXXXXXXXXXXXXXXXXXXXXXXXXXXXXXXXXXXXXXXXXXXXXXXXXXXXXXXXXXXXXXXXXXXXXXXXXXXXXXXXXXXXXXXXXXXXXXXXXXXXXXXXXXXXXXXXXXXXXXXXXXXXXXXXXXXXXXXXXXXXXXXXXXXXXXXXXXXXXXXXXXXXXXXXXXXXXXXXXXXXXXXXXXXXXXXXXXXXXXXXXXXXXXXXXXXXXXXXXXXXXXXXXXXXXXXXXXXXXFDDMNLRESLLRGIFAYGFEKPSAIQQRAIIPCIKGLDVIAQAQSGTGKTATFSISILQQIDTSLRECQALILAPTRELAQQIQKVVLSLGDYMNAQCHACIGGTNVKDDMRKLDHIVVGTPGRVYDMMQRGALRRDEIKIFVLDEADEMLSRGFKDQIYDVYKSLQIILLSATMPHDVMEVTKYFMNNPIRILVKREELTLE------------------------------------------------------------------------------------------------------------------------------------------------------------------XXXXXXXXXXXXXXXXXXXXXXXXXXXXXXXXXXXXXXXXXXXXXXXXXXXXXXXXXXXXXXXXXXXXXXXXXXXXXXXXXXXXXXXXXXXXXXXXXXXXXXXXXXXXXXXXXXXXXXXXXXXXXXXXXXXXXXXXXXXXXXXXXXXXXXXXXXXXXXXXXXXXXXXXXXXXXXXXXXXXXXXXXXXXXXXXXXXXXXXXXXXXXXXXXXXXXXXXXXXXXXXXXXXXXXXXXXXXXXXXXXXXXXXXXXXXXXXXXXXXXXXXXXXXXXXXXXXXXXXXXXXXXXXXXXXXXXXXXXXXXXXXXXXXXXXXXXXXXXXXXXXXXXXXXXXXXXXXXXXXXXXXXXXXXXXXXXXXXXXXXXXXXXXXXXXXXXXXXXXXXXXXXXXXXXXXXXXXXXXXXXXXXXXXXXXXXXXXXXXXXXXXXXXXXXXXXXXXXXXXXXXXXXXXXXXXXXXXXXXXXXXXXXXXXXXXXXXXXXXXXXXXXXXXXXXXXXXXXXXXXXXXXXXXXXXXXXXXXXXXXXXXXXXXXXXXXXXXXXXXXXXXXXXXXXXXXXXXXXXXXXXXXXXXXXXXXXXXXXXXXXXXXXXXXXXXXXXXXXXXXXXXXXXXXXXXXXXXXXXXXXXXXXXXXXXXXXXXXXXXXXXXXXXXXXXXXXXXXXXXXXXXXXXXXXXXXXXXXXXXXXXXXXXXXXXXXXXXXXXXXXXXXXXXXXXXXXXXXXXXXXXXXXXXXXXXXXXXXXXXXXXXXXXXXXXXXXXXXXXXXXXXXXXXXXXXXXXXXXXXXXXXXXXXXXXXXXXXXXXXXXXXXXXXXXXXXXXXXXXXXXXXXXXXXXXXXXXXXXXXXXXXXXXXXXXXXXXXXXXXXXXXXXXXXXXXXXXXXXXXXXXXXXXXXXXXXXXXXXXXXXXXXXXXXXXXXXXXXXXXXXXXXXXXXXXXXXXXXXXXXXXXXXXXXXXXXXXXXRKIPVPRHRYGPLKENWLKIFSPVVEHLHLQIRFNLKTRQVEIKTCKDTDIGSLQKAADFVTAFTLGFEIEDALALIRLDDLFLESFEISDVKPLKGDHLSRAIGRIAGKGGRTKFTIENVTKTRIVLADSKIHILGSYQNMRNARAICNLILGSPPSKVYGIFTPTNQIRLTNVAIVRMKKCGKRFEIACYPNKV-SWRKKIEKDIDEVLQTH-VFLNVSKGQVAKKEDLQKAFNDDQ-EICQKILAKGELQVSGKERQ-QLEATLKDIAT-VADKCVNPKTKRPYPVT-IETSMKEIHYSVKPNRSAKQQALEVIKKL-XXXXXXXXXXXXXXXXXXXXXXXXXXXXXXXXXXXXXXXXXXXXXXXXXXXXXXXXXXXXXXXXXXXXXXXXXXXXXXXXXXXXXXXXXXXXXXXXXXXXXXXXXXXXXXXXXXXXXXXXXXXXXXXXXXXXXXXXXXXXXXXXXXXXXXXXXXXXXXXXXXXXXXXXXXXXXXXXXXXXXXXXXXXXXXXXXXXXXXXXXXXXXXXXXXXXXXXXXXXXXXXXXXXXXXXXXXXXXXXXXXXXXXXXXXXXXXXXXXXXXXXXXXXXXXXXXXXXXXXXXXXXXXXXXXXXXXXXXXXXXXXXXXXXXXXXXXXXXXXXXXXXXXXXXXXXXXXXXXXXXXXXXXXXXXXXXXXXXXXXXXXXXXXXXXXXXXXXXXXXXXXXXXXXXXXXXXXXXXXXXXXXXXXXXXXXXXXXXXXXXXXXXXXXXXXXXXXXXXXXXXXXXXXXXXXXXXXXXXXXXXXXXXXXXXXXXXXXXXXXXXXXXXXXXXXXXXXXXXXXXXXXXXXXXXXXXXXXXXXXXXXXXXXXXXXXXXXXXXXXXXXXXXXXXXXXXXXXXXXXXXXXXXXXXXXXXXXXXXXXXXXXXXXXXXXXXXXXXXXXXXXXXXXXXXXXXXXXXXXXXXXXXXXXXXXXXXYSFSLTTFSPSGKLVQIEYALAAVAAGAPSVGIKASNGVVIAAEKKYKSILSEEHSVHKVVMVTDHIGMVYSGMGPDFRLLVKKARKIAQEYFLVYQEPIPTAQLVQRVASIMQEYTQSGGVRPFGVSLLICGWRPYLFQCDPSGAYFAWKATAMGKNFINGKTFLEKRYTEELELEDAVHTAILTLKAGFEGQMTADNIEIGVCGFRCIPPVEVKDAGFDRHITIFSPEGRLYQVEYAFKAINQGGLTSIAVKGETAAVCVTRKKVPDKLIDPNTITHIFQITERIGCVMTGLIADSKSQVQRARYEAANWKYKYGYDIPIDMLCQRIADISQVYTQNAEMRPLGCSMMLIAYDDEGAQVYKADPAGYFCGYKAASVGVKQTEANSYLEKKLKKRECIQLAITALSTVLSADFKPSEIEVGLVTKDKPNFRTLTEAEMGVNDEMACVYAALILIDDDVAVTAEKINTILKAANVSVEPYWPGLFAKCLEG-DAKQMI-NISSAKVPKEILFECVNAVLASSKQRKFQETVELQIALKNYDPQKDKRFSGTVKLKHIPRPKFKICILGDQQHCDEAKANELPCMDVEALKKLNKNKKLVKKLAKKYDAFLASESLIKQIPRLLGPGLNKAGKFPSLLTHNDNMKVDEVKSTIKFQMKKVLCLAVAVGHVKMSPDELAQNVNLSINFLVSLLKKNWQNVRSLTIKSTMGPPQRLYMPPKFDPNEVKIVYMRAVGGEVGATSSLAPKIGPLGLSPKKVGDDIAKATADWKGLKITVKLTVQNRQAAISVVPSAASLVIKALKEPPRDRKKVKNVKHSGNITFDDVLDIARQMSRSMSRKLEGTVKQILGTCQSVGCTVEGMNPHDVIDQINAGEMEVPMGAYKYMQELWRKKQSDVMRFLFRVRCWQYRQLTSIHRAPRPTRPEKARRLGYKAKQGFVIYRIRIRRGGRKKPVPKGCTYGKPKNQGVNQLKPVRNLQSIAEERVGRKCGALRVVNSYWIGNDSTYKYYEIIMIDPFHKAIRHDPKIQWICKPVHKHRELRGLTSAGKKSRGLGKGHKFTKTIGGSRRACWKRRNTLSLRRRRMGRYSSEPENATKSCKARGSNLRVHFKNTRETAQAIKKMGLRRAQRYLKNVVAQKEIVPFRRFNGGVGRKAQAKQFKTQGRWPKKSAEFLLQLLRNAESNADYKGLDPDKLVIDHIQVNRAAKMRRRTYRAHGRINPYMSSPSHIEVILTEKDMKLELCAYSGYKIYPGHGKRAVKTDGKVLQFLNSKCERSHGMKKNPRKVCWTVLYRRKHKKGQEEETAKKRNRRTQKYQRAIVGATLNDILAKRNQKPEVRKAQREQAIRKKIRTSVIFHRPKTYQAARNPKYPRKSVPRKSRLDQYTVIKHPLTTESAMKKIEDNNTLVFIVDVKANKPQIKMAVKKLYDIDVQKVNTLIRPDGQKKAYVHLASDFDALDVANKIGIISHRKFSAPRHGSMGFTPKKRSKRHRGKVKAFPKDDKSKPIHLTAFLGYKAGMTHIVREVDKPGSKTNKKEVVEGVTIVETPPIVIVGVVGYIETPHGHRAFKTIWAEHVSEECRRRFYKNYKAKRKAFTKSARKWQDDLGKKDIEKDFKQMAKYCKVIRVIAHTQMKLMKKRQKKAHIMEIQVNGGTIAEKVAWAREHLEKQYPVNQVFAQDEMIDVIGVTKGKGFKGVTSRWHCKKLPRKTHKGLRKVACIGAWHPSRVQFTVARAGQKGYHHRTELNKKIYRIGQGKVVKNNAATEYDMTDKSITPMGGFPHY--------------------------------------------------------------KSAINEVVTREYTIHVHKRLHGIGFKKRAPRAINEIRKFAEKQMGTSDVRIDTRLNKHVWSKGVRNVPFRIRVRLSRRRNEDEDSVNKLYTLVTFVPVASFKGLQTENVDIVKKRLKKFTRHQSDRYVKVKTNWRKPRGIDNRVRRRFKGQRKMPNIGYGSNNKTKHMLPNGFRKVLVHNVKELEMLMMQNKRFCGEIAHGVSSRKRKDIVERAQQLAIRLTNANARLRSEENEKGYKLTKASYQKGKHTKFVKDLVREVSGFAPYEKRTMELLKVSKDKRALKFLKKRLGTHLRAKRKRDELGNVLAQMRKMTKGTSSFGKRHNKTHTLCRRCGRSSYHIQKHACAQCGYPQKKTRHYNWSVKGKRRKTTGTGRCRHLKTVWQKFKNGFRSGXXXXXXXXXXXXXXXXXXXXXXXXXXXXXXXXXXXXXXXXXXXXXXXXXXXDKSTWKANYFIKLVNYLEEYPKCFIVGVDNVGSKQMQQIRIALRGHAEILMGKNTLIRKAIRGHLENNPILEKILPHIRGNVGFVFTKEELTDVRKQILDNKVKAPARAGALAPVDVVVPPQNTGLGPEKTSFFQALSIPTKISKGTIEILNPVQLIKEGDRVGASEATLLNMLNISPFTYGLKIEQVYDSGTVFSPSILDISNDDLRNTFMSGVRNLASVCLSVGYPTIASVPHSIVNGFKNCLAVAVETDFKEAEMTKEYIKDPSKFVDPFSRKDWYDVKAPSMFNVRQVGKTLVNRTQGTRIASEGLKGRVFEVSLADLQNDEISFRKFKLIAEDIQGKNVLTNFHGMDLTTDKLRSMVKKWLTLIEANVDVKTTDGYLLRIFCIGFTKRQAKKTCYAQSKQIRNVRKKMIEIITRDVSSNDLKEVVNKLIPDSMGKDIEKACEGIFPLQDVYIRKVKVLKKPKFDLGKLMDLHGADNFEPPVQDTVMLMPKKDRVAIFEYLFKEGVMVAKKDYNAVKHIKNLYVIAAMKSLRSKGYVKEQFSWKHYYWYVTNEGIEYLRNFLHLPPEIVPATLKERAFQKQPTVFLNSKKDLRLVRSVGLGFKTPREATVGNYIDKKCPFTGNVSIRGRILTGVVQKMKMQRTIVIRRDYLHYIRKYNRFEKRHKNMSVHLSPCFRDVKVGDVVTVGECRPLSKTVRFNVLKVTKHHIRITLTSKNVKSLEKVCADLIKGAKSKELKVKGPVRMPTKVLRITTRKTPCGEGSKTWDRYQMRIHKRIIDLHSPSETVKQITKIGIEPGVEVEVTIADTIRTRKFMSNRLLFRKQMVVDVLHPGRASVPKTEIREKLARMYKTTSDVIFAFGFKTQFGGGRSTGFALIYDTMDYAKKFEPKYRLQRHGLYTRKQRKERKNRQKKVRGTKKVRDKLNNLVLFDKATYDKLYKEVPMYKLITPSVVSERLKVRGSLARKALEELHAKGLIKRVAKHHSQLIYTRITRGPKKHLKRLNAPKSWMLDKLTGVYAPRPSTGPHKLRESLPLIIFLRNRLKYALTGSEVTKIVMQRLIKVDGKVRTDKNYPAGFMDVITIDKTGENFRLLYDVKGRFTIHRITPEEAKYKLCRVKRVQTGPKGIPFLVTNDGRTIRYPDPLVKVNDTVQVDIATGKITDFIKFDSGNLCMITGGHNLGRVGIITNRERHPGSFDIVHIKDALGHIFATRLNNVFIIGKSNKPHVSLPKGKGVKLSIAEERDRRXXXXXXXXXXXXXXXXXXXXXXXXXXXXXXXXXXXXXXXXXXXXXXXXXXXXXXXXXXXXXXXXXXXXXXXXXXXXXXXXXXXXXXXXXXXXXXXXXXXXXXXXXXXXXXXXXXXXXXXXXXXXXXXXXXXXXXXXXXXXXXXXXXXXXXXXXXXXXXXXXXXXXXXXXXXXXXXXXXXXXXXXXXXXDDFEKSISQAILDLEMNSDLKAQLRELHITGAREKKAVIIFVPVPQLKSYQKIQVRLVRELEKKFSGKHVVLVAQRGILPKPTRKSKQKRPRSRTLTAVHDNILEDLVYPAEIVGKRIRIRLDGSRLIKVHLDKNNQTNIEHKTDTYSAVYKKLTDKEVTFEFMGISRDHWHKRRKTGGKRKPLRKKRKFELGRPAANTKLGSKRIHTVRTRGGNKKYRALRLDQGNFAWGSECCTRKTRIIDVVYNASNNELVRTKTLVKNAIVVIDATPFRQWYEAHYALPLGRKKGAKLKRSKKVDKKYKERQKTAKVEQALEEQFMTGRCLACIASRPGQCGRSDGYVLEGKELEFYLRKIKAKKXXXXXXXXXXXXXXXXXXXXXXXXXXXXXXXXXXXXXXXXXXXXXXXXXXXXXXXXXXXXXXXXXXXXXXXXXXXXXXXXXXXXXXXXXXXXXXXXXXXXXXXXXXXXXXXXXXXXXXXXXXXXXXXXXXXXXXXXXXXXXXXXXXXXXXXXXXXXXXXXXXXXXXXXXXXXXXXXXXXXXXXXXXXXXXXXXXXXXXXXXXXXXXXXXXXXXXXXXXXXXXXXXXXXXXXXXXXXXXXXXXXXXXXXXXXXXXXXXXXXXXXXXXXXXXXXXXXXXXXXXXXXXXXXXXXXXXXXXXXXXXXXXXXXXXXXXXXXXXXXXXXXXXXXXXXXXXXXXXXXXXXXXXXXXXXXX----RSWVFLPIVVVTFLVGIVRHYVSVLISSQKDSQVMIRSRMLRQNRIFIPKDAFYMRKHFLNNEETGYFKTQNPMTDPTMMTDMLKGNLTNVLPMIVIGGWINWTFSGFVTTKVPFPLTLRFKPMLRRGIELMSLDASWVSSASWYFLNVFGLRSIYTLVLGENNAADQTQMMQDQMSGAAMAMPPDPMTDRYNIHSQLEHLQSKYIGTGHADTTKFEWLVNQHRDSYSSYMGHFDVLNFFAIAENESKARVKFNLMEKMLQPCGPPTERPEDXXXXXXXXXXXXXXXXXXXXXXXXXXXXXXXXXXXXXXXXXXXXXXXXXXXXXXXXXXXXXXXXXXXXXXXXXXXXXXXXXXXXXXXXXXXXXXXXXXXXXXXXXXXXXXXXXXXXXXXXXXXXXXXXXXXXXXXXXXXXXXXXXXXXXXXXXXXXXXXXXXXXXXXXXXXXXXXXXXXXXXXXXXXXXXXXXXXXXXXXXXXXXXXXXXXXXXXXXXXXXXXXXXXXXXXXXXXXXXXXXXXXXXXXXXXXXXXXXXXXXXXXXXXXXXXXXXXXXMQNEAGEHVDLYIPRKCSASNRIIHAKDHASIQLNLATGGNATYAICGAIRRMGESDDCLNRLSKKDNLIAKNDPFADANTQEGFIHIRIQQRNGRKTLTTVQGLPESYDKKKIVKHCKKEFACNGTVVEHPEYGEVLQLQGDQRNNICGFLKRIGIAKQDQLVVHGFFEAKLLQGSILKKILEATKDLLGEAIWDCAATGISLQAMDTAHVSLVSLCLRSDCFEQYRCDRNISMGMNLTSMGKILKCAGNDDVTTMKAQDDEVTFMFESPKQGRVCTYQMKLMNIDSEHLGIPETDYKSIVKMPSAEFQRICRDLSQLGDSVTISCTKSGVSFSCSGDTGSGTINLVQSSDVDKEEDAVSIEMVDPVCLTFALKYLNSFTKATPLSPSVTLSMSPDVPLVVEYKI--------------XXXXXXXXXXXXXXXXXXXXXXXXXXXXXXXXXXXXXXXXXXXXXXXXXXXXXXXXXXXXXXXXXXXXXXXXXXXXXXXXXXXXXXXXXXXXXXXXXXXXXXXXXXXXXXXXXXXXXXXXXXXXXXXXXXXXXXXXXXXXXXXXXXXXXXXXXXXXXXXXXXXXXXXXXXXXXXXXXXXXXXXXXXXXXXXXXXXXXXXXXXXXXXXXXXXXXXXXXXXXXXXXXXXXXXXXXXXXXXXXXXXXXXXXXXXXXXXXXXXXXXXXXXXXXXXXXXXXXXXXXXXXXXXXXXXXXXXXXXXXXXXXXXXXXXXXXXXXXXXXXXXXXXXXXXXXXXXXXXXXXXXXXXXXXXXXXXXXXXXXXXXXXXXXXXXXXXXXXXXXXXXXXXXXXXXXXXXXXXXXXXXXXXXXXXXXXXXXXXXXXXXXXXXXXXXXXXXXXXXXXXXXXXXXXXXXXXXXXXXXXXXXXXXXXXXXXXXXXXXXXXXXXXXXXXXXXXXXXXXXXXXXXXXXXXXXXXXXXXXXXXXXXXXXXXXXXXXXXXXXXXXXXXXXXXXXXXXXXXXXXXXXXXXXXXXXXXXXXXXXXXXXXXXXXXXXXXXXXXXXXXXXXXXXXXXXXXXXXXXXXXXXXXXXXXXXXXXXXXXXXXXXXXXXXXXXXXXXXXXXXXXXXXXXXXXXXXXXXXXXXXXXXXXXXXXXXXXXXXXXXXXXXXXXXXXXXXXXXXXXXXXXXXXXXXXXXXXXXXXXXXXXXXXXXXXXXXXXXXXXXXXXXXXXXXXXXXXXXXXXXXXXXXXXXXXXXXXXXXXXXXXXXXXXXXXXXXXXXXXXXXXXXXXXXXXXXXXXXXXXXXXXXXXXXXXXXXXXXXXXXXXXXXXXXXXXXXXXXXXXXXXXXXXXXXXXXXXXXXXXXXXXXXXXXXXXXXXXXXXXXXXXXXXXXXXXXXXXXXXXXXXXXXXXXXXXXXXXXXXXXXXXXXXXXXXXXXXXXXXXXXXXXXXXXXXXXXXXXXXXXXXXXXXXXXXXXXXXXXXXXXXXXXXXXXXXXXXXXX
Halicryptus_spinulosus         RTSGQTIRTQNVMAAVAIANIVKSSLGPVGLDKMLVDDVGDVIITNDGATILKQLEVEHPAAKVICELAELQDLEVGDGTTSVVIIAAELLKNADELVKCKIHPTSIISGYRLACKEACRFIQDHLTINTDELGKDCIVNAAKTSMSSKLIGPDSDFFANMAVEAAMAIKDSKGAVKYPIKAINVLKAHGLSSRESVLVNGYALNCTVASQMMTRKVTGAKIACLDFSLMKTKMKLGVQIVVEDPASLDKIREREQDITKERVQKIINAGANVILLTGGVDDIYMKYFIQAGAMAIRRCKKQDMKRIAKATGAVMMPTLANLEGEESFDATMLGHAEEVAQEKVCDDELIIIKRTASSIILRGANDYMCDEMERSLHDALCVIKRVLESKSVVPGGGAVEAALSIYLENFATSLASREQLAIAEYANSLLVIPKTLAVNAAKDSTDLVAKLRAYHNAAQTHATLKWTGLDLYEGVVRDSVKDGVLEPAVSKVKSLKFATEAAITILRIDDMIKLKEKPTQIRHSNITAAKAVADAVRTSLGPKGMDKMIQSGTGDVTITNDGATILKQMQVLHPAARMLVELSKAQDVEAGDGTTTVVVIAGSLLDAASKLLAKGIHPTQISEAFQKAAVKGVEILMAMPVELSDRESLLKSAATSLNSKVVSQYSNLLSPLAVDAVMKNVDLTDIKIIKKLGGTIEDTQLIEGMVFTQKGPTKVENAQIALIQFCVSPPKTDMENQVILADYSQMDRVLREERAYILDIVKTIKKSGCNVLLIQKSILRDAVNDLALHFLAKMKIMVVKDIEREDVEFVCKSLGCKPIASLDHFSSQRMATADTVEEGAGKLVKVTGITTATVCVLIRGSNKLVLEEADRSIHDALCVIRCLVKKRALIAGGGAPEIELSLRLAEYAQTLTGTEAYCFRAYAEALEVIPITLAENAGLNPIATVTELRNKHAQGEPNTGINVRRGAVTNILEESVVQPLLVSTSALQLATETVRSILKIDDI---------------------------------------------------MMVSSDGDITITNDGATILDQMDIDHEIAKLMVQLSKSQDDEIGDGTTGVVVLAGALLEHAEQLLDRGIHPIRVADGYELAAKVAVERLDAIADSYPVDLNNEPLIQTAMTTLSSKIVNRCGRQMAEIAVDAILAVADLERKDVDFELIKVEGKDGGKLEDTMLVKGVIVDKDFSHPQMPKVVRDAKIAILTCPFEPPKPKTKHKLDITSVEDYNKLREYEKEKFEEMVKQVKDTGANLAICQWGFDDEANHLLLAHNLPAVRWVGGPEIELIAIATGGRIVPRFSELTAEKLGRAGIVKELSFGTTKDKMLVIEECHNSRAVTIFIRGGNKMIIEEAKRSMHDALCVIRNLVRDNRIVYGGGAAEIACSITVSQAADKISTLEQYAVRAFADALEATPLALAENSGLAPMKTMTAIKARQINEKNPWLGVDCLAKGTNDMKAQHVIETLIGKKQQIILATQLVKMILKIDDIRAKDLKFGAEARAIMLQGVDLLADAVALTMGPKGRNVIIEQSWGSPKITKDGVTVAKAIELKDKYQNIGAKLVQDVANNTNEEAGDGTTAATVLARSIAKDGFEKISKGANPIEIRKGVMMAVDAVVKALKAMSSPVTTPEEVAQVATISANGDGELISEAMKKVGRNGVITVKDGKKLSDELDVIEGMKFDRGYISPYFLNSTKGAKCEFQDSLVLLSEKKISTIQSIVPALELANRKPLLIIAEDIDGEALTTLVLNRLKVGLQVCAVKAPGFGDNRKNTLHDIAVATGGLVFGDDANLIKIEDVQLHDLGVVEEVSVTKDDTLMLRGKGEKENVDRRVQQIKDEMELTTSDYEKEKLNERLAKLSAGVAVIKVGGSSEVEVNEKKDRYNDALNATKAAVEEGIVPGGGVALLRCLPSLDAVTTANHDQKIGVEIVRKALRMPCMTIASNAGVDAALIVQKVGYDAMKCEYVDMLKSGIIDPTKVVRTALVDAAGVASLLSTAECVITEIPKYNFKKITVVPTSKECVDVILSKTQRKTPTVIHKNYKIARIRQFYMRKVRFTQQNFHDKLTEILTGFPKLEDIHPFYADLMNVLYDRDHYKLALGQLNTARHLIDNVAKDYVRLLKYGDSLYRCKQLKRAAMGRMCTIMKRQKQSLEYLEQVRQHLSRLPSIDPNTRTLLICGFPNVGKSSFINKITRADVEVQPYAFTTKSLFVGHTDYKYLRWQVIDTPGILDHSLEDRNTIEMQAITALAHIRAAILYIMDVSEQCGKTIEEQVELFNNIKPLFTNKPIIVVANKVDVTKLEDLTEEGIINVKTEACDRLLSLRVEMKMRGKKRLHIAVPQQRDKERPPFIPKLERDIELEMDDEYILDLKKNWEKYDVLPEIWEGRNVSDFIDPKEHTNVVFIGHVDAGKSTIGGHIMYLTGMVDKRTLEKYEREAKEKNRETWYLSWALDTNQEERDKGKTVEVGRAYFETANRHFTILDAPGHRSFVPNMIGGASQADLAVLVISARKGEFETGFERGGQTREHAMLAKAAGVKHLIVLINKMDDPTVRWDVARYEECKEKLVPYLKKLGFNPKTDLCFMPCSGLTGAFLCPWYRGPCFIPYIDLPSFYRKAEGPVRMPIVDRYRDMGTVVLGKLESGRVIKGNTYMLMPNRTNVEVMFIMSDEIDANEAEAGENIKVKLKGVEEEDVSQGFVLCDMLSPCSTGSIFDAQVVILEHKSIICAGYGCVLHVHTCIEEVTIQALLCLVDRKTGEKSKTRPRFIKQDQIAIVRFQICIESFKDFQAMGRFTLRDEEIRALMDKKTNIRNMSVIAHVDHGKSTLTDSLVSKAGIIASAKAGETRFTDTRKDEQERCITIKSTAITMYFEIDEKDLQFMGFLINLIDSPGHVDFSSEVTAALRVTDGALVVVDCVSGVCVQTQTVLRQAIAERIRPVVFMNKMDRALLELQLEQEDLYQTFTRIVENINVIVATYSDGPMGNIQVDPPKGNVGFGSGLHGWAFTLKQFAELYSEKFKVKLMRRLWGDNFYNATSRKWRAFCLFVLDPIYKFEAVMGKKDEIAKLVEKLLKGPEKDLEGKPFLKFVMRTWLPAGETLLQMIAIHLPSPVTAQRYRMELLYEGPHDDEAAKECNSKAPLMMYVSKMVPTNDKGRFYAFGRVFSGTCGTGQKVRIMGPNYVPGKKDDLYEKPIQRTILMMGRYTEAIEDVPCGNICGLVGVDQFLVKTGTISTYAQAHNLKVMKFSVSPVVRVAVEVKNPADLPKLVEGLKRLSKSDPMVQCIIEESGEHIVAGAGELHLEICLKDLEEDHACVPLKKSNPVVSYRETVSEMSSIMCLSKSPNKHNRLFMRSEPMPEGLSEDIDSGVTQKQEFKSRARYLGEKYEYDVTEARKIWSFGPEGTGPNLLIDCTKGVQYLNEIKDSIVAGFQWASKEGVLCEENLRGVRFNIYDVTLHADAIHRGGGQIIPTARRVMYASMLTAAPRMMEPVYLVEIQCPESAVGGIYGVLNRRRGHVIEESQVPGTPMFVVKAFLPVMESFGFTADLRSNTGGQAFPQCVFDHWQILPGDPRPREVVNETRKRKGLKEGLPSLDNYLDKLDAGASRTYPMQCSALRKNGFVVLKGRPCKIVEMSTSKTGKHGHAKVHMVGIDLFTNKKLEDICPSTHNMDVPNVSRRDYQLVNIDEDGYMALLDSGDTREDLKLTEDTVLKAMDNECAIATRTYDLNITYDNYYRTPRLWLKGYDENRRPLTVDEMYEDFSQDHAKKTVTIESHPHLP-EYMASVHPCRHAVVMKKIIQTVEGGGRELHVHLYLLIFLKFVQAVIPTIEYDYMGRRPARCYRYCKNKPYPKSRFCRGVPDAKIRIFDLGRKRADVNDFPLCVHLVSDEIEQLSSEALEAGRICANKYMVKYCGKDSFHIRIRVHPFHVIRINKMLSCAGADRLQTGMRGAYGKPLGTVARVSIGQPIVSIRVKEQHKAQAIEALRRTKFKFPGRQKIFVSKKWGFTKWNQEEYKEMRDEGRVASDGVHAKYYREHGPLFDSMGLREDLLRGVYAYGFEKPSAVQQRAIIPVTKGRDIIAQAQSGTGKTATFSIGILQSLDLQTRETQALILSPTRELAVQIQKVILALGDYMNVQCHACIGGTSIGEDIRKLDHVVSGTPGRVFDMIRRRNLRTRSIRMLILDEADEMLNKGFKEQIYDVYRYLQVVLISATLPHEVLEMTCKFMTDPIRILVKRDELTLEGIKQFFVAVEREEWKFDTLCDLYDTLTITQAVIFCNTKRKVDWLTEKMREANFTVSSMHGDMPQKERDAIMKEFRSGSSRVLISTDVWARGIDVQQVSLVINYDLPNNRELYIHRIGRSGRFGRKGVAINFVKNDDIRILRDIEQYYATQIDEMPMNVADLIFENNNEVGVFAKLTNTYCLVAIGGSENFYSVFEGELSDIIPVVHTSIAGCRIIGRLCVGNRHGLLVPSSTTDQELQQMRNSLPDSVKIQRVEEKLSALGNVIACNDYVALVHPDLDRETEELLADVLKVEVFRQTLADNVLVGSYCALSNQGGLVHPKTSVEDQDELSSLIQVPLVAGTVNRGSDVIGAGMVVNDWCAFCGIDTTSTELSVVESVFKLSVAPSIFGSLDIKKAISCLLFGGSRKRLPDGLTRRGDINLLLLGDPGTAKSQLLKFVERVSPIGVYTSGKGSSAAGLTASVIRDPSTRNFIMEGGAMVLADGGVVCIDEFDKMREDDRVAIHEAMEQQTISIAKAGITTTLNSRCSVLAAANSVFGRWDDTKGEENIDFMPTILSRFDMIFIVKDEHIGPRLSEAAAEKLKNRYVLMRSGTGEQERETGKRTTIPITVRQLEAVIRISESLAKMQLQPFATERHVDEALRLFQVSTLDAAMSGSLAGAEGFTSQEDQEMLNRVEKQLKRRFAIGSQVSEHSIVQDFTRQKYPEPAIYKVLHFMLRRGEIQHRMQRKMLYR-----------------------------------------------------------------------------------------------------------KFPHLFTGKRQPWRGILLFGPPGTGKSYLAKAVATEA-NSTFFSVSSSDLVSKWLGESEKLVKNLFEMARDKKPSIVFIDEIDSLCSSRSDNESESARRIKTEFLVQMQGVGTDNFGVLVLGATNIPWVLDAAIRRRFEKRIYIPLPEENARTTIFKIHMGTPNSLLGEKSEGYSGADISIVVRDALMQPVRKVQTATHFRRVRGPSRTDPNVIVDDLLSPCSPGAPGAVEMSWMEVPGEKLLEPVVTMGDVLLSLSSTKPTVNDEDLLKVDKFKDDFGQEGRKVAIPSHRYTPLKENWMKIYSPIVEHLNLQIRCNLKTRNVEIRTCKDTDIGALQKAADFVKAFTLGFEVEDALALVRLDDLFLESFDVTDVKPLKGDHLSRAIGRVAGKGGKTRFTIENVTKTRIVVANSRIHILGSFLNIKIARAICNLILGSPPSKVYGIFTPTNQIRLTNVAVVRMKKAGKRFEIACYKNKVIEWRNKVETDIDEVLQTHTVFTNVSKGQVAKKDDLEHAFSGDQTEICKQILTKGELQVSEKERSTQLESTFRDIATTVADKTVNPETKRPYTVGVIEKAMKDMHFSVKPNRNPKQQALEVVKKLKMFLTRSEYDRGVNTFSPEGRLFQIEYAIEAIKLGSTAIGMQTSEGIVLAVEKRITSSLMEPSSIEKIVEIDRHIGCAMSGLIADSKTMIDHARVEAQNHWFTYNERMDVESVTQAVSNLAIQFGDDDTETMSRPFGVALLFAEKGPQLFHMDPSGTYVQYAAKAIGSASEGAQQSLQEVYHKSMTLKEAVKHAMTILKQVMEEKLNSTNVEYDRAITVFSPDGHLFQVEYAQEAVKKGSTAVGVRGKDIVVLAVEKKSVAKLQEERTVRKICSLDEHVVMAFAGLTADARIIINRARIECQSHRLTVEDPVTLEYITRYIATIKQRYTQSNGRRPFGISALIAGFDYDGPHLYQTDPSGTYHEWKANATGRSAKTVREYLEKNYSAEVAASDQDVIKLAIKALLEVVQSGGKNVELATMRYDSRTTIFSPEGRLYQVEYAMEAIGHAGSCLGILADDGVILAAERRNVHKLLDEGFFSDKIYKLHDNMACSVAGITSDANVLTNELRLIAQRYNLQYQEPIPCEQLVS----------------------------------------------------------------------------------------------------------YSFSLTTFSPSGKLVQIEYALAAVAAGAPSVGIKATNGVVIATEKKQKSVLYDEHSIHKVEPITKHIGMVYSGMGPDNRVLMRRARKLAQQYYLTYQEEIPTPQLVQRIANVMQEYTQSGGVRPFGVSLLIAGWRPYLFQCDPSGAYFAWKATALGKNFVNGKTFLEKRYSEDIELEDAVHTAILTLKESFEGQMTEDNIEVGISGFRRLTPAEVKDAGFDRHITIFSPEGRLYQVEYAFKAINQGALTSVALRGSNTAVVVTQKKVPDKLHDASTITHMFKITEHIGCVMTGMMADSKSQVQRARYEAANWKYKYGYEIPMDQLCKRIADISQVSTQNAEMRPLGCCMILIAIDEEGPQVFKTDPAGYYCGYKATAAGVKQTEAHSFLEKKLKKRETIRTAITCLSTILSADFKASELEIGIVDKDHPEFKILSNDDMASKDELACVYAALILADDNVDVTSDKLTSIVKAAKVDVEGLWPNLFAKALEGVSLKDLIANMSS----------------------------------------KDKRFSGTIKLKYIPKPKYRVCVLGDQQHCDEAQANNVECMDADALKKLNKSKKLVKKLAKKYDAFLASDSLIKQIPRILGPGLNKAGKFPTLLTHTESIKVDDVKATIKFQMKKVLCLAIAVGHVGMNEDELVANISLAINFLVSLLKKNWQNIRSLYIKSTMGPPQRMYMPPKFDPNEIKIVYLRAVGGEVGATSTLAPKIGPLGLSPKKVGDDIAKATQDWKGLKITCKLTIQNRQATISVVPSAAAMVIKALKEPPRDRKKVKNILHNGNITMDDIMNTAKIMRRSLSRFLSGTVKEILGTAQSVGCTVDGMAPHDVIEKINSGDIEIPMGAYKYIQEMYRKKQSDVMRFLLRVRCWQYRQLSNLHRASRPTRPDKARRLGYKAKQGYVIYRVRIRRGGRKKPVAKGATYGKPTHQGVNQMKLQRSLQSVAEERAGRRCGALRVVNSYWIGQDSTYKIFEVIMVDPFNKVIRRNPEMQWICTPVMKHREMRGLTSAGKKSRGLGKGHGYHSTIGGSRRACWKRRNTTQMRRYRMTRYSVDPHNPAKSCKARGSHLRVHFKNTRETAMAIKRMNLQRAQRYLRAVIEKKEIVPFRRFNGGVGRKAQAKQFGTQGRWPQKSAEFLLQLLKNAESNAEQKGLDVDHLFVEHVQVNRAPQMRRRTYRAHGRINPYMSSPCHIEVILAEKEMKIELCSFSGYKIYPGHGKRMVKSDGRVFQFVSAKTESLSAHKYNPRKVCWTVLYRRRHKKGLQEEASKKRSRKATKFQRAITGATLTDILAKRNQKPEVRKAQRDQAIRRKIRTSVKFHRPRTLRLLRAPKYPRKSAPGRNRLDQYSIIKYPLTTESAMKKIEDNNTLVFLVHLRSNKPEIKYAVKKLYDIDVAKVNTLIRPDGQKKAYVRLAPDYDALDVANKIGII----------------------------------------------GYKAGMTHIVREVEKPGSKLNKKEVVEAVTIIETPPLVIVGVIGYIETPRGLRTLKTVFAEHLSEDCRRRFYKNYKAKRKAFTKYAKKWQDEVGKKQIDREFEKMKKYCTVIRVVAHTQMKLLRKRQKKAHIMEIQLNGGTIAEKVQWACDHLEKAVPISSVFAADEMIDMVGVTKGHGFKGVTSRWHCKKLPRKTHKGLRKVACIGAWHPSRVQFTVARAGQKGYHHRTEINKKVYRIAEGKVIKNNAATDFDLSDKSITPMGGFPHYGEVRNDFIMIKGCCMGPKKRIITLRKSLLTHTKRVAAEHITLKFIDTASKFGHGRFQTHQEKKSAINEVITREYTIHLHKRLHGVGFKRRAPRAIKEIRKFAEKQMGTSDIRVDTRLNKFIWSKGVRNVPFRVRVRLARKRNEDDDSIHKLYTLVTYVAATTFKGLQTVNVDIKKKRVKRFIRHQSDRYVKVKKNWRKPKGIDNRVRRRFKGQYLMPSIGYGSAKKTKHMLPDGFRKFLVHNIKELEVLMMQNRRFCAEISHSVSARKRKAIVERAAQLAIKVTNPNARLRSEENEKGHKTTRPARRNGKHTKFIRDIVREVAGFAPYERKAMELLKVSKDKRALKFLKKRVGTHLRGKRKREEMSSVIIQMRKMTKGTSSFGKRHNKTHTLCRRCGRSSYHIQKSTCSQCGYPAKRIRKYNWSEKAKRRKTTGTGRIRHLKTVYKRFRHGFREGXXXXXXXXXXXXXXXXXXXXXXXXXXXXXXXXXXXXXXXXXXXXXXXXXXXDRTAWKANYFLKIIQLLDEYPKCFIVGADNVGSKQMQNIRISLRGTGVVLMGKNTMMRKAIRGHMENNPHLEKLLPHIKGNVGFVFTKEDLVEVRDKILTNKVAAPAKAGVLAPIDVKVPPQGTVLGPEKTSFFQALAIPTKITRGTIEILSDVHLIKKDSKVGASEATLLTMLGIMPFHYGLHIKQVYDSGTVFEPEILDITPEDLRVRFLSGVLNVASVSLQIGYPTLASVPHSIANGFKNLLAVAVATDFAEATMIKELLSDPSKL-------------------------------------------------------------------------------------TDKLRSMVKKWQTLIEAYVNVTTTDGYQLRVFCLGFTKRQMKKTCYAQSTQVVNIRRKMVDIITREVGSSDLKEVVNKLIPDSIGKDIEKACQGIYPLHDVYIRKVKVLKKPRFDLGKLMELHGTDGFEPPIQESVMLMPKKNRVAIYEYLFKEGVMVAKKDFNAPKHIPNLHVIKALTSLKSRGYVKEQFAWRHYYWYLTNEGIQYLRDFLHLPPEIVPATLKERSFQKQPTVFLNRKKGLRYYKNVGLGFKTPREAIDGTYIDKKCPFTGNVFIRGRILTGIVLKMKMQRTIVIRRDYLHYVRKYNRFEKRHRNMSVHLSPAFRDVQVGDVVTVGECRPLSKTVRYNVLKVTKSRIRITLMSRNVTTLEKVCADLIKGAKEKQLRVKGPVRMPTKILRITTRKTPCGEGSKTWDRYQMRIHKRVIDLHSPSEIVKQITSINIEPGVEVEVTIADTIRTRKFMTNRLLARKQMVVDVVHPGRATVPKTEIRDKVAQMYKTTPDVVFAFGFRTQFGGGRTTGFSLIYDSLDAAKKFEPKYRLARHGLYERKQRKERKNRMKKVRGVKKVRDKLNNLVFFDKATYEKLYKEVPSYKLVTPSIVSERLKVRGSLARAGLIELHSKGLIKLVSKHASQVIYTRATRGPKKHLKRLNAPRHWMLDKMTGCFAPKPSCGPHKLRECLPLVIFLRNRLKYALTGDEVKKIVMQRLIKVDGKVRTDATYPTGFMDVVTIEKTDERFRLIYDVKGRFTVHRITAQEAAYKLCKVKKLEVGPKGVPFIVTHDGRTIRYPDPNVKVHDTVKVDIASGKIQDYIKFDTGNLCMITGGRNLGRVGTVTHRDRHLGSFDICHIKDSAGNSFATRLSNVFIIGK-------------------------MKLNVSFPATGAQKLLEVDDERKLRVFYEKRMAQEVAADSLGNEWKGYVVRISGGNDKQGFPMKQGVLTTGRVKLLLSKGHSCYRVRRSGERRRKSVRGCIVDGNLSVLNLVVVKKGEQEIPGLTDRNIPRRLGPKRASKIRKLFNLTNQDDVRAYVVRRPLAEKEGKRTKAPKIQRLVTPIVLQRKRDEVEQQISQALLELEMNSDLKAQLRELHITGARERKAVIIFVPVPQLKAYQKIQTRLVRELEKKFSGKHVVFIAQRRILAKPTRKNKQKRPRSRTLTSVHDAILDDLVYPAEIVGKRIRVRLDGSRMIKVHLDKAQQTNIEHKTDTFSSVYKKLTGKEVNFEFMGISRDNQHKRRATGGKRKPLRKKRKFELGRPPANTKLGPQRIHTVRTRGGNKKYRALRLDHGNFAWGSECCARKTRIIDVVYNASNNELVRTKTLVKNAVVTIDATPFRTWYETHYALPLGRKKASKLKRSKKLMKKYELRKKHAKVEPVLEDEFMTGRVLACIASRPGQCGRCDGYILEGKELDFYLRKIKSKKLCAKAREILAEESNVQRVDSPVTVCGDIHGQFYDLKELFKVGGDVPDTNYLFLGDFVDRGFYSVETFLLLLALKVRYPDRITLIRGNHESRQITQVYGFYDECLRKYGSITVWRYCT-----------------------------------------------------------------------------------------------------------------------------XXXXXXXXXXXXXXXXXXXXXXXXXXXXXXXXXXXXXXXXXXXXXXXXXXXXXXXXXXXXXXXXXXXXXXXXXXXXXXXXXXXXXXXXXXXXXXXXXXXXXXXXXXXXXXX---SQSWICRRIV---------RHHATILFSSAKDSQAMIRSRLLRENGKYLPKESFLMRKNFFNNEETGFFKTQNPMTDPTMMTDMLKGNLTNVLPMIVIGGWINWTFSGFVTTKVPFPLTLRFKPMLQRGVELASLDASWVSSASWYFLNIFGLRSMYTLILGQDNQADQTKQMQDQMSGAAMAMPQDPXXXXXXXXXXXXXXXXXXXXXXXXXXXXXXXXXXXXXXXXXXXXXXXXXXXXXXXXXXXXXXXXXXXXXXXXXXXXXXXXXXXXXLVLVLGDLHVPHRCNSMPAKFKKLLVPGKIQHILCTGNLCTKESFDYLKTLASDVHVVRGDFDENYPELKVVTVGQFRIGLCHGHQVVPWGDTDSLALIQRQLDVDILISGQTHKFEAFEHEGKFYINPGSATGAYNALPSFVLMDIQASTVVTYVYQLIGDEVKVERIEYKKPAGDAAKGQKLFKQRCDQCHTVNKDGKHKTGPNLHGLIGRKTGQAPNFAYTDANKSKGITWEKETLFTYLANPKKYIPGTKMVFAGLKKKNERADLIAYLYEATXXXXXXXXXXXXXXXXXXXXXXXXXXXXXXXXXXXXXXXXXXXXXXXXXXXXXXXXXXXXXXXXXXXXXXXXXDPFADAVKQEGLIHIRIQQRNGRKTLTTVQGISDNYDKKKLVRAFKKEFACNGTVVEHPEYGEVIQLQGDQRNNICQFLTKIGIAKTEQLKVHGFFEARLVQGSLLKKILEATKDLLTEATFDCSSTGMSLQAMDSSHVSLVSLMLRSDGFDAYRCDRNLSMGINLTSMTKIIKCSSNDDVVTIKADDDTVTFMFESPNQEKVSDFEMKLMDLDTEHLGIPETDYSVVVKMPAQEFQRVCRDMSQIGESVTICCTKDGIRFSASGDLGTGNIKIAQSANVDKEEEAVVIEMQEAVTLTFALRYLNFFTRATSLSGQVSLSMSPEVPLVVEYKIADMGYMRYYLAPKI---------------------------------------------------------------TGKPLSVELGPGIMGSIFDGIQRPLREINIITNSIYIPKGVTTTALNRSDKWDFKVGSHITGGDIYGLVHENTLIRHKVMLPPRSKGTVTYLASPGSYDINDVILETEFDGEKSKYTMLQMWPVRQPRPVTEKLAANYPLLTGQRVLDSLFPCVQGGTTAIPGAFGCGKTVISQALSKYSNSDVIVYVGCGERGNEMSEVLRDFPELTCEVGGRVESIMKRTCLVANTSNMPVAAREASIYTGITLAEYFRDMGYNVSMMADSTSRWAEALREISGRLAEMPADSGYPAYLGARLASFYERAGRVKALGNPAREGSVSIVGAVSPPGGDFSDPVTSATLGIVQVFWGLDKKLAQRKHFPSINWLISYSKYMRVLDEFYDKNFPEFINLRNKCREILQEEEDLSEIVQLVGKASLAEADKITLEVAKLLKDDFLQQNSYSGYDRFCPFYKTVGMLQNMILFYDQARHAVETTAQSNKVTWAMIREAMGEILYQISSMKFKDPVKDGEAKIKSDFAELAENMQTAFRNLEDFPSRMAQTTMKSRLAGAQKGHSLLKKKADALTLRFRAILKKIIETKVLMGEVMKEAAFSAAQAKFVIGDFNHVVLQNVTKAQTKVRSKKDNVAGVTLPVFEHYGDGDSYELAGLARGGQQVSKIKKNYAKAVELLVELASLQTSFITLDEVIKITNRRVNAIEYVIIPRIERTLQYIITELDEREREEFFRLKKVQGKMPQNEHIELHRKRYGRRLDYEERKRKKESREVHKRAAKAKKLRGLKAKLYNKQRHAEKVQMKKTIKMHEERKTKAVPAYLLDREQSRAKVLSNMIKQKRKEKAGKWDVPLPKVRAMGDSEVFRVVKTGKSRRKGWKRMVTKVTYVGEGFTRKPPKFERFIRPMALRFRKAHVTHPELKATFCLPLIGVKKNPTSPLYTSLGVITKGTVIEVNISELGLVTQGGKVIWGKYAQVTNNPENDGCINAVLL
Pristionchus_pacificus         RTTGQSIRSQNVTAAVAIANIVKTSLGPVGLDKMLVDDVGDVIITNDGATILKMLEVEHPAGKVLVELAQRQDEEVGDGTTSVVIVAAELLKLADELVKNKIHPTTVINGYRLACKEAVKYLNENLSFPVEELGRQSLINAAKTSMSSKIIGP----------------------------AINVLKAHGKSARESMLIKGYALNCTVACQ-MPLQI-DAKIACLDFSLQKAKMHLGISVVVDDPVKLEAIRREEFDIVKRRIEKILAAGANVILTSGGIDDLCLKMFTEAGAMGVRRCKKADLKRIAKATGATLCCSLANLEGEETFEAS-LGHADEV---------------------------------------------------------------------------SSREQLAVAEFAQALLVIPKTLSANAARDSTDLVAKLRAFHHKAQSNLALKWAGLDLENGEVRDNKEAGIFEPAMSKVR---------------------KEKSGSVR-SNIVAAKAVADAVRTSLGPRGMDKMIQSGNGDVTITNDGATILNQMSVIHPTAKMLVELSKAQDIEAGDGTTTVVVIAGALLDAAQKLLVKGIHPTAISESFQRAAAQAIILQ-MAPIDLANDELLVKLATTSLNSKVVSQHSW-LAPMAVNAVKK------IKIIKKMGDTVEESEMIEG-----------EKAKIALIQFQLSAPKTDMENQVIISDYAQMDRALKEERHYLLDLCKQIKKSGCNVLLIQKSILRDAVSELSLHFLAKMKIMVVKDIERDDIEFYSNILGCRPIASADHL-AESLGSADLVEE-GGKVIKVTDIQSSAVSILLRGSNKLVLEEADRSLHDALCVIRCLVKKRFLLPGGGAPEMEVACKLAER----GGAEQYC-RAFADALELVPYTLAENAGLSPIHTVTELRSQHAG-----GVNVRKGFVTDMKEENV-QPLLVSHNAIKQASECVRSILKIDDIFDEYGQPFIVMREQD-QKRLTG-EAIKSHIAA--RVANTMRTSLGPRGLDKMLVSPDGDVTITNDGATIMEKMDVQHHIAKLMVELSKSQDQEIGDGTTGVVVLAGALLEEAEHLLDRGIHPTKIADGYDLAC--------------------DRLIETAQTSLGSKIVNRCIRQFAEIAVDSVLSVADLKT-DVNFELIKMEGKIGGRLEDTMLVKGIIIDKTMSHPQMPKEL-NVKVAILTCPFEPPKPKTKHKLD------------------------VKECGATLALCQWGFDDEANHLLHHHNLPAVRWVGGPEIELIAIATNGRIVPRFAELTTEKLGSAGLVREITFGTSNDRMLVIEECPNNRAVTVFIRGGNKMMIDEAKRSLHDAMCVVRNLVRDSRIVYGGGAAEMACAVEV-KQADKIEGIEQYAFRAFVDALESIPMALAENSGLPPIT--VALK----------------------------IETLVSKKEQL-LATQV-----------AKDIKFGAE-RTAMLVGVD-LADAVAVTMGPKGRNVIIEQSWGSPKITKDGVTVAKSIDLPDKYQNLGAKLIQDVANKANEEAGDGTTCATVLARAITKEGFENISRGANSVEIRRGVM-AVEVIVL---KLSKPVTTPEEIAQVATISANGDGGLISEAMKKVGNKGVITVKDGKTLNDELELIEGMKFDRGYISPYFINTAKGAKVEYEKALILLSEKKISNVNDIVPALELANRKPLVIIAEDVDGEALTTLVLNRLKVGLQIAAVKAPGFGDNRKNTLKDMAIATGATIFGDDANL-KMEDIQIGDFGEVEEVSITKDDTLLLRGKGDPKE---KRIQIADEIE-STSEYEKEKFNERLAKLSRGVAVLKIGGASEVEVGEKKDRVTDALNATRAAVEEGIVPGGGVALLRA------LKLENEDQQKGV-IVKKAIRQPISTIVRNAGIEAAPVVEKVGYDAMNDVYVNMYEAGIIDPTKVNKTSLQDAAGVASLLATTEAVVVEIPK-------------ELKEVCLSKTQRKTPTVVHRQYSIGRIRAFYARKIKFLQQTLHDKLT--IIEFPKMEEVHPFYADLMNILYDRDHYKIALGQMN-ARHLIDGIAREYCRLMKYADSLYRCKMLKRAALGRMVKLLRRQSS--FYLEQVRQHLSRLPSIDPNNRTL-LCGFPNVGKSSFINTVTRADVEVQPYAFTTKALYVGHLDYKFLRWQVIDTPGILDQPLEERNTIEMQAVTALAHLKAAILYVMD-SEQCDKTLAEQ---LESIRPLFANKPVLVALNKVDP------TKTGVVIRR----------------------------------------------------YVLDLKKNY-KYDIIPEIWNGHNIADFVDEKEHVNIVFIGHVDAGKSTIGGQLM-LTGMVDKRTLEKYEKEAKEKGRETWYLSWALDTNEEEREKGKTVECGRAYFE---------------------------------VISARKGEFETGFDRGGQTREHAMLVKTAGVKHL--LVNKMDDPSVAWDVERYNEIQERLTPYLKKCGFNPKTDI-YIPCSGLTG---GSWYT-----------------------------------------------------------------------------------------------------------------------------------------------------------------------------------------------------EIR-LMDRKKNIRNMSVIAHVDHGKSTLTDSLVSKAGIIAGAKAGETRFTDTRKDEQERCITIKSTAITMFFELEMKDIDFIGFLINLIDSPGHVDFSSEVTAALRVTDGALVVVDCVSGVCVQTETVLRQAIAERIKPILFMNKMDRALLELQLGQEELFQTFQRIIENINVIIATYGDGPMGVISVDPSIGNVGFGSGLHGWAFTLKQFAEIYADKFGVKLMKNLWGDRFFDLKTKKWRGF--FVLDPIFKFDAIMNKKEE-SALINRLILSEEKEWEGKQLMKVFMRKWLPAGDTLLQMICIHLPSPVTAQKYRMEMLYEGPHDDEAAKNCDANGPLMMYISKMVPTSDKGRFYAFGRVFSGKVATGMKARIQGPNYVPGKKDDLYEKTIQRTILMMGRYTEPIEDIPSGNIAGLVGVDQYLVKGGTITTYKDAHNMRVMKFSVSPVVRVAVEPKNPGDLPKLVEGLKRLAKSDPMVQCIFEESGEHIIAGAGELHLEICLKDLEEDHACIPLKKSDPVVSYRETVSAESSE-CLSKSPNKHNRLHLTAVPMPDGLADDIEAGVDPKSDFKERAKILAEKYEYDVTEARKIWCFGPDGTGPNILVDVTKGVQYLNEIKDSVVAGFQWATKEGVLCDENMRGIRFNVHDVTLHADAIHRGGGQIIPTARRVVYAS-LTAQPRLLEPVYLVEIQCPEQAVGGIYGVLNRRRGHVFEESQVTGTPMFVVKAYLPVNESFGFTADLRSNTGGQAFPQCVFDHWQILPGDP-------DIRKRKGLKESIPDLQNYLDKLDSGASNTFPKQCSALRKNEHVMIKGRPCKIVDMSTSKTGKHGHAKVHLVALDIFTGKKLEDICPSTHNMDVPVVKRKE-MLMDID-DGFCSLMD----KDDIRLPEGTVVAACGEEAILGPRTYDLHITYDKYYQVPRLWLTGYNERRQPLSVDEM---------------ETHPHLDVPPIASVHPCRHAETMKRLMDQLAENGKELSVEQYLLIFLKFVQAIIPTIEYDYMGRRPARCYRYIKNKPYPKSRFCRGVPDAKIRIFDLGRKKAFVDEFPACVHMISNEREMLSSEALEAARICANKFLVKNCGKDAFHMRVRKHPYHVTRINKMLSCAGADRLQTGMRGAYGKPNGLVARVDIGDFLFSVR-REQH--EAIEAFRRAKFKFPGRQFVVVSKKWGFSKWNK-AYE---MRGRLVPDGK----LKEHGPLFDDMKLKETLLRGIYAFGFKKPSAIQQRAIVPCTTGKDVIAQAQSGTGKTATFSVSILQKIEETSAHLQALVMAPTRELAQQIQKVMCALGDFMNIKVHACIGGTSIRDDLRKLEHVIVGTPGRVNDMI-RGVLRTDGIKMFVLDEADEMLSR-------------------------------------IRILVKKEELTLEGIRQFYI-VDKDEWKFGTLCDLYEAVNVTQAVIFCNTRRRVEQLTDQMTKKQHTVSCLHGDMEQGERDQIMREFRSGSSRVLITTDLLARGIDVQQVSLVINYDLPSNRENYIHRIGRSGRFGRKGVAINFVTD---KRLQDIE-FYTTIIEEMPMNIADLLYEGSNDVGVFCNLTNSYCLVGVGATQNFYSLVEAELAD-IPVVH-SVAATRIVGR-SVGNRKGLLVPNATTDQELQHIRNALPDEVKIRRVDERLSALGNVIVANDHVALVHADISKETEEAV-DTLGVEAFR--VSGNALVGSYCSLSSQGCLVAAKTPV--QRELAALLQVPVVAGTLNRGSELVGAGMVVNDWLAFVGLDTTSTELSVIESIFKLSIAPSIYGS-DIKKSIACLLFGGSRKRLPDGITRRGDINVLLLGDPGTAKSQLLKFVEQVSPIGVYTSGKGSSAAGLTASVKDP--------------------------SKMREDDRVAIHEAMEQQTISIAKAGITTTLNSRCSVLAAANSVYGRWDDSKGNDNLDFMPTILSRFDMIYIVKDTHCAPRLT--ACEKLVNNYVRMR---------------IPITIRQLEAVVRMSESLAKMELLPFAEH--VEEAIRLFKVSTLEAAATGNLSGIEGFTSAEDAES--RIEKQLKKRFSVGTHVSE--VIQDF--QHYSEQLVKVI--ALIRRGDLQQRMQRRMLFR---------------------------------------------------------------------------------------------------------------------------------------------------------------------------------------------------------------------------------------------------RFEKRIYIPLPDGRK---MFRI----------------------------------------------------------------------------------------------------------------------------RKI-VPPHRYAPLKEKWVQIFTPCVKQL-LQIRYN-KARNVELRLGEDT----LQKGADFVKA-ILGFEVDDALALVRLDHLFLESFEVADVKFLKGEHVGRAIGRIAGKDGRTKLLIENVTKTRVVVADTKIHLLGSYQNIR-ARAICSLILG--------IKTPTNQKLLTNVAVVRLKKCGNRFEIACYKNKV-NWRNKTEKDIDEVLQSH-VFSNVSKGQLAKKEDLKAAFGEDA-QCCLAILEKGDLQVSDKERQ-ASDSAFKEVSQ-LASMVVNPETKRPIPPS-IDKALHEIHFALRPGRNAKQQALEVLPRL-MFLTRSEYDRGVNTFSPEGRLFQVEYAIEAVKLGSTSIGI-TKEGVLLAAEKRVSSKLMV-NTIEKI-KVDDHIGVTFAGLIADSRTLVERAQVESQNFWFTYNRKIRVEDVTQSVANLALQFGDDDAKSMSRPFGVAMLFA--GPKLFHLDPSGTFIDCLAKAIGAASDGAEQNLKE-YHESMTLQEG--KALSILKQVMEEKLI-ANVEYDRAITIFSPDGHLFQVEYAQEAVKKGSTAVGVRGKNCIVIGVEKKAIPALQDERTIRKIHMIDDHVMLAFAGLSADARILVDKARLECQSYKLTLEDPVTIAYIARFIANTKQRFTQSPGRRPFGISMLIG---FDGPRLFKTEPSGAYYEYLANSTGRGEKTVREYLEEQYD----------LLLVIKALSQVVQSG-QNIE-AVMRYDSRTTIFSPEGRLYQVEYAMEAISHAGTCLGILASDGIVIAAEKKNVHKLLD---TAEKIYRLSDNISCTVAGITADANILINHLRLSAAQYK-AYGEEIPVEQLVQDLCNQKQRYTQVGGKRPFGVSLLYAGWDRHYGYQLYQSDPSGNYTGWKATCIGNNHSAAVA-LKQEYK---STLEAK--LAMKVLSKTLD--KLAPEKVEMSVLVHYGFSLTTFSPSGKLMQIEYALNAVKNGQPSVGLKASDGVVLATENPS-SPLYEEQ---KIEI--SHIGCVYSGMGPDARLLVK-ARKIAITY--DYGEEISTTQLVTRLA-VMQEYTQSGGVRPFGVSLLIAGWKPLLFQCDPSGAYFAWKATALGKND-NAKTFLEKRFSE-LELDDGVHTSLLTLRECFDVGMTEDNVEVAVCGFHRL--KQVKDAGFDRHITIFSPEGRVYQVEYAFKAINSTNLTAVAVKGD--ACIAVQKRVPDKLIVSDSVTSVFL---TIGCAMIGM-PDSKFQVRRAILEATQWRYKHGHNMPAEQLAKRMADLNQFYTQNAEMRSLGCAMM-ISFDDEGPVMYRVDPAGYYRGVKG-SLGVKQQPANAFLEKKKK--ATIQLAI-ALHNALG-DVRAKDLEVVVVSKDQPKFTLTDEVEMSTIEEQACVYAALVLQDDDVAITGDKIATLLKAANVTVEPFWPGLFAKALEG-NVSDLI-SVSSSKISRDFLNETA-------IKRKFRETVELQIGLKNYDPQKDKRFSGSVRLKNIPKPHMKVCVLGDQQHCDEANANNLPCMNADDLKKLNKNKKLIKKLAKSYDAFLASESLIKQIPRILGPGLNKAGKFPSVVSHADSLKVDEIKATIKFQMKKVLCLSVAIGHVEMSQEELVANASLAINFLISLLKKNWQNVRSLTVKSTMGKPQRLYMPPKFDPTEIKIVYLRCVGGEVGATSALAPKVGPLGLSPKKVGDDIAKATGDWKGLKVTCKLTIQNRQAKIDVVPSAASLIIKELKEPPRDRKKVKNVKHNGNITFDALLKIARIMRRSMARKLEGTVLEILGTAQSVGCTVDGMHPHDLVDKIKGGE-EIPMGAYKYMQEIWRKKQSEVARYLQRVRMWQYRQ---LHRVNRPTRPEKARRLGFRSKQGFVVYRVRVRRGGRKRPVTKGQTYGKPKTHGVNELKNVRSHQAVAEGRVGKRCGALRVLSSYWIAEDSTYKFYEVVLIDPQHKAIRTNAELQWICKPVHKHREMRGLTSAGRKSRGLGKGHKFTQTKGGSRAKNWKRKNTKIFRRKRRIHYTAQPENSTKSCKAKGSDLRVHFKNTSEVASAIRGMSLKRAQRYLANVMEKKEIIPFRKFNGGVGRKAQCKAFKTQGRWPVKSCDYILQLLRNAESNAEYKGLDVDHLVIDHIQVQRAAKMRRRTYRAHGRINPYMSSPCHMEVILAEKDMKLETCIFSGYKIHPGHGKRAVRADGK-NIFLSAKCVRSH-LKRNPRDIPWTVLYRRKHKKGEEN---KRRAHKKVTATRAVGNTTLESILAKRNQKPEFRKAQRDAAVKKKIRTSVHFRRPKTLALPRTPRYPRKSVPR--KLDAFNIIKYPLTTESAMKSIEDTNTLVFVVD-RANKHQIKQAVKKLYQISVQKINTLVTPLATKKAYVRLAPDYDALDVANKIGIISHRKFSAPRHGSMGFAPKKRAKRITGKVKAFPKDDP-KPVHLTAFMGFKAGMTHIVREVDKPGSKVNKKEVVEAVTILETPPMVISGIVGYIDTPKGPRPFKTVFAEHLSEDFRRRMIKNYKSKKKAFTKYSKKWQDE-GKKAIEGDLNKMKKYCSSIRVV-NTQQKLLKHRNKKAHIMEVQLNGGSIADKVEWAKERLEKQVLI-QVFAQDEMVDTIGVTRGKGFKGVTSRWHTKKLPRKTHKGLRKVACIGAWHPSRVQFTVARAGQKGYHHRTEMNKKIYRIGKS---KKNGSTEFDVTEKTINPMGGFPHYGTVNQDYLMIKGAVIGPRKRPITLRKSLWTHTKRVAFEKITLKFIDTSSKFGHGRFQTTEEKRSAITEVVTREFTINLHKRIHGMSFKRRAPRAIDQIRKFAELQMKTKDVRIDSRLNKA-WSKGIRNVPYRVRVRLSRRRNDDEDS-HKLYTLVTYVPC-NFKKLTNVNVDLTKKHTRRFTRHESDRYYRIKPNWRKPKGIDNRVRRRFKGQRLMPNIGYGNAKNIRHVLPNGFKKVLVHNAKDLDMLLMNNKRYCGEVAHAVSAKTRKIIVERAAALNIKLTNGHARIRTEEHEKGRKVT-QTRHKGKKAKIVRELVREVTGFSPYEKRAMELLKISKDKKALKFIKKRLGSHIRAKAKRDEMQNL--QLRKMTKGTQAFGKRHNKTHTLCRRCGRSSYHIQKH-CASCGYPAAK-RVYQWSVKAIRRRTTGTGRMRHLKKVQRRFKNGFREGMGSHKTFIVKRTLAKAQKQNRPLPQWVRMKTGNTIKYNAKRRHWRRTKLKLDKSTWKANYFTKI-ELFDEYPKCFIVGVDNVGSKQMQEIRHAMRGHAVILMGKNTMIRKAIRANLAKNPSLEKLLPYIVQNVGFVFTKEDLSEIRDKLLENRRGAPAKAGAIAPCDVKLPPQNTGMGPEKTSFFQALQIPTKIARGTIEILNEVHLISIGDKVGASEAALLNMLGIMPFSYGLV--QVYDNGTIYAPQVLDLSTSELRSRFLQGVRNVAA-SLAIKYPTAASVPHSIAAGLQSMLGIAAVTDFKQAEK-KAYLANPGAFVDPFTRKEWYDIKAPSMF--RQVGKTLVNRTQGTKIASDGLKGRVFEVSLGDLNGSESDFRKFRLICEDVQGKNVLTNFHGMSFTRDKLCSIVKKWHTMVEANCAVKTTDGYLLRLFCIGFTSK--KKTCYAQSSKVRQIRAKMVEHIQKEVASCDLKEVCNKLIPDSIGKDIEKACSFIYPLQDVYIRKVKIIKKPRFELGRLMDVHGPDDYEPPVQESVMLIPKKNRNSIYEYLFSEGV-VAKKDFN-KSHVSNLEVIKALKSLTSRGYVKEQFAWRHYYWYLTNEGQTYLREYLNLPEGIVPATVKERAYQKQPTVFLNSK---RYVRNVGLGFKTPLEAINGTYIDKKCPFTGGVSIRGRILTGVV-KMKMNRTIVIRRDYLHFVKKYRRYERRHKNMSVHCSPAFRDIQ-GDIVTAGECRTLAKTVHFNVLKVKKHRIRITLTSQNVAALEKVCTLLIDSAKQKELQVKGPIRMPTKVLRITTRKTPCGEGSKTWDRYQMRIHKRVINMHSPSDVLHQVTSISIEPGVDVEVTIADTIRTRKVMTNRLLARKQMVVEIIHPSRPSVPKTEIKDKLASLYKTTSDLVIPFGFRCKFGGGKSVGFALIYDTLDLAKKFEPKHRLIAGSLKKRKQRKERKNRQKKAFGTAKVRDKLNNAVLFDAATYDKLYKEVITYKLITPSVVSERLKVRASLAK-GLRELQAKGLVKCIVKHSGQLVYTRATRGPKHHLKRLTAPHHWMLDKLGGVFAPRPTSGPHKLRESLPLILFLRNRLKYALTY-EARKICKQRLIKVDGKVRTEMRFPAGFMDVISIEKTNETFRLLYDTKGRFVCHRIT-QEGNYKLCKITKVSVGPKGVPFVNTHDGRTIRYPDPHVKIDDTIVLDVNTSKI-DFVKFDAGNLAMITGGRNIGRVGSIVNRERHPGAFDIVHVKDT-GHTFATRVNNVFVIGKG-KPLVSLTAQKGIKLSITEERDKRMKLNVAYPATGQQKSFEVEEDKRLRVFFEKRMAQEVEAD-IGEEWKGYVLRITGGNDKQGFPMKQGVLTNGRVRLLLGKGASCYRSRRTGERKRKSVRGCIVDAQMSALSLVVVKKGDNDIEGLTDSVVPRRLGPKRASKIRKLFNLSKEDDVRKYVIRRTV------DTKAPKIQRLVTP-RLQRKRTDLERQISGALADLDSSSEIKNQLRELFIVGVKEKKSVIVYVPYPQLKQFQKIQSRLVRELEKKLGGKHVLFIARRRILPKPMRPEKQKRPRSRTLTAVHEAMLNDIVFPAEVVGKRTRVKLDGKKIIKVHLDKAQQTNVEHKTETFASVYKHLTGKDVTFEFMGISRDSWHKRRATGGHR-PCHKKRKFELGRPAANTKIGAKRVHIVRARGGNLKYRALRLDTGNFSWGSEGTTRKTRIIDTVYNASNNELVRTKTLVKNTIVSIDAVPFRQWYESHYAQPIGRKKGTKF------AKVYKTRQTTAAVDPHVTEQFMAGKLLACVSSRPGQVGRCDGYILEGKELEFYLRKIRAKKLCNALVSRLTEMPNVVSVASPVTICGDIHGQFFDLLQLFTTGGQ-PDTSYVFLGDYVDRGRHSLETLTYLFALLFAYPDRMVLLRGNHETRRISQVYGFYDECLNKYGHSLVYRACCRVFDVMPIAAVVDNEIMCVHGGLSPEVRTLEKLSILDRAHEPPSKGPLCDIMW----------------------------------------------------------------------------AVIGDEDTVVGFLLGGVGELNKARKPNYLIVDKNTTVTEIEEAFKTFTSREDIAIILINQHIAEQIRFTVD--SIPAVLEIPSKEAPYDPSKDSILNRARGLFNPED--SIRTWVFLPIVIITFM-GVARHYVSLITNKKRDAAYLLRSRLLRENGRILPKNSYWMRKNSLVNDE-GYLSVANPMD-PETLTEMLKGNILNMVPMIFVGGWINWTFSGFVTTRVPFPLTLRFKPMLQRGIDLVSLDAAWVSSASWYFLCVFGLRSIYTLVLGEENVADQSKMMEDQM--AAGMAPPDP------VLAQLEHLQSKYTGTGHADCNRWEWITNQHRDTHASNMSHPGMLSHIAVVENESRARTRFNLLNRMVQPCGPPLEKPLELVLVIGDIHIPHRAFSIP-KFRKLLVPNKMQHVLSTGNLCTREMLDYLRSLTGDVHVVKGDFDDKASDSKVVTVGAFRIGLIHGHQIVPWGSDKALSTRAIQLDVDVLVSGHSHVCSSRVHKGILYLNPGSATGAFTPLPSFMLLDVQGDVMSVYIYRLVDDAVKVERVTHKKPDGDYERGKKVFKQRCLQCHVADSKAT-KTGPTLHGIIGRVSGTVEGFDYSAANKAKGVTWTKETLFEYLENPKKYIPGTKMVFAGLKKAGERADLIKYMEVESMEDDSGKTVELYIPRKCSASSRLIAANDHASIQIDFVIGKNR-YAICGEIRRMGESDDALVRLAQKDGIIPRN-NLKDAFEKQGFCHIRIQQRTGRKTITTVQGIAPEYDLKKICRYLKKEYNCNGTIVEHPEYGEVLQLTGDQRQQVKDFLCKVGIVKEENCKIHGFFEAKL-NAALLKKIVESIKELVTDA-FDCSESSMCLQAMDSSHVALVSLKLEVGLFDTYRCDRSFNLGMSLANMSKALKCANNDDCM-IKHDDDSVTFTFCDTKRDKTQDVTVKMMDIDSEHLGIPEQDYSVVISMPSSEFQKTCKDLSMFSDSLNITATKSGVTFSGKGDTGSSVVQYSNSSSADEKE-AINITVKEPVNVNFSIKYMNQFTKASSISDRVTLSLCNEVPVVVEY-----GHLRFYLAPKIGFVYGVSGPVVTAERMAGAAMYELVRVGHQELVGEIIRLEKDYATIQVYEETSGVTIGDPVRRTGKPLSVELGPGIMGSIFDGIQRPLK-I---MTSIYIPKGVNVNALSR---WDYRVGSHVTGGDLVGLVNENLLIKHRIMLPPNACGTVTFAAPAGSYTVEDVLLEVEFAGEK-KFTMLQVWPVRSPRPVAEKLAANNPLLCGQRVLDALFPCVQGGTTAIPGAFGCGKTVISQSLSKYSNSDAIIYVGCGERGNEMSEVLRDFPELTMEVEG-TTSIMKRTALVANTSNMPVAAREASIYTGITLAEYFRDMGLNVAMMADSTSRWAEALREISGRLGEMPADSGYPAYLAARLASFYERAGKVRCLGSPEREGSVTIVGAVSPPGGDFADPVTSATLGIVQVFWGLDKKLAQRKHFPSINWLVSYSKY-RSLEDYYEREYPEFVALRSKCREILQEEEDLSEIVQLVGKASLAESDKITLEVCKIIKDDFLQQNGYTPYDRFCPFYKTVGMLKNMI-FYELARHSIETTAISSKVTWLI--RDMGDLIYALTSMKFKDPVKDGEDKIKKDYDDLLE-MQTAFRNLEDFPSRMAQTVMK-RLKGAQKGHSLLKKKADALNMRFR-ILRKIVENKVLMGEVMKEAAFSLAEAKF--GDFSHTVIQNVSHAQYRVRMKKENVVGV-LPVFDSYQDGDAYDLTGLGKGGSNIAKLKKNYNKAIELLVELATLQTCFITLDEAIKVTNRRVNAIEHVIIPRVENTLSYIVTELDEMEREEFFRMKKIQNKMPQNEHIELHRKRFGRRLDHEERARKRQAREGHD-SAKAKKMRGIKAK--HKKRYSEKVEMRKLIKQHEEKEKTAVPAYLLDRQQTAGTVLSNMIKQKRKEKANKYQVPIPKVKAVSDAEAFKV-KTGKSRRKGWKRMVTKVTYVGESFTRKPAKFERFIRPMGLRFNKAHVTHPELQTTFCLPIVGVKKNPSSQMYTTLGVITKGTILEVNVSELGMVTQGGKVVWGKYAQVTNNPENDGCINAVLL
Mus_musculus                   RSTGEAVRSQNVMAAASIANIVKSSFGPVGLDKMLVDDIGDVTITNDGATILKLLEVEHPAAKVLCELADLQDKEVGDGTTSVVIIAAELLKNADELVKQKIHPTSVISGYRLACKEAVRYINENLIINTDELGRDCLINAAKTSMSSKIIGINGDYFANMVVDAVLAVKDARGQPRYPVNSVNILKAHGRSQIESMLINGYALNCVVGSQGMPKRIVNAKIACLDFSLQKTKMKLGVQVVITDPEKLDQIRQRESDITKERIQKILATGANVILTTGGIDDMYLKYFVEAGAMAVRRVLKRDLKHVAKASGASILSTLANLEGEETFEVTMLGQAEEVVQERICDDELILIKRTSASIILRGANDFMCDEMERSLHDALCVVKRVLELKSVVPGGGAVEAALSIYLENYATSMGSREQLAIAEFARSLLVIPNTLAVNAAQDSTDLVAKLRAFHNEAQVRKNLKWIGLDLVHGKPRDNKQAGVFEPTIVKVKSLKFATEAAITILRIDDLIK---KPAQIRFSNISAAKAVADAIRTSLGPKGMDKMIQDGKGDVTITNDGATILKQMQVLHPAARMLVELSKAQDIEAGDGTTSVVIIAGSLLDSCTKLLQKGIHPTIISESFQKALEKGLEILMSRPVQLSDRETLLNSATTSLNSKVVSQYSSLLSPMSVNAVMKSVDLRDIKIVKKLGGTIDDCELVEGLVLTQKGITRVEKAKIGLIQFCLSAPKTDMDNQIVVSDYAQMDRVLREERAYILNLVKQIKKTGCNVLLIQKSILRDALSDLALHFLNKMKIMVVKDVEREDIEFICKTIGTKPVAHIDQFTADMLGSAELAEEGSGKLFKITGCTSPTVTIVVRGSNKLVIEEAERSIHDALCVIRCLVKKRALIAGGGAPEIELALRLTEYSRTLSGMESYCVRAFADAMEVIPSTLAENAGLNPISTVTELRNRHAQGEKTTGINVRKGGISNILEEMVVQPLLVSVSALTLATETVRSILKIDD-------------------------------MAAKAVANTMRTSLGPNGLDKMMVDKDGDVTITNDGATILSMMDVDHQIAKLMVELSKSQDDEIGDGTTGVVVLAGALLEEAEQLLDRGIHPIRIADGYEQAARIAIQHLDKISDKVLVDINNEPLIQTAKTTLGSKVINSCHRQMAEIAVNAVLTVADMERRDVDFELIKVEGKVGGRLEDTKLIKGVIVDKDFSHPQMPKKVVDAKIAILTCPFEPPKPKTKHKLDVMSVEDYKALQKYEKEKFEEMIKQIKETGANLAICQWGFDDEANHLLLQNGLPAVRWVGGPEIELIAIATGGRIVPRFSELTSEKLGFAGVVQEISFGTTKDKMLVIEKCKNSRAVTIFIRGGNKMIIEEAKRSLHDALCVIRNLIRDNRVVYGGGAAEISCALAVSQEADKCPTLEQYAMRAFADALEVIPMALSENSGMNPIQTMTEVRARQVKESNPALGIDCLHKGSNDMQYQHVIETLIGKKQQISLATQMVRMILKIDDIR-KDVKFGADARALMLQGVDLLADAVAVTMGPKGRTVIIEQSWGSPKVTKDGVTVAKSIDLKDKYKNIGAKLVQDVANNTNEEAGDGTTTATVLARSIAKEGFEKISKGANPVEIRRGVMLAVDAVIAELKKQSKPVTTPEEIAQVATISANGDGNIISDAMKKVGRKGVITVKDGKTLNDELEIIEGMKFDRGYISPYFINTSKGQKCEFQDAYVLLSEKKISSVQSIVPALEIANRKPLVIIAEDVDGEALSTLVLNRLKVGLQVVAVKAPGFGDNRKNQLKDMAIATGGAVFGEEGLNLNLEDVQAHDLGKVGEVIVTKDDAMLLKGKGDKAHIEKRIQEITEQLDITTSEYEKEKLNERLAKLSDGVAVLKVGGTSDVEVNEKKDRVTDALNATRAAVEEGIVLGGGCALLRCIPALDSLKPANEDQKIGIEIIKRALKIPAMTIAKNAGVEGSLIVEKIGYDAMLGDFVNMVEKGIIDPTKVVRTALLDAAGVASLLTTAEAVVTEIPKYNFKKITVVPSAKDFIDLTLSKTQRKTPTVIHKHYQIHRIRHFYMRKVKFTQQNYHDRLSQILSDFPKLDDIHPFYADLMNILYDKDHYKLALGQINIAKNLVDNVAKDYVRLMKYGDSLYRCKQLKRAALGRMCTIIKRQRQSLEYLEQVRQHLSRLPTIDPNTRTLLLCGYPNVGKSSFINKVTRADVDVQPYAFTTKSLFVGHMDYKYLRWQVVDTPGILDHPLEDRNTIEMQAITALAHLRAAVLYVMDLSEQCGHGLKEQLELFQNIRPLFINKPLIVVANKCDVKRIAELTEEGVIQVKTEACDRLLAHRVETKMKGNKRLHLAVPNKRDKERPPFIPKRERDLELEMGDDYILDLQKYWEKYDKIPEIWEGHNVADYIDPXXXXXXXXXXXXXXXXXXXXXXXXXXXXXXXXXXXXXXXXXXXXXXXXXXXXXXXXXXXXXXXXXXXXXXXXXXXXXXXXXXXXXXXXXXXXXXXXXXXXXXXXXXXXXXXXXXXXXXXXXXXXXXXXXXXXXXXXXXXXXXXXXXXXXXXXXXXXXXXXXXXXXXXXXXXXXXXXXXXXXXXXXXXXXXXXXXXXXXXXXXXXXXXXXXXXXXXXXXXXXXXXXXXXXXXXXXXXXXXXXXXXXXXXXXXXXXXXXXXXXXXXXXXXXXXXXXXXXXXXXXXXXXXXXXXXXXXXXXXXXXXXXXXXXXXXXXXXXXXXXXXXXXXXXXXXXXXXXXXXXXXXXXXXXXXXXXXXXXXXXXXXXXXXXXXXXXXXXXXXXXXXXXXXXXXXXXXXXXXXXXXXXXXXXXXXXXXXXXXXXXXXXXXXXXXXXXXXXXXXXXXXXXXXXXXXXXXXXXXXXXXXXXXXXXXXXXXXXXXXXXXXXXXXXXXXXXXXXXXXXXXXXXXXXXXXXXXXXXXXXXXXXXXXXXXXXXXXXXXXXXXXXXXXXXXXXXXXXXXXXXXXXXXXXXXXXXXXXXXXXXXXXXXXXXXXXXXXXXXXXXXXXXXXXXXXXXXXXXXXXXXXXXXXXXXXXXXXXXXXXXXXXXXXXXXXXXXXXXXXXXXXXXXXXXXXXXXXXXXXXXXXXXXXXXXXXXXXXXXXXXXXXXXXXXXXXXXXXXXXXXXXXXXXXXXXXXXXXXXXXXXXXXXXXXXXXXXXXXXXXXXXXXXXXXXXXXXXXXXXXXXXXXXXXXXXXXXXXXXXXXXXXXXXXXXXXXXXXXXXXXXXXXXXXXXXXXXXXXXXXXXXXXXXXXXXXXXXXXXXXXXXXXXXXXXXXXXXXXXXXXXXXXXXXXXXXXXXXXXXXXXXXXXXXXXXXXXXXXXXXXXXXXXXXXXXXXXXXXXXXXXXXXXXXXXXXXXXXXXXXXXXXXXXXXXXXXXXXXXXXXXXXXXXXXXXXXXXXXXXXXXXXXXXXXXXXXXXXXXXXXXXXXXXXXXXXXXXXXXXXXXXXXXXXXXXXXXXXXXXXXXXXXXXXXXXXXXXXXXXXXXXXXXXXXXXXXXXXXXXXXXXXXXXXXXXXXXXXXXXXXXXXXXXXXXXXXXXXXXXXXXXXXXXXXXXXXXXXXXXXXXXXXXXXXXXXXXXXXXXXXXXXXXXXXXXXXXXXXXXXXXXXXXXXXXXXXXXXXXXXXXXXXXXXXXXXXXXXXXXXXXXXXXXXXXXXXXXXXXXXXXXXXXXXXXXXXXXXXXXXXXXXXXXXXXXXXXXXXXXXXXXXXXXXXXXXXXXXXXXXXXXXXXXXXXXXXXXXXXXXXXXXXXXXXXXXXXXXXXXXXXXXXXXXXXXXXXXXXXXXXXXXXXXXXXXXXXXXXXXXXXXXXXXXXXXXXXXXXXXXXXXXXXXXXMGRRPARCYRYCKNKPYPKSRFCRGVPDAKIRIFDLGRKKAKVDEFPLCGHMVSDEYEQLSSEALEAARICANKYMVKSCGKDGFHIRVRLHPFHVIRINKMLSCAGADRLQTGMRGAFGKPQGTVARVHIGQVIMSIRTKLQNKEHVIEALRRAKFKFPGRQKIHISKKWGFTKFNADEFEDMVAEKRLIPDGCGVKYIPNRGPLFDDMNLKESLLRGIYAYGFEKPSAIQQRAIIPCIKGYDVIAQAQSGTGKTATFAISILQQLEIEFKETQALVLAPTRELAQQIQKVILALGDYMGATCHACIGGTNVRNEMQKLQHIVVGTPGRVFDMLNRRYLSPKWIKMFVLDEADEMLSRGFKDQIYEIFQKLQVVLLSATMPTDVLEVTKKFMRDPIRILVKKEELTLEGIKQFYINVEREEWKLDTLCDLYETLTITQAVIFLNTRRKVDWLTEKMHARDFTVSALHGDMDQKERDVIMREFRSGSSRVLITTDLLARGIDVQQVSLVINYDLPTNRENYIHRIGRGGRFGRKGVAINFVTEEDKRILRDIETFYNTTVEEMPMNVADLIFENNCEVGCFAKLTNAYCLVAIGGSENFYSVFEGELSDAIPVVHASIAGCRIIGRMCVGNRHGLLVPNNTTDQELQHIRNSLPDSVQIRRVEERLSALGNVTTCNDYVALVHPDLDRETEEILADVLKVEVFRQTVADQVLVGSYCVFSNQGGLVHPKTSIEDQDELSSLLQVPLVAGTVNRGSEVIAAGMVVNDWCAFCGLDTTSTELSVVESVFKLXXXXXXXXXXXXXXXXXXXXXXXXXXXXXXXXXXXXXXXXXXXXXXXXXXXXXXXXXXXXXXXXXXXXXXXXXXXXXXXXXXXXXXXXXXXXXXXXXXXXXXXXXXXXXXXXXXXXXXXXXXXXXXXXXXXXXXXXXXXXXXXXXXXXXXXXXXXXXXXXXXXXXXXXXXXXXXXXXXXXXXXXXXXXXXXXXXXXXXXXXXXXXXXXXXXXXXXXXXXXXXXXXXXXXXXXXXXXXXXXXXXXXXXXXXXXXXXXXXXXXXXXXXXXXXXXXXXXXXXXXXXXXXXXXXXXXXXXXXXXXXXXXXXXXXXXXXXXXXXXXXXXXXXXXXXXXXXXXXXXXXXXXXXXXXXXXXXXXXXXXXXXXXXXXXXXXXXXXXXXXXXXXXXXXXXXXXXXXXXXXXXXXXXXXXXXXXXXXXXXXXXXXXXXXXXXXXXXXXXXXXXXXXXXXXXXXXXXXXXXXXXXXXXXXXXXXXXXXXXXXXXXXXXXXXXXXXXXXXXXXXXXXXXXXXXXXXXXXXXXXXXXXXXXXXXXXXXXXXXXXXXXXXXXXXXXXXXXXXXXXXXXXXXXXXXXXXXXXXXXXXXXXXXXXXXXXXXXXXXXXXXXXXXXXXXXXXXXXXXXXXXXXXXXXXXXXXXXXXXXXXXXXXXXXXXXXXXXXXXXXXXXXXXXXXXXXXXXXXXXXXXXXXXXXXXXXXXXXXXXXXXXXXXXXXXXXXXXXXXXXXXXXXXXXXXXXXXXXXXRKIPVPGNRYTPLKENWMKIFTPIVEHLGLQIRFNLKSRNVEIRTCKDTDVSALTKAADFVKAFVLGFQVEDALALIRLDDLFLESFEITDVKPLKGDHLSRAIGRIAGKGGKTKFTIENVTRTRIVLADVHVHILGSFQNIKMARAICNLILGNPPSKVYGXXXXXXXXXXXXXXXXXXXXXXXXXXXXXXXXXXXXXXXXXXXXXXXXXXXXXXXXXXXXXXXXXXXXXXXXXXXXXXXXXXXXXXXXXXXXXXXXXXXXXXXXXXXXXXXXXXXXXXXXXXXXXXXXXXXXXXXXXXXXXXXXXXXXXXXXXXXXXXXMFLTRSEYDRGVNTFSPEGRLFQVEYAIEAIKLGSTAIGIQTSEGVCLAVEKRITSPLMEPSSIEKIVEIDAHIGCAMSGLIADAKTLIDKARVETQNHWFTYNETMTVESVTQAVSNLALQFGEEDADAMSRPFGVALLFGEKGPQLFHMDPSGTFVQCDARAIGSASEGAQSSLQEVYHKSMTLKEAIKSSLIILKQVMEEKLNATNIEXXXXXXXXXXXXXXXXXXXXXXXXXXXXXXXXXXXXXXXXXXXXXXXXXXXXXXXXXXXXXXXXXXXXXXXXXXXXXXXXXXXXXXXXXXXXXXXXXXXXXXXXXXXXXXXXXXXXXXXXXXXXXXXXXXXXXXXXXXXXXXXXXXXXXXXXXXXXXXXXXXXXXXXXXXXXXXXXXXXXXXXXXXXXXXXXXXXXXXXXXXXXXXXXRYDSRTTIFSPEGRLYQVEYAMEAIGHAGTCLGILANDGVLLAAERRNIHKLLDEVFFSEKIYKLNEDMACSVAGITSDANVLTNELRLIAQRYLLQYQEPIPCEQLVTALCDIKQAYTQFGGKRPFGVSLLYIGWDKHYGFQLYQSDPSGNYGGWKATCIGNNSAAAVSMLKQDYKEGEMTLKSALALAVKVLNKTMDVSKLSAEKVEIATLTR--FSLTTFSPSGKLVQIEYALAAVAGGAPSVGIKAANGVVLATEKKQKSILYDERSVHKVEPITKHIGLVYSGMGPDYRVLVHRARKLAQQYYLVYQEPIPTAQLVQRVASVMQEYTQSGGVRPFGVSLLICGWRPYLFQSDPSGAYFAWKATAMGKNYVNGKTFLEKRYNEDLELEDAIHTAILTLKESFEGQMTEDNIEVGICGFRRLTPTEVRD--FDRHITIFSPEGRLYQVEYAFKAINQGGLTSVAVRGKDCAVIVTQKKVPDKLLDSSTVTHLFKITESIGCVMTGMTADSRSQVQRARYEAANWKYKYGYEIPVDMLCKRIADISQVYTQNAEMRPLGCCMILIGIDEEGPQVYKCDPAGYYCGFKATAAGVKQTESTSFLEKKVKKKQTVETAITCLSTVLSIDFKPSEIEVGVVTVENPKFRILTEAEXXXXXXXXXXXXXXXXXXXXXXXXXXXXXXXXXXXXXXXXXXXXXXXXXXXXXXXXXXXXXXXXXSKVSRDTLYEAVREVLHGNKRRKFLETVELQISLKNYDPQKDKRFSGTVRLKSTPRPKFSVCVLGDQQHCDEAKAVDIPHMDIEALKKLNKNKKLVKKLAKKYDAFLASESLIKQIPRILGPGLNKAGKFPSLLTHNENMKVDEVKSTIKFQMKKVLCLAVAVGHVKMTDDELVYNIHLAVNFLVSLLKKNWQNVRALYIKSTMGKPQRLYMPPKFDPNEVKVVYLRCTGGEVGATSALAPKIGPLGLSPKKVGDDIAKATGDWKGLRITVKLTIQNRQAQIEVVPSASALIIKALKEPPRDRKKQKNIKHSGNITFDEIVNIARQMRRSLARELSGTIKEILGTAQSVGCNVDGRHPHDIIDDINSGAVECPMGAYKYIQELWRKKQSDVMRFLLRVRCWQYRQLSALHRAPRPTRPDKARRLGYKAKQGYVIYRIRVRRGGRKRPVPKGATYGKPVHHGVNQLKFARSLQSVAEERAGRHCGALRVLNSYWVGEDSTYKFFEVILIDPFHKAIRRNPDTQWITKPVHKHREMRGLTSAGRKSRGLGKGHKFHHTIGGSRRAAWRRRNTLQLHRYRMVRYSLDPENPTKSCKSRGSNLRVHFKNTRETAQAIKGMHIRKATKYLKDVTLKKQCVPFRRYNGGVGRCAQAKQWGTQGRWPKKSAEFLLHMLKNAESNAELKGLDVDSLVIEHIQVNKAPKMRRRTYRAHGRINPYMSSPCHIEMILTEKEMKVELCSFSGYKIYPGHGRRYARTDGKVFQFLNAKCESAFLSKRNPRQINWTVLYRRKHKKGQSEEIQKKRTRRAVKFQRAITGASLADIMAKRNQKPEVRKAQRE----KKIRTSPTFRRPKTLRLRRQPKYPRKSAPRRNKLDHYAIIKFPLTTESAMKKIEDNNTLVFIVDVKANKHQIKQAVKKLYDIDVAKVNTLIRPDGEKKAYVRLAPDYDALDVANKIGIISHRKFSAPRHGHLGFLPHKRSRRHRGKVKSWPRDDPSQPVHLTAFLGYKAGMTHTLREVHRPGLKISKREEVEAVTIVETPPLVVVGVVGYVATPRGLRSFKTIFAEHLSDECRRRFYKDHKSKKKAFTKACKRWRDADGKKQLQKDFAAMKKYCKVIRVIVHTQMKLLPFRQKKAHIMEIQLNGGTVAEKVAWVQARMEKQVPVHSVFSQSEVIDVIAVTKGRGVKGVTSRWHTKKLPRKTHKGLRKVACIGAWHPARVGCSIARAGQKGYHHRTELNKKIYRIGRGKMVRNNASTSYDVTDKSITPLGGFPHYGEVNNDFIMLKGCIAGTKKRVITLRKSLLVHHSRRALENIELKFIDTTSKFGHGCFQTAQEK-SAINEVVTREYTINIHKRIHGVGFKKRAPRALKEIRKFAMKEMGTPDVRIDTRLNKAVWAKGIRNVPYRIRVRLSRKRNEDEDSPNKLYTLVTYVPVTTFKNLQTVN--IVKKRTKKFIRHQSDRYVKIKRNWRKPRGIDNRVRRRFKGQILMPNIGYGSNKKTKHMLPSGFRKFLVHNVKELEVLLMCNKSYCAEIAHNVSSKNRKAIVERAAQLAIRVTNPNARLRSEENEXXXXXXXXXXXXXXXXXXXXXXXXXXXXXXXXXXXXXXXXXXXXXXXXXXXXXXXXXXXXXXXXXXXXXXXXXXXXXXXXXXXXXXXXXXXXXXXXXXXXXXXXXXXXXXXXXXXXXXXXXXXXXXXXXXXXXXXXXXXXXXXXXXXXXXXXXXXXXXXXXXXXXXXXXXXXXXXXXXXXXXXXXXXXXXXXXXXXXXXXXXXXXXXXXXDRATWKSNYFLKIIQLLDDYPKCFIVGADNVGSKQMQQIRMSLRGKAVVLMGKNTMMRKAIRGHLENNPALEKLLPHIRGNVGFVFTKEDLTEIRDMLLANKVPAAARAGAIAPCEVTVPAQNTGLGPEKTSFFQALGITTKISRGTIEILSDVQLIKTGDKVGASEATLLNMLNISPFSFGLIIQQVFDNGSIYNPEVLDITEQALHSRFLEGVRNVASVCLQIGYPTVASVPHSIINGYKRVLALSVETEFPLTEKVKAFLADPSAFVDPFSKKDWYDVKAPAMFNIRNIGKTLVTRTQGTKIASDGLKGRVFEVSLADLQNDEVAFRKFKLITEDVQGKNCLTNFHGMDLTRDKMCSMVKKWQTMIEAHVDVKTTDGYLLRLFCVGFTKKQIRKTSYAQHQQVRQIRKKMMEIMTREVQTNDLKEVVNKLIPDSIGKDIEKACQSIYPLHDVFVRKVKMLKKPKFELGKLMELHGADGYEPPVQESVMLMPKKNRIAIYELLFKEGVMVAKKDVHMPKHVPNLHVMKAMQSLKSRGYVKEQFAWRHFYWYLTNEGIQYLRDYLHLPPEIVPATLRERAYQKQPTIFQNKKKLPRYYKNIGLGFKTPKEAIEGTYIDKKCPFTGNVSIRGRILSGVVTKMKMQRTIVIRRDYLHYIRKYNRFEKRHKNMSVHLSPCFRDVQIGDIVTVGECRPLSKTVR--------HRIRITLTSRNVKSLEKVCADLIRGAKEKNLKVKGPVRMPTKTLRITTRKTPCGEGSKTWDRFQMRIHKRLIDLHSPSEIVKQITSISIEPGVEVEVTIADTIRTRKFMTNRLLQRKQMVIDVLHPGKATVPKTEIREKLAKMYKTTPDVIFVFGFRTHFGGGKTTGFGMIYDSLDYAKKNEPKHRLARHGLYERKQRKERKNRMKKVRGTAKXXXXXXXXXXXXXXXXXXXXXXXXXXXXXXXXXXXXXXXXXXXXXXXXXXXXXXXXXXXXXXXXXXXXXXXXXXRGPKKHLKRVAAPKHWMLDKLTGVFAPRPSTGPHKLRECLPLIIFLRNRLKYALTGDEVKKICMQRFIKIDGKVRTDITYPAGFMDVISIDKTGENFRLIYDTKGRFAVHRITPEEAKYKLCKVRKIFVGTKGIPHLVTHDARTIRYPDPLIKVNDTIQIDLETGKITDFIKFDTGNLCMVTGGANLGRIGVITNRERHPGSFDVVHVKDANGNSFATRLSNIFVIGKGNKPWISLPRGKGIRLTIAEERDKRMKLNISFPATGCQKLIEVDDERKLRTFYEKRMATEVAADALGEEWKGYVVRISGGNDKQGFPMKQGVLTHGRVRLLLSKGHSCYRPRRTGERKRKSVRGCIVDANLSVLNLVIVKKGEKDIPGLTDTTVPRRLGPKRASRIRKLFNLSKEDDVRQYVVRKPL-NKEGKRTKAPKIQRLVTPRVLQHKRDEFESGISQALLELEMNSDLKAQLRELNITAAKERKAIIIFVPVPQLKSFQKIQVRLVRELEKKFSGKHVVFIAQRRILPKPTRKNKQKRPRSRTLTAVHDAILEDLVFPSEIVGKRIRVKLDGSRLIKVHLDKAQQNNVEHKVETFSGVYKKLTGKDVNFEFMGISRDNWHKRRKTGGKRKPYHKKRKYELGRPAANTKIGPRRIHTVRVRGGNKKYRALRLDVGNFSWGSECCTRKTRIIDVVYNASNNELVRTKTLVKNCIVLIDSTPYRQWYESHYALPLGRKKGAKLKRSKKIQKKYDERKKNAKISSLLEEQFQQGKLLACIASRPGQCGRADGYVLEGKELEFYLRKIKARKXXXXXXXXXXXXXXXXXXXXXXXXXXXXXXXXXXXXXXXXXXXXXXXXXXXXXXXXXXXXXXXXXXXXXXXXXXXXXXXXXXXXXXXXXXXXXXXXXXXXXXXXXXXXXXXXXXXXXXXXXXXXXXXXXXXXXXXXXXXXXXXXXXXXXXXXXXXXXXXXXXXXXXXXXXXXXXXXXXXXXXXXXXXXXXXXXXXXXXXXXXXXXXXXXXXXXXXXXXXXXXXXXXXXXXXXXXXXXXXXXXGKLIAVIGDEDTVTGFLLGGIGELNKNRHPNFLVVEKDTTINEIEDTFRQFLNRDDIGIILINQYIAEMVRHALDAHSIPAVLEIPSKEHPYDAAKDSILRRAKGMFTAEDDSNIRLWVVLPIVIITFFVGMIRHYVSILLQSDKDSQVLIRSRVLRENGKYIPKQSFLTRKYYFNNPEDGFFKKTSPMTDPTMLTDMMKGNVTNVLPMILIGGWINMTFSGFVTTKVPFPLTLRFKPMLQQGIELLTLDASWVSSASWYFLNVFGLRSIYSLILGQDNAADQSRMMQEQMTGAAMAMPADT-TDRYTIHSQLEHLQSKYIGTGHADTTKWEWLVNQHRDSYCSYMGHFDLLNYFAIAENES-ARVRFNLMEKMLQPSGPPADKPE-XXXXXXXXXXXXXXXXXXXXXXXXXXXXXXXXXXXXXXXXXXXXXXXXXXXXXXXXXXXXXXXXXXXXXXXXXXXXXXXXXXXXXXXXXXXXXXXXXXXXXXXXXXXXXXXXXXXXXXXXXXXXXXXXXXXXXXXXXXXXXXXXXXXXXXXXXXXXXXXXXXXXXXXXXXXXX--GDVEKGKKIFVQKCAQCHTVEKGGKHKTGPNLHGLFGRKTGQAAGFSYTDANKNKGITWGEDTLMEYLENPKKYIPGTKMIFAGIKKKGERADLIAYLKKATXXXXXXXXXXXXXXXXXXXXXXXXXXXXXXXXXXXXXXXXXXXXXXXXXXXXXXXXXXXXXXXXXXXXXXXXXXXXXXXXXXXXXXXXXXXXXXXXXXXXXXXXXXXXXXXXXXXXXXXXXXXXXXXXXXXXXXXXXXXXXXXXXXXXXXXXXXXXXXXXXXXXXXXXFEARLIQGSILKKVLEALKDLINEACWDVSSGGVNLQSMDSSHVSLVQLTLRSEGFDTYRCDRNLAMGVNLTSMSKILKCAGNEDIITLRAEDDTLALVFEAPNQEKVSDYEMKLMDLDVEQLGIPEQEYSCVIKMPSGEFARICRDLSHIGDAVVISCAKNGVKFSASGELGNGNIKLSQTSNVDKEEEAVTIEMNEPVHLTFALRYLNFFTKATPLSPTVTLSMSADVPLVVEYKIADMGHLKYYLAP--XXXXXXXXXXXXXXXXXXXXXXXXXXXXXXXXXXXXXXXXXXXXXXXXXXXXXXXXXXXXXXXXXXXXXXXXXXXXXXXXXXXXXXXXXXXXXXXXXXXXXXXXXXXXXXXXXXXXXXXXXXXXXXXXXXXXXXXXXXXXXXXXXXXXXXXXXXXXXXXXXXXXXXXXXXXXXXXXXXXXXXXXXXXXXXXXXXXXXXXXXXXXXXXXXXXXXXXXXXXXXXXXXXXXXXXXXXXXXXXXXXXXXXXXXXXXXXXXXXXXXXXXXXXXXXXXXXXXXXXXXXXXXXXXXXXXXXXXXXXXXXXXXXXXXXXXXXXXXXXXXXXXXXXXXXXXXXXXXXXXXXXXXXXXXXXXXXXXXXXXXXXXXXXXXXXXXXXXXXXXXXXXXXXXXXXXXXXXXXXXXXXXXXXXXXXXXXXXXXXXXXXXXXXXXXXXXXXXXXXXXXXXXXXXXXXXXXXXXXXXXXXXXXXXXXXXXXXXXXXXXXXXXXXXXXXXXXXXXXXXXXXXXXXXXXXXXXXXXXXXXXXXXXXXXXXXXXXXXXXXXXXXXXXXXXXXXXXXXXXXXXXXXXXXXXXXXXXXXXXXXXXXXXXXXXXXXXXXXXXXXXXXXXXXXXXXXXXXXXXXXXXXXXXXXXXXXXXXXXXXXXXXXXXXXXXXXXXXXXXXXXXXXXXXXXXXXXXXXXXXXXXXXXXXXXXXXXXXXXXXXXXXXXXXXXXXXXXXXXXXXXXXXXXXXXXXXXXXXXXXXXXXXXXXXXXXXXXXXXXXXXXXXXXXXXXXXXXXXXXXXXXXXXXXXXXXXXXXXXXXXXXXXXXXXXXXXXXXXXXXXXXXXXXXXXXXXXXXXXXXXXXXXXXXXXXXXXXXXXXXXXXXXXXXXXXXXXXXXXXXXXXXXXXXXXXXXXXXXXXXXXXXXXXXXXXXXXXXXXXXXXXXXXXXXXXXXXXXXXXXXXXXXXXXXXXXXXXXXXXXXXXXXXXXXXXXXXXXXXXXXXXXXXXXXXXXXXXXXXXXXXXXXXXXXXXXXXXXXXXXXXXXXXXXXXXXXXXXXX
Tetrix_subulata                RSSGTPVRTQNVMAACSIANIVKSSLGPVGLDKMLVDDIGDVTVTNDGATILRLLEVEHPAARVLVELAQLQDDEVGDGTTSVVIIAAELLRNADELVKQKIHPTSIISGYRLACKEACKYIQEHLTVGVEDLGRECLVNAAKTSMSSKLIGADADFFANMVVDAAQAVKDGKLGVLYPIKAVNILKAHGKSARESILVPGYALNCTVASQAMPKKIVNAKIACLDFSLQKVKMKLGVQVLITDPEKLEGIRQRECDITKERIQKILAAGTNVILCTGGIDDLCLKYFVEAGAMAVRRVKKQDLKRIAKATGATYLTSLSNMEGEESFELTAVGEAAEVVQDIICDDELILIKRTASSIILRGPNDFYTDEMERSVHDALCVVKRVLESKSVVAGGGCVEAALSIYLENFATSLSSREQLAIAEFARSLLVIPKTLAVNAAQDATDLVAKLRAYHNSSQTHAHLKWIGLDLYEGTVRDSKKAGVLEPAVSKIKALKFATEAAITILRIDDMIRLKSKPAEIRSSNINAAKAVADAIRTSLGPRGMDKMIQAANGEVTITNDGATILKQMNVMHPAAKMLVELSKAQDVEAGDGTTSVVVVAGSLLEAAQKLLLKGIHPTSISDAFQRAAAKSVEILMSRPVELTDKESLIRSAATALNSKVVSQHSNLLAPLAVESVLKNVDLKDIKIIKKLGGTVEDTELVDGLVFTQKGPHRVEKAKIGLIQFCISPPKTDMDHNVIVSDYAAMDRVLKEERAYILNIVKQIKKTGCNVLLVQKSILRDAVSDLAIHFLDKIKVMVIKDIEREDIEFVSKTLGLRPIASLDHFLPEYLASADLVEEGTSKFVKVTGIQNATVTVLVRGSNKLVLEEADRSLHDALCVVRCLVKQRALIAGGGAPEIELALRLAQHAQTITGIDAYCFRAFANAMEVIPSTLAENAGLNAISTVTELRNRHAQGDISAGINVRKGAITNMLEENVLQPLLVSVSAITLASETVRSILKIDDIFDEYGRPFIIIRDQQNQQRLTGTDAIKSHIFAGKSIANTLKTSLGPKGLDKMMVSSDGDVTVTNDGATILKQMDVDHEIAKLMVQLSQSQDDEIGDGTTGVVVLAGALLEQAEQLLDKGIHPIRIADGFELAAQYAVKHLENICESFPIDFDNEPLIQTAMTTLGSKIVNKCHRQMAEIAVNAVMAVADMEKKDVNFELIKVTSKVGGRLEDTMLVKGVVIDKDFSHPQMPKVLKDVKIAILTCPFEPPKPKTKHKLDVTSVEDYKALRAYEAEKFSEMVQQVKDAGATLALCQWGFDDEANHLLLQKGLPAIRWVGGPEIELVAIATGGRIVPRFEELSPDKLGHAGLVRELHFGTTKDHMLVIEECKNSRAVTIFIRGGNKMIIEEAKRSLHDALCVVRNLIQDNRIVYGGGAAEISCALAVSAEADKISSLEQYAFRSFAEALESIPLALAENSGLSPIHTLTEVKARQAVDKNPALGIDCMLNGTSDMKVQHVIESLHSKKQQIILATQLVKMILKIDDVRAKDVRFGPEVRALMLQGVDILADAVAVTMGPKGRNVILEQSWGSPKITKDGVTVAKGVELKDKFQNIGAKLVQDVANNTNEEAGDGTTTATVLARAIAKEGFEKISKGANPIEIRRGVMMAVDAIKENLKTLSKQVTTPEEIAQVATISANGDGDLISEAMKRVGKEGVITVKDGKTLNDELEVIEGMKFDRGYISPYFINTAKGAKVEFQDALLLLSEKKISNVQSIIPALELANRKPLVIIAEDVDGEALSTLVVNRLKIGLQVAAVKAPGFGDNRKATLQDIAIASGGIVFGDEGNPVKLEDLQQSDLGQVGEIVITKDDTLMLKGKGKKSDIDRRADQLRDQIDSTTSEYEKEKLQERLARLASGVAVLKVGGSSEVEVNEKKDRVNDALNATRAAVEEGIVPGGGTALLRCIPILKNLKPANSDQTTGIDIVRQALRMPCMQIAKNAGIDASVVVSKVGYDALNNEYVNMIEKGIIDPTKVVRTALTDAAGVASLLTTAEAVVTDIPKYNFKKIAVVPPAKDFIDIILSKTQRKTPTVVHKNYKIPRIRQFYMRKVKYTQQNFHDRLSQIIQEFPKLDDIHPFYADLMNVLYDKDHYKLALGQINTARHLIDNVAKEYVRLLKFGDSLYRCKQLKKAALGRMATIMKRQGPNLEYLEQVRQHLARLPSIDPFTRTILICGFPNVGKSSFINKVTRADVEVQPYAFTTKSLYVGHTDYKYLRWQVVDTPGILDHPLEDRNVIEMQAVTALAHLRAAVLYIMDLSEQCGHTVEEQVKLFESIKPLFTNKPLMVVFNKSDVIRMDELTDEGVMEVKIEACEKLLSYRIEMKMRTKKRLHVAVPSQRDKERAPFIPKLERDIEEEMGDDYVLDLKKNYYKYDVIPEMWQRHNIADYIDPKEHVNVVFIGHVDAGKSTIGGQIMNLTGMVDKRTLEKYEREAKEKSRETWYLSWALDTNQEEREKGKTVEVGRAYFETERKHFTILDAPGHKSFVPNMIGGAAQADLAVLVISARKGEFETGFDRGGQTREHAMLAKTAGVKHLVVLVNKMDDPTVEWSEERYNECRDKILPYLRKLGFNPQKDLTFMPCSGLTGLGLCPWYRGDAFIPFIDLPSLNRKMGGPFVMPVVDKYKDMGMVVMGKVEAGEAKKGQSLLLMPNRTTVLVDQMWSDDEEVTAVGAGENVKIKLKGIEEDDVSPGFVLCDNANPIKTGRIFDAQVVILEHKSIICAGYSAVMHIHCAAEEVNVIGLLCLVDKKSGEKSKSRPRFVKQDQVAIMRFEICMEQFKLFPQMGRFTLRDEEIRVMMDKKRNIRNMSVIAHVDHGKSTLTDSLVSKAGIIASAKAGETRFTDTRKDEQERCITIKSTAISMYFELDDKDLVFIGFLINLIDSPGHVDFSSEVTAALRVTDGALVVVDCVSGVCVQTETVLRQAIAERIKPVLFMNKMDRALLELQLESEDLYQTFQRIVENVNVIIATYSDGPMGEVRVDPSKGSVGFGSGLHGWAFTLKQFAEMYAEKFKIKLMKRLWGENFFNAKTKKWRSFCMYVLDPIYKFDCIMNKKEEAASLLQKLLKAEDKDKDGKALLKVVMRTWLPAGEALLQMIAIHLPSPVVAQKYRMEMLYEGPHDDEAAKNCDPNAPLMMYISKMVPTSDKGRFYAFGRVFSGKVATGMKARIMGPNYVPGKKEDLYEKAIQRTILMMGRYVEAIEDVPSGNICGLVGVDQFLVKTGTITTFKDAHNMRVMKFSVSPVVRVAVEPKNPADLPKLVEGLKRLAKSDPMVQCIIEESGEHIIAGAGELHLEICLKDLEEDHACIPIKKSDPVVSYRETVSEESDQMCLSKSPNKHNRLFMKAVPMPDGLAEDIDNGVNPRDEFKARARYLGEKYEYDVTEARKIWSFGPDGTGPNLLIDCTKGVQYLNEIKDSVVAGFQWATKEGVLSEENMRGVRFNIHDVTLHADAIHRGGGQIIPTTRRCLYACILTAQPRLMEPVYLCEIQCPEVAIGGIYGVLNRRRGHVFEEMQVAGTPMFVIKAYLPVNESFGFTADLRSNTGGQAFPQCVFDHWQILPGDPKPFIVLQDTRKRKGLKDGLPDVTQYLDKLDSGASVTYPMQCSALRKNGFVMLKSRPCKIVEMSTSKTGKHGHAKVHLVGIDIFNGKKYEDICPSTHNMDVPFVKREDYQLTDISDDGYLCLMDNGDLREDLKIPDGTVLKSCGEECVIATRTYDLHITYDKYYQTPRMWLSGYDENRKPLTVEQMYEDVSQDHAKKTVTMEAHPHMPGPPMASVHPCKHAEVMKKIIQTVTEGGGELGVHMYLIIFLKFVQAVIPTIEYDYMGRRPARCYRYCKNKPYPKSRFCRGVPDPKIRIFDLGRKKARVEDFPLCVHLVSDEYEQLSSEALEAGRICANKYMVKNCGKDQFHIRMRLHPFHVIRINKMLSCAGADRLQTGMRGAFGKPQGTVARVRIGQPIMSVRTSDRHKAAVIEALRRAKFKFPGRQKICVSKKWGFTKYERDVYEQLRDDGRLAQDGCNVKYRPEHGPLFDDMNLKEELLRGIYAYGFEKPSAIQQRAILPCIKGLDVIAQAQSGTGKTATFSISILQLIDTSLRECQALILAPTRELAQQIQKVVIALGDFMNAQCHACIGGTNVREDMRKLEHVVVGTPGRVYDMIIRRALRVNHIKLFVLDEADEMLSRGFKDQIHDVFKTLQVILLSATMPADVLEVTSCFMRQPIRILVKKEELTLEGIKQFFIFVEREDWKLETLCDLYDTLSITQAVIFCNTRRKVDALTESMHERDFTVSAMHGDMEQRERDVIMRQFRTGSSRVLITTDLLARGIDVQQVSLVINYDLPSNRENYIHRIGRGGRFGRKGVAINFVTQEDKRVLEDIEKFYNTSIEEMPLNVADLIFENNNEVGVFAKLTNTYCLVAIGGSENFYSVFEAELADTIPIIHASLAGCRIVGRMCVGNRKGLLVPNSTTDTELQHLRNSLPDEVRVQRVEERLSALGNVIACNDYVALVHPDLDRETEEILTDVLNVEVFRQTIASNVLVGSYCALSNQGGLVHPQTSVQDQDELSSLLQVPLVAGTINRGSEVIGAGMVVNDWCSFCGRDTTSTEISVIESIFKL-------------------------------------------------------------------------------------------MEGGAMVLADGGVVCIDEFDKMREDDRVAIHEAMEQQTISIAKAGITATLNSRCSVFAAANSVFGRWDDTKGEENIDFMPTILSRFDMIFIVKDEHCGPRLSESAGEKLRNRYVLMRSGTREHELESEKRLSIPITVRQLEAIIRISESLAKMRLQPFVTEAYVDEALRLFQVSTLDAAMSGSLAGAEGFTTEEDYETLGRIEKQLKKRFAIGSQVSEHNIVQDFLRQKYPERAIYKVIHTMIRRGELQHRMQRKMLYRLQKAIDLVTRATEEDKNKNYEEALKLYEHGVEYFLHAIRYEAHGEKSKESIRAKCVQYLERAEKLKKKLQSKLEGAIIVEKPCVKWSDVAGLELAKEALKEAVILPIKFPHLFTGKRIPWKGILLFGPPGTGKSYLAKAVATEANNSTFFSVSSSDLVSKWLGESEKLVKNLFELARQHKPSIIFIDEVDSLCSSRSDNESESARRIKTEFLVQMQGVGNDNDGILVLGATNIPWVLDAAIRRRFEKRIYIPLPEEHARLTMFKLHLGTRHTLLASKTDGYSGADISIVVRDALMQPVRKVQTATHFRKVRGPSPLDPNVIEDDLLSPCSPGSPGAIEMTWVDVPGPKLLEPPVSMSDMLRSLATSKPTVNDEDLFKLDKFKDDFGQEG----VPAHRYTPLKDNWMKIFSPVVEHLHLQIRFNLKSRNVEIRTCPETDVANLQKAADFVRAFILGFDVEDALALLRLDDLFIDSFQIHDVKTLKGDHCSRAIGRLAGKGGRTKFTIENVTKTRIVLADSKIHILGSFQNIQVARALCNLILGSPPSKVYG--TTVNQIRLTNVSVVRMKKAGKRFEIACYKNKVVSWRNNIETDLDEVLQTHTVFTNVSKGQVAKKEDLMKAFGDDQTEVCKEILAKGELQVSDKERQSHLDSLLKDIATTVADKCVNPETKRPYTVSMIEKAMKDVHFSVKPNRNTKQQALDVIPLLKMFLTRSEYDRGVNTFSPEGRLFQVEYAIEAIKLGSTAIGICTNEGVVLAVEKRITSSLMEPTTIEKIVEVDKHIGCAVSGLMADSRTMLDRARIECQNHWFIYNEKMTVESAAQAVSNLAIQFGDSDDDAMSRPFGVAILFAERGPQLFHMDPSGTYVQFDAKAIGSGSEGAQQNLQEIYHKAMTLKEALNAALTILKQVMEEKLSSTNVEYDRAITVFSPDGHLLQVEYAQEAVRKGSTAVGVRGKDVVVLGVEKKSVAKLQEERTVRKICLLDDHVVMAFAGLTADARILINRAQIECQSHKLTVEDPVTLEYITRYIAGLKQKYTQSNGRRPFGISCLLAGFDYDGPHLYQTEPSGIYYEWKANATGRSAKTVREFLEKYYTPELVSTENGAVKLAIRALLEVVQSGRKNLEIAVM---------------------MEAISHAGTCLGILANDGILLAAERRNTNKLLDEVFFSEKIYKLNDDMVCSVAGITSDANVLTNELRMIAQRYLLQYGESIPCEQLVSWLCDVKQAYTQYGGKRPFGVSILYMGWDKHYGYQLYQSDPSGNYGGWKATCIGNNSAAAVSNLKQEYKEGETTLKDAQSLAIKVLSKTLDMTKLTSEKVEMATLTRYSFSLTTFSPSGKLVQIEYALAAVAAGAPSVGIKASNGIVLATENKHKSVLYEEHSVSKVELITKHIGMVYSGMGPDYRLLVKRARKMAQQYQLIYQEPIPTAQLVQRVAMVMQEYTQSGGVRPFGVSLLICGWKPYLFQCDPSGAYFAWKATAMGKNFINGKTFLEKRYSEDLELDDAVHTAILTLKEGFEGQMTADNIEVGICGFRRLDPSSVKDAGFDRHITIFSPEGRLYQVEYAFKAISQGGLTSVGLKGTDTAVVATQKKIPDKLIDPSTVTHIFRLSDKIGCVMTGMIADSKSQVQRARYEAAHWKHQYGYEVPADALCRRIADISQVYTQNAEMRPLGCSMVLIGYDSEGPCVFKTDPAGYYCGYRAVSVGAKQTEANSYLEKKLKKKEAIQLAISCLSAVLSVDFKPSEIEVGVVSKSNPSFKILSEQEMTSKAELACVYSALILVDDDVAVTGEKIQTILKAAGVDVEPYWPGLFAKALEGVSVKDLI-----SKISRDTLYECVNAVLNNAKQRKFVETVEIQVGLKNYDPQKDKRFSGTVKLKHIPRPKMQVCILGDQQHCDEAKANNVPFMDVEALKKLNKNKKLVKKLTKKYDAFLASEALIKQIPRLLGPGLNKAGKFPGLLSHQEGMKIDEVKATIKFQMKKVLCLSVAVGHVGMSEDE---------------------------------------MPPKFDPSEVKVVYLRCVGGEVGATSSLAPKIGPLGLSPKKVGDDIAKATSDWKGLKITVKLTIQNRQAAISVCPSAASLIIKSLKEPPRDRKKQKNIKHSGNLSFDEVVSIAKTMRRSMSRKLEGTVKEILGTCQSVGCTVEGKPPHDVIEQINAGEIEVPMGAYKYIQELYRKKQSDVLKFLLRVRCWQYRQLTKMHRAPRPSRPDKARRLGYRAKQGYVIYRIRVRRGGRKRPVPKGITYGKPKSHGVNELKPTRNLQSIAEERVGRRCAGLRVLNSYWVAQDSTYKYFEVILVDPSHKAIRRDPKANWICKPVMKHRELRGLTSAGRKSRGLGKGHRYSQTTGGSRYASWLRKNSLQLRRKRMGRYSHEPDNATKSCKARGSNLRVHFKNTRETAMALRRMPLRRAMRFLKNVGEHKECVPFRRFNGGVGRCAQAKQWGTQGRWPKKSAEFLLQLLKNAESNADYKGLDVDRLVIDHIQVNRAPCLRRRTYRAHGRINPYMSSPCHIEVVLTEKEMKIGLCSYSGYKIYPGHGKTMVKCDGKTFTFLNAKCESSHLMKRNPRKVTWTVLYRRKHKKGQEEEQTKKRTRRTQKFHRAIVGASLTDIMAKRNMKPEIRKAQREQAIR---------------------------------MDAYNIVKYPLTTEAAMKKIEDNNTLVFIVHVRSNKHHIRAAVKKLYDIDVAKVNTLIRPDGKKKAYVRLAHDYDALDVANKIGIISHRKFSAPRHGSMGFYPKKRSQRHRGKVKAFPKDDPSKPVHLTAFIGYKAGMTHVVREADRPGSKVNKKEIVEAVTILETPPMVIVGVVGYIETPHGLRALQTVWAEHLSEDCRRRFYKNYKSKKKAFTKASKKWQDDLGKKSIERDLKKMERYCKVIRVIAHTQMKLLKQRQKKAHIMEIQLNGGTVADKVKWAREHLEKQIPVNNVFAQDEMIDVIGVTKGHGYKGVTSRWHTKKLPRKTHKGLRKVACIGAWHPSRVSFTVARAGQKGYHHRTEMNKKIYRIGQGKVVKNNASTEYDLTEKSITPMGGFPHYGEVNNDFIMLKGCCMGPKKRVITLRKSLLVHTKRKALEKINLKFIDTSSKF-----------KSAINEVVTREYTINLHKRLHGIGFKKRAPRAIKEIRKFALKQMGTPDVRVDTRLNKQVWSKGIRNVPFRIRVRLSRRRNDDEDSPNKLYTLVTFVPVPTFKGLQTENVDIVKKRTKHFIRHQSDRYKKLKRSWRKPKGIDNRVRRKFKGQYLMPSIGYGSNRKTKHMLPTGFRKVLVHNVRELEVLMMQNRKFCAEIAHAVSSKKRKSIVERAQQLSIRVTNGNARLRSEENDRGHRTTRPARLKGKHTKFVRDLIREVCGHAPYEKRAMELLKVSKDKRALKFLKRRLGTHIRAKRKREELGNILTQMRKMTKGTSSFGKRRNKTHTLCRRCGRSSYHIQKSQCAQCGYPSRKLRSYNWSVKAKRRKTTGTGRMRTLKIVRRRFRNGFREGXXXXXXXXXXXXXXXXXXXXXXXXXXXXXXXXXXXXXXXXXXXXXXXXXXXDKVTWKTNYFTKLVQLLDDYPKCFIVGADNVGSRQMQQIRMSLRGTAVVHMGKNTMMRKAIRGHLERNPALEKLLPHIKGNVGFVFTRGDLVEVRDKLLENKVRAPARNGAIAPCAVVIPAQNTGLGPEKTSFFQALSIPTKISKGTIEIINDVHILKEGDKVGASDATLLNMLNISPFSYGLLVEMVYDSGTIFEPAILDIKPEDLRVKFMEGVRRLAAVCLSISYPTIASAPHSIINGFKNLLAVAAATEFKEAETVKEYLKDPSKFVDPFTRKDWFDVKAPSMFTTRQIGKTLVNRTQGTKIASEGLKFRVFEVSLTDLQNDERSFRKFRLIAEDVQGRNVLTNFHGMDLTTDKLRSMVKKWQTLIEAHVDVKTTDGFLLRVFCIGFTNKSPRKTCYAQHTQVRAIRKKMVEIITRDISGSDLKEVVNKLVPDSIAKDIEKHCQGIYPLHDVFIRKVKVLKKPRFELLKLLELHG------------MLMPKKNRIAIYEYLFKEGVMVAKKDFHAPKHIPNLQVIKTMQSLKSRGFVNEQFAWRHFYWYLTNEGIGYLRNYLHLPPEIVPSTLKERSFQKQPTIFLNRKKSLRYTRNIGLGFKTPREAIEGTYIDKKCPFTGNVSIRGRILTGVVQKMKMQRTIVIRRDYLHYIRKYNRFEKRHRNMSVHLSPCFRDVEIGDVVTVGECRPLSKTVRFNVLKVSKHRIRITLTSRNVRSLEKVCADLINNAKK--LKVKGPVRMPTKTLRITTRKSPCGEGSKTWDRFQMRIHKRVVDLFSPSEVVKQITSISIEPGVEVEVTIAD-----------------MVVDVLHPGQPSVKKTDIREKLGKMYKVTPDTVFVFGFRTAFGGGKSTGFALIYDTLDFAKKFEPKYRLQRHGLYERKQRKERKNRMKKVRGTKKVRDKLNNQVLFDEATYDKLLKDIPVVKLITPSIVSERLKVRGSLARRAIAELLQKGLIKQVVKHHAQVIYTRTTRGPKKHLKRLNAPKAWMLDKLGGVYAPRPSTGPHKLRESLPLVIFLRNRLKYALTNSEVKKIVMQRLIKVDGQVRTDPNYPAGFMDIITIEKTGEFFRLIYDVKGRFTIHRITAEEAKYKLCKVKKVQTGPKGIPFLVTHDGRTIRYPDPVIKVNDTIQLDIATSKIMDSIRFDSGNLCMITGGRNLGRVGTVINRERHPGSFDIVHVKDSQGHQFATRLNNVFIIGKATKPYVSLPRGKGVKLSIAEERDKR-------------------------------MGAEVEADSLGDEWKGYIVRITGGNDKQGFPMKQGILTNGRVRLLLKKGQSCYRPRRDGERKRKSVRGCIVDSNLSVLSLVIARKGEQEIPGLTDKSIPRRLGPKRASKIRKLFNLSKEDDVRQYIVKRPLPLKEGKRYKAPKIQRLITP-------DGFETSISQALLDLEMNSDMRAQLRELYITKAKEKKSIIIYVPTPQLKHFRKIQMRLVRELEKKFSGKHVVFIGERVILPKPTRKNKQKRPRSRTLTAVYDAILEDLVFPAEIVGKRIRIKLDGSQLIKVHLDKNQQTNIEHKVETFTSVYKKLTGREVTFEFMGISRDHWHKRRATGGKRKPLRKKRKFELGRPAANTKLGPRRIHTVRTRGGNKKYRALRLDQGNFAWGSEGCARKTRIIDVVYNASNNELVRTKTLVKNAIVVIDAIPFRQWYESHYALPLGRKKGVKLKRSKKVEKKYKARQRLAKVEPALEEQFQAGRVLACIASRPGQCGRADGYILEGKELEFYVRKTKAKKLCDMVCDLLLEESNIQPVSTPVTVCGDIHGQFYDLEELFRNGGPVPDTNYIFMGDFVDRGYYSLETFTRLLTLKAKWSDRITLLRGNHESRQITQVYGFYDECQSKYGNPNAWRYCCRVFDLLTIAALIDEQVLCVHGGLSPDIRMLDQIRSIERNQEIPHKGAFCDLVWSDPEVETWAASPRGAGWLFGAKVTHEFMHLNSLKLICRAHQLVHEGYKYMFDEKLVTVWSAPNYCYRCGNIAGKLVSVIGDEDTCVGFLLGGVGEVNKSRHANFLVVDKNTSVSEIEECFKRFVKRDDIDIILINQNIAEMIRHVIDSHPVPAVLEIPSKDHPYDASKDSILRRARGMFNPEDDSHIRVWVFLPIVVITFLVGVLRHYVSILLASQKDSQVMIRARMLRENGKYLPKQSFLMRRHFFNNEETGYFKTQNPMTDPSMMTDMLKGNITNVIPMIMIGGWINLMFSGFVTTKVPFPLTLRFKPMLQRGIELAALDAAWVSSASWYFLNVFGLRSIYTLVLGENNAADQARHLQDQMSGAAMAMPPDPMGERYNIHSQLEHLQSKYIGTGHADTTKFEWLVNQHRDSYASYLGHCDLLNFFAITENEAKARVRFNLMEKMLQPCGPPPEKPEDLVLVLGDLHIPHRCSSLPSKFKKLLVPGRIQHILCTGNLCTKESYDYLKTLASDVHVVRGDFDENYPEQKVVTVGQFRIGLSHGHQVVPWGDPESLALIQRQLDVDIFISGHTHKFEAYEHENKFYINPGSATGAYNPLPSFVLMDIQSSTVVTYVYQLVGDEVKVERIEYKKPAGDAEKGKKIFVQRCAQCHTVEAGGKHKTGPNLHGLFGRKTGQAAGFTYTDANKSKGITWNEDTLFEYLENPKKYIPGTKMIFAGLKKPQERGDLIAYLKVSTMENDSGEVVDLYCPRKCSASNRIIHAKDHASVQINIATETSKMYAICGAIRRMGESDDCINRLAKKDGLFAKNDPFADANKQDGLVHIRIQQRNGRKTLTTVQGLSAEYDLKKIVRACKKEFACNGTVIEHPEYGEVLQLQGDQRENICQWLTKAGLAKAEQLKVHGFFEARLVQSSILKKVLEAIKELLNEATFDCSDSGIQLQAMDNSHVSLVSLNMRSDGFDKYRCDRNLSMGMNLASMTKILKCAGNDDVVTIKAQDDTVTFVFESQNQEKVSDYEMKLMNLDQEHLGIPETDYSCVVRLPSTEFARICRDLGQFGESCVISCSKEGVKFSSAGDIGTANIKLAQTSNVDKEDEAVTIEMQEPVTLTFACHYLTLFTRATSLSPVVQLSMTAEAPLVVEYKIAEMGYIRYYLAPKIGYVFAVSGPVVTAERMAGSAMYELVRVGYYELVGEIIRLEGDMATIQVYEETSGVTVGDPVLRTGKPLSVELGPGILGSIFDGIQRPLKDINELTESIYIPKGVNVPCLSRTVQWEFKIGAHITGGDMYGIVNENTLVKHKMLLPPRAKGTVTYIAEPGNYTVDDIVLETEFDGERSKYTMLQVWPVRQPRPCTEKLPANHPLLTGQRVLDSLFPCVQGGTTAIPGAFGCGKTVISQSLSKYSNSDVIVYVGCGERGNEMSEVLRDFPELSVEIEGVTESIMKRTALVANTSNMPVAAREASIYTGITLSEYFRDMGYNVSMMADSTSRWAEALREISGRLAEMPADSGYPAYLGARLASFYERAGRVKCLGNPDREGSVSIVGAVSPPGGDFSDPVTSATLGIVQVFWGLDKKLAQRKHFPSINWLISYSKYMRALDDFYDKNFSEFVPLRTKVKEILQEEEDLSEIVQLVGKASLAETDKITLEVAKLLKDDFLQQNSYSPYDRFCPFYKTVGMLKNIIAFYDMSRHAVETTAQSNKITWNVIRDSMGNILYQLSSMKFKDPVKDGEAKIKADFEQLHEDIQSAFRNLEDFPSRGAMMLMKARLKGAQKGHSLLKKKADALQMRFRLILGKIIETKTLMGEVMKEAAFSLAEAKFTTGDFNQVVLQNVNRAQVKIRTKRDNVAGVTLPVFESYQDGDTYELAGLARGGQQLAKLKKNYQSAVKLLVELASLQTSFVTLDEVIKITNRRVNAIEHVIIPRIERTLAYIISELDELEREEFYRLKKIQDK-------------------------------------MAKKLRGLKAKMFNKQRRNEKIQMKKKIRAHEERQVKAVPVYLLDRDQSRAKVLSNMIKQKRKEKAGKWDVPIPKVRAQADAEVFKVLRSGKTRRKAWKRMVTKVTFVGEGFTRKPPKFERFIRPMALRFKKAHVSHPELKATFCLPIIGVKRNPSSPMYTTLGVITKGTVIEVNISELGMVTQSGKVVWGKYAQVTNNPENDGCINAVLL
Echinoderes_sp                 XXXXXXXXXXXXXXXXXXXXXXXXXXXXXXXXXXXXXXXXXXXXXXXXXXXXXXXXXXXXXXXXXXXXXXXXXXXXXXXXXXXXXXXXXXXXXXXXXXXXXXXXXXXXXXXXXXXXXXXXXXXXXXXXXXXXXXXXXXXXXXXXXXXXXXXXXXXXXXXXXXXXXXXXXXXXXXXXXXXXXXXXXXXXXXXXXXXXXXXXXXXXXXXXXXXXXXXXXXXXXXXXXXXXXXXXXXXXXXXXXXXXXXXXXXXXXXXXXXXXXXXXXXXXXXXXXXXXXXXXXXXXXXXXXXXXXXXXXXXXXXXXXXXXXXXXXXXXXXXXXXXXXXXXXXXXXXXXXXXXXXXXXXXXXXXXXXXXXXXXXXXXXXXXXXXXXXXXXXXXXXXXXXXXXXXXXXXXXXXXXXXXXXXXXXXXXXXXXXXXXXXXXXXXXXXXXXXXXXXXXXXXXXXXXXXXXXXXXXXXXXXXXXXXXXXXXXXXXXXXXXXXXXXXXXXXXXXXXXXXXXXXXXXXXXXXXXXXXXXXXXXXXXXXXXXXXXXXXXXXXXXXXXXXXXXXXXXXXXXXXXXXXXXXXXXXXXXXXXXXXXXXXXXXXXXXXXXXXXXXXXXXXXXXXXXXXXXXXXXXXXXXXXXXXXXXXXXXXXXXXXXXXXXXXXXXXXXXXXXXXXXXXXXXXXXXXXXXXXXXXXXXXXXXXXXXXXXXXXXXXXXXXXXXXXXXXXXXXXXXXXXXXXXXXXXXXXXXXXXXXXXXXXXXXXXXXXXXXXXXXXXXXXXXXXXXXXXXXXXXXXXXXXXXXXXXXXXXXXXXXXXXXXXXXXXXXXXXXXXXXXXXXXXXXXXXXXXXXXXXXXXXXXXXXXXXXXXXXXXXXXXXXXXXXXXXXXXXXXXXXXXXXXXXXXXXXXXXXXXXXXXXXXXXXXXXXXXXXXXXXXXXXXXXXXXXXXXXXXXXXXXXXXXXXXXXXXXXXXXXXXXXXXXXXXXXXXXXXXXXXXXXXXXXXXXXXXXXXXXXXXXXXXXXXXXXXXXXXXXXXXXXXXXXXXXXXXXXXXXXXXXXXXXXXXXXXXXXXXXXXXXXXXXXXXXXXXXXXXXXXXXXXXXXXXXXXXXXXXXXXXXXXXXXXXXXXXXXXXXXXXXXXXXXXXXXXXXXXXXXXXXXXXXXXXXXXXXXXXXXXXXXXXXXXXXXXXXXXXXXXXXXXXXXXXXXXXXXXXXXXXXXXXXXXXXXXXXXXXXXXXXXXXXXXXXXXXXXXXXXXXXXXXXXXXXXXXXXXXXXXXXXXXXXXXXXXXXXXXXXXXXXXXXXXXXXXXXXXXXXXXXXXXXXXXXXXXXXXXXXXXXXXXXXXXXXXXXXXXXXXXXXXXXXXXXXXXXXXXXXXXXXXXXXXXXXXXXXXXXXXXXXXXXXXXXXXXXXXXXXXXXXXXXXXXXXXXXXXXXXXXXXXXXXXXXXXXXXXXXXXXXXXXXXXXXXXXXXXXXXXXXXXXXXXXXXXXXXXXXXXXXXXXXXXXXXXXXXXXXXXXXXXXXXXXXXXXXXXXXXXXXXXXXX-------------------------------------------------------------------------------------------------------------------------------------------------------------------------------------------------------------------------------------------------------------------------------------------------------------------------------------VFQARGKKEDVQRRVDQIRDEIQETTSEYEKEKLQERLAKLANGVAVLK-------------------------------------------------------------------------------------------------------------------------------------------XXXXXXXXXXXXXXXXXXXXXXXXXXXXXXXXXXXXXXXXXXXXXXXXXXXXXXXXXXXXXXXXXXXXXXXXXXXXXXXXXXXXXXXXXXXXXXXXXXXXXXXXXXXXXXXXXXXXXXXXXXXXXXXXXXXXXXXXXXXXXXXXXXXXXXXXXXXXXXXXXXXXXXXXXXXXXXXXXXXXXXXXXXXXXXXXXXXXXXXXXXXXXXXXXXXXXXXXXXXXXXXXXXXXXXXXXXXXXXXXXXXXXXXXXXXXXXXXXXXXXXXXXXXXXXXXXXXXXXXXXXXXXXXXXXXXXXXXXXXXXXXXXXXXXXXXXXXXXXXXXXXXXXXXXXXXXXXXXXXXXXXXXXXXXXXXXXXXXXXXXXXXXXXXXXXXXXXXXXXXXXXXXXXXXXXXXXXXXXXXXXXXXXXXXXXXXXXXXXXXXXXXXXXXXXXXXXXXXXXXXXXXXXXXXXXXXXXXXXXXXXXXXXXXXXXXXXXXXXXXXXXXXXXXXXXXXXXXXXXXXXXXXXXXXXXXXXXXXXXXXXXXXXXXXXXXXXXXXXXXXXXXXXXXXXXXXXXXXXXXXXXXXXXXXXXXXXXXXXXXXXXXXXXXXXXXXXXXXXXXXXXXXXXXXXXXXXXXXXXXXXXXXXXXXXXXXXXXXXXXXXXXXXXXXXXXXXXXXXXXXXXXXXXXXXXXXXXXXXXXXXXXXXXXXXXXXXXXXXXXXXXXXXXXXXXXXXXXXXXXXXXXXXXXXXXXXXXXXXXXXXXXXXXXXXXXXXXXXXXXXXXXXXXXXXXXXXXXXXXXXXXXXXX------------------------------------------------------------------------------------------------------------------VDCTKGV-------------------QYLNEIKDSVV-------------------------------------------AGF-----QWA----------------KLMRKLWGDNFYSPTAKKWRAFCIFVLDPIYKFDA--------------------------------------------------------------------------------------------------------------------------------------------------------------------------------------------------------------------------------------------------------------------------------------------------------------------------------ARYLGEKYDYDVTEARKIWTFGPEGTGPNLLVDCTKGVQYLNEIKDSVVAGFQWATKE--------------------------------------------------------------------------------------------------------------------------------------------------------------------XXXXXXXXXXXXXXXXXXXXXXXXXXXXXXXXXXXXXXXXXXXXXXXXXXXXXXXXXXXXXXXXXXXXXXXXXXXXXXXXXXXXXXXXXXXXXXXXXXXXXXXXXXXXXXXXXXXXXXXXXXXXXXXXXXXXXXXXXXXXXXXXXXXXXXXXXXXXXXXXXXXXXXXXXXXXXXXXXXXXXXXXXXXXXXXXXXXXXXXXXXXXXXXXXXXXXXXXXXXXXXXXXXXXXXXXXXXXXXXXXXXXXXXXXXXXXXXXXXXXXXXXXXXXXXXXXXXXXXXXXXXXXXXXXXXXXXXXXXXXXXXXXXXXXXXXXXXXXXXXXXXXXXXXXXXXXXXXXXXXXXXXXXXXXXXXXXXXXXXXXXXXXXXXXXXXXXXXXXXXXXXXXXXXXXXXXXXXXXXXXXXXXXXXXXXXXXXXXXXXXXXXXXXXXXXXXXXXXXXXXXXXXXXXXXXXXXXXXXXXXXXXXXXXXXXXXXXXXXXXXXXXXXXXXXXXXXXXXXXXXXXXXXXXXXXXXXXXXXXXXXXXXXXXXXXXXXXXXXXXXXXXXXXXXXXXXXXXXXXXXXXXXXXXXXXXXXXXXXXXXXXXXXXXXXXXXXXXXXXXXXXXXXXXXXXXXXXXXXXXXXXXXXXXXXXXXXXXXXXXXXXXXXXXXXXXXXXXXXXXXXXXXXXXXXXXXXXXXXXXXXXXXXXXXXXXXXXXXXXXXXXXXXXXXXXXXXXXXXXXXXXXXXXXXXXXXXXXXXXXXXXXXXXXXXXXXXXXXXXXXXXXXXXXXXXXXXXXXXXXXXXXXXXXXXXXXXXXXXXXXXXXXXXXXXXXXXXXXXXXXXXXXXXXXXXXXXXXXXXXXXXXXXXXXXXXXXXXXXXXXXXXXXXXXXXXXXXXXXXXXXXXXXXXXXXXXXXXXXXXXXXXXXXXXXXXXXXXXXXXXXXXXXXXXXXXXXXXXXXXXXXXXXXXXXXXXXXXXXXXXXXXXXXXXXXXXXXXXXXXXXXXXXXXXXXXXXXXXXXXXXXXXXXXXXXXXXXXXXXXXXXXXXXXXXXXXXXXXXXXXXXXXXXXXXXXXXXXXXXXXXXXXXXXXXXXXXXXXXXXXXXXXXXXXXXXXXXXXXXXXXXXXXXXXXXXXXXXXXXXXXXXXXXXXXXXXXXXXXXXXXXXXXXXXXXXXXXXXXXXXXXXXXXXXXXXXXXXXXXXXXXXXXXXXXXXXXXXXXXXXXXXXXXXXXXXXXXXXXXXXXXXXXXXXXXXXXXXXXXXXXXXXXXXXXXXXXXXXXXXXXXXXXXXXXXXXXXXXXXXXXXXXXXXXXXXXXXXXXXXXXXXXXXXXXXXXXXXXXXXXXXXXXXXXXXXXXXXXXXXXXXXXXXXXXXXXXXXXXXXXXXXXXXXXXX-----------------------------------------------------------------------------VMEKPSVKWSDVMGLEGAKEALKEAVILPIKFPHLFRGKRTPWRGILLF----------------------------------------RLVKNLFEMAREHKPSIIFIDEVDSLCSSRSDSESESARRIKTEFLVQMQG---------------------------------------------------------------FSGADITIVVRDALMQPVRKVQTATHFKRVR------------------------------------------------------------------------------XXXXXXXXXXXXXXXXXXXXXXXXXXXXXXXXXXXXXXXXXXXXXXXXXXXXXXXXXXXXXXXXXXXXXXXXXXXXXXXXXXXXXXXXXXXXXXXXXXXXXXXXXXXXXXXXXXXXXXXXXXXXXXXXXXXXXXXXXXXXXXXXXXXXXXXXXXXXXXXXXXXXXXXXXXXXXXXXXXXXXXXXXXXXXXXXXXXXXXXXXXXXXXXXXXXXXXXXXXXXXXXXXXXXXXXXXXXXXXXXXXXXXXXXXXXXXXXXXXXXXXXXXXXXXXXXXXXXXXXXXXXXXXXXXXXXXXXXXXXXXXXXXXXXXXXXXXXXXXXXXXXXXXXXXXXXXXXXXXXXXXXXXXXXXXXXXXXXXXXXXXXXXXXXXXXXXXXXXXXXXXXXXXXXXXXXXXXXXXXXXXXXXXXXXXXXXXXXXXXXXXXXXXXXXXXXXXXXXXXXXXXXXXXXXXXXXXXXXXXXXXXXXXXXXXXXXXXXXXXXXXXXXXXXXXXXXXXXXXXXXXXXXXXXXXXXXXXXXXXXXXXXXXXXXXXXXXXXXXXXXXXXXXXXXXXXXXXXXXXXXXXXXXXXXXXXXXXXXXXXXXXXXXXXXXXXXXXXXXXXXXXXXXXXXXXXXXXXXXXXXXXXXXXXXXXXXXXXXXXXXXXXXXXXXXXXXXXXXXXXXXXXXXXXXXXXXXXXXXXXXXXXXXXXXXXXXXXXXXXXXXXXXXXXXXXXXXXXXXXXXXXXXXXXXXXXXXXXXXXXXXXXXXXXXXXXXXXXXXXXXXXXXXXXXXXXXXXXXXXXXXXXXXXXXXXXXXXXXXXXXXXXXXXXXXXXXXXXXXXXXXXXXXXXXXXXXXXXXXXXXXXXXXXXXXXXXXXXXXXXXXXXXXXXXXXXXXXXXXXXXXXXXXXXXXXXXXXXXXXXXXXXXXXXXXXXXXXXXXXXXXXXXXXXXXXXXXXXXXXXXXXXXXXXXXXXXXXXXXXXXXXXXXXXXXXXXXXXXXXXXXXXXXXXXXXXXXXXXXXXXXXXXXXXXXXXXXXXXXXXXXXXXXXXXXXXXXXXXXXXXXXXXXXXXXXXXXXXXXXXXXXXXXXXXXXXXXXXXXXXXXXXXXXXXXXXXXXXXXXXXXXXXXXXXXXXXXXXXXXXXXXXXXXXXXXXXXXXXXXXXXXXXXXXXXXXXXXXXXXXXXXXXXXXXXXXXXXXXXXXXXXXXXXXXXXXXXXXXXXXXXXXXXXXXXXXXXXXXXXXXXXXXXXXXXXXXXXXXXXXXXXXXXXXXXXXXXXXXXXXXXXXXXXXXXXXXXXXXXXXXXXXXXXXXXXXXXXXXXXXXXXXXXXXXXXXXXXXXXXXXXXXXXXXXXXXXXXXXXXXXXXXXXXXXXXXXXXXXXXXXXXXXXXXXXXXXXXXXXXXXXXXXXXXXXXXXXXXXXXXXXXXXXXXXXXXXXXXXXXXXXXXXXXXXXXXXXXXXXXXXXXXXXXXXXXXXXXXXXXXXXXXXXXXXXXXXXXXXXXXXXXXXXXXXXXXXXXXXXXXXXXXXXXXXXXXXXXXXXXXXXXXXXXXXXXXXXXXXXXXXXXXXXXXXXXXXXXXXXXXXXXXXXXXXXXXXXXXXXXXXXXXXXXXXXXXXXXXXXXXXXXXXXXXXXXXXXXXXXXXXXXXXXXXXXXXXXXXXXXXXXXXXXXXXXXXXXXXXXXXXXXXXXXXXXXXXXXXXXXXXXXXXXXXXXXXXXXXXXXXXXXXXXXXXXXXXXXXXXXXXXXXXXXXXXXXXXXXXXXXXXXXXXXXXXXXXXXXXXXXXXXXXXXXXXXXXXXXXXXXXXXXXXXXXXXXXXXXXXXXXXXXXXXXXXXXXXXXXXXXXXXXXXXXXXXXXXXXXXXXXXXXXXXXXXXXXXXXXXXXXXXXXXXXXXXXXXXXXXXXXXXXXXXXXXXXXXXXXXXXXXXXXXXXXXXXXXXXXXXXXXXXXXXXXXXXXXXXXXXXXXXXXXXXXXXXXXXXXXXXXXXXXXXXXXXXXXXXXXXXXXXXXXXXXXXXXXXXXXXXXXXXXXXXXXXXXXXXXXXXXXXXXXXXXXXXXXXXXXXXXXXXXXXXXXXXXXXXXXXXXXXXXXXXXXXXXXXXXXXXXXXXXXXXXXXXXXXXXXXXXXXXXXXXXXXXXXXXXXXXXXXXXXXXXXXXXXXXXXXXXXXXXXXXXXXXXXXXXXXXXXXXXXXXXXXXXXXXXXXXXXXXXXXXXXXXXXXXXXXXXXXXXXXXXXXXXXXXXXXXXXXXXXXXXXXXXXXXXXXXXXXXXXXXXXXXXXXXXXXXXXXXXXXXXXXXXXXXXXXXXXXXXXXXXXXXXXXXXX--------------------------------RMDQYAIVRYPLTTESAMKKIEDNNTLVFIVNKKANKPQIKHAVKKLYDIDVFKVNTLIR-----YCWCK-----------------XXXXXXXXXXXXXXXXXXXXXXXXXXXXXXXXXXXXXXXXXXXXXXXXXXXXXXXXXXXXXXXXXXXXXXXXXXXXXXXXXXXXXXXXXXXXXXXXXXXXXXXXXXXXXXXXXXXXXXXXXXXXXXXXXXXXXXXXXXXXXXXXXXXXXXXXXXXXXXXXXXXXXXXXXXXXXXXXXXXXXXXXXXXXXXXXXXXXXXXXXXXXXXXXXXXXXXXXXXXXXXXXXXXXXXXXXXXXXXXXXXXXXXXXXXXXXXXXXXXXXXXXXXXXXXXXXXXXXXXXXXXXXXXXXXXXXXXXXXXXXXXXXXXXXXXXXXXXXXXXXXXXXXXXXXXXXXXXXXXXXXXXXXXXXXXXXXXXXXXXXXXXXXXXXXXXXXXXXKSTMSEVVTREYTVHLHKRLHGVGFKRKAPRAIKEL--------------------------------------------------------------------------XXXXXXXXXXXXXXXXXXXXXXXXXXXXXXXXXXXXXXXXXXXXXXXXXXXXXXXXXXXXXXXXXXXXXXXXXXXXXXXXXXXXXXXXXXXXXXXXXXXXXXXXXXXXXXXXXXXXXXXXXXXXXXXXXXXXXXXXXXXXXXXXXXXXXXXXXXXXXXXXXXXXXXXXXXXXXXXXXXXXXXXXXXXXXXXXXXXXXXXXXXXXXXXXXXXXXXXXXXXXXXXXXXXXXXXXXXXXXXXXXXXXXXXXXXXXXXXXXXXXXXXXXXXXXXXXXXXXXXXXXXXXXXXXXXXXXXXXXXXXXXXXXXXXXXXXXXXXXXXXXXXXXXXXXXXXXX-------------------------------------------------------------------------------------------------------------------------------------------------------------------GASEAALLQMLKIYPFSYGLVIEKVYDSGTVFDPSILDITDDDLRAKFMQ--------------------------------------------------------XXXXXXXXXXXXXXXXXXXXXXXXXXXXXXXXXXXXXXXXXXXXXXXXXXXXXXXXXXXXXXXXXXXXXXXXXXXXXXXXXXXXXXXXXXXXXXXXXXXXXXXXXXXXXXXXXXXXXXXXXXXXXXXXXXXXXXXXXXXXXXXXXXXXXXXXXXXXXXXXXXXXXXXXXXXXXXXXXXXXXXXXXXXXXXXXXXXXXXXXXXXXXXXXXXXXXXXXXXXXXXXXXXXXXXXXXXXXXXXXXXXXXXXXXXXXXXXXXXXXXXXXXXXXXXXXXXXXXXXXXXXXXXXXXXXXXXXXXXXXXXXXXXXXXXXXXXXXXXXXXXXXXXXXXXXXXXXXXXXXXXXXXXXXXXXXXXXXXXXXXXXXXXXXXXXXXXXXXXXXXXXXXXXXXXXXXXXXXXXXXXXXXXXXXXXXXXXXXXXXXXXXXXXXXXXXXXXXXXXXXXXXXXXXXXXXXXXXXXXXXXXXXXXXXXXXXXXXXXXXXXXXXXXXXXXXXXXXXXXXXXXXXXXXXXXXXXXXXXXXXXXXXXXXXXXXXXXXXXXXXXXXXXXXXXXXXXXXXXXXXXXXXXXXXXXXXXXXXXXXXXXXXXXXXXXXXXXXXXXXXXXXXXXXXXXXXXXXXXXXXXXXXXXXXXXXXXXXXXXXXXXXXXXXXXXXXXXXXXXXXXXXXXXXXXXXXXXXXXXXXXXXXXXXXXXXXXXXXXXXXXXXXXXXXXXXXXXXXXXXXXXXXXXXXXXXXXXXXXXXXXXXXXXXXXXXXXXXXXXXXXXXXXXXXXXXXXXXXXXXXXXXXXXXXXXXXXXXXXXXXXXXXXXXXXXXXXXXXXXXXXXXXXXXXXXXXXXXXXXXXXXXXXXXXXXXXXXXXXXXXXXXXXXXXXXXXXXXXXXXXXXXXXXXXXXXXXXXXXXXXXXXXXXXXXXXXXXXXXXXXXXXXXXXXXXXXXXXXXXXXXXXXXXXXXXXXXXXXXXXXXXXXXXXXXXXXXXXXXXXXXXXXXXXXXXXXXXXXXXXXXXXXXXXXXXXXXXXXXXXXXXXXXXXXXXXXXXXXXXXXXXXXXXXXXXXXXXXXXXXXXXXXXXXXXXXXXXXXXXXXXXXXXXXXXXXXXXXXXXXXXXXXXXXXXXXXXXXXXXXXXXXXXXXXXXXXXXXXXXXXXXXXXXXXXXXXXXXXXXXXXXXXXXXXXXXXXXXXXXXXXXXXXXXXXXXXXXXXXXXXXXXXXXXXXXXXXXXXXXXXXXXXXXXXXXXXXXXXXXXXXXXXXXXXXXXXXXXXXXXXXXXXXXXXXXXXXXXXXXXXXXXXXXXXXXXXXXXXXXXXXXXXXXXXXXXXXXXXXXXXXXXXXXXXXXXXXXXXXXXXXXXXXXXXXXXXXXXXXXXXXXXXXXXXXXXXXXXXXXXXXXXXXXXXXXXXXXXXXXXXXXXXXXXXXXXXXXXXXXXXXXXXXXXXXXXXXXXXXXXXXXXXXXXXXXXXXXXXXXXXXXXXXXXXXXXXXXXXXXXXXXXXXXXXXXXXXXXXXXXXXXXXXXXXXXXXXXXXXXXXXXXXXXXXXXXXXXXXXXXXXXXXXXXXXXXXXXXXXXXXXXXXXXXXXXXXXXXXXXXXXXXXXXXXXXXXXXXXXXXXXXXXXXXXXXXXXXXXXXXXXXXXXXXXXXXXXXXXXXXXXXXXXXXXXXXXXXXXXXXXXXXXXXXXXXXXXXXXXXXXXXXXXXXXXXXXXXXXXXXXXXXXXXXXXXXXXXXXXXXXXXXXXXXXXXXXXXXXXXXXXXXXXXXXXXXXXXXXXXXXXXXXXXXXXXXXXXXXXXXXXXXXXXXXXXXXXXXXXXXXXXXXXXXXXXXXXXXXXXXXXXXXXXXXXXXXXXXXXXXXXXXXXXXXXXXXXXXXXXXXXXXXXXXXXXXXXXXXXXX----------------------------------------RSRILRENGRFIPKQSFHMRKHFFNDEERGFFKTQNPMT----------------------------------------------------------------------------------------------------------------XXXXXXXXXXXXXXXXXXXXXXXXXXXXXXXXXXXXXXXXXXXXXXXXXXXXXXXXXXXXXXXXXXXXXXXXXXXXXXXXXXXXXXXXXXXXXXXXXXXXXXXXXXXXXXXXXXXXXXXXXXXXXXXXXXXXXXXXXXXXXXXXXXXXXXXXXXXXXXXXXXXXXXXXXXXXXXXXXXXXXXXXXXXXXXXXXXXXXXXXXXXXXXXXXXXXXXXXXXXXXXXXXXXXXXXXXXXXXXXXXXXXXXXXXXXXXXXXXXXXXXXXXXXXXXXXXXXXXXXXXXXXXXXXXXXXXXXXXXXXXXXXXXXXXXXXXXXXXXXXXXXXXXXXXXXXXXXXXXXXXXXXXXXXXXXXXXXXXXXXXXXXXXXXXXXXXXXXXXXXXXXXXXXXXXXXXXXXXXXXXXXXXXXXXXXXXXXXXXXXXXXXXXXXXXXXXXXXXXXXXXXXXXXXXXXXXXXXXXXXXXXXXXXXXXXXXXXXXXXXXXXXXXXXXXXXXXXXXXXXXXXXXXXXXXXXXXXXXXXXXXXXXXXXXXXXXXXXXXXXXXXXXXXXXXXXXXXXXXXXXXXXXXXXXXXXXXXXXXXXXXXXXXXXXXXXXXXXXXXXXXXXXXXXXXXXXXXXXXXXXXXXXXXXXXXXXXXXXXXXXXXXXXXXXXXXXXXXXXXXXXXXXXXXXXXXXXXXXXXXXXXXXXXXXXXXXXXXXXXXXXXXXXXXXXXXXXXXXXXXXXXXXXXXXXXXXXXXXXXXXXXXXXXXXXXXXXXXXXXXXXXXXXXXXXXXXXXXXXXXXXXXXXXXXXXXXXXXXXXXXXXXXXXXXXXXXXXXXXXXXXXXXXXXXXXXXXXXXXXXXXXXXXXXXXXXXXXXXXXXXXXXXXXXXXXXXXXXXXXXXXXXXXXXXXXXXXXXXXXXXXXXXXXXXXXXXXXXXXXXXXXXXXXXXXXXXXXXXXXXXXXXXXXXXXXXXXXXXXXXXXXXXXXXXXXXXXXXXXXXXXXXXXXXXXXXXXXXXXXXXXXXXXXXXXXXXXXXXXXXXXXXXXXXXXXXXXXXXXXXXXXXXXXXXXXXXXXXXXXXXXXXXXXXXXXXXXXXXXXXXXXXXXXXXXXXXXXXXXXXXXXXXXXXXXXXXXXXXXXXXXXXXXXXXXXXXXXXXXXXXXXXXXXXXXXXXXXXXXXXXXXXXXXXXXXXXXXXXXXXXXXXXXXXXXXXXXXXXXXXXXXXXXXXXXXXXXXXXXXXXXXXXXXXXXXXXXXXXXXXXXXXXXXXXXXXXXXXXXXXXXXXXXXXXXXXXXXXXXXXXXXXXXXXXXXXXXXXXXXXXXXXXXXXXXXXXXXXXXXXXXXXXXXXXXXXXXXXXXXXXXXXXXXXXXXXXXXXXXXXXXXXXXXXXXXXXXXXXXXXXXXXXXXXXXXXXXXXXXXXXXXXXXXXXXXXXXXXXXXXXXXXXXXXXXXXXXXXXXXXXXXXXXXXXXXXXXXXXXXXXXXXXXXXXXXXXXXXXXXXXXXXXXXXXXXXXXXXXXXXXXXXXXXXXXXXXXXXXXXXXXXXXXXXXXXXXXXXXXXXXXXXXXXXXXXXXXXXXXXXXXXXXXXXXXXXXXXXXXXXXXXXXXXXXXXXXXXXXXXXXXXXXXXXXXXXXXXXXXXXXXXXXXXXXXXXXXXXXXXXXXXXXXXXXXXXXXXXXXXXXXXXXXXXXXXXXXXXXXXXXXXXXXXXXXXXXXXXXXXXXXXXXXXXXXXXXXXXXXXXXXXXXXXXXXXXXXXXXXXXXXXXXXXXXXXXXXXXXXXXXXXXXXXXXXXXXXXXXXXXXXXXXXXXXXXXXXXXXXXXXXXXXXXXXXXXXXXXXXXX
Periplaneta_americana          ------------MAACSIANIVKSSLGPVGLDKMLVDDIGDVTVTNDGATILRLLEVEHPAARVLVELAQLQDEEVGDGTTSVVIIAAELLKNADELVKQKIHPTSIISGYRLACKEACKYIQEHLTVSVEELGRDCLVNVAKTSMSSKLIGPDADFFSNMVVDAAQAVKDGKGGFMYPVKAVNILKAHGRSARESVLVAGYALNCTVASQAMPKKIANAKIACLDFSLMKSKMKLGVQVLVTDPEKLEALRQRESDITKERIQKILAAGANVILCTGGIDDLCLKYFVEAGAMAVRRCKKADLKRIAKATGAGFLTSLSNMEGDDAFDASNVGEAAEVVQEVVCDDELILIKRTASSIILRGPNDFYCDEMERSVHDALCVVKRVLESKSVVAGGGSVEAALSIYLENFATSLSSREQLAIAEFARSLLVIPKTLAVNAAQDATDLVAKLRAYHNSSQTHAHFKWVGLDLYEGTVRDNRKAGVLEPAISKIKSLKFATEAAITILRIDDMIRLKSKPADIRSSNINAGKAVADAIRTSLGPRGMDKMIQAGNGEVTITNDGATILKQISVTHPAAKMLVELSKAQDIEAGDGTTSVVVVAGSLLEAAEKLLQRGIHPTIISDAFQRAAAKAVEILMSRPIELGDKESLIKIASTALNSKVVSQQSSLLAPLAVEAVLKNVDLKDIRVIKKLGGTVEDTELVDGLVFTQKGPRRVEKAKIGLIQFCISPPKTDMDHNVIVSDYAAMDRVLKEERAYILNIVKQIKKSGCNVLLVQKSILRDAVSDLAIHFLDKIKVMVVKDIEREDIEFVTKTLGCRPIASLDHFVPEHLATAELVEEGSSKFVKITGIQNPTVTVLVRGSNKLVLEEADRSLHDALCVVRCLVKQRALIAGGGAPETELGLKLAQYAQTITGVDAYCFRAFANALEVIPSTLAENAGLNPIATVTELRNRHAQGDITAGINVRKGAITNILEENVVQPLLVSTSAITLASETVRSILKIDDIFDEYGRPFIIIRDQQNQKRLTGVDALKSHILAGRSIANTLRTSLGPKGLDKMMVNPDGDVTVTNDGATILKLMDVDHEIAKLMVQLSQSQDDEIGDGTTGVVVLAGALLEQAELLLDKGIHPIRIADGFELAAQCAVKHLEKIADSFPVDLVNEPLIQTAMTTLGSKIVNKCHRQMAEIAVQAVLAVADMEKRDVNFELIKVEGKVGGRLEDTMLVKGVVIDKDFSHPQMPKVLKDVKLAILTCPFEPPKPKTKHKLDVTSVEDYKALRQYEADKFSEMVQQVKDAGATLAICQWGFDDEANHLLLQRQLPAVRWVGGPEIELIAIATGGRIVPRFEELSPDKLGHAGLVRELQFGTTKDRMLVIEECKNSRAVTIFIRGGNKMIIEEAKRSIHDALCVVRNLVQDNRVVYGGGAAEIACAIATSQEADKISSLEQYAFRAFSDALESVPLALAENSGLSPIHTLTEVKARQVKENNPALGIDCMLKGTSDMKEQHVIESLHSKKQQIILATQLVKMILKIDDIRAKDVRFGPEVRALMLQGVDILADAVAVTMGPKGRNVILEQSWGSPKITKDGVTVAKGVELKDKFQNIGAKLVQDVANNTNEEAGDGTTTATVLARAIAKEGFEKISKGANPIEIRRGVMMAVEAIKDNLKALSKPVTTPEEIAQVATISANGDGDLISDAMKKVGKEGVITVKDGKTLNDELEIIEGMKFDRGYISPYFINTSKGAKVEFNDCLLLLSEKKISSVQSIIPALELANRKPLVIIAEDVDGEALSTLVVNRLKIGLQVAAVKAPGFGDNRKATLQDMAIATGGIVFGDEANTIKMEDIQLGDFGQVGEIVITKDDTLILRGKGKKSDIDRRAEQLRDQISNTTSEYEKEKLQERLARLASGVAVLKVGGSSEVEVNEKKDRVNDALNATRAAVEEGIVPGGGTALLRCIPGLNNIQTANDDQETGIDIVRKALRMPCMQIAKNAGIDASVVVAKVGYDAMNNEYVNMIEKGIIDPTKVVRTALTDAAGVASLLTTAEAVVTDIPKYNFKKIAVVPPAKDFIDIILSKTQRKTPTVIHKHYKISRIRQFYMRKVKYTQQNFHDRLSQIIQEFPKLDDVHPFYADLMNILYDKDHYKLALGQLNTARHLVDNVAKDYVRLLKFGDSLYRCKQLKRAALGRMATIMKRQSQNLQYLEEVRQHLARLPSIDPYTRTIIICGFPNVGKSSFINKITRADVEVQPYAFTTKALYVGHTDYKYLRWQVIDTPGILDHPLEDRNVIEMQAVTALAHLRAAVLYVMDLSEQCDHSLADQVRLFESIRPLFANKPLLVVLNKSDIVKLEELSGSGVAEVKQEACERLLAYRVEMKVKTKKRLHVATPAPRDRARPPCIPKLERDVEEEMGDDYILDLKKNYYKYDIIPEIWEGHNIADYIDPKEHVNVVFIGHVDAGKSTIGGQIMNLTGMVDKRTLEKYEREAKEKSRETWYLSWALDTNQEEREKGKTVEVGRAYFETERKHFTILDAPGHKSFVPNMIGGAAQADLAVLVISARKGEFETGFDRGGQTREHAMLAKTAGVKHLVVLVNKMDDPTVEWSEARYNECRDKIMPYLRKLGFNPQKDLTFMPCSGLTGLGLCPWYRGDAFIPFIDLPSLNRKMGGPFVMPVVDKYKDMGMVVMGKVEAGEAKKGQSLLLMPNRTVVLVDQMWSDDEEVTAVGPGENVKIKLKGIEEDDVSPGFVLCDNANPIKTGRVFDAQVVILEHKSIICAGYSAVMHIHCAAEEVTVKALICLVDKKTGDKSKTRPRFVKQDQVAIMRVEICMEQFKLFPQMGRFTLRDEEIRVMMDKKRNIRNMSVIAHVDHGKSTLTDSLVSKAGIIASAKAGETRFTDTRKDEQERCITIKSTAISMFFELEDKDLVFIGFLINLIDSPGHVDFSSEVTAALRVTDGALVVVDCVSGVCVQTETVLRQAIAERIKPVLFMNKMDRALLELQLEAEELYQTFQRIVENVNVIIATYSDGPMGEVRVDPSKGSVGFGSGLHGWAFTLKQFAEMYAEKFKIKLMKRLWGENFFNPKTKKWRSFCMYVLDPIYKFDCIMNKKDEAASLLQKLLKAEDKDKDGKALLKVVMRTWLPAGEALLQMIAIHLPSPVVAQKYRMEMLYEGPHDDEAAKNCDPNAPLMMYISKMVPTSDKGRFYAFGRVFSGKVATGMKARIMGPNYVPGKKEDLYEKAIQRTILMMGRYVEAIEDVPSGNICGLVGVDQFLVKTGTITTFKDAHNMRVMKFSVSPVVRVAVEPKNPADLPKLVEGLKRLAKSDPMVQCIIEESGEHIIAGAGELHLEICLKDLEEDHACIPLKKSDPVVSYRETVSEESDQMCLSKSPNKHNRLFMKAQPMPDGLAEDIDSGVNPRDEFKARARYLGEKYEYDVTEARKIWAFGPDGTGPNLLLDCTKGVQYLNEIKDSVVAGFQWATKEGVLSEENMRAVRFNIYDVTLHTDAIHRGGGQIIPTTRRCLYACVLTAQPRLMEPVYLCEIQCPEVAVGGIYGVLNRRRGHVFEEMQIAGTPMFVVKAYLPVNESFGFTADLRSNTGGQAFPQCVFDHWQVLPGDPKPFGVVQETRKRKGLKEGLPDLTQYLDKLDSGASVTYPMQCSALRKNGFVMLKSRPCKIVEMSTSKTGKHGHAKVHLVGIDIFNAKKYEDICPSTHNMDVPFVKREDYQLTDISDDGYLCLMDNGDLREDLKVPDGTVLKSCGEECVIATRTYDLHITYDKYYQTPRMWLFGYDENRKALTVEQMYEDVSQDHAKKTVTMETHPHLPGPPMASVHPCKHAEVMKKIIQTVTEGGGELGVHMYLIIFLKFVQAVIPTIEYDYMGRRPARCYRYCKNKPYPKSRFCRGVPDPKIRIFDLGRKKARVEDFPLCVHLVSDEYEQLSSEALEAGRICANKYMVKNCGKDQFHIRMRLHPFHVIRINKMLSCAGADRLQTGMRGAFGKPQGTVARVRIGQPIMSVRTSDRHRAAVVEALRRAKFKFPGRQKIYVSKKWGFTKYERDVYEKLRDEGRLACDGCNVKYRPEHGPLFDDMNLKEELLRGIYAYGFEKPSAIQQRAIIPCVKGHDVIAQAQSGTGKTATFSISILQQIDTSNHECQALILAPTRELAQQIQKVVIALGDFMSAQCHACIGGTNVREDMRKLDHVVVGTPGRVYDMISRRALRTNSIKLFVLDEADEMLSRGFKDQIHDVFKTLQVILLSATMPSDVLEVTSCFMRNPIRILVKKEELTLEGIKQFFVFVEREDWKLETLCDLYDTLSITQAVIFCNTRRKVDWLTENMHNRDFTVSAMHGDMEQRERDIIMRQFRTGSSRVLITTDLLARGIDVQQVSLVINYDLPSNRENYIHRIGRGGRFGRKGVAINFVTEEDKRTLKDIEQFYNTHIDEMPMNVADLI-----------------------GSENFYSVFEAELAETIPVVHASLAGCRIIGRMCVGNKNGLLVPNSTTDTELQHLRNSLPDTVRVQRVEERLSALGNVIACNDYVALVHPDLDRETEEILADVLKVEVFRQTVASNVLVGSYCVLSNQGGLVHPHTSVQDQDELSSLLQVPLVAGTINRGSEVIAAGMVVNDWCSFCGMDTTATELSVIESVFKLSIAPSIFGATDIKKAIACLLFGGSRKRLPDGLTRRGDINILLLGDPGTAKSQLLKFVEKVSPIGVYTSGKGSSAAGLTASVSRDPATRNFVMEGGAMVLADGGVVCIDEFDKMREDDRVAIHEAMEQQTISIAKAGITTTLNSRCSVLAAANSIFGRWDDTKGEENIDFMPAILSRFDMIFIVKDEHCGPRLSEAAGEKLKNQYVLMRSGTREHELETEKRLS-------------------------------------------------------------------------------------------------------------------------------LQKAIDLVTKATEEDRNKNYEEALRLYEHGVEYFLHAIKYEAQGERAKESIRTKCLQYLDRAEKLKKKLQSKLEGAIVVEKPHVKWSDVAGLEGAKEALKEAVILPIRFPHLFTGKRIPWKGILLFGPPGTGKSYLAKAVATEANNSTFFSVSSSDLVSKWLGESEKLVKNLFELARQHKPSIIFIDEVDSLCSSRSDNESESARRIKTEFLVQMQGVGNDNDGILVLGATNIPWVLDAAIRRRFEKRIYIPLPEEHARLTMFKLHLGTSHTLLAKNTEGYSGADISIVVRDALMQPVRKVQTATHFRRVRGPSRTDPNVIVDDLLTPCSPGCPGAIEMTWMEVEGDKLFEPPVTMSDMMRSLATSKPTVNDEDMAKLDKFTEDFGQEG---AVPAHRYSPLKENWMKIFSPIVEHLHLQIRFNLKTRNVEIRTCAETDIGNLQKAADFVKAFIYGFEVDDALALVRLDDLFIETFEIKDVKPLKGDHMSRAIGRLAGKGGRTKFTIENVTKTRIVLADSKIHILGSFQNIQLARAICNLIMGSPPSKVYGIFTPTNQIRLTNVAVVRMKKGGKRFEIACYRNKVVSWRNKIETDIDEVLQTHTVFTNVSKGQVAKKEDLIKAFGDDQTEVCKEILAKGELQVSDKERQSQHDSLFKDIATTVADKCVNPETKRPYPVSMIEKAMKDVHFSVKPNRNAKQQALDVIPLLKMFLTRSEYDRGVNTFSPEGRLFQVEYAIEAIKLGSTAIGICTSEGVVLAVEKRITSPLMEPTTIEKIVEVDKHIGCAVSGLMADSRTMIDRARIECQNHWFIYDEKMSVESVAQAVSNLAIQFGDSDDDAMSRPFGVAILFAAKGPQLYHMDPSGTFVQFEAKAIGSGSEGAQQSLQEVYHKSMTLKEALNAVLTILKQVMEEKLSSTNVEYDRAITVFSPDGHLLQVEYAQEAVRKGSTAVGVRGKDVVVLGVEKKSVAKLQEERTVRKICLLDDHVVMAFAGLTADARILINRAQIECQSHKLTVEDPVTLEYITRYIAGLKQKYTQSNGRRPFGISCLLAGFDYDGPHLYQTEPSGIYYEWKANATGRSAKTVREFLEKYYNEELVSTEKGTVKLAIRALLEVVQSGRKNLEIAVMRYDTRTTIFSPEGRLYQVEYAMEAISHAGTCLGILANDGILLAAERRNTNKLLDEVFFSEKIYKLNDDMVCSVAGITSDANVLTNELRMIAQRYLLQYGESIPCEQLVSWLCDVKQAYTQYGGKRPFGVSILYMGWDKHYGYQLYQSDPSGNYGGWKATCIGNNSAAAVSNLKQEYKEGETTLKDAMALAIKVLSKTLDMTKLTAEKVEMATLTRYSFSLTTFSPSGKLVQIEYALAAVAAGAPSVGIKASNGIVLATENKHKSILYDEHSVHKVEMITNHIGMVYSGMGPDYRLLVKRARKMAQQYFLVYQVPIPTAQLVQRVAMVMQEYTQSGGVRPFGVSLLICGWRPYLFQCDPSGAYFAWKATAMGKNFINGKTFLEKRYSEDLELDDAVHTAILTLKEGFEGQMTADNIEVGICGFRRLDPSNVKD-----HITIFSPEGRLYQVEYAFKAINQGGLTSVALKGVDTAVVATQKKVPDKLLDSSTVTHLFKLTSRIGCVMTGMIADSKSQVQRARYEASNWKYKHGYEIPVDALCRRVADISQVYTQNAEMRPLGCSMILIAYDDEGPCVYKTDPAGYFCGYRAISVGSKQTEANSYLEKKLKKKEAIQLAITCLSTVLSVDFKPSEIEVGVVTKDNPEFRILGE--MTSKAELACVYSALILADDDVAITGEKIQTILKAASVDVEPYWPGLFAKALEGISVKDLITNVGSSKVSRDTLYECIGAVLKNSKKRGFLETVEIQIGLKNYDPQKDKRFSGTVKLKHIPRPKMQVCVLGDQQHCDEAKANNVPYMDVEALKKLNKNKKLVKKLAKKYDAFLASEALIKQIPRLLGPGLNKAGKFPGLLSHQEAMKIDEVKATIKFQMKKVLCLSVAVGHVGMTEDELVQNVHLSINFLVSLLKKHWQNVRSLHVKSTMG------MPPKFDPSEVKVVFLRCVGGEVGATSSLAPKIGPLGLSPKKVGDDIAKATSDWKGLKITVKLTIQNRQAAISVCPSAASLIIKALKEPPRDRKKQKNIKHSGNLSFDDILNIAKTMRRSMSRKMEGTVKEILGTCQSVGCTVEGKHPHDVIDQINNGELEVP-----------------------------------MHRAPRPSRPDKARRMGYKAKQGYVIYRIRVRRGGRKRPVPKGATFGKPKSHGVNQLKPTRNLQSIAEERVGRRCGGLRVLNSYWVAQDSTYKYFEVILIDPSHKAIRRDPKSNWICKAVMKHRELRGLTSAGRKSRGLGKGHRYSQTVGGSRRAAWLRRNSLQLRRKR----------------------------------TLRRMALRRAVRYLKNVIEHKECVPFRRFNGGVGRCAQAKQWKTQGRWPKKSAEFLLQLLKNAESNADYKGLDVDRLVIDHIQVNRAPCLRRRTYRAHGRINPYMSSPCHIEVVLTEKEMKIGLCAYSGYKIYPGHGKTMVKTDGKTFTFLNAKCESSHLMKRNPRKVTWTVLYRRKHKKGQEEEQAKKRTRRTQKFQRAIVGASLTDIMAKRNMKPEVRKAQREQAIRRKVRTSVHFRRPKTFQPPRNPKYPRKSVPKRNRMDAFNIIKFPLTTEAAMKKIEDNNTLVFIVHTRANKHHVRAAVKKLYDIDVAKVNTLIRPDGKKKAYVRLARDYDALDVANKIGIISHRKFSAPRHGSMGFYPKKRSQRHRGKVKAFPKDDPSKPVHLTAFIGYKAGMTHVVREADRPGSKVNKKEIVEAVTILETPPMVVVGVVGYIETPHGMRALKTVWAEHLSEDCRRRFYKNYKSKKKAFTKTSKKWQDDLGRKSIDKDFKKLVRYCKVIRVICHTQMKLLKKRQKKAHIMEIQLNGGTIEQKVQWAREHLEQLVPVSQVFTSDEMIDVIGVTKGKGYKGVTSRWHTKKLPRKTHKGLRKVACIGAWHPSRVSFTVARAGQKGYHHRTEMNKKIYRIGQGKVVKNNASTEYDLTEKSITPMGGFPHYGEVINDYVMLKGCVMGPKKRVITMRKSLLVHTKRKALEKINLKFIDTSSKFGHGRFQTAADKKSAINEVVTREYTINLHKRLHGVGFKKRAPRAIKEIRKFAMKQMGTPDVRVDTRLNKQVWSKGIRNVPFRVRVRLSRRRNDDEDSPNKLYTLVTYVPVVTFKGLQTENVDIVKKRTKHFIRHQSDRYKKLKQSWRKPKGIDNRVRRRFKGQYLMPSIGYGSNRKTKHMLPTGFRKVLVHNVKELEVLLMQNRKFCAEIAHAVSSKKRKSIVERAQQLSIRVTNANARLRSEENEKGHRTTRPSRLKGKHTKFVRDLIREVCGHAGYEKRAMELLKVSKDKRALKFLKRRLGTHIRAKRKREELSNILTQMRKXXXXXXXXXXXXXXXXXXXXXXXXXXXXXXXXXXXXXXXXXXXXXXXXXXXXXXXXXXXXXXXXXXXXXXXXXXXXXXXXXMSAHKTFRIKRKLAKKLKQNRPIPQWVRMRTDNTIRYNAKRRHWRRTKLK-DKAAWKSNYFTKLVQLLDDYPKCFIVGADNVGSKQMQQIRMSLRGTAVVLMGKNTMMRKAIRGHLERNPALEKILPHVRGNVGFVFTRGDLVEVRDKLLENKVRAPARNGAIAPCPVIIPAQNTGLGPEKTSFFQALSIPTKISKGTIEIINDVHILKEGDKVGASDATLLNMLNISPFSYGLLVQMVYDSGTIFEPAILDIKPEDLRVKFMEGVARLAAVCLSISYPTLASAPHSIINGFKNLLAIAAATDFREAQTVKEFLKDPSKFVDPFTRKDWYDVKAPSMFATRQIGKTLVNRTQGTKIASEGLKYRVFEVSLADLQNDERSFRKFRLIAEDVQGRNVLTNFHGMDLTTDKLRSMVKKWQTLIEANVDVKTTDGYLLRVFCIGFTNKSQRKTCYAQHTQVRAIRKKMVEIITRDVTSSDLKEVVNKLLPDSIAKDIEKACQGIYPLHDVYIRKVKVLKKPRFELSKLLELHGPEGYEPPVQETVMLMPKKNRVAIYEYLFKEGVMVAKKDFHAPKHIPNLQVIKAMQSLKSRGYVSEQFAWRHFYWYLTNEGISYLRNYLHLPAEIVPSTLKERAFQKQPHLNLNRKKPLRRHRNVGLGFKTPREAIDGTYIDKKCPFTGNVSIRGRILTGVVQKMKMQRTIVIRRDYLHYIRKYNRFEKRHRNMSVHLSPCFRDVELGDVVTVGECRPLSKTVRFNVLKVSKHRIRITLTSRNVRSLEKVCADLINGAKKQNLRVKGPVRMPTKILRITTRKTPCGEGSKTWDRFQMRIHKRVIDLHSPSEIVKQITSISIEPGVEVEVTIAD-----------------MVVDVLHPGQPSVKKTEIREKLAKMYKVTSDLVFCFGFRTAFGGGKSTGFALIYDTMDYAMKFEPKHRLSRHGLFERKQRKERKNRMKKVRGTRKVRDKLNNQVLFDKATYDKLLKEVPQYKLITPSVVSERLKVRGSLARRALDELLQKGLIKQ--------------RGPKKHLKRLNAPKAWMLDKLGGVYAPRPSTGPHKLRESLPLVIFLRNRLKYALTNCEVKKIVMQRLIKVDGKVRTDPNYPAGFMDVVTIEKTGEYFRLIYDVKGRFTIHRITPEEAKYKLCKVKRVQTGPKGIPFLVTHDGRTIRYPDPVIKVNDTVQLDIANSKIMDSIKFDSGNLCMITGGRNLGRVGTVVNRERHPGSFDIVHIKDTQGHTFATRLNNVFIIGKTTKPYVSLPRGKGVKLSIAEERDKRMKLNVSYPASGCQKLFEVTDEHKLRIFYEKRMGSEVEADALGDEWKGYIVRIAGGNDKQGFPMKQGVLTNGRVRLLLSKGHSCYRPRRDGERKRKSVRGCFVDSNLSVLALVIVKKGEQDIPGLTDITIPRRLGPKRASKIRKLFNLGKEDDVRQYVVKRPLPLKEGKRKKAPKIQRLITP-------DQCEIQISQALVDLEMNSDLKTQLRELYITKAREKKSIIIYVPIPQLKAFQKVQTRLVRELEKKFCGRHVVFIGERKILPKPTRKNKQKRPRSRTLTAVYDAILEDLVFPAEIVGKRIRVKLDGSQLIKVHLDKNQQTNIEHKVETFASVYKKLTGREVTFEFMGISRDHWHKRRATGGKRKPLRKKRKFELGRPAANTKLGAKRIHTVRTRGGNKKYRALRLDQGNFSWGSECCTRKTRIIDVVYNASNNELVRTKTLVKNAIVVIDATPFRQWYEAHYALPLGRKKGAKLKRSKKVEKKYKARERLAKVEAALEEQFQASRVLACISSRPGQCGRADGYILEGKELEFYMRKIKAKKLCAKAREILVEESNVQRVDSPVTVCGDIHGQFYDLKELFKVGGDVPETNYLFMGDFVDRGFYSVETFLLLLALKVRYPDRITLIRGNHESRQITQVYGFYDECLRKYGSITVWRYCTEIFDYLSLSAIIDGKIFCVHGGLSPSIQTLDQIRTIDRKQEVPHDGPMCDLLWSDPETQGWGVSPRGAGYLFGSDVVAQFNAANDIDMICRAHQLVMEGYKWHFNETVLTVWSAPNYCYRCGNVAGKLVSVIGDEDTCVGFLLGGVGEINKNRHPNFMVVDKNSSVSEIEECFKRFVRRDDIDIILINQNVAEMIRHCIDSHPVPSVLEIPSKDHPYDASKDSILRRARGMFNPDD---------------------------------KDSQVIIRARSLREHGKYIPKQSFLMRRQFFNNEEAGYFKTQNPMTDPSMMTDMLKGNVTNVLPMIVIGGWINWMFSGFVTTKVPFPLTLRFKPMLQRGIELLSLDAAWVSSASWYFLNVFGLRSIYTLVLGENNAADQARHLQDQMSGAAMAMPPDPMGDRYNIHSQLEHLQSKYIGTGHADTTKFEWLVNQHRDSFASYMGHFDLLNFFAISENEAKARVRFNLMEKMLQPCGPPPEKPEDLVLVLGDLHIPHRCSSLPAKFKKLLVPGRIQHILCTGNLCTKESYDYLKTLASDVHVVRGDFDENYPEQKVVTVGQFRIGLCHGHQVVPWGEPDSLALIQRQLDVDILISGHTHKFEAYEQENKFYINPGSATGAYNPLPSFVLMDIQSSTVVTYVYQLVGDEV---------PDGDAEKGKKVFVQRCAQCHTVEASGKHKTGPNLHGLFGRKTGQAPGFVYTDANKAKGITWNKDTLFVYLENPKKYIPGTKMVFAGIKKPQERADLIAYLEQSTMENDAGEFVDLYCPRKCSASNRIIHAKDHASIQINIATETSKMYAICGAIRRMGESDDCINRLAKKDGVLAKNDPFADAIKQDGLVHIRIQQRNGRKTLTTVQGLSSEYDLKKIVRACKKEFACNGTVIEHPEYGEVLQLQGDQRENICQWLTKAGLAKPEQLKVHGFFEARLVQSSILKKVLEAIKDLLNEATFDCSDSGIQLQAMDNAHVSLVSMNLRSDGFDKYRCDRNISMGMNLGSMAKILKCAANEDVVTMKAQDDTVTFVFESPNQEKVSDYEMKLMNLDQEHLGIPETDYACVVRLPAVEFARICRDLSQFGESVIISCTKEGVKFSSVGDIGAANIKLAQTSNVDKEEQAVTIEMQEPVSLTFASKYLNSFTKATSLSTVVQLSMSPDVPLVVEY----------------GYVFAVSGPVVTAERMSGSAMYELVRVGYFELVGEIIRLEGDMATIQVYEETSGVTVGDPVLRTGKPLSVELGPGILGSIFDGIQRPLKDINELTQSIYIPKGVNVPALSRTVQWDFKVGSHITGGDLYGIVHENTLVKHKLLLPPRAKGTVTYIAAPGNYTVDDVVLETEFDGERSKYTMLQVWPVRQPRPVTEKLPANHPLLCGQRVLDSLFPCVQGGTTAIPGAFGCGKTVISQSLSKYSNSDVIIYVGCGERGNEMSEVLRDFPELTVEIEGNTESIMKRTALVANTSNMPVAAREASIYTGITLSEYFRDMGYNVSMMADSTSRWAEALREISGRLAEMPADSGYPAYLGARLASFYERAGRVKCLGNPDREGSVSIVGAVSPPGGDFSDPVTSATLGIVQVFWGLDKKLAQRKHFPSINWLISYSKYMRALDDFYDKNFPEFVPLRTKVKEILQEEEDLSEIVQLVGKASLAETDKITLEVAKLLKDDFLQQNSYSPYDRFCPFYKTVGMLRNIIAFYDMSRHAVESTAQSNKITWSVIRDSMGNILYQLSSMKFKDPVKDGEAKIKADFEQLHEDIQQAFRNLED-------MIMKARLKGAQKGHSLLKKKADALQMRFRQILGKIIETKTLMGEVMKEAAFSLAEAKFATGDFNQVVLQNVTKAQIKIRTKKDNVAGVTLPVFESYQDGDTYELAGLARGGQQLAKLKKNYQSAVKLLVELASLQTSFVTLDEVIKITNRRVNAIEHVIIPRIEKTLAYIISELDELEREEFYRLKKIQDKMPQNEYIERHRKLYGYRLDYHERKRKKEAREPHKLAEKAKKLRGLKAKMFNKQRRTEKIQMKKKIKTHEEKQVKALPVYLLDRDQSRAKVLSNMIKQKRKEKAGKWDVPIPKVKAQADSEVFRVLRTGKSRRKAWKRMVTKVTFVGEGFTRKPPKFERFIRPMALRFKKAHVTHPELKATFCLPIIGVKKNPSSPMYTSLGVITKGTIIEINISELGLVTQAGKVVWGKYAQVTNNPENDGCINAVLL
Daphnia_magna                  --------------------------------------------------------------------------------------------------------------------EAVKYIQDNLTLTVDELGKDCLINAAKTSMSSKIISADANFFAAMCVDAANAVRDNKGQAIYPIKAINVLKAHGKSARESLLINGYALNCSVASQAMVKKITNAKIACLDFSLQKTKMKMGVQVLVTDPEKLDAIRQRESDITKERIQKILNAGANVILATGGIDDLCLKYFVEAGAMAVRRCKKSDLKRIAKATGATLLSSMANLEGEESFEASAVGEAAEVSTERICDDELIVIKRTAASIILRGPNDFYCDEMERSVHDALCVVKRVLESKTLVVGGGAVEVALSIYLESFATSLSSREQLAIAEFAHSLLVIPKTLAVNAAKDATDLVAKMRSYHHSSQSHVNLKWIGLDLMEGAVRDNRQAGVFEPAVSKIKSLKFATEAAITILRIDDMIKL---------------------------------------------------------------------------------------------------------------------------------------------------------------------------------------------------------------------------------------MDRVLREERAYILNVAKQVKKAGCNVLLVQKSILRDAVSELALHFFDKMKIMVVKDIEREDIEFITKTLNCRPIASLDHFLPEYMASADLVESGTSKVVKITGIQNITVSVIVRGSNKLVLEEAARSLHDALCVIRCLVKKRFIIAGGGAPETELAYQLTQYAQGLPGVEAYCLRAFAESLEVIPMTLAENAGLNPIATVTDLRNKHACGFKSSGINVRKGAITNMLDEGVAQPLLVTTSAITLASETVRSILKIDDIFDEYGRPFIIIKDQDRQKRLTGNAAIKSHILAARTVASTLRTSLGPKGLDKLMVSADGDITITNDGATILKMMDVDHQIAKLLVQLSQSQDDEIGDGTTGVVVLAGALLEKAEHLLDKGVHPIRIADGFEMAARCAIQSLERSAETFPLDVNNEPLIQTAMTTLGSKIINKCHRHMAEIAVNAVLAVADMETRDVNFELIKVETKVGGQLEDTMLVKGVIVDKDFSHPQMPKVLRNVKIAILTCPFEPPKPKTKHKLDVTSVEDYKNLRKYEHEKFEEMVQQVKDSGAGLAICQWGFDDEANHMLLQRELPAVRWVGGPEIELIAIATGGRIVPRFEELTPDKLGYAGVVKELCFGTTKDRMLVIEECTNSKAVTIFIRGGNKMIVEEAKRSIHDALCVVRNLVRDNRIVYGGGAPEISCAIAVAKEADAIKTLEQYPFRAFADALESIPLALAENSGLNPIHTLTEIKSRQVAENNPALGIDCL----------------------------------------AKDVRFGAEVRAAMLQGVDVLADAVAVTMGPKGRNVILEQSWGSPKITKDGVTVAKGIELKDKFQNIGAKLVQDVANNTNESAGDGTTAATVLARSIAKEGFEKITKGANPVEVRRGVMLAVDSVIGNLRAMSKQVTTPEEIAQVATISANGDGKLISQAMNKVGREGVITVKDGKTLIDELEVIEGMKFDRGYISPYFINTAKGAKVEYQDALVLLSEKKISSIQSIIPALELANRKPLVIIAEDIDGEALSTLVVNRLKIGLQVVAVKAPGFGDNRKNTLHDMANATGGLVFGDEANLVKLEDIQLHDFGQVGEVVVTKDDTLLLRGKGRKEDIAQRVTMIKDQIAETTSEYEKEKLQERLAKLASGVAVLKIGGSSEVEVNEKKDRVNDALCATRAAVEEGIVPGGGTALLRCIPALDKLHFANEDQKVGIDIIRRALRMPCMTIAKNAGVDASVVVAKVGYDALRNEYVNMIERGIIDPTKVVRTSLTDAAGVASLLTTAECVVCEIPKYNFKKIVIVPTAKDFIDIVLSKTQRKTPTVVHKQYKISRIRQFYMRKVKFSQQTFHDKLSTILTDFPKLDDIHPFYADLMNVLYDKDHYKLALGQINIALHLIDNVSKDYVRLLKYGDSLYRCKQLKKAALGRMATIMKRQAQSLQYLEQVRQHLSRLPSIDPNTRTLLICGFPNVGKSSFINKITRADVEVQPYAFTTKSLFVGHTDHRYLRWQVVDTPGILDHPLENRNTIEMQAIAALAHLRAAILYVMDISEQCGHTIEQQVALFESIKPLFANKPLLVVLNKTDVIRLEELSEEGVMAVKSEACERLLAHRIEVKIKSKKRLHVAVPKPRDVVRPAFVPKTERDLEVELEDDYSLDLKKNYFKYDVIPEFWEGKNIADYIDPKEHINVVFIGHVDAGKSTIGGQIMFLTGMVDKRTLEKYEKEAREKNRESWYLSWALDTNLEEREKGKTVEVGHASFETERKHFTILDAPGHKSFVPNMISGASQADLAVLVISARKGEFETGFEKGGQTREHAMLAKTAGVKHLVVLINKMDDPTVNWDEERYNECKEKLLPYLKKLGFNPQKDLTFMPCSGLTGAGLCPWYSGLPFIPLLDMPPLVRFVDRPFIMPIVDKYKDMGTVVLGKVEAGEAKKGQTLLVLPNKTPVVVDQLWSDEDEVTVVGPGENVKIKLKGVEEEDISSGFVLCDPNNSCKTGRIFDAQVVILEHKSIICAGYSAVCHIHTVAEEVSVKALICLVDKKTNEKSKIRPRFVKQDQIAIMRLEICMEPFKDFPQMGRFTLRDEEIRVMMDKKRNIRNMSVIAHVDHGKSTLTDSLVGKAGIIAGAKAGEMRFTDTRKDEQERCITIKSTAVTMYFELAEKDCLFIGFLINLIDSPGHVDFSSEVTAALRVTDGALVVVDCVSGVCVQTETVLRQAIGERIKPILFMNKMDRALLELQLDQEALYQTFQRIVENVNVIVATYADGPMGEISVDPSKGSVGFGSGLHGWAFTLKQFAEMYADKFKIKLMNRLWGENFFNPTTKKWRSFNMYVLDPLYKFDAIMNKKEETDSLLTKLLSLEDRDKDGKNLLKAVVRQWLPAGETLLQMIAIHLPSPAVAQKYRTEMLYEGPLDDEAAKNCDPNGPLMMYVSKMVPTTDKGRFYAFGRVFAGKVCTGMKARIMGPNYVPGNKADLYEKAIQRTVLMMGRFVEAIEDVPCGNICGLVGVDQFLVKTGTISTFKDAHNLRVMKFSVSPVVRVAVEPKNPADLPKLVEGLKRLAKSDPMVQCIIEESGEHIVAGAGELHLEICLKDLEEDHACIPLKKSDPVVSYRETVSEESDQVCLSKSPNKHNRLYMKAVPMPDGLAEDIDKGVNARDDFKIRGRYLSDKYEYDVTEARKIWCFGPDTTGPNLLIDVTKGVQYLNEIKDSVVAGFQWATKEGVLCDENMRSVRFNIHDVTLHADAIHRGGGQIIPTARRVFYASVLTAAPRLMEPVYLCEIQCPENAVGGIYGVLNRRRGHVFEESQVAGTPMFVVKAYLPVNESFGFTADLRSNTGGQAFPQCVFDHWQILPGNPKPAQVVADTRKRKGLKEGIPALDSYLDKLDSGASATFPMQCSALRKNGFVMLKSRPCKIVEMSTSKTGKHGHAKVHMVGIDIFNGKKLEDICPSTHNMDVPVVKREDFTLIDISGDGYLSMMDNGDLREDLKVPDGTVLKACGEECVIATRTYDLNITYDKYYQTPRLWVSGHDENRHPLSVDQMYEDVSQDHAKRTVTMETHPHIPGPPMASVHPCRHAEVMKFFIQTVTEGGRELGVHMYLIIFLKFVQAVIPTIEYDYMGRRPARCYRYCKNKPYPKSRFCRGVPDAKIRIFDLGRKKASVEDFPLCVHLVSDEYEQLSSEALEAGRICANKYLVKHCGKDAFHIRMRVHPFHVIRINKMLSCAGADRLQTGMRGAFGKPQGTVARVNIGQPIMSIRSSDKYKAAVIESLRRAKFKFPGRQKIYVSKKWGFTKFERGVYETMKENAQLEPDGANVKYRPDHGPLFDEMKLKEKLLRGIYAYGFERPSAIQQRAILPCIMGHDVIAQAQSGTGKTATFAISLLQQIDIDANECQALVLAPTRELAQQIQKVVLALGDYMDAQCHACIGGTNVREDLRKLSHVVVGTPGRVFDMINRRALKTSCIKVFVLDEADEMLSRGFKDQIYDVFKNLQVILLSATMPADVMEVTNHFMRNPIRILVKKEELTLEGIKQFYVQVEREEWKLDTLCDLYDTLSITQAVIFCNTRRKVDWLTEKMHERDFTVSAMHGEMEQKERDVIMREFRSGSSRVLITTDLLARGIDVQQVSLVINYDLPNHRENYIHRIGRGGRFGRKGVAINFVTEEDWRVLRDIEQYYNTTIEAMPMNVADLI-----------------------------------------------------------------------DQELQHIRNSLPDSVKIQRVEERLSALGNVIACNDYVALVHPDLDKETEEVLADTLNVEVFRHTIAGSVLTGSYCAFSNQGGIVHPKTTVADQDELSSLLQVPLVS-----------------------------------LQVFRTGKSTKVWQYYIISKVASIV---SSRKRMPDGLTRRGDINVLLLGDPGTAKSQLLKFVEKVAPIAVYTSGKGSSAAGLTASVIRDPTTRNFVMEGGAMVLADGGVVCIDEFDKMREDDRVAIHEAMEQQTISIAKAGITTTLNSRCAVFAAANSVFGRWDDSKGEDNIDFMPTILSRFDTIFIVKDEHCGPRLSEAAAEKLKNRYVLMRSGVREHEMDTEKRLNIPITVRQLEAVIRLSESLAKMQLQPFATDTHVDEALRLFQVSTLDAAMS--------------------------------------------------------------------------------------------------------------------------------------------------------GAIVMEKPNVSWSDVAGLEGAKEALKEAVILPIKFPQLFTGKRTPWKGILLFGPPGTGKSYLAKAVATEANNSTFFSVSSSDLVSKWLGESEKLVRNLFELARAHKPSIVFIDEIDSLCSTRSENESESARRIKTEFLIQMQGVGKDQQGILVLAATNIPWVLDSAIRRRFEKRIYIPLPEEPARLNMFKLAFGTKHSLLAKKTEGFSGADITILVRDALMQPVRKVQLATHFRRVRGPSTADPKVIVDDLLTPCSPGSPGAIEMNWMDVPGDKLLEPPVTM---------------------------------RKIAVPAHRYSPLKENWMKLFTPIVEHLHLQIRFNLKNRQVEIRTCKDTDIANVQKAADFVKAFICGFEVEDALALIRLDDLFVDSFEIKDVKSLKGDHLNRAIGRLAGKGGRTKFTIENVTKTRIVLADQKIHILGSYQNIQIAKAICNLILGSPPSKVYGIFTPTNQIRLTNVAVVRMKKGGKRFEIACYKNKVVSWRNKVETDLDEVLQARTVFTNVSKGQVAKKEDLLASFGEDQNVICQEILAKGELQVSEKERHVQQDSMLKEIATMVSDKCVNPETKRPYPVTMIEKAMKDIHFSVKPNRNCKQQTLEVIKMLKMFLTRSEYDRGVNTFSPEGRLFQVEYAIEAIKLGSTAIGIQTSEGVVLAVEKRITSPLMEPTTIEKIVEIDKHIGCAVSGLMADSRTMVDRARVEAQNHWFTYDEKMSVESVAQAVSNLAIQFGDSDDDAMSRPFGVAILFAEKGPQLFHMDPSGTYVQYDAKAIGSGSEGAQQSLQEAYNKSLTLKSAMKTALTILKQVMEEKLSSTNVEYDRAITVFSPDGHLFQVEYAQEAVKKGSTAVGVRGKNLVILGVEKKSVAKLQEERTVRKICLLDDHVVMAFAGLTADARILINRARIECQSHKLTVEDPVTLEYITRYIAGLKQRYTQSNGRRPFGISCLLAGFDFDGPHLYQTDPSGTYHEWKANATGRNAKTVREFLEKNYNLEEMEDEEKVIKLAIRALLEVVQSGSKNLELAIMRYDTRTTIFSPEGRLYQVEYAMEAIGHAGTCLGILASDGIVLAAERRNTNKLLDEVFFSEKIYQLNADMVCSVAGITSDANVLTNELRLISQRYLLQYGESIPCEQLVSWLCDVKQAYTQYGGKRPFGVSLLYAGWDHQYGFQLYQSDPSGNYGGWKATCIGNNSAAAVSMLKQEYKEGETRIDDALALAIRVMSKTMDATKLTPDKLELATLTR--------APSGKLVQIEYALAAVAAGAASVGIKAANGVVLATEKKHRSILYEEHSVHKIEMITPKIGMVYSGMGPDYRLLVRQARKMAQQYWVTYQEQIPTAQLVQRVATLMQEYTQSGGVRPFGVSLLMCGWRPYLFQCDPSGAYFAWKATAMGKNYINGKTFLEKRYNEDLELDDAVHTAILTLKEGFEGGMTEDNVEIGICGFRRLSPAEVKDAGFDRHITIFSPEGRLYQVEYAFKAINQGGLTSVALKGVDTAVVVTQKKVPDKLIDPSTVSHIFKITTNIGCVMTGMTADARSQVQRARYEAANWKYKYGYEIPVDVLCKRIADICQVYTQNAEMRPLGCSMIVIAYDEEGPAVYKADPAGYYCGYRATSVGVKQTEASSYLEKKYKKKEVIQLAITTLSHILTADFKPSDIEIGVVSKDEPAFRILSETE--SKDELACVYAALVLLDDDVAITAEKIQTILKAADVKVEPYWPGLFAKALEGLNLKSMITNVGSSKVSRDTLYEAVNNMLTQSKKRRFTETVEIQFGLKNYDPQKDKRFSGTVKLKHIPRPAMKVCILGDQQHCDEANANNLPCMDAEALKKLNKNKKLVKQLAKKYDAFLASEALIKQIPRLLGPGLNKAGKFPGPLTHSDSMKVEEVKGTIKFQMKKVLCLCVAVGHVKMSADDLAQNIHLSINFLVSLLKKHWQNVRSIHIKTTMGVPQRLYMPPKFDPSEVKIIYLRAVGGEIGATSSLAPKIGPLGLSPKKVGEDIAKGTQDWKGLKITVQLTIQNRQAAVSVVPSASSLVIKALKEPPRDRKKQKNIKHNGNITFDEVISIARIMRRSQSRYLIGTVKEILGTCMSVGCTIDGRTPRDITDAVTNG-----MGAYKYMQELYRKKQSDVMRFLLRMRCWQYRQLHRVHRAPRPTRPDKARRMGYRATQGFVIYRVRVRRGGRKRPVPKGCTYGKPKGHGVNHLKPTRNLQAIAEERVGRRCGGLRVLNSYWVGQDSTFKFYEVILVDTAHKAVRRNPKTQWIVNPVHKHRELRGLTSASKKSRGLGKGHGFCQTNGGSRRATWKRRNTLSLLRKRMGRYSREPDNPTKSCKARGSNLRVHFKNTREAANTIKRMPLKRAVAFLKNVIQHKECVPFRRYNGGVGRCAQAKQWGTQGRWPKKSAEFLLQLLKNAESNADLKGLDVDHLVIDHIQINRAPYMRRRTYRAHGRINPYMSSPCHMEVILAEKEMKISLCHYSGYKIYPGKGKTMVRTDGRTYQFLDSKCERAHLMKRNPRNTTWTVLYRRKHKKGQVEELAKKKTRKTQKFQRAIVGASLTEILAKRNQKPEVRKAQRDQAIKRKIRTSVQFRRPKTFRPPRNPKYPRQSAPKRSKMDAYNIIKHPLTTESAMKKIEDNNTLVFIVHPRCNKYQIRSSVKKLYDIDVAKVNTLNRPDGQKKAYVRLAPDYDALDVANKIGIISHRKFSAPRHGSMGFYPKKRCRSHRGRVKSFPRDDHKKPIHLTAFLAYKAGMTHIVRECDKPGSKVNKKEVVEAVTILETPPMVIVGIVGYVATPKGLRALKTVWAEHIGEDCRRRFYKNYKSKKKAFTKASKKWQDDLGKKVIEKELRAMKRYCKVIRVIAHTQMKLLRQRQKKAHMMEIQVNGGTVRQKVDWARQHLEKSVPITSIFAQDEMIDVIGVTKGKGFKGVTSRWHTRKLPRKTHKGLRKVACIGAWHPSRVQFTVARAGQKGYHHRTEMNKKIYRIGKGKVIKNNASTEYDLTDKSITPMGGFPHYGEVNNDFVMIKGCCMGPKKRVITLRKALVTSAKRVALEKIELKFIDTSSKFGHGRFQTPADKKSAINEVVTRDYTVNLHKRIHGISFKRRAPRAIKEIRKFAEQAMGTPDVRIETRLNKHIWSQGVRSVPFRVRVRLSRRRNEDEDSPHKLYTLVSFIPVATFKGLQTEN--IVKKRTKQFIRHQSDRYDKLKRNWRRPKGIDNRVRRKFKGQYLMPKVGYGSAKNTKHMLPNGFRKVVVNNVKELEILMMQNRKYCAEIAHAVSSKKRKIIVERAKQLAIKITNPNARLRSEENEKGFKTTRPSRRKGKHTKFIRDIVKEVAGHAPYEKRAMELLKISKDKRALKFLKRRLGTHLRAKRKREELGNVLTQMRK-TKGTSSFGKRHNKTHTLCRRCGRSSYHIQKSRCAQCGYPAKRLRHFNWSVKAKRRKTTGTGRMRHLKIVRIKFRNGFREGXXXXXXXXXXXXXXXXXXXXXXXXXXXXXXXXXXXXXXXXXXXXXXXXXXXDKTSWKANYFVKLVQLLEDYPKCFIVGADNVGSKQLQQIRRSLRDHAVVLMGKNTMIRKAIRGHLENNPALEKLLPHIRGNVGFVFTKSDLVDVRDRLTENRVRAPARAGALAPMPVDIEPQNTGLGPEKTSFFQALSIPTKISKGTIEIITTVNVIKEGERVDASAATLLNMLNISPFTYGLVVQQVYDSGTVFEPKILDIKPESLRTRFMEGVRNVASVSLRIGYPTLASAPHSLINGFKNLLAVAAATDFKEAMTVKEFLKDPSKFIDPFTRKDWYDIKAPSMFAVRQVGKTLVNRTQGTRIASEGLKGRVFEVSLTDLQNEERAFRKFKLISEDVQGRNLLTNFHGMDMTTDKLRSMVKKWQSLIEASVEVRTTDGYLLRVFCIGFTKKSTRKTCYAQHAQIKSIRKKMVDIITREVGSVDLKEVVSKLIPDSISKDIEKSCQGIYPLHDVNIRKVKVLKKPKFDIGKLLELH-------------MLMPKRHRALIYEYLFKEGVLVAMKDTHLAKHVPNLHVMKALQSLKSRAYVTEQFAWRHYYWYLTNEGIQYLRDYLHLPPEIVPATLKEKSFQKQPTVFLNKKKNLRYHRNVGLGFKTPREAIEGTYIDKKCPFTGDVSIRGRILTGVVQKMKMQRTIVIRRDYLHYIKKYNRFEKRHRNMSVHLSPCFRDVAINDVVTIGECRPLAKTVRFNVLKVNKHKIRITLTSRNVPSLEKVCSELVGAAKDKNLRVKGPVRMPTKTLRITTRKTPCGEGSKTWDRFQMRIHKRIIDLQSPAEIVKQITSFSIEPGVEVEVTIAD-------MTNRLLARKQMVVDVLHPGRSSVPKKEISEKLAKMYKVTPDVVSCFGFRTNFGGGKSTGFALVYDSMDFLKKFEPKHRLALKGMFE--------------------RDKLNNLILFDQATYDKLYKEVPAYKLITPAVVSERLKIRGSLARKALNELQQKGLIKQVV------------RGPKKHLKRLAAPKSWMLDKLGGVFAPRPSTGPHKLRESLPLVVFLRNRLKYALNNSEVTKIVMQRLIKVDGKVRTDSNYPAGFMDVITIDKTGEYFRLVYDVKGRFAIHRITAEEAKYKLCKVRRVQVGPKGIPFITTHDGRTIRYPDPLVKVNDTIQLDIETNKIMDFIKFDSGNLCMITGGRNLGRVGTIINRERHPGSFDIVHVKDALGHLFATRLNNVFIIGKGSKAYISLPRDKGVKLSIAEERNKRMKLNISYPATGAQKLVDIEDERKVRIFYEKRMGAEVEADGLGDEWKGYVFRIAGGNDKQGFPMKQGILTTGRVRLLFSKGHSCFRERRTGERRRKSVRGCIVDANLSVLAVVVVKKGEQEIPGLTDVTVPKRLGPKRASKIRKLFNLAKEDDVRQYVIKRPLPKKEGKRFRSPKIQRLVTP-------DEFENSIAHALLDLELNSDLKAQLRELHINAAKEKKAVIIFVPVPQLRAFQKIQTRLVRELEKKFSGKHVVFIAQRRILPKPTRRIKQKRPFSRTLTSVHDSILEDLVFPAEIVGKRIRIRLDATRLIKVHLDKNQQTNIEHKVETFAAIYKRLTGKEVTFEFMGISRDHQHKRRATGGKRKPIRKKRKFELGRPPANTKLGARRIHTVRVRGGNKKYRALRLDQGNFSWGSEGVSRKARIIDVVYNASNNELVRTKTLVKNAIIVVDATPFRQWYEGHYAIPLGRKKGAKLKKSKKSEKKYKSRQRLAKIEPGLEEQFMTGRLLVAISSRPGQCGRADGYILEGRELEFYLRKMKTKK-------------------------------FYDLEQLFRTGGQVPDTNYVFLGDFVDRGYYSLETLTRLLTLKAKYPNRITLLRGNHESRQITQVYGFYDECQNKYGNANAWRYCCQLFDLLTVAALIDGEVLCVHGGLSPSIRTLDQIRTIERNQEIPHKGAFCDLVWSDPEVETWTISPRGAGWLFGARVTHEFMHLNGLELICRAHQLVHEGYKFMFDDKLVTVWSAPNYCYRCGNVAGRLIAVIGDEDTCVGFLLGGIGEMNKNRQPNFMVVDKNTSISEVEDCFKRFLKRDDIDIILINQNVAEMIRHVIDNHPIPAVLEIPSKDHPYDASKDSILRRAKGMFSAEDDSNIRFWVFLPIIMITFLVGILRHYFSLIIASQKDSQALVRSRLLRENGKFLPRQAFLMRRHFFNSEDMGYFKTQNPMTDPNAMTDMLKGNVTNVLPMIIIGGWINWAFSGFVTTKVPFPLTLRFKPMLQRGVELVSLDASWVSSASWYFLNVFGLRSIYSLVLGENNAADQTKAMADQMSGAAMAMPQDPMGDRYNIHSQLEHLQSKYIGTGHADTSRHEWLSNQHRDSFASYVGHFDLLNHIAIAENESKARVRFNFMEKMLQPCGPPPEKTEDLVLVLGDLHIPNRCNALPAKFKKLLVPGRIHHILCTGNLCSKETLDYLKTLASDVHIVRGDFDKTYPEQKVVTVGQFKIGLVHGHQIVPWGDPESLASLQRQLGVDILITGHTHKFEAYEHDGKFFINPGSATGAYNPI----------------------------------PAGDVEKGKKLFVQRCAQCHTVEAGGKHKTGPNLNGLFGRKTGQAAGYVYTDANKSKGITWSEDTLFEYLLDPKKYIPGTKMVFAGLKKPNERADLIAYLEVATMQNDAGENVDLYIPRKCSASNRIIHAKDHASIQINVALPTFKTYAICGSIRRMGESDDCINRLAKKDGVLAK-DPFADADKQDGLVHIRIQQRNGRKTLTTIQGLSAEYDLKKIVRHCKKEFACNGTVVEHPEYGEVLQLQGDQRENICQWLTKTGLAKPEQLKVHGFFEARLLQGSLLKKVMEALKELLNEAAWDCSDAGIQLQAMDNSHVSLVSLNLRAEGFDKYRCDRNLSMGMNLGSMSKILKCASNEDIITIKAQDDTVTFVFESPDQDKVSDYEMKLMNLDQEHLGIPETDYACTIRLPSSEFARICRDLSQFGESMVISCTKEGVRFSATGDIGTGNIKLAQSAKVDKEEEAVVIEMQEPVSLTFACRYLNSFTKATSLSKSVQLSMSPEVPLVVEYKIEDIGHVRYYLAPKIGYVYAVSGPVVTAQKMSGSAMYELVRVGYSELVGEIIRLEGDMATIQVYEETSGVTVGDPVLRTGKPLSVELGPGIMESIFDGIQRPLKDINELTQSIYIPRGVNTPALSVTAEWDFRVGSHVTGGDIYGTVFENRMVKHKMMLPPRARGTVTWIASPGHYHVTDKILEVEFDGEKTGYSMLQVWPVRQPRPVVEKLPANYPLLTGQRVLDALFPCVQGGTTAIPGAFGCGKTVISQSLSKYSNSDVIIYVGCGERGNEMSEVLRDFPELTCEVDGITESIMKRTSLVANTSNMPVAAREASIYTGITLSEYFRDMGYNVSMMADSTSRWAEALREISGRLAEMPADSGYPAYLGARLASFYERAGRVKCQGSPEREGSVSIVGAVSPPGGDFSDPVTSATLGIVQVFWGLDKKLAQRKHFPSVNWLISYSKYMRALDDHYERHFPEFVPLRTKVKEILQEEEDLSEIVQLVGKASLAETDKITLEVAKLLKDDFLQQNGYSAYDRFCPFYKTVGMLRNMVGFYDMARHAVESTSQSNKITWGTIRESMGNILYQLSSMKFKDPVKDGEAKIKQDYDELHEQMQQAFRNLEDFPSRGAQTLMKHRLAGAQKGHGLLKKKADALQMRFRSILKKIIDTKVLMGDVMKEAAFSLAEAKFATGDFNQVVLQNVTKAQIKVRSKKDNVA-----VFESYQDGDTYELAGLARGGQQLGKLKKNYQKAVTLLVELASLQTSFITLDKVIKVTNRRVNAIEHVIIPRIERTLAV---------QKPFFRLKKIQDKMPQNEHIELFQKRYGFRMDYQERQRKKKAREHKLQSKMAQKLIGIKGKIFAKKRYSEKVQLKRTIKAHEEKKTRAMPAYLLDRETSQAKLLSSMVKQKRKEKAGKWDVPLPKVRAQSEAEVFRVLKTGKSRRKGWKRLVTKVCFVGEGFTRKPPKYERFVRPMALRFKKAH--------TICLQNFYV--NPQNATKTADGTAVPGIV----------------------------------------
Siro_boyerae                   RTTGSSIRTQNVMAACSIANIVKSSLGPVGLDKMLVDDIGDVTITNDGATILKMLEVEHPAAKVLVELAQLQDQEVGDGTTSVVIIAAELLKSADELVKCKIHPTSIISGYRLACKEACKYIQDHLTMNVDVLGRESIVNAAKTSLSSKLIGSESDFFANMVVDAATAVRDGAGGFKYPIKAVNVLKAHGKSTRESVLIAGYALNCTVASQAMPKRILNAKVACLDFSLQKVKMHLGVQVLVTDPEKLDAIRQRESDITKERIQKILSAGATVVLTTGGIDDLCLKYFVEAGAMAIRRCKKVDLRRIAKATGAQLLMSLSNNDGDEVFDASALGEAEEVAQERVCDEELLLIKHTAASIILRGANDFFVDEMERSIHDSLCVVKRVMESKHVVPGGGAVEAALSIYLENFATSLSSREQLAIAEYAKSLLVIPKTLAVNAAKDATDLVAKLRSYHNSSQTHAHLKWVGLDLYEGVVRDNQQAGVLEPAISKIKSLKFATEAAITILRIDDLIKLKEKPAQIRNSNICAAKAVADAIRTSLGPKGMDKMIQSANGDVTITNDGATILKEMQVLHPAARMLVELSKAQDIEAGDGTTSVVIIAGSLLDAAANLLAKGIHPTTISEAFQQAAVKAVDILMAVPVDLSDRESLLKSAITALNSKMVSQHSGLLAPMAVDAVMKNVDLRDIKIIKKLGGTVEDSELIEGLVFTQKGPTKVEKAKIGLIQFCISPPKTDMDNQLIVSDYTQMDRVLKEERTYILNIVKQIKKAGCNLLLIQKSILRDALSDLALHFLAKAKIMVVRDIEREDIEFVCKSLNCRPIASLDHFLPEALGSAELVEEGDSKFVKITGVANPTVTVLLRGSNKLVLEEADRSLHDALCVIRCLVKHRALIAGGGAPEIELSLRLGEHARTLTGMEAYCYRAFAEALEVIPLTLAENGGLHPISTVTELRNRHAQGEKTTGINVRKGAVTNILEENVIQPLLISTSAIKLAAETVRSILKIDDIFDEFGRPFLILKDQEKRRRLTGIEALKSHIMAAKSIANTLRTSLGPKGLDKMMISPDGDVTVTNDGATILKMMDVEHQIAKLLVQLSQSQDDEIGDGTTGVVVFAGALLDQAEKLLDRGIHPIRIADGFEMAARFAMEHLDKISDSFPVDPSNEPLIQTAMTTLNSKVVNRCLRQFAETAVSAVMTVADFDRRDVDFELIKVEGKEGGKLEDITLVKGVIVDKDFSHPQMPKNLKDVRLAILTCPFEPPKPKTKHKLDVTSVEDYRALRKYEHEVFEQMVQQVKDTGANLVICQWGFDDEANHLLLQRELPAVRWVGGPEIELIAIATGGRIVPRFSELTAEKLGKAGSVRELSFGTTKDHMLVIEECQNTRAVTIFIRGGNKMIVDEAKRSLHDALCVIRNLVKDNRIVYGGGAAEISCAIAVSEQADKISTLEQYAFRGFADALESIPLALAENSGLPPIRALTEIKASQVTQKNPCLGIDCLGAGTNDMKVQNVIETLTSKKQQISLATQLVKMILKIDDIRAKDIRFGPDVRAMMLQGVDILADAVAVTMGPKGRNVILEQSWGSPKITKDGVTVAKAIELKDRFQNIGAKLVQDVANNTNEEAGDGTTTATVLARAIAKEGFEKISKGANPIEIRRGVMMAVDKVVDHLKVLSKPVTTPEEIAQVATISANGDGDLISDAMKKVGRDGVITVKDGKTLLDELEVIEGMKFDRGYISPYFINTAKGAKVEFQDCLVLFSEKKISSVQSVIPALELANRRPLVIVAEDVDGEALSTLVLNRLKVGLQVAAVKAPGFGDNRRNTLLDMAVATGGTVFGDEANQNKLEDVKAGDLGQVGELTITKDDTLMLKGKGRREEIERRCEQLKDEMELTNSEYEKEKLGERLARLASGVAVLKVGGSSEVEVNEKKDRVNDALNATRAAVEEGIVPGGGTALLRCLPSLDQLRPENDDQEIGIEIVKKALKMPCMTIAKNAGVDAAVVVQKVGYDAMKNQYVKMIDAGIIDPTKVVRTALMDAAGVASLLTTAEAVVVELPKYNFKKITVVPASKDFVDIILSKTQRKTPTVIHKHYKISRIRHFYMRKVKYTQQNFHDKLSLIITDFPIMEDIHPFFADLMNVLYDKDHYKLALGQLNTARHLIDNVARDYARLLKYADSLYRCKQLKRAALGRMATIMKKQNANLQYLEQVRQHLSRLPSIDPNTRTILICGFPNVGKSSFINKITRADVDVQPYAFTTKSLFVGHTDYKYLRWQVIDTPGILDHALEERNTIEMQAITALAHLRACILYIMDVSEQCGHSIEEQIQLFESIKPLFSNKPMMVVVNKSDVLKIEELTGEGVMEVRNDSCERLLLHRVEAKMRNKRRLHLALPQKRDKERPPFIPKLERDIEQEMGDDYILDLKKNYEKYDIIPEIWQGCNIADYIDPKEHINVVFIGHVDAGKSTIGGQLLYLTGMVDKRTLEKYEKEAKEKNRESWYLSWALDTNQEERDKGKTVEVGRAYFETEHKHFTLLDAPGHRSFVPNMIGGACQADLAVLVISARKGEFETGFERGGQTREHAMLAKTAGVKHLVVLVNKMDDPTVEWSEERYNECKEKLIPYLKKCGFNPKTDMTFMPCSGLTGAFLCPWFRGQSFLDYIDLPLLNRPIEGPFRMPVVDKYKDMGTVVLGKVESGTIKRGQQLVLMPNKKSVEVLQLFSDEDEVLSIMSGENVKIKLKGVEEEEVSSGFVLCDSSMACKVGKIFDAQVVILEHKSIICPGYSAVLHIHAAVEEVSVKALICLLDKKTGEKSTQRPRFVKQDQIAIMRIEICMEPFKEFPQMGRFTLRDEEIRGLMNKKRNIRNMSVIAHVDHGKSTLTDSLVSKAGIIAASKAGEMRFTDTRKDEQERCITIKSTALSMYFELSAKDMCFIGFLINLIDSPGHVDFSSEVTAALRVTDGALVVVDCVSGVCVQTETVLRQAIAERIKPVLFMNKMDLALLTLQLEKEDLFQTFQRIIESTNVIIATYNDGPMGDIKVDPSKGSVGFGSGLHGWAFTLKQFSEIYAEKFKIKLMNRMWGDNFYNPQTKKWRAFCMFVLDPIYKFDAIMNKKEETARLLEKLLRGDDKEKDGKNLLKVVMRTWLPAGEALLQMIAIHLPSPVTAQRYRMEILYEGPMDDEAAKSCDATGPLMMYISKMVPTSDKGRFYAFGRVFSGVVQSGQKVRIMGPNYTPGKKEDLAEKAIQRTVLMMGRYVEPIEDVPCGNICGLVGVDQYLVKTGTITTFKEAHNMRVMKFSVSPVVRVAVEPVNPSDLPKLVEGLKRLAKSDPMVQCIIEESGEHIVAGAGELHLEICLKDLEEDHAGIPLKKTDPVVSYRESVAEESTITCLSKSPNKHNRLYMRAMPMQEGLAEDIDSGVNPKDDFKARGRYLADKYEWDATEARKIWCFGPEGTGPNLLVDVTKGVQYLNEIKDSVVAGFQWATKESVLCEENMRGVRFNIYDVTLHADAIHRGGGQIIPTARRCFYACMITAGPRLMEPVYLVEIQCPEGAVGGIYGVLNRRRGHVFEESQVTGTPMFVVKAYLPVNESFGFTADLRSNTGGQAFPQCVFDHWQILPGDPRPHVVVMETRKRKGLKDSLPDLDQYLDKL-AGASATYPVQCSSLRKNGFVMLKNRPCRIMEMSTSKTGKHGHAKVHLVGLDIFTNKKYEDLCPSTHNIDVPNVSRNDFQLIDMSDDGFASLMDKGETRDDLRLPEGTVMSAVGEEAII--RTYDLNITYDKYYQTPRLWLFGYDENRKPLTIEEMYEDISQDHAKKTVTMEAHPHLPGPPMASVHPCRHAEVMKKIIQTVMDGGGDLGVHMYLIIFLKFVQAVIPTIEYDYMGRRPARCYRYCKNKPYPKSRFCRGVPDPKIRIFDLGRKKARVDEFPLCVHLVSKEFEQISSEALEAGRICANKYLVKTCGKDAFHLRMRLHPFHVIRINKMLSCAGADRLQTGMRGAFGKPQGTVARVHINQIIMSVRAKEQHKENVIEALRRAKFKYPGRQRIGVSKKWGFTKWEFEEYEAMRNDGRLKPDG------------FDDMSLKEELLRGIYAYGFEKPSAIQQRAIMPCIKGSDVIAQAQSGTGKTATFSIAILQKIDTALKECQALILAPTRELAQQIQKVVIALGDYMSAQCHACIGGTNVREDIRKLEHVVVGTPGRVYDMISRRALRPSSIRIFVLDEADEMLSRGFKDQIYDVFKTLQVILLSATMPADVLDVTKRFMREPARILVKKEELTLEGIKQFYISVEREEWKLDTLCDLYETLTITQAVIFCNTRRKVDWLMEKMHGRDFTVSAMHGDMDQKERDVIMREFRSGSSRVLITTDLLARGIDVQQVSLVINYDLPTNRENYIHRIGRGGRFGRKGVAINFVTEDDKRTLHDIEQFYNTQIEEMPMNVADLIFENNNEVGVFSKLTNTYCLVAIGGSENFYSVFEGELTDVIPVIHTSIAGCRIIGRLTVGNRHGLLVPVSTTDQELQHLRNSLPDSVKIQRVEERLSALGNVIACNDYVALTHPDLDRETEEILTDILKVEVFRQTIADNVLVGSYTSLSNQGGLVHPRTSVEDQDELSSLLQVPLIAGTVNRGSEVIAAGLVVNDWCAFCGMDTTSTEVSVIENVFKLSIAPSIFGSLDIKKAIACLLFGGSRKRLPDGLTRRGDINVLLLGDPGTAKSQLLKFVCNVAPIAVYTSGKGSSAAGLTAAVTRDPVSRNFIMEGGAMVLADGGVVCIDEFDKMREDDRVAIHEAMEQQTISIAKAGITTTLNSRCSVLAAANSVFGRWDDSKSEENIDFMPTILSRFDTIFIVKDEHCGPRLSQEAGEKLKNRYVLMRNGTREHEQHADKRSSIPITVRQLEAIIRISESLAKMQLLPFATEVHVDEALRLFQVSTLDAAMSGNLSGAEGFTTEEEHEMITRIEKQLKRRFAIGSQVSEHSIVQDFLKQKYPERAIYKVLHFMIRRGEIQHRMQRKMLYRLQKAIDLVTRATEEDKNKNYDEALRLYEHGVEYFLHAIKYEAQSDKAKESIRAKCGQYLERAEKLKRKLMNQLEGAIVMEKPNIKWADVAGLEGAKEALKEAVILPIKFPHLFTGKRKPWKGILLFGPPGTGKSFLAKAVATEANNSTFFSISSSNLVSKWLGESEKLVKNLFDMGRQHHPSIIFIDEIDSLCSTRSDNESESARRIKTEFLVQMQGVSSDNEGILVLGATNIPWVLDSAIRRRFEKRIYIPLPEEVARLAIFKLHVGTPHMVLAKKTQGYSGADISVLVRDSLMQPVRKVQTATHFRKVRGPSRDNPDEIVEDLLTPCSPGCPGAIEMSWMDVPGDKLLEPVVTMSDVLLSLANSKPTVNEDDLVKLKQFMDDFGQEG-KIPIPTHRFTPLKENWMKIFTPIVENLHLQVRFNLKTRNVEIRTCKETDICCLQKAADFVKAFALGFDADDALSLLRLDELFLESFEVQDVKPLKGDHLSRAIGRLAGKGGKTKFTIENVTKTRIVLADRKIHILGSYQNIRAARAICSLILGSPPSKVYGXXXXXXXXXXXXXXXXXXXXXXXXXXXXXXXXXXXXXXXXXXXXXXXXXXXXXXXXXXXXXXXXXXXXXXXXXXXXXXXXXXXXXXXXXXXXXXXXXXXXXXXXXXXXXXXXXXXXXXXXXXXXXXXXXXXXXXXXXXXXXXXXXXXXXXXXXXXXXXXMFLTRSEYDRGVNTFSPEGRLFQVEYAIEAIKLGSTAIGIQTPEGVVLAVEKRVTSPLMEATTIEKIVEIDSHIGCAVSGLMADSRTMVDRARVEAQNHWFLYNEKMQVESVAQAVSNLAIKFGDSDDDAMSRPFGIAILFANGGAQLYHMDPSGTYVQYNAKAIGSGSEGAQQALQEAYHKAMTLQEALKHALTILKQVMEEKLNSSNVEYDRAITVFSPDGHLFQVEYAQEAVKKGSTAVGVRGANVVVLAVEKKSVAKLQEERTVRKICLLDDHVVMAFAGLTADARILIDRARVECQSHKLTVEDPVTLEYITRFIAQLKQRYTQSNGRRPFGISALIAGFDFDGPHIFQTDPSGVYHEWKANATGRNAKTVREYLEKNYSDTLVQADEAAIKLAIKALLEVVQG--KNL-----RYDSRTTIFSPEGRLYQVEYAMEAIGHAGTCLGILASDGIVLAAERRNTNKLLDEVFTSEKIYKLHDDMACSVAGITSDANVLTNELRHIAQRYLLQYGESIPCERLVSWLCDIKQAYTQYGGKRPFGVSILYMGWDKHYGFQLYQSDPSGNYGGWKATCIGNNSAAAISILKQEYKDGETTLSNALSLAVKVLSKTLDMTKLTADKLEMATLTRYSFSLTTFSPSGKLVQIEYALAAVAAGAPSVGIKASNGVVLATEKKHKSILYEEN-IHKVEMITKHIGMVYSGMGPDYRLLIGRARKIAQQYALIYEESIPTSQLVQKVAYIMQEYTQSGGVRPFGVSLLVAGWKPYLFQCDPSGAYFAWKATAMGKNYVNGKTFLEKRYTEELELEDAVHTAILTLKEGFEGQMTADNIEIGICGFKRL-------AGFDRHITIFSPEGRLYQVEYAFKAINQGGLTSIGVKGKDTAVLVTQKKVPDKLLDPSTVTHMFKITDYIGGAMTGLVADGQSQVLRARYEAANWRYKQSYDIPVDMLCKRIADISQVYTQNAGLRPLGCSMMFIEYDAEGAQLYKADPAGYFCSYKATSVGVKQTEANSYLEKKFKKRETVQLAITALSTVLSADFKPNEIEVGVVSKDNPKFRILNEQE-MASNELACVYSALILQDDDVAITGEKISTILKAANVEVEPYWPGLFAKALEGVDLKSLITNVGSSKVSRETLFECVNAVLENSKPRKFLETVELQIALKNYDPQKDKRFSGTVKLKNIPRPKFTTCVLGDQQHCDEAKANNVECMDAEALKKLNKNKKLVKKLAKKYDAFLASESLIKQIPRLLGPGLNKAGKFPTLLTHNEPMKIDEVKATIKFQMKKVLCLAVAVGHVKMTPEELAQNINLSINFLVSLLKKNWQNIRSLNIKSTMGPRQRLYMPPKFDPTEVKIVCLRAVGGEVGATSALAPKIGPLGLSPKKVGDDIAKATGDWKGLKITVKLIIQNRQATIEVVPSAASLIIKALKEPMRDRKKVKHVKHNGNLTFDEVMTIARTMRRSQARKLEGTVKEILGTCQSVGCTIDGANPHDVIDKINEGE----XXXXXXXXXXXXXXXXXXXXXXXXXXXXXXXXXXXXXXXXXXXXXXXXXXXXXXXXXXXXXXXXXXXXXXXXXXXXXXXXXXXXXXXXXXXXXXXXXXXXXXXXXXXXXXXXXXXXXXXXXXXXXXXXXXXXXXXXXXXXXXXXXXXXXXXXXXXXXXXXXXXXXXXXXXXXXXXXXXXXXXXXXXXXXXXXXXXXXXXXXXXX-VRYASEPENATKSCKARGSNLRVHFKNTRETAQAVKKMPLRRAQRYLKNVVGKKEIVPFRRFNGGVGRKAQAKQWGTQGRWPKKSAEFLLQLLRNAESNADYKGLDVDRLVIEHIQVNRAPKMRRRTYRAHGRINPYMSSPCHIEVILS---MKIELCAFSGYKIYPGHGKRMVKTDGKVYQFLNAKCEASHLMKRNPRKITWTVLYRRKHKKGLEEETTKKRTRRTAKFQRAIVGASLSDIMAKRNMKPEVRKAQREQ---RKIRTAVQFRRPHTLKLPRRPKYQRKSVPRRSRLDHFAIIKHPLTTESAMKKIEDNNTLVFIVHLRANKPQIKNAVKKLYEIDVQKVNTLIRPDGQKKAYVRLAPDYDALDVANKIGIISHRKFSAPRHGSMGFVPKKRSKRHRGKVKAFPKDDPSKPVHLTAFIGYKAGMTHIVREVDKPGSKVNKKEVVEAVTILEAPPMVVVGVVGYIDTPKGLRAFKTIWAEHLSEDCRRRFYKNYKSKKKAFTKNTKKWLDEQGRAEIEKDFKKMKKYSKVIRVIAHTQMKLMRKRQKKAHIMEIQLNGGTIADKIKWAREHMEKNMAVEKVFSQDEMIDVIGVTKGKGFKGVTSRWHTKKLPRKTHKGLRKVACIGAWHPSRVQFTVARAGQKGYHHRTEINKKIYRIGQGKVIKNNAATDYDVTEKTITPMGGFPHYGEVNCDYVMLKGCIMGPKKRVITLRKSLLTHTKRTALEKIKLKFIDTSSKFGHGRFQTAAEKKSALSEVVTREYTIHLHKRLHGVGFKKRAPRAIKEIKKFAEKQMGTIDVRVEARLNKFIWSKGVRNVPYRVRVRLARRRSEDEDSPNKLYTLVTHVSVTTFKGLQTENVD----------RHQSDRYHKLKPNWRKPKGIDNRARRRFKGQILMPNIGYGSAKKTKHVLPNGFKKVVVNNMREMEMLMMSNRRFCAEIAHGVSSKKRKILVERAKQLAIRVTNASARLRAEENEKGHKVTRPSRRKGKHTRFIRDIVREVTGFAPYEKRAMELLRVSKDKRALKFIKKRLGTHLRGKKKRDELSNVLVAQRKXXXXXXXXXXXXXXXXXXXXXXXXXXXXXXXXXXXXXXXXXXXXXXXXXXXXXXXXXXXXXXXXXXXXXXXXXXXXXXXXXXXXXXXXXXXXXXXXXXXXXXXXXXXXXXXXXXXXXXXXXXXXXXXXXXXXDRSTWKSNYFVKLIQLIDEYPKCFIVGVDNVGSRQMQQIRQSLRKDAVLLMGKNTMIRKAVRGHLENNPALERMLPYIKGNVGFVFTKEDLTDIRDKILDNKVKAPARAGALAPCDVKIPPQNTGLGPEKTSFFQALQIATKISKGTIEILNEIHLIKKEDRVGASEATLLNMLNVSPFSYGLKIQQVYDSGTVFSPEILDITSDDLRAKFLEGVANVASVSLAIGYPTLASVPHSIINGLKNLIAVAVSTDFKEADTAKEWLKDPSKFIDPFSRKDWYDVKAPALFTVRTIGKTLVNRTQGTKIASEGLKGRVFEVSLADLQNDEVACRKFRLIAEEVQGRNVLTNFHGMDLTTDKLRSMVKKWQTLIEANVDVKTTDGYLLRMFCIGFTKKQVKKTCYAQHTQVRAIRKKMTEMMVREVSSTDLKEVVNKLIPDSIGRDIEKACQGIYPLHDVMIRKVKVLKKPKFELGKLLELHGPEGYEPPVQENVMLMPKKNRTAVYEYLFKEGVLVAKKDFHAPKHVPNLHVIKAMQSLKSKGFVKEQFAWRHYYWYLTNEGIQYLRDFLHLPPEIVPSTLKEKSFQKQPTVFLNRKKSLRYVRNVGLGFKTPIDAIKGTYIDKKCPFTGNVSIRGRILRGIVIKMKMQRTIVIRRDYLHYIRKYNRFEKRHRNMSVHLSPAFRDVAVGDVVTIGECRALSKTVRFNVLKVTKHRIRITLTSKNVRSLEKVCSELIKGAKDKELKVKGPVRLPTEVLRITTRKTPCGEGSKTWDRFQMRIHKRVIDLHSPSEIVKQITSISIEPGVEVEVTIADTLRTRKFLSNRLLCRKQMVVDVLHPSKATVPKTEVREKLAKMYKTTPDVIFCFGFKTHFGGGKTTGFALIYDTLDYAKKFEPKYRLVR------------------------VRDKLNNLVLFDKATYDKLVKEVPSYKLITPSVVSERLKVRGSLARRALDELEKKGAIRQVIKHHSQVIYTRTTRGPKKHLKRLNAPKSWMLDKLGGVFAPRPSPGPHKLRESLPLVIMLRNRLKYALTCAEVKKIVMQRLIRVDGKVRTDTNYPAGFMDVITIEKTGEYIRLLYDVKGRFILHRISAEEAKYKLCKVKKVSLGPKGIPFLVTHDGRTIRYPHPEAKVNDSIQLDIGTGKIMDYIKFDSGNLCMVTGGHNLGRVGTITSRERHPGSFDIVHVKDAQGHTFATRLNYIFVIGKANKPHISLPRGKGIKLSVAEERDRRMKLNISYPASGSQKLIDIDDEKKIRVFYEKRMGHEVEADSLGDEWKGYVLRISGGNDKQGFPMKQGVLTASRVRLLLSKGHSCYRPRRTGERKRKSVRGCIVDSNLSVLSLVIIKKGEQEIPGLTDTTVPRRLGPKRASKIRKLFNLSKDDEVRQYIVRKPIPQKEGKKTKAPKIQRLVTPLMLQRKRXXXXXXXXXXXXXXXXXXXXXXXXXXXXXXXXXXXXXXXXXXXXXXXXXXXXXXXXXXXXXXXXXXXXXXXXXXXXXXXXXXXXXXXXXXXXXXXXXXXXXXXXXXXXXXXXXXXXXXXXXXXXXXXXXXXXXXXXXXXXXXXXXXXXXXXXXXXXXXXXXXXMGISRDHWHKRRRTGGKRKPLRKKRKFELGRPAANTKLGPKRIHTVRTRGGNKKYRALRLDHGNFAWASEHCTRKTRIIDVVYNASNNELVRTKTLVKNAIVLIDATPFRQWYEAHYALPLGRKKGAKLKRSKKTELKYKERQKSAKVEQALEEQFMTGRVLAGITSRPGQCGRSDGFILEGKELEFYLRKIKAKKLCDQVFDLLLEESNIQPVSTPVTVCGDIHGQFYDLEELFRTGGQVPDTNYIFLGDFVDRGYYSLETFTRLLTLKAKWPDRITLLRGNHESRQITQVYGFYDECQTKYGNASAWRHCCRVFDLLTVAAIVDEQVFCVHGGLSPEIKTLDQVRVIERNQEIPHKGAFCDLVWSDPEVETWAVSPRGAGWLFGAKVTHEFMHLNNLKLICRAHQLVHEGYKYMFDDKLVTVWSAPNYCYRCGNIAGKLIAVIGDEDTCVGFLLGGIGEMNKARQPNFLVVDKNTSISEIEDSFKSFLRRDDIDIILINQNIAEMIRHAIDAHPVPAVLEIPSKDQPYDPTKDSILRRAKGMFSAEDXXXXXXXXXXXXXXXXXXXXXXXXXXXXXXXXXXXXXXXXXXXXXXXXXXXXXXXXXXXXXXXXXXXXXXXXXXXXXXXXXXXXXXXXXXXXXXXXXXXXXXXXXXXXXXXXXXXXXXXXXXXXXXXXXXXXXXXXXXXXXXXXXXXXXXXXXXXXXXXXXXXXXXXXXXXXXXXXXXXXXXXXXXXXXXXXXXXXXXXXXXXXXXXXXXXXXXXXXXXXXXXXXXXXXXXXXXXXXXXXXXXXXXXXXXXXXXXXXXXXXXXXXXXXXXXXXXXXLVLVLGDLHVPHRCHNLPQKFKKLLVPGRIQHILCTGNLCTKESFDYLKTLASDVHVVRGDFDENYPEQKIVTVGQFRIGLCHGHQVVPWGDPDSLALVQRQLDVDILISGHTHRFEAYEHENKFYINPGSATGAYSPLPSFVLMDIQSSTVVTYVYQLIGDDVKVERIEYKKPAGDAEKGKKVFVQRCSQCHTVEKGGKHKTGPNLNGLIGRKTGQAVGFSYTDANKNKGITWGKDTLWIYLENPKKYIPGTKMVFAGIKKKPERADLISYLE---XXXXXXXXXXXXXXXXXXXXXXXXXXXXXXXXXXXXXXXXXXXXXXXXXXXXXXXXXXXXXXXXXXXXXXXXX--FADAIKQDGLIHIRIQQRNGRKTLTTVQGISGDFDKKKIVKACKKDFACNGTVVEHPEYGEVIQLQGDQRNNICQFLTKVGIAKPEQLKVHGF---------------------------------ISLQAMDNSHVSLVSLTLRSDGFEKFRCDRNLSMGMNLTSMAKILKCAANDDIITIKAQDDTVTLVFETTNQERISDYEMKLMNLDTEHLGIPDTDYSVIIKMPSSEFQRICRDLSQIGDSIQICCTKDGIRFSASGDLGTGNIKLSQTANADKEEESVIIEMQEAVTLTFALRYLNSFTKATPLSSQVQLSMSADVPLVVEYKIEDMGYIRYYLAPKIGYVFAVSGPVVTAEKMAGAAMYELVRVGHDELVGEIIRLEGDMATIQVYEETSGVTVGDPVLRTGKPLSVELGPGIMGSIFDGIQRPLQDINELTHSIYIPKGINVPSISRELKWDFRVGSHITGGDIYAIVFENTLVKHKLMLPPRAKGTITYIAEPGSYTVTDRILETEFDGEKTQYTMLQVWPVRQLRPVTEKLAANHPLMTGQRVLDSLFPCVQGGTTAIPGAFGCGKTVISQSLSKYSNSEVIVYVGCGERGNEMSEVLRDFPELTTEIDGHVESIMKRTALVANTSNMPVAAREASIYTGITLSEYFRDMGYNVSMMADSTSRWAEALREISGRLAEMPADSGYPAYLGARLASFYERAGRVKCLGNPEREGSVTIVGAVSPPGGDFSDPVTSATLGIVQVFWGLDKKLAQRKHFPSINWLISYSKYMRALDEYYEKAFPEFVAIRTKCSQILQEEEDLSEIVQLVGKASLAETDKITLEVAKLLKDDFLQQNGYTDYDRFCPFYKTVGMMKNMMAFYDLSQHAVEATAQSNRITWSKIRDAMGDILYQLSSMKFKDPAKEGEQKIRQDFEDLHENMQQAFRNLEDFPSRMAQTTMKARLKGAQKGHSLLKKKADALQLRFRMILKKIIETKQLMGQVMKEAVFSLAEAKFATGDFNQVVLQNVTKAQIKVRCKKDNVAGVNLPVFEGYQDGDTYELAGLARGGQQVAKLKKNYAKAVQLLIDLASLQTSFITLDEVIKITNRRVNAIEHVIIPRIERTLAYIISELDEREREEFYRLKKIQ--MPQNEHIELHRKRYGYRLDYHERKRKREGRQPHEVAEKAKKLRGIKAKIYNKQRFSEKVQMKKTLRMHEMKKNKAVPAYLLDREQSRAKILSNMIKQKRKEKAGKWDVPLPKVRGVSEAEVFKVLRTGKRRKKAWKRMVTKVCFVGDGFTRKPPKFERFIRPMGLRFKKAHVTHPELKATFSLPIIGVKKNPNSPLYTSLGVITKGTVIEVNISELGLVTQSGKVVWGKYAQVTNNPENDGCINSVLL
Tigriopus_japonicus            RRTGGDVRTQNVLAASTISNIVKSSLGPVGLDKMLVDDIGDVTITNDGATILQLLEVEHPAAKVLVELAQLQDEEVGDGTTSVVIVAAELLKNADELVKQKIHPTSIIAGYRLACKEAVKYIQEHLSYSVESLGTDCLINAAKTSMNSKLIGADSDFFAKMVVDAANAIKDGKGGHLYPIKAVNVLKAHGKSARESMLIEGYALNCTIAAQQMPRIVKNAKIACLDFSLQKAKMKMGIQVLVTDPTKLEAIRDREFDITKERIQKILDAGANVILTTGGIDDLCLKYFVEAKAMAVRRCKKVDLKRIAKATGATFVTSLANLEGEESFEASMLGEAASVAQERICDDELIIVRRTASSIILRGPNDFYCDEMERSIHDSLCVVKRVMESKNVVVGGGAVEAALSIYLENFATTLSSREQLAIAEFAKSLLVIPKTLAINAAQDASELVAKLRAYHNSSQTHADLKNCGLDLYEGAVKDNKKMGVFEPAISKVKSLKFATEAAITILRIDDLIKL--KPVEIRSSNIRAGKALADAVRTSLGPRGMDKMIQGPKGDVTITNDGATILEQMKVMHPSAKMLVNLSKAQDVEAGDGTTSVVVMAGSLLEAAEKLLKKGIHPTTISEAFQKAAVKSVEILMAVPVDLSDREKLLQAANTSLNSKVVSQHASELSPIAVDAVLKNVNLNDIKVIKKLGGTVDDTELVDGLVLNEKNVKKIEKAKIGLIQFQVSPPKTDMDNQVIVSDYAAMDRVLREERAYILNIVKQIKKAGCNVLLIQKSILRDALSDLAVHFFDKMKIMVVKDIEREDIEYVCKTLGCRPIASLDHFTAENLVSADLVEEGPSKYVKVTGIPHQTVSVIMRGSNKLVLEEADRSLHDALCVIRCLVKKKFLIAGGGAPETELYLKLTDYANTLIGADAYCFKAYAEALEVIPYTLAENAGLNPIATVTELRNRHALGETMSGINVRKGAITNILDENVVQPLLVSTSAINLASETVRSILKIDDIFDEFGRPFLILRDQGNQNRLTGKDAIKSHIMAARSISSTLRTSLGPKGLDKLMVSSDNDITITNDGATILKMMDVDHEVAKLMVQLSQSQDDEIGDGTTGVVVLCGALLEQAESLIDRGIHPIRIADGFELAAKCAVEHLDAVADKFEVDPKNENLIETAMTTLGSKIINKCHRQMAEIAVHAILSVADIERRDVNFELIKVEAKVGGRMEDSMLVKGVIVDKDFSHPQMPKQLKDVKLAILTCPFEPPKPKTKHKLDVTSVEDYRLLRKYELEKFDEMVKQVKDAGATLAICQWGFDDEANHLLLQRNLPAVRWVGGPEIELIAIATGGRIVPRFQELTADKLGKAGIVREMTFGTTKDRMLVIEECQNSKAVTIFLRGGTQMIIDEAKRSMHDALCVVRNLVRDSRVVYGGGASEISCALAVGKEADKIKTIEQYAFRAFADALEMIPMALAENSGLDPIRTITEIKAQQVAEKNPALGVDCMGAGSNDMRKAHVLETLHSKKSQILLATQLVKMILKIDDIRAKDVRFGSEVRKEMLVGVDILADAVSVTMGPKGRNVIIESSWGSPKITKDGVTVAKGIELADKFQNIGAKLVQDVANNTNEQAGDGTTTATVLARAIAKMGFDSVTHGANPVEIRRGLLAAVERVNQQLKDMSKHVTTPEEVYQVATISANGDGKLISDAMQKVGKEGVLTVKDGKTLHDEMEVIEGMKFDRGYISPYFINTTKGAKVEYNDALVLFSEKKISSIQSIIPALELANKRPLIIVAEDIDGEALTTLVVNRLKIGLQVAAVKAPGFGDNRKNTLQDMAIASGGVVFGSEGTDLKLEDIQAHDFGQVGEVSITKDDTLFLKGKGREDEIAKRVQQLKDQIEDSSSEYEKEKMQERMARLSSGVAVLKIGGSSEVEMNEKKDRVNDALCATRAAIEEGIVPGGGTALIRCIASLDDVKATNDDQKKGVDIVRYALTRPCYQIAKNAGVDASVIVNKVGYNAAENTFVNMIEAGIVDPTKVVRSALTDAAGVASLLTTAEAVITEI--YNFKRIAVVPMAKDFIDVILSKTQRKTPTVVHKQYKIGRIRAFYMRKVKFTQSNFNEKLTAILSEFPKLEEIHPFYSDLMNVLYDRDHYKLALGQINTARHLIDNVAKDYVRLLKYGDSLYRCKQLKRAALGRMATIMKKQAQSLSYLEEVRQHLSRLPSIDPNTRTILITGFPNVGKSSFINKITRADVEVQPYAFTTKSLYVGHTDHKYLRWQFIDTPGILDHPLEDRNTIEMQAITALAHLRAAVLYMMDPSEQCGYTLEAQQALFENIKPLFANKPLIVVANKADIWR-DDLDDDSVNRVKVTACDKLLQHRVEQKFQTKKRIHVAEPAKRDMDRPPCIPKTEREIELEMGDDYILDLNKKYEKYDVIPEFINGHNLADYIDPKEHVNIVFIGHVDAGKSTIGGQIQKLTGMVDARTLEKYEREAKEKNRETWYLSWCMDTNQEERDKGKTVEVGRAYFETEKKHFTILDAPGHKSFVPNMIGGAAQADLAVLVISARKGEFETGFERGGQTREHAMLVKTAGVKHLVVLVNKMDDPTVEWSEERYNYCKENLTPYLKKVGFNPAKDVNFMPVSGLTGSGLAPWFTGLSFIRFLDMVSFTRNVDGPFMMPICEKYSDMGAVVMGKVESGQCLKGQTLAIYPNRSDVKVDNLWSDDIEVTKVVCGENVKVKLKGVDEADISVGFVLCDPNNPIKSTKKFDAQIVVLDYPSIICSGKTFVLHLQAIIEEVTLKALICLVDKKTGEKSKTRPRFIKQDQIAIVRFVICMETFKDYPQLGRFTLRDEEIRGIMDKRNNIRNMSVIAHVDHGKSTLTDSLLAKAGIIAGAKAGETRATDTRKDEQERCITIKSTAISMYFEMEQKDLAFVGFLINLIDSPGHVDFSSEVTAALRVTDGALVVVDCVSGVCVQTETVLRQAIAERIRPVLFMNKMDRALLELQLEQEDLYQTFQRIVENVNVIIATYADGPMGVVRVDPANASVGFGSGLHGWAFTLKQFAEMYASKFGVKLMSKLWGENFFSPKTKKWRSFCMYILDPIYKFDAIMNKKDETDKLLDKLMKYEELQQEGKPLMKTVMRTWLPAGEAMFMMIVVHLPSPVTAQRYRAEMLYEGPKDDAACKACDPTGPLMMYISKMVPTTDKGRFYAFGRVFSGKIATGQKARIMGPNYIPGKKDDLYEKSIQRTILMMGRYIEAIEDVPCGNICGLVGVDQFLVKTGTITTCKEAHNLKVMKFSVSPVVRVAVEPKNPSDLPKLVEGLKRLAKSDPMVQCTIESSGEHIIAGAGELHLEICLKDLEEDHAQIPIKKSDPVVSYRETVAEESNQMCLSKSPNKHNRLFMKAVPMPEGLPEDIDNGVNPRDDFKTRGRYLADKYEYDITEARKIWCFGPETNGPNIMVDCSKGVQYLNEIKDSVVAGFQWATKEGVLCDENCRGIRFNIYDVTLHTDAIHRGGGQIIPTARRCLYACVLTAEPRLMEPVYLVEIQCPENAVGGIYGVLNRRRGHVFEESQVVGTPMFQVKAYLPVNESFGFTADLRSNTGGQAFPQCVFDHWQVMPGDPKPYQICQETKKRKGLKEALPDLGSYLDKMDAGSSSTFPMQCSALRKNGHVMIKNRPCKIVEMSTSKTGKHGHAKVHMVGLDIFSNKKYEDICPSTHNMDVPNISRRDYQLLDVSDDDYLSLMDGGNTRDDLKVPDGTVLMACGEEAVVATRTYDLNITYDKYYQTPRLWLFGYDEDKKALSMEQMYEDFSADHANKTITMETHPHLPGPPQASVHPCRHAQVMKKLIDQIMEGGGELGVHMYLIVFLKFVQAIIPTIEYDFMGRRPARCYRYCKNKPYPKSRFCRGVPDPKIRIYDLGRKKAGVDEFPLCVHLVSDEYEQLSAEALEAGRICCNKYMVKHTAKDQFHIRIRVHPFHVLRINKMLSCAGADRLQTGMRGAFGKPQGTVARVRIGQPLMSVRTYDKHKDAVIEALRRTKFKFPGRQKIYISKKWGFTKWDREDFEAMRANGRLVTDGVGVQYKPEHGPLFDEMNLREELLRGIYAYGFEKPSAIQQRAIVPCVKGLDVIAQAQSGTGKTATFSISILQQIDTSLAASQALILAPTRELAQQIQKVVMALGDYMGAQCHACIGGTSVREDMRKLDHIVVGTPGRVFDMISRKNLRTDDIKMFVLDEADEMLSRGFKDQIYDVFRHLQVVLLSATMPAEVLEVTTKFMRDPIRILVKKEELTLEGIRQFYVSVDREDWKLDTLCDLYETLTITQAVIFCNTRRKVDWLTDKMHERDFTVSAMHGDMDQKERDVIMREFRSGSSRVLITTDLLARGIDVQQVSLVINYDLPTNRENYIHRIGRGGRFGRKGVAINFVTDDDRRTLHDIEKFYNTRIVEMPMNVADLIFDNNAEVGVFSKLTNAYCLVGIGGSENFYSTFEAELDEVIPVVHASVGGCRILGRLTAGNRHGLLVPNSTTDQELQQLRNSLPDSVKVKRIEERLSALGNVVACNDYVALVHPDLDRETEEILADTLQVEVFRQTVAGNVLVGSYCALSNQGGLVHPRTSTTDQDELASLLQIPLVAGTVNRGSDVIGAGMVVNDWTAFCGQETTSTEISVIESVFKLSIAPSIFGSKDIKKAIACLLFGGSRKVLPDGLTRRGDINVLMLGDPGTAKSQLLKFVERVAPIAVYTSGKGSSAAGLTASVMRDPTSRNFVVEGGAMVLADGGVVCIDEFDKMREDDRVAIHEAMEQQTISIAKAGITTTLNSRCSVLAAANSIFGRWDDSKAEENIDFMPTILSRFDCIFIVKDEHCGPRLSMEAGEKLKAKYVQMRNSTKELEDETQKRLAIPITVRQLEAVIRLSESLAKMELQPFATERHVDEALRIFQVSTMDAAMSGNLSGAEGFTTQEDQELISRIEKQLKKRFAIGSQVSEHSILQDFAKQKYPEKAVQKVIQFMIRRGELQHRMQRKLLYRLQKAIDLVTKATEEDKRKNYAEALKLYEHAVEYFLHAIKYETNSEKAKTSIRSKCVQYLERAEKLKKKMMSKLDGAIVMEKPNVQWSDVAGLDLAKEALKEAVILPIKFPHLFQGKRTPWKGILLYGPPGTGKSYLAKAVATEANNSTFFSISSSDLISKWQGESEKMVRNLFEKAYESRPSIIFIDEVDSLVSTRSDGENDATKRVKTEFLVRMQGVGNNTDGVLVLGATNIPWALDSAIRRRFEKRIYIGLPDAMARATMFKIHLGTKTTLLGQQSERYSGADIQIVVRDALMQPVRKVQQATHFKKVTAPDRDNPHIMRDDYLVPCSPGSPGAMELTWMEIDGDKLLDPPVTMKDMMMSLAASKPSVNDDDIEKMTKFTSDFGQEGRKVPVPAHRYTPLKENWLKIFTPIVEHLHLQVRFNLKSRNVEIRATPETDDGHLQKAADFVRAFIYGFEVEDALALLRLEDLFLDSFEVTDVKELKGDHLSRAIGRLAGKGGRTKYTIENVTKTRIVLADSKIHILGSFQNIQIARALCNLILGSPPSKVYGINTPTNQKLLTNVAVVRMKKAGKRFEIACYKNKVLSWRQGVEKDIDEVLQAQTVFINVSKGQVAKKDDLLKAFEADQLEICKLLLDKGDLQVSDKERQAQQEAVFKDMAAIIAEKCLNPDNQRPYPTSLIEKAMKECHIAVKPNRGAKQQALEVIGKLKMFLTRSEYDRSVNTFSPEGRLFQVEYAIEAIKLGSTALGIQTSEGVVLAVEKRITSPLMEPTSLEKIVEVDRHLALAFSGLAADSKMLIERARTECQNHWFTYDETMRIESVAQSVSNLAIQFGNADQGGLSRPFGVSLLFAENGPVLYHLDPSGTYVQFEAKAIGSGSEGAQQSLQEVYHKSMTLREAIKSGMTILKQVMEEKLNDTNVEYDRAITVFSPDGHLFQVEYAQEAVKKGSTAVGVRGNDVVVLGVEKKAVAKLQEERTVQKICLLDDHVMLAFAGLTADARILINQGRVECQSHKLTVEDPVTLEYITRHVAGVKQKYTQSSGRRPFGISCLLTGFDYDGPHLYQTDPAGIYSEWKANAIGRSAKTVREFLEKNYNAEVAAKEDDTIKLAIKALLEVVQQGGKNLEVAVMRYDSRTTMFSPEGRLYQVEYAMEAIGHAGTCLGILAQDGILLAAERRNTNKLLDEVFHSEKIYHLHDDMACSVAGITSDANVLTKELRLIGQRYYYKYGESMPCEQLVSHLCDIKQAYTQYGGKRPFGVSILYIGWDKELGYQLYQSDPSGNYSGWKATCIGNNASAAVSQLKQEYKEGEMTLKDALDLAVKVLSKTLDMTKLTPDKIEIATLSRYSFSLTTFSPSGKLVQIEYALAAVASGAASVGIKAVNGVVLATEKKHKSILYEDHSTYKIEKVTDHIGMVYSGMGPDYRLLVRRARKMAQDYLLMYGETIPTSQLVQRVANVMQEYTQSGGVRPFGVSLLIAGWSPILFQCDPSGAYFAWKATAMGKNYVNGKTFLEKRYDDKLELEDAVHTAILTLKEGFEGQMTEDNVEIGICGFRRFTPEEVKDAGFDHYITIFSPEGRLYQVEYAFKAINSTGTTSVAVKGAETSAVATLRKVPDKLIDASSVTSLYAITDTIGCVMTGMVADAKNQVQRARYEAASFKYKFGYDMPVDVLCRKIADICQVYTQNAEMRPLGCAMILIAYDEDGPCVYKSDPAGYFCAFKACSVGAKQTEANSFLEKKLKKKETIQTAINCLSTILSADFKPSEIEVAVVSKDQPKFTILNE-----TSELACVYAALILADDDVAITGEKIQTILKAAKVDVEPFWPGLFAKALESCNVKELITNVGSSKVSKETLYECVTEVLKYAKKRKFVESIDLQIGLKNYDPQKDKRFSGTVKLRHVPRPKFSVCIFGDQQHCDEATAKGIPSMSADDLKKLNKQKKLVKKLAKKYDAFLASESLIKQIPRLLGPGLNKAGKFPALLTHGDNMKINDLKGTIKFQMKKVLCLNVAVGNIEMTEDELVQNIHLAVNFLVSLLKKHWQNVRSLYIKSTMGPAQRLYMPPKFDPNETKVVCLRAVGGEVAATSALAPKVGPLGLSPKKIGDDIAKATQDWKGLKVTVQLTIQNRQAKVSVVPSAAALIIKALKEPPRDRKKVKNIKHNGNITMDDIMNAARTMRRSMSKELSGVVKEILGTAQSVGCTVDGMNPHDIIDQINDGS----MGAYKYMSELYRKKQSDVLRYLLRVRCWQYRQLTKVHRAPRSTRPDKARRLGYKNKQGYVIYRIAMRRGGRKRPVAKGCPYGKPKTSGVKQQKPERNLQSIAEERVGRRLKGLRVLSSYWVGQDSTYKYYEVIMIDPAHKAIRRDPKINWIIRPVMKHRELRGLTAAGKRSRGLGHGRKFNQTKGGSRRACWLRRNSYKMHRKRMGRYASEPDNAAKSAKAKGSNLRVHFKNTRETAQAIKKLPLNRAVTYLKNVITQKEIVPFRRFRGGVGRHAQAKAFKDQGRWPKKSAEFLLHLLKNAESNAEHKGLDADHLVIDHIQVNRAPYMRRRTYRAHGRINPYMSSPCHIEVCLVEKEMRIELCSYSGYKVYPGRGRTMVRADGKSYKFLDNRCHKAHLLKRNPRKVTWTVLYRRKHKKGIEEETTKKRTKKSQKFQRAVVGATLQDILAKRNQKPEVRKAQREQAIRKKVRTTVHFKRPQTFRPARQPKFPRKAIPKRNRMDAYNIIKHPLTTESAMKKIEDNNTLVFICNIKANKHQIKASVKKLYDINVAKVNTLIRPDGQKKAYVRLAPDYDALDVANKIGIISHRKFSAPRHGSMGFYPKKRSKTHRGKAKAFPKDDPSKPVHLTCFLGYKAGMTHVVRESDRPGSKMNKREIVEAVTIIETPPMIAVGVVGYIETPRGLRALKTVWAEHISEECKRRFYKNSKSKKKAFTKACKKWQEDLGKKEIEKELNQIKKYCSVVRIICHTQQKLLRRRQKKAHIMEIQLNGGSVADKVDFARNHFEKEIRCNSVFARDEMIDCIGVTKGKGFKGVTSRWHTKKLPRKTHKGLRKVACIGAWHPSRIQFTVARAGQKGYHHRTEINKKIYDMRDGKLIKNNASTDYDLADKSINPMGGFPHYGEVKQDFIMIKGCCIGPKKRVLTLRKSLLVHTKRLALEKIKLKFIDTSSKFGHGRFQTPQDK-STMGEVVTREYTINLHKRLHGIGFKYRAPRAIKEVKKFAEKQMGTTDVRVDTRLNKHLWSQGVRNVPFRIRVRLARLRNEDEDAANKLYTLVTHVNVATFKGLQTENVEIVKKRTKRFLRHQSDRYVKVRQSWRKPKGIDNRVRRKFKGMYLMPNIGYGSNKNTRHMLPTGFRKVLINNMKELEVLMMQNKKFCAEIAHGVSAKNRKALVERAQQLCIRVTNPNARLRSEENEKGHKTTRPAKAKGNHTKFVRDLVREVTGFSPYERRAMELLRISKDKRCLKFLKKRIGNHIRAKRKREEMSNV------XXXXXXXXXXXXXXXXXXXXXXXXXXXXXXXXXXXXXXXXXXXXXXXXXXXXXXXXXXXXXXXXXXXXXXXXXXXXXXXXXMSALKTFRIKTKLAKKLKQNRPIPQWIRMKTGNTIRYNSKRRHWRRTKLKLDKASWKANYFLKLVQLFDEYPKCFLVEADNVGSKQMQQIRMMLRGRAVILMGKNTMMRKAIRGHLEQNPALEKLLPHIRGNVGFVFTKDDLGSIRDALLSNKVKAPARAGAIAPLDVIVPAQNTGLGPEKTSFFQALNIPTKITKGTIEIVQDVNLLKTGDKVGLSDATLLNMLNISPFNYGLIVIQVYDSGTIFDPKILDITDADLKAMFARGVANVAAVSMKIKYPNMASAPHMMVNGLKNLLSVAAVTDFKEAEMLKAFLADPSKFVDPFTRKDWYDIKAPSIFKVRDVGKTLVNRTQGTRIASDGLKGRVYEVSLADLQNEERSYRKFSLICEEVQGKNCLTTFHSSTLTTDKLRSMVKKWQTLIEAHTDVKTTDGYLLRLFCIGFTQRQRSKTCYAQSQKIRQIRKKMVDIMQREVAAGDLKEVVNKLIPDSIAADISKACQGIFPLHDVHIRKVKVLKKPRFDLSKLMDLHGPDGFEPPVLDSVMLMPKKNRVAIYEHLFKEGVMVAMKDVHAPKHVPNLQVIKTLTSLKSRGYVKEQFAWRHYYWYLTNEGIHYLREFLNLPPEIVPSTLKERSFQRQPTVFQNEKGLKRYMRNVGLGFKPPAEAREGSYIDKKCPFTGKISIRGRVLTGVITKMKMNRTVVIRRDYLHYIKKYNRFEKRHKNMSVHLSPCFRDVQVGDVLTVGECRPLSKTVRFNTLKVTKHRIRITLTSRNVKSLEKVCHDLIRGAKDKDLKVKGPVRMPTKILRITTRKTPCGEGSKTWDRFQMRIHKRVIDLQSPSEIVKQITSISIEPGVEVEVTIADTVRTRKYMTNRLLARKQMVVDVLHPNKASVPKTEIREKLAKMYKCTPDRVVAFGFRTNFGGGKSSGFALIYETMDFAKKFEPKFRLIRQGVLE--------------------RDKLNNLVLFDQGTYDKMLKEVPTYKLITPSIVSERMKVRGSLARKALTELVQKGLIRQVVQHSAQTIYTR--RGPKKHMKRLSAPKTWMLDKLGGVFTTRPSSGPHKLRESMPIAIFLRNRLKYALTSKEVMSIMKQRLIKIDGKVRTDHKFPAGFMDVIQIEKTGENFRLVYDVKGRFTIHRITDQEAKYKLCRVKAVKTGPKNVPYLYTSDGRTIRYPDPVVKVNDSIRVDINTNKIMDFIKFEAGNLCMVTGGRNTGRVGTIMHRERHPGSFDIVHVKDANGHTFATRLAYIFVIGKGSKPYISLPKGGGVKLTIAEERDKRMKINVAYPATGRQKLFEVNDEIKVRPFYEKRMGQEVDGATLGDEWKGYLLRVTGGNDKQGFPMMQGVLTTSRVRLLLNKNHSCYRQRKSGERKRKSVRGCIVDANMSVISVIIVRKGEQDIPGLTDSTLPNRLGPKRASKIRKFYNLSKEDNVCQYVIKRPIPGKDGKRTKAPKIQRLVTP-------DEFEKSISQALLDLEINSDLKAQLRELHITAAKEKKAIVIFVPVPQLKAFQKVQSRLVRELEKKFSGRHVVLIAQRRILPKPTRKLKQKRPRSRTLMAVHSAILDDLVYPAEIVGKRIRIRLDGSRLFKVHLDKTQQTNIEHKTDTFAAVYKKLTGKEVTFEFMGISRDHWHKRRATGGKRAPIRGKRKFELARPAAMTKLGPQRIHTVRVRGGNKKYRALRLDTGNFSWASESIARKTRIIDIVYNACNNELVRTKTLVKNAIVIIDATPFRQWYEAHYALPLGHKKGQKSNKSKKTQKKYLERQKVGKIEQGIEDQFVSGRVLASISSRPGQCGRADGYILEGKELEFYLRKIKAKKLCSKAREILVEESNVQRVDSPVTVCGDIHGQFYDLKELFKVGGNVPDTNYLFMGDFVDRGFYSVETFLLLLALKVRYPDRITLIRGNHESRQITQVYGFYDECLRKYGTITVWRYCTEIFDYLSLSAIIDGKIFCVHGGLSPSIQNLDQIRTIDRKQEVPHDGPMCDLLWSDPETQGWGVSPRGAGYLFGSDVVAQFNQANDIEMICRAHQLVMEGYKWHFNATVLTVWSAPNYCYRCGNVAGKLIGVIGDEDTCVGFLLGGIGEMNKNRHPNFMVVDKNTPITDIEECLKTFIKRDDVDIILINQNIAEMIRHTIDQHPVPAILEIPSKDHPYDPSKDSILRRAKGMFS---DPAIRIWVFLPIVLITFLVGIVRHYVSVLLTSTKDSQLLIRSRMLRENAKFLPKQSFLMRRHHLNNEDKGILKNQNPMTDPSMMTDMLKGNLTNVLPMIVIGGWINWHFSGFVTTKVPFPLTLRFKPMLQRGIELMSLDASWVSSASWYFLNVFGLRSIYALVLGENNSADQSRVMQDQMSMQAGGMPQDPXXXXXXXXXXXXXXXXXXXXXXXXXXXXXXXXXXXXXXXXXXXXXXXXXXXXXXXXXXXXXXXXXXXXXXXXXXXXXXXXXXXXXLVLVLGDLHIPHRSSALPSKFKKLLVPGRIQHILCTGNLCTKDSFDYLKTLASDVHVVRGDFDENWPEQKVISVGSFTIGLYHGHQLVPWGDPEALAMINRQLNCDILITGQTHKFEAYEQENRFYVNPGSITGSYSPVPSFILMDIQSNTVVTYVYQLIEDEVKVERIEFKK--GDIEKGKKIFVQKCTQCHTIEAGGKHKVGPNLHGMYGRQTGQAPGFNYTDANKSKGVTWNEETLDIYLTNPKKYIPGTKMVFAGLKKKGDRDDLIAYLKSASXXXXXXXXXXXXXXXXXXXXXXXXXXXXXXXXXXXXXXXXXXXXXXXXXXXXXXXXXXXXXXXXXXXXXXXXXDPFADAAKQDGLVHIRIQQRNGRKTLTTIQGLSAEYDLKKIVRACKKEFACNGTVVEHPEYGEVLQLQGDQRTKICDWLVKCGLVKADQLKVHGFFEARLVQGNLLKKVLESLKDLLTEASWDCADTGIQLQAMDNSHVSLVSVQLRADGFDKFRCDRQLSMGMNLTSMSKILRCAANDDIITIKAQDDNVTFVFESPNQEKVADYEMKLMNLDQEHLGIPETDYAAVIKLPAAEFQRIIKDLSQFGESVVISCTKEGVKFSAAGDIGVGNIKLAQTASVDKEEEAVTIEMQEPVTLTFACRYLNMFTKATCLAPQVTLSMSPEVPLVVEYKIGDMGHVRYYLAPKIGYVHAVSGPVVTAEKMSGSAMYELVRVGYYELVGEIIRLEGDFATIQVYEETSGVTVGDPVLRTGKPLSVQLGPGIMNAIFDGIQRPLKDINEMTESIYIPKGINTNALSITQEWDFKMGAHITGGDIYGMVQENTLIKHKMLLPPKAKGTVTYIAPPGNYTVRDKVLETEFDGQKTEYTLMQVWPVRQPRPVTEKLPANHPLLTGQRVLDGLFPAVQGGTTAIPGAFGCGKTVISQSLSKYSNSDVIIYVGCGERGNEMSEVLRDFPELTVEIDGKTESIMKRTSLVANTSNMPVAAREASIYTGITLSEYFRDMGYNVSMMADSTSRWAEALREISGRLAEMPADSGYPAYLGARLASFYERAGRVKCLGNPEREGSVSIVGAVSPPGGDFSDPVTSATLGIVQVFWGLDKKLAQRKHFPSVNWLISYSKYTRALDDYYEKNFPDFVALRTKVNEILQEEEDLSEIVQLVGKASLAETDKITLEVAKLLKDDFLQQNGYSPYDRYCPFYKTVGMLRNIVGFYDLARHSVESTAQSHKITWNVIREALGNVLYQLSSMKFKDPFKEGEAKIRADYDELYESMQTAFRNLEDFPSRGAQTMMKGRLKAAQKGHSLLKKKADALQLRFRAILKKIIDTKQTMGNVMKEAAFSLAEAKFACGDFSQPVLQNVNKAQLKIRTRKDNVAGVNLPVFESYQDGDSYELAGLSRGGQQITSLKKNYQKAVTLLVELASLQTSFITLDEVIKITNRRVNAIEHVIIPKIERTLAYIISELDELEREEFFRL------MPQNEHIELHRKRHGRRLDYEEKTRKKAAREPKKRAATAKKLRGLKAKLYNKKRFSEKVQLRKKIKAFEEKSTEAVPAYLLDRQKQTGKAIAAQVKQKQKDKAAKYNVPLPKVRMQSENEVFRPLKSGK-RGKSWKRMVTKVTYVPDDFTRKPPKFERFIRPTGLRFKKAHVTHPELRTTFCLPIIGVKRNPSSTMYTSLGVITKGTIIEVNISDLGMVTAGGKIVWGKYAQVTNNPENDGCINAILL
Echinoderes_horni              XXXXXXXXXXXXXXXXXXXXXXXXXXXXXXXXXXXXXXXXXXXXXXXXXXXXXXXXXXXXXXXXXXXXXXXXXXXXXXXXXXXXXXXXXXXXXXXXXXXXXXXXXXXXXXXXXXXXXXXXXXXXXXXXXXXXXXXXXXXXXXXXXXXXXXXXXXXXXXXXXXXXXXXXXXXXXXXXXXXXXXXXXXXXXXXXXXXXXXXXXXXXXXXXXXXXXXXXXXXXXXXXXXXXXXXXXXXXXXXXXXXXXXXXXXXXXXXXXXXXXXXXXXXXXXXXXXXXXXXXXXXXXXXXXXXXXXXXXXXXXXXXXXXXXXXXXXXXXXXXXXXXXXXXXXXXXXXXXXXXXXXXXXXXXXXXXXXXXXXXXXXXXXXXXXXXXXXXXXXXXXXXXXXXXXXXXXXXXXXXXXXXXXXXXXXXXXXXXXXXXXXXXXXXXXXXXXXXXXXXXXXXXXXXXXXXXXXXXXXXXXXXXXXXXXXXXXXXXXXXXXXXXXXXXXXXXXXXXXXXXXXXXXXXXXXXXXXXXXXXXXXXXXXXXXXXXXXXXXXXXXXXXXXXXXXXXXXXXXXXXXXXXXXXXXXXXXXXXXXXXXXXXXXXXXXXXXXXXXXXXXXXXXXXXXXXXXXXXXXXXXXXXXXXXXXXXXXXXXXXXXXXXXXXXXXXXXXXXXXXXXXXXXXXXXXXXXXXXXXXXXXXXXXXXXXXXXXXXXXXXXXXXXXXXXXXXXXXXXXXXXXXXXXXXXXXXXXXXXXXXXXXXXXXXXXXXXXXXXXXXXXXXXXXXXXXXXXXXXXXXXXXXXXXXXXXXXXXXXXXXXXXXXXXXXXXXXXXXXXXXXXXXXXXXXXXXXXXXXXXXXXXXXXXXXXXXXXXXXXXXXXXXXXXXXXXXXXXXXXXXXXXXXXXXXXXXXXXXXXXXXXXXXXXXXXXXXXXXXXXXXXXXXXXXXXXXXXXXXXXXXXXXXXXXXXXXXXXXXXXXXXXXXXXXXXXXXXXXXXXXXXXXXXXXXXXXXXXXXXXXXXXXXXXXXXXXXXXXXXXXXXXXXXXXXXXXXXXXXXXXXXXXXXXXXXXXXXXXXXXXXXXXXXXXXXXXXXXXXXXXXXXXXXXXXXXXXXXXXXXXXXXXXXXXXXXXXXXXXXXXXXXXXXXXXXXXXXXXXXXXXXXXXXXXXXXXXXXXXXXXXXXXXXXXXXXXXXXXXXXXXXXXXXXXXXXXXXXXXXXXXXXXXXXXXXXXXXXXXXXXXXXXXXXXXXXXXXXXXXXXXXXXXXXXXXXXXXXXXXXXXXXXXXXXXXXXXXXXXXXXXXXXXXXXXXXXXXXXXXXXXXXXXXXXXXXXXXXXXXXXXXXXXXXXXXXXXXXXXXXXXXXXXXXXXXXXXXXXXXXXXXXXXXXXXXXXXXXXXXXXXXXXXXXXXXXXXXXXXXXXXXXXXXXXXXXXXXXXXXXXXXXXXXXXXXXXXXXXXXXXXXXXXXXXXXXXXXXXXXXXXXXXXXXXXXXXXXXXXXXXXXXXXXXXXXXXXXXXXXXXXXXXXXXXXXXXXXXXXXXXXXXXXXXXXXXXXXXXXXXXXXXXXXXXXXXXXXXXXXXXXXXXXXXXXXXXXXXXXXXXXXXXXXXXXXXXXXXXXXXXXXXXXXXXXXXXXXXXXXXXXXXXXXXXXXXXXXXXXXXXXXXXXXXXXXXXXXXXXXXXXXXXXXXXXXXXXXXXXXXXXXXXXXXXXXXXXXXXXXXXXXXXXXXXXXXXXXXXXXXXXXXXXXXXXXXXXXXXXXXXXXXXXXXXXXXXXXXXXXXXXXXXXXXXXXXXXXXXXXXXXXXXXXXXXXXXXXXXXXXXXXXXXXXXXXXXXXXXXXXXXXXXXXXXXXXXXXXXXXXXXXXXXXXXXXXXXXXXXXXXXXXXXXXXXXXXXXXXXXXXXXXXXXXXXXXXXXXXXXXXXXXXXXXXXXXXXXXXXXXXXXXXXXXXXXXXXXXXXXXXXXXXXXXXXXXXXXXXXXXXXXXXXXXXXXXXXXXXXXXXXXXXXXXXXXXXXXXXXXXXXXXXXXXXXXXXXXXXXXXXXXXXXXXXXXXXXXXXXXXXXXXXXXXXXXXXXXXXXXXXXXXXXXXXXXXXXXXXXXXXXXXXXXXXXXXXXXXXXXXXXXXXXXXXXXXXXXXXXXXXXXXXXXXXXXXXXXXXXXXXXXXXXXXXXXXXXXXXXXXXXXXXXXXXXXXXXXXXXXXXXXXXXXXXXXXXXXXXXXXXXXXXXXXXXXXXXXXXXXXXXXXXXXXXXXXXXXXXXXXXXXXXXXXXXXXXXXXXXXXXXXXXXXXXXXXXXXXXXXXXXXXXXXXXXXXXXXXXXXXXXXXXXXXXXXXXXXXXXXXXXXXXXXXXXXXXXXXXXXXXXXXXXXXXXXXXXXXXXXXXXXXXXXXXXXXXXXXXXXXXXXXXXXXXXXXXXXXXXXXXXXXXXXXXXXXXXXXXXXXXXXXXXXXXXXXXXXXXXXXXXXXXXXXXXXXXXXXXXXXXXXXXXXXXXXXXXXXXXXXXXXXXXXXXXXXXXXXXXXXXXXXXXXXXXXXXXXXXXXXXXXXXXXXXXXXXXXXXXXXXXXXXXXXXXXXXXXXXXXXXXXXXXXXXXXXXXXXXXXXXXXXXXXXXXXXXXXXXXXXXXXXXXXXXXXXXXXXXXXXXXXXXXXXXXXXXXXXXXXXXXXXXXXXXXXXXXXXXXXXXXXXXXXXXXXXXXXXXXXXXXXXXXXXXXXXXXXXXXXXXXXXXXXXXXXXXXXXXXXXXXXXXXXXXXXXXXXXXXXXXXXXXXXXXXXXXXXXXXXXXXXXXXXXXXXXXXXXXXXXXXXXXXXXXXXXXXXXXXXXXXXXXXXXXXXXXXXXXXXXXXXXXXXXXXXXXXXXXXXXXXXXXXXXXXXXXXXXXXXXXXXXXXXXXXXXXXXXXXXXXXXXXXXXXXXXXXXXXXXXXXXXXXXXXXXXXXXXXXXXXXXXXXXXXXXXXXXXXXXXXXXXXXXXXXXXXXXXXXXXXXXXXXXXXXXXXXXXXXXXXXXXXXXXXXXXXXXXXXXXXXXXXXXXXXXXXXXXXXXXXXXXXXXXXXXXXXXXXXXXXXXXXXXXXXXXXXXXXXXXXXXXXXXXXXXXXXXXXXXXXXXXXXXXXXXXXXXXXXXXXXXXXXXXXXXXXXXXXXXXXXXXXXXXXXXXXXXXXXXXXXXXXXXXXXXXXXXXXXXXXXXXXXXXXXXXXXXXXXXXXXXXXXXXXXXXXXXXXXXXXXXXXXXXXXXXXXXXXXXXXXXXXXXXXXXXXXXXXXXXXXXXXXXXXXXXXXXXXXXXXXXXXXXXXXXXXXXXXXXXXXXXXXXXXXXXXXXXXXXXXXXXXXXXXXXXXXXXXXXXXXXXXXXXXXXXXXXXXXXXXXXXXXXXXXXXXXXXXXXXXXXXXXXXXXXXXXXXXXXXXXXXXXXXXXXXXXXXXXXXXXXXXXXXXXXXXXXXXXXXXXXXXXXXXXXXXXXXXXXXXXXXXXXXXXXXXXXXXXXXXXXXXXXXXXXXXXXXXXXXXXXXXXXXXXXXXXXXXXXXXXXXXXXXXXXXXXXXXXXXXXXXXXXXXXXXXXXXXXXXXXXXXXXXXXXXXXXXXXXXXXXXXXXXXXXXXXXXXXXXXXXXXXXXXXXXXXXXXXXXXXXXXXXXXXXXXXXXXXXXXXXXXXXXXXXXXXXXXXXXXXXXXXXXXXXXXXXXXXXXXXXXXXXXXXXXXXXXXXXXXXXXXXXXXXXXXXXXXXXXXXXXXXXXXXXXXXXXXXXXXXXXXXXXXXXXXXXXXXXXXXXXXXXXXXXXXXXXXXXXXXXXXXXXXXXXXXXXXXXXXXXXXXXXXXXXXXXXXXXXXXXXXXXXXXXXXXXXXXXXXXXXXXXXXXXXXXXXXXXXXXXXXXXXXXXXXXXXXXXXXXXXXXXXXXXXXXXXXXXXXXXXXXXXXXXXXXXXXXXXXXXXXXXXXXXXXXXXXXXXXXXXXXXXXXXXXXXXXXXXXXXXXXXXXXXXXXXXXXXXXXXXXXXXXXXXXXXXXXXXXXXXXXXXXXXXXXXXXXXXXXXXXXXXXXXXXXXXXXXXXXXXXXXXXXXXXXXXXXXXXXXXXXXXXXXXXXXXXXXXXXXXXXXXXXXXXXXXXXXXXXXXXXXXXXXXXXXXXXXXXXXXXXXXXXXXXXXXXXXXXXXXXXXXXXXXXXXXXXXXXXXXXXXXXXXXXXXXXXXXXXXXXXXXXXXXXXXXXXXXXXXXXXXXXXXXXXXXXXXXXXXXXXXXXXXXXXXXXXXXXXXXXXXXXXXXXXXXXXXXXXXXXXXXXXXXXXXXXXXXXXXXXXXXXXXXXXXXXXXXXXXXXXXXXXXXXXXXXXXXXXXXXXXXXXXXXXXXXXXXXXXXXXXXXXXXXXXXXXXXXXXXXXXXXXXXXXXXXXXXXXXXXXXXXXXXXXXXXXXXXXXXXXXXXXXXXXXXXXXXXXXXXXXXXXXXXXXXXXXXXXXXXXXXXXXXXXXXXXXXXXXXXXXXXXXXXXXXXXXXXXXXXXXXXXXXXXXXXXXXXXXXXXXXXXXXXXXXXXXXXXXXXXXXXXXXXXXXXXXXXXXXXXXXXXXXXXXXXXXXXXXXXXXXXXXXXXXXXXXXXXXXXXXXXXXXXXXXXXXXXXXXXXXXXXXXXXXXXXXXXXXXXXXXXXXXXXXXXXXXXXXXXXXXXXXXXXXXXXXXXXXXXXXXXXXXXXXXXXXXXXXXXXXXXXXXXXXXXXXXXXXXXXXXXXXXXXXXXXXXXXXXXXXXXXXXXXXXXXXXXXXXXXXXXXXXXXXXXXXXXXXXXXXXXXXXXXXXXXXXXXXXXXXXXXXXXXXXXXXXXXXXXXXXXXXXXXXXXXXXXXXXXXXXXXXXXXXXXXXXXXXXXXXXXXXXXXXXXXXXXXXXXXXXXXXXXXXXXXXXXXXXXXXXXXXXXXXXXXXXXXXXXXXXXXXXXXXXXXXXXXXXXXXXXXXXXXXXXXXXXXXXXXXXXXXXXXXXXXXXXXXXXXXXXXXXXXXXXXXXXXXXXXXXXXXXXXXXXXXXXXXXXXXXXXXXXXXXXXXXXXXXXXXXXXXXXXXXXXXXXXXXXXXXXXXXXXXXXXXXXXXXXXXXXXXXXXXXXXXXXXXXXXXXXXXXXXXXXXXXXXXXXXXXXXXXXXXXXXXXXXXXXXXXXXXXXXXXXXXXXXXXXXXXXXXXXXXXXXXXXXXXXXXXXXXXXXXXXXXXXXXXXXXXXXXXXXXXXXXXXXXXXXXXXXXXXXXXXXXXXXXXXXXXXXXXXXXXXXXXXXXXXXXXXXXXXXXXXXXXXXXXXXXXXXXXXXXXXXXXXXXXXXXXXXXXXXXXXXXXXXXXXXXXXXXXXXXXXXXXXXXXXXXXXXXXXXXXXXXXXXXXXXXXXXXXXXXXXXXXXXXXXXXXXXXXXXXXXXXXXXXXXXXXXXXXXXXXXXXXXXXXXXXXXXXXXXXXXXXXXXXXXXXXXXXXXXXXXXXXXXXXXXXXXXXXXXXXXXXXXXXXXXXXXXXXXXXXXXXXXXXXXXXXXXXXXXXXXXXXXXXXXXXXXXXXXXXXXXXXXXXXXXXXXXXXXXXXXXXXXXXXXXXXXXXXXXXXXXXXXXXXXXXXXXXXXXXXXXXXXXXXXXXXXXXXXXXXXXXXXXXXXXXXXXXXXXXXXXXXXXXXXXXXXXXXXXXXXXXXXXXXXXXXXXXXXXXXXXXXXXXXXXXXXXXXXXXXXXXXXXXXXXXXXXXXXXXXXXXXXXXXXXXXXXXXXXXXXXXXXXXXXXXXXXXXXXXXXXXXXXXXXXXXXXXXXXXXXXXXXXXXXXXXXXXXXXXXXXXXXXXXXXXXXXXXXXXXXXXXXXXXXXXXXXXXXXXXXXXXXXXXXXXXXXXXXXXXXXXXXXXXXXXXXXXXXXXXXXXXXXXXXXXXXXXXXXXXXXXXXXXXXXXXXXXXXXXXXXXXXXXXXXXXXXXXXXXXXXXXXXXXXXXXXXXXXXXXXXXXXXXXXXXXXXXXXXXXXXXXXXXXXXXXXXXXXXXXXXXXXXXXXXXXXXXXXXXXXXXXXXXXXXXXXXXXXXXXXXXXXXXXXXXXXXXXXXXXXXXXXXXXXXXXXXXXXXXXXXXXXXXXXXXXXXXXXXXXXXXXXXXXXXXXXXXXXXXXXXXXXXXXXXXXXXXXXXXXXXXXXXXXXXXXXXXXXXXXXXXXXXXXXXXXXXXXXXXXXXXXXXXXXXXXXXXXXXXXXXXXXXXXXXXXXXXXXXXXXXXXXXXXXXXXXXXXXXXXXXXXXXXXXXXXXXXXXXXXXXXXXXXXXXXXXXXXXXXXXXXXXXXXXXXXXXXXXXXXXXXXXXXXXXXXXXXXXXXXXXXXXXXXXXXXXXXXXXXXXXXXXXXXXXXXXXXXXXXXXXXXXXXXXXXXXXXXXXXXXXXXXXXXXXXXXXXXXXXXXXXXXXXXXXXXXXXXXXXXXXXXXXXXXXXXXXXXXXXXXXXXXXXXXXXXXXXXXXXXXXXXXXXXXXXXXXXXXXXXXXXXXXXXXXXXXXXXXXXXXXXXXXXXXXXXXXXXXXXXXXXXXXXXXXXXXXXXXXXXXXXXXXXXXXXXXXXXXXXXXXXXXXXXXXXXXXXXXXXXXXXXXXXXXXXXXXXXXXXXXXXXXXXXXXXXXXXXXXXXXXXXXXXXXXXXXXXXXXXXXXXXXXXXXXXXXXXXXXXXXXXXXXXXXXXXXXXXXXXXXXXXXXXXXXXXXXXXXXXXXXXXXXXXXXXXXXXXXXXXXXXXXXXXXXXXXXXXXXXXXXXXXXXXXXXXXXXXXXXXXXXXXXXXXXXXXXXXXXXXXXXXXXXXXXXXXXXXXXXXXXXXXXXXXXXXXXXXXXXXXXXXXXXXXXXXXXXXXXXXXXXXXXXXXXXXXXXXXXXXXXXXXXXXXXXXXXXXXXXXXXXXXXXXXXXXXXXXXXXXXXXXXXXXXXXXXXXXXXXXXXXXXXXXXXXXXXXXXXXXXXXXXXXXXXXXXXXXXXXXXXXXXXXXXXXXXXXXXXXXXXXXXXXXXXXXXXXXXXXXXXXXXXXXXXXXXXXXXXXXXXXXXXXXXXXXXXXXXXXXXXXXXXXXXXXXXXXXXXXXXXXXXXXXXXXXXXXXXXXXXXXXXXXXXXXXXXXXXXXMPPKFDPNEIKIIYLRAVGGEVAATSTLAPKIGPLGLSPKKVGDDIAKATADWKGLKVTVKLTVQNRQATITTVPSAASYVIKALKEPPRDRKKVKRVKHNGNITFDDILGIARNMRRSMAKDLSGTVKEVLGTAQSVGCTVDGMNPHDVIDKVNDGEYEVPXXXXXXXXXXXXXXXXXXXXXXXXXXXXXXXXXXXXXXXXXXXXXXXXXXXXXXXXXXXXXXXXXXXXXXXXXXXXXXXXXXXXXXXXXXXXXXXXXXXXXXXXXXXXXXXXXXXXXXXXXXXXXXXXXXXXXXXXXXXXXXXXXXXXXXXXXXXXXXXXXXXXXXXXXXXXXXXXXXXXXXXXXXXXXXXXXXXXXXXXXXXXMGKYSQDPDNPAKSCKARGSNLRVHFKNTRETAQAIKKMPLHRATKYLKNVVAKKEIVPFRRFCGGVGRKAQAKNWGTQGRWPKKSAEFLLQLLKNAESNAEYRGLDTDHLVIEHIQVNRAPHMRRRTYRAHGRINPYMSSPCHIEVILSEKEXXXXXXXXXXXXXXXXXXXXXXXXXXXXXXXXXXXXXXXXXXXXXXXXXXXXXXXXXXXXXXXXXXXXXXXXXXXXXXXXXXXXXXXXXXXXXXXXXXXXXXXXXXXXXXXXXXXXXXXXXXXXXXXXXXXXXXXXXXXXXXXXXXXXXXXXXXXXXXXXXXXXXXXXXXXXXXXXXXXXXXXXXXXXXXXXXXXXXXXXXXXXXXXXXXXXXXXXXXXXXXXXXXXXXXXXXXXXXXXXXXXXXXXXXXXXXXXXXXXXXXXXXXXXXXXXXXXXXXXXXXXXXXXXXXXXXXXXXXXXXXXXXXXXXXXXXXXXXXXXXXXXXXXXXXXXXXXXXXXXXXXXXXXXXXXXXXXXXXXXXXXXXXXXXXXXXXXXXXXXXXXXXXXXXXXXXXXXXXXXXXXXXXXXXXXXXXXXXXXXXXXXXXXXXXXXXXXXXXXXXXXXXXXXXXXXXXXXXXXXXXXXXXXXXXXXXXXXXXXXXXXXXXXXXXXXXXXXXXXXXXXXXXXXXXXXXXXXXXXXXXXXXXXXXXXXXXXXXXXXXXXXXXXXXXXXXXXXXXXXXXXXXXXXXXXXXXXXXXXXXXXXXXXXXXXXXXXXXXXXXXXXXXXXXXXXXXXXXXXXXXXXXXXXXXXXXXXXXXXXXXXXXXXXXXXXXXXXXXXXXXXXXXXXXXXXXXXXXXXXXXXXXXXXXXXXXXXXXXXXXXXXXXXXXXXXXXXXIVKKRKKKFIRHQSDRYRKLKPNWRKPRGIDNRVRRKFKGMYKMPNIGYGSNKKTRHMLRDGFRKVLIHNVRELEVLMMQNRRFCGEIAHAVSSKNRKLIVERAQQLAIKLTNPHGRLRSEENERGHKTTRPSRRKGKKVKFVRDIVREVCGFTPYEKRVLELLRISKDKRALKFLKRRIGTHSRAKRKREEMSQVLVAQRKMTKGTSSFGKRHNKTHTLCRRCGRSAYHIQKHRCAQCGYPNIHRRHFNWSVKAKRRKTTGTGRLRHMKIVYRKFRNGFRENXXXXXXXXXXXXXXXXXXXXXXXXXXXXXXXXXXXXXXXXXXXXXXXXXXXDRATWKSNYFLKAIQLFDEYPRCFIVNINNVRSKQMQQIRQSLRGIAILLMGKNTMIRKAIRGHLEHNPDLEKLLPHLTGNVGFVFTKGDLCDVREKILENRVAAPAKAGALAPVDVHVPAQNSGLGPEKTSFFQALQIQTKISRGTIEILSDVHLIKKDEKVGASEAALLQMLKIYPFSYGLVIEKVYDSGTVFDPSILDITDDDLRAKFMQGVANIASISLEIGYPTVASVPHSIANGFKNIMAIGVATDFPEIAQLKELLSDPEKLIDPFTRKDWYDVKAPSMFSTRQVGKTLVNRTQGTKIASEGLKGRVFESSLADLQSGDEAFLKFRLIVEDVQGKHCLTNFHGMDMTTDKLRSMVKKWQTMIEANVDVKTTDGYLLRLFCIGFTTKQEKKTCYAQKQQVRLIRKKMVELMVREVSSSDLKEVVRKLRPEIIGKDIEKACESIYPLHDVYIRKVKVLKKPKFDIGKLMELHGGDAYEPPVQESVXXXXXXXXXXXXXXXXXXXXXXXXXXXXXXXXXXXXXXXXXXXXXXXXXXXXXXXXXXXXXXXXXXXXXXXXXXXXXXXXXXXXXXXXXXXXXXXXXXXXXXXXXXXXXXXXXXXXXXXXXXXXXXXXXXXXXXXXXXXXXXXXXXXXXXXXXXXXXXXXXXXXXXXXXXXXXXXXXXXXXXXXXXXXXXXXXXXXXXXXXXXXXXXXXXXXXXXXXXXXXXXXXXXXXXXXXXXXXXXXXXXXXXXXXXXXXXXXXXXXXXXXXXXXXXXXXXXXXXXXXXXXXXXXXXXXXXXXXXXXXXXXXXXXXXXXXXXXXXXXIIRTRKFMTNRLLNRKQMVVDIIHPGRATVAKTEVREKLARMYKTTPDTVFCFGFRTQFGGGRTTGFGLIYDSLDFAKKNEPKYRLARHGLYERKQRKERKNRMKKVRGTKKVRDKLNNLVLFDKATYDKLYKEVPSYKLITPAVVSERLKIRGSLARYALQEFHAKGLIKLVSKHHAQMIYTRTTRGPKKHLKRCHAPKHWMLDKLSGVYAPRPSTGPHKLRECLPLVIFLRNRLKYALTGAEVKKIVKSRLVKVDGKVRTDPTYPAGFMDVIEIERTNELFRLIYDVKGRFCVHRITPDEAKYKLCKVKKLVMGPKGVPAVVTHDARTIRYPDPLIKANDTIQVDIATGKITNFIKFDSGNMCMITGGHNLGRVGIVTHRERHPGSFDIVHVKDAAGHSFATRMSNVFIIGKANKAYVSLPRGKGVKLSIAEERDRRMKLNISYP-TGCQKLVEVDDEKKVRCFYEKRIASEVAADTLGDEWKGYVFRITGGNDKQAFPMMQGVLSSGRVRLLLAKKHG-FQPKRKGSRKRKSVRGCIVDANLSVINLAIIKKGEQEIPGLTDSNVPRRLGPKRANKIRKLFNLSKEDDVRQYVVRRPLPEKEGQKTKAPKIQRLITPRLLQRKRDEVEAQISQALLELEMNSDLKAQLRELCFTGAKEKKAVIIFVPVPQLKSYQKIQSRLVRELEKKFSGKHIVFIAQRRILPKPTRKNKQKRPRSRTLTAVHDSILDDLVYPAEIVGKRIRVRLDGSRLIKVHLDKAQQTNIEHKTDTFTAVYKRLTGKEVNFEFXXXXXXXXXXXXXXXXXXXXXXXXXXXXXXXXXXXXXXXXXXXXXXXXXXXXXXXXXXXXXXXXXXXXXXXXXXXXXXXXXXXXXXXXXXXXXXXXXXXXXXXXXXXXXXXXXXXXXXXXXXXXXXXXXXXXXXXXXXXXXXXXXXXXXXXXXXXXXXXXXXXXXXXXXXXXXXXXXXXXXXXXXXXXXXXXXXXXXXXXXXXXXXXXXXXXXXXXXXXXXXXXXXXXXXXXXXXXXXXXXXXXXXXXXXXXXXXXXXXXXXXXXXXXXXXXXXXXXXXXXXXXXXXXXXXXXXXXXXXXXXXXXXXXXXXXXXXXXXXXXXXXXXXXXXXXXXXXXXXXXXXXXXXXXXXXXXXXXXXXXXXXXXXXXXXXXXXXXXXXXXXXXXXXXXXXXXXXXXXXXXXXXXXXXXXXXXXXXXXXXXXXXXXXXXXXXXXXXXXXXXXXXXXXXXXXXXXXXXXXXXXXXXXXXXXXXXXXXXXXXXXXXXXXXXXXXXXXXXXXXXXXXXXXXXXXXXXXXXXXXXXXXXXXXXXXXXXXXXXXXXXXXXXXXXXXXXXXXXXXXXXXXXXXXXXXXXXXXXXXXXXXXXXXXXXXXXXXXXXXXXXXXXXXXXXXXXXXXXXXXXXXXXXXXXXXXXXXXXXXXXXXXXXXXXXXXXXXXXXXXXXXXXXXXXXXXXXXXXXXXXXXXXXXXXXXXXXXXXXXXXXXXXXXXXXXXXXXXXXXXXXXXXXXXXXXXXXXXXXXXXXXXXXXXXXXXXXXXXXXXXXXXXXXXXXXXXXXXXXXXXXXXXXXXXXXXXXXXXXXXXXXXXXXXXXXXXXXXXXXXXXXXXXXXXXXXXXXXXXXXXXXXXXXXXXXXXXXXXXXXXXXXXXXXXXXXXXXXXXXXXXXXXXXXXXXXXXXXXXXXXXXXXXXXXXXXXXXXXXXXXXXXXXXXXXXXXXXXXXXXXXXXXXXXXXXXXXXXXXXXXXXXXXXXXXXXXXXXXXXXXXXXXXXXXXXXXXXXXXXXXXXXXXXXXXXXXXXXXXXXXXXXXXXXXXXXXXXXXXXXXXXXXXXXXXXXXXXXXXXXXXXXXXXXXXXXXXXXXXXXXXXXXXXXXXXXXXXXXXXXXMQNEAGEHVDLYVPRKCSASNRIIHAKDHASIQINFATGSNKTFAICGDIRRMGESDDCLNRLTKRDGLLPKNXXXXXXXXXXXXXXXXXXXXXXXXXXXXXXXXXXXXXXXXXXXXXXXXXXXXXXXXXXXXXXXXXXXXXXXXXXXXXXXXXXXXXXXXXXXXXXXXXXXXXXXXXXXXXXXXXXXXXXXXXXXXXXXXXXXXXXXXXXXXXXXXXXXXXXXXXXXXXXXXXXXXXXXXXXXXXXXXXXXXXXXXXXXXXXXXXXXXXXXXXXXXXXXXXXXXXXXXXXXXXXXXXXXXXXXXXXXXXXXXXXXXXXXXXXXXXXXXXXXXXXXXXXXXXXXXXXXXXXXXXXXXXXXXXXXXXXXXXXXXXXXXXXXXXXXXXXXXXXXXXXXXXXXXXXXXXXXXXXXXXXXXXXXXXXXXXXXXXXXXXXXXXXXXXXXXXXXXXXXXXXXXXXXXXXXXXXXXXXXXXXXXXXXXXXXXXXXXXXXXXXXXXXXXXXXXXXXXXXXXXXXXXXXXXXXXXXXXXXXXXXXXXXXXXXXXXXXXXXXXXXXXXXXXXXXXXXXXXXXXXXXXXXXXXXXXXXXXXXXXXXXXXXXXXXXXXXXXXXXXXXXXXXXXXXXXXXXXXXXXXXXXXXXXXXXXXXXXXXXXXXXXXXXXXXXXXXXXXXXXXXXXXXXXXXXXXXXXXXXXXXXXXXXXXXXXXXXXXXXXXXXXXXXXXXXXXXXXXXXXXXXXXXXXXXXXXXXXXXXXXXXXXXXXXXXXXXXXXXXXXXXXXXXXXXXXXXXXXXXXXXXXXXXXXXXXXXXXXXXXXXXXXXXXXXXXXXXXXXXXXXXXXXXXXXXXXXXXXXXXXXXXXXXXXXXXXXXXXXXXXXXXXXXXXXXXXXXXXXXXXXXXXXXXXXXXXXXXXXXXXXXXXXXXXXXXXXXXXXXXXXXXXXXXXXXXXXXXXXXXXXXXXXXXXXXXXXXXXXXXXXXXXXXXXXXXXXXXXXXXXXXXXXXXXXXXXXXXXXXXXXXXXXXXXXXXXXXXXXXXXXXXXXXXXXXXXXXXXXXXXXXXXXXXXXXXXXXXXXXXXXXXXXXXXXXXXXXXXXXXXXXXXXXXXXXXXXXXXXXXXXXXXXXXXXXXXXXXXXXXXXXXXXXXXXXXXXXXXXXXXXXXXXXXXXXXXXXXXXXXXXXXXXXXXXXXXXXXXXXXXXXXXXXXXXXXXXXXXXXXXXXXXXXXXXXXXXXXXXXXXXXXXXXXXXXXXXXXXXXXXXXXXXXXXXXXXXXXXXXXXXXXXXXXXXXXXXXXXXXXXXXXXXXXXXXXXXXXXXXXXXXXXXXXXXXXXXXXXXXXXXXXXXXXXXXXXXXXXXXXXXXXXXXXXXXXXXXXXXXXXXXXXXXXXXXXXXXXXXXXXXXXXXXXXXXXXXXXXXXXXXXXXXXXXXXXXXXXXXXXXXXXXXXXXXXXXXXXXXXXXXXXX
Armorloricus_elegans           --------------------------------------------------------------------------------------------------------------------------------------------------------------------------------------------------------------------------------------------------------DGIRDREADITKERIQKILNCGANVILTTGGIDDLCMKYFVEAGAMAVRRCKKADLKRISRAIGGSVVLSLANLEGEESYEASMLGQADEVVQDRICDD-------SSASILLRGANDYYCDEMERSVHDALCVVKRVLESNQLVPGGGAVEAALSVYLENFATSLSSREQLAIAEFARSLLVIPKTLAVNAAKDATDLVAKLRAYHSRASANEDYRLCGLDLINGQIVDMKAAGVLEQLVSK-----------------------REKPLHVREDNFNAAKGVADAVRTSLGPKGMDKMIQSGSGDVMITNDGATILKQISAKHPAARMFVDLSQSQDIEAGDGTTTVVIIAGSLLAAAQKLLKKSLHPTAISESFGRAAVKAVEILIAQPIDLNDRGALIRSASTALNSKVVSQHADILAPIAVDAVMKCVDLRNVRVVKKLGGTVEDTEMVDGLVLNQRGRSRVEKAKIGLIQFCISAPKTDMENNVVISDYAQMDRVLREERQYTINIVKQIKKSGCNVLLVQKSILRDALSDLAMHFLGKAKIAVIREIEREEVPFICNSLGLKPIASLDHFSAECLASADVVEEGAAKVVRIRGIQPATVSLLVRGSNKLVLDEAERSLHDALCVVRCLVKNRALVAGGGAPEMELALRLAEYSHTLTGVDAYCFRAYAEALDVIPYTLAENAGLSSIATVTELRNRHAEKQVNAGINVRKGAITDMLEENVVQPVLVTISAIQLA----------------------------------------------------------------MMVSPDGDVTVTNDGATILDQMEVQHEIGKLMVQLSKSQDDEIGDGTTGVVVLAGALLEMAEPLLERGIHPIRIADGFDRAAQLAAQELDRIAEDFPVSAEDTSLAEVAMTTLSSKVVSKVKSQLADIAVKAVLNVADMQRRDVDFELIKVEGKVGGTIEDTVLVDGVVVDKDFSHPQM-------------------------------------------------------------------------------------------------------------------------------------------------------------------------------------------------------------------------------------------------------------------------------------------------------XXXXXXXXXXXXXXXXXXXXXXXXXXXXXXXXXXXXXXXXXXXXXXXXXXXXXXXXXXXXXXXXXXXXXXXXXXXXXXXXXXXXXXXXXXXXXXXXXXXXXXXXXXXXXXXXXXXXXXXXXXXXXXXXXXXXXXXXXXXXXXXXXXXXXXXXXXXXXXXXXXXXXXXXXXXXXXXXXXXXXXXXXXXXXXXXXXXXXXXXXXXXXXXXXXXXXXXXXXXXXXXXXXXXXXXXXXXXXXXXXXXXXXXXXXXXXXXXXXXXXXXXXXXXXXXXXXXXXXXXXXXXXXXXXXXXXXXXXXXXXXXXXXXXXXXXXXXXXXXXXXXXXXXXXXXXXXXXXXXXXXXXXXXXXXXXXXXXXXXXXXXXXXXXXXXXXXXXXXXXXXXXXXXXXXXXXXXXXXXXXXXXXXXXXXXXXXXXXXXXXXXXXXXXXXXXXXXXXXXXXXXXXXXXXXXXXXXXXXXXXXXXXXXXXXXXXXXXXXXXXXXXXXXXXXXXXXXXXXXXXXXXXXXXXXXXX------------------------------------------------------------------------------------------------------------------------------------------------------------------------------------------------------------------------------------------------LPAFRAVVVYMIDLSEQCGYPLESQLELFRHIQPLFLNKPLLVAANKSDVIKLSELSGDGVINLRNTACDALLAQRVEEKLDAKKRLRVAIPQKRDKSRPPFIPKLEREIEQEMGDDYILDLKKHYWKYDKIPEIWEGHNVADYIDP---------------------------------------------------------TNQEEREKGKTVEVGRAYFETEHKRFTILDAPGHKSFVPNMISGTSQADVAVLVISARRGEFETGFERGGQTREHAMLAKTAGVKQLIVLVNKMDDSTVQWDEQRYKECRDK--------------------------------------------------------------------------------------------------------------------------------------------------------------------------------------------------------------------------------------------------IRDMSVIAHVDHGKSTLTDSLVSKAGIIAASKAGDTRFTDTRKDEQERCITIKSTAISLYYELQEKDRLMINFLINLIDSPGHVDFSSEVTAALRVTDGALVVV----------------------------------------------------------------------------------------------------------------------------------------------MNRKDEAAQLLAKLLKGPERELEGKPFLKFVMRTWLPAGETLLQMIAIHLPSPVTAQRYRAEMLYEGPLDDAACKQCDPKAPLMMYVSKMVPTTDKGRFYAFGRVFSGV--------------------------------------------------------------------------------------------------------------------------------------------------------------------------------------------FPEGVAEEVDSGIYPRQDIKARARLLCDKYEFDISEARKIWCFGPEATGPNFLIDCTKGVQYLNEIKDSMVAGFQWASKEGVLCDENMRAVRFNIHDVTLHTDAIHRGGGQIIPTARRCFYACVLTAESRM-------------------------RAGHVFEEMHVAGTPMFVVKAYLPVNESFGFTADLRSNTGGQAFPQCIFDHWQILPGDPKPRQVVDVTRARKGLKEGLPDLAKYLDKLDAGSSKTYPTQCSSLRKNGFVLIKQRPCKIVEMSTSKTGKHGHAKVHMIGIDLFTSKKLEDICPSTHNMDVPRVQRHDFQLVNIDEDGFLSVMDNGDMREDLRVPDGTVLKAMDEEAVIGXXXXXXXXXXXXXXXXXXXXXXXXXXXXXXXXXXXXXXXXXXXXXXXXXXXXXXXXXXXXXXXXXXXXXXXXXXXXXXXXXXXXXXXXXXXXXXXXXXXXXXXXXXXXXXXXMGRRPARCYRYCKNKPYPKSRFCRGVPDAKIRIYDLGRKKAGVEEFPLCVHMVSLEYEQLSSEALEAARICANKYLVKHGGKENFHMRIRVHPFHVLRINKMLSCAGADRLQTGMRHAFGKPQGTVARVHIGQVIMSVRSKWANEATCIEAFRRAKFKFPGRQKIVVSKKWGFTKFEHDYYKELREKKQLIDMGVHVTYVPDHGPL------------------------------MPCIKGHDVIAQAQSGTGKTATFAITVLQKIDLSQRVCQALILAPTRELAQQIQAAVCSLGEYLNVFCHACIGGTTIRQDLSKLEHVVVGTPGRVFDMIQRRALRTDSIKMFVLDEADEMLSRGFKDQIYEVFKTLQVVLLSATMPPEVLDVTKNFMRNPINILVKKEELTLEGIKQFYVDVQREEWKFDTLCDLYETMTITQAVIFCNTRRKVDQLQQALHEKDFTVSSMHGDMEQKERDMIMHEFRTGSSRILITTDLLSRGIDVQQVSLVINYDLPTNREAYIHRIGRSGRFGRKGVAINFVGEDDKRMLKDIQQHYSTEIQELPANVADLIXXXXXXXXXXXXXXXXXXXXXXXXXXXXXXXXXXXXXXXXXXXXXXXXXXXXXXXXXXXXXXXXXXXXXXXXXXXXXXXXXXXXXXXXXXXXXXXXXXXXXXXXXXXXXXXXXXXXXXXXXXXXXXXXXXXXXXXXXXXXXXXXXXXXXXXXXXXXXXXXXXXXXXXXXXXXXXXXXXXXXXXXXXXXXXXXXXXXXXXXXXXXXXXXXXXXXXXXXXXXXXXXXXXXXXXXXXXXXXXXXXXXXXXXXXXXXXXXXXXXXXXXXXXXXXXXXXXXXXXXXXXXXXXXXXXXXXXXXXXXXXXXXXXXXXXXXXXXXXXXXXXXXXXXXXXXXXXXXXXXXXXXXXXXXXXXXXXXXXXXXXXXXXXXXXXXXXXXXXXXXXXXXXXXXXXXXXXXXXXXXXXXXXXXXXXXXXXXXXXXXXXXXXXXXXXXXXXXXXXXXXXXXXXXXXXXXXXXXXXXXXXXXXXXXXXXXXXXXXXXXXXXXXXXXXXXXXXXXXXXXXXXXXXXXXXXXXXXXXXXXXXXXXXXXXXXXXXXXXXXXXXXXXXXXXXXXXXXXXXXXXXXXXXX-----------------------------------------------------------------------------------------------------------KFPYLFTGERQPWRGILLYGPPGTGKTYLAKAVATEANNSTFVSVKSSDLVSKWVGESEKLIKQVFKLARDMQPAIIFIDEVDSLCSSRSDSESDHSRRLKTEFLVQMQGIGSDNDGVLVLGATNIPWVLDSAIRRRFEKRIYIPLPEAPARTHMFKLHIGTPHNLFGKKADLYSGADIKSCVKEALMEPVRKVQQATHFRRVRGPARDN------------------------------------------------------------------------XXXXXXXXXXXXXXXXXXXXXXXXXXXXXXXXXXXXXXXXXXXXXXXXXXXXXXXXXXXXXXXXXXXXXXXXXXXXXXXXXXXXXXXXXXXXXXXXXXXXXXXXXXXXXXXXXXXXXXXXXXXXXXXXXXXXXXXXXXXXXXXXXXXXXXXXXXXXXXXXXXXXXXXXXXXXXXXXXXXXXXXXXXXXXXXXXXXXXXXXXXXXXXXXXXXXXXXXXXXXXXXXXXXXXXXXXXXXXXXXXXXXXXXXXXXXXXXXXXXXXXXXXXXXXXXXXXXXXXXXXXXXXXXXXXXXXXXXXXXXXXXXXXXXXXXXXXXXXXXXXXXXXXXXXXXXXXXXXXXXXXXXXXXXXXXXXXXXXXXXXXXXXXXXXXXXXXXXXXXXXXXXXXXXXXXXXXXXXXXXXXXXXXXXXXXXXXXXXXXXXXXXXXXXXXXXXXXXXXXXXXXXXXXXXXXXXXXXXXXXXXXXXXXXXXXXXXXXXXXXXXXXXXXXXXXXXXXXXXXXXXXXXXXXXXXXXXXXXXXXXXXXXXXXXXXXXXXXXXXXXXXXXXXXXXXXXXXXXXXXXXXXXXXXXXXXXXXXXXXXXXXXXXXXXXXXXXXXXXXXXXXXXXXXXXXXXXXXXXXXXXXXXXXXXXXXXXXXXXXXXXXXXXXXXXXXXXXXXXXXXXXXXXXXXXXXXXXXXXXXXXXXXXXXXXXXXXXXXXXXXXXXXXXXXXXXXXXXXXXXXXXXXXXXXXXXXXXXXXXXXXXXXXXXXXXXXXXXXXXXXXXXXXXXXXXXXXXXXXXXXXXXXXXXXXXXXXXXXXXXXXXXXXXXXXXXXXXXXXXXXXXXXXXXXXXXXXXXXXXXXXXXXXXXXXXXXXXXXXXXXXXXXXXXXXXXXXXXXXXXXXXXXXXXXXXXXXXXXXXXXXXXXXXXXXXXXXXXXXXXXXXXXXXXXXXXXXXXXXXXXXXXXXXXXXXXXXXXXXXXXXXXXXXXXXXXXXXXXXXXXXXXXXXXXXXXXXXXXXXXXXXXXXXXXXXXXXXXXXXXXXXXXXXXXXXXXXXXXXXXXXXXXXXXXXXXXXXXXXXXXXXXXXXXXXXXXXXXXXXXXXXXXXXXXXXXXXXXXXXXXXXXXXXXXXXXXXXXXXXXXXXXXXXXXXXXXXXXXXXXXXXXXXXXXXXXXXXXXXXXXXXXXXXXXXXXAGFDRHITIFSPEGRLYQVEYAFKAIQQSGVTSVGVCGADSACVVTQKKVPDKLFDASTVSGLFRINDSVGCAMTGMVADSRAQVARARSDALSFRYKNGYDMPVDLVAKRVADIAQVYTQNAEMRPLGCSMIAIAYDDECALLYRTDPAGYYSGFRACAAGAKMQELSNWLEKHAHGLDVIRVAIKSLSAVLSADFKSTEIEVGVVSRDDPLFTTLDEEA--SNSELACVYAALILADDDVAITSDKITAILEAAKVKVESYWPTLFAKALEGINVKDLITNIGS----------------------------------------KDKRFSGTVKLKHVPRPKFKVCVLGDQQHIDEAKANGLQSMDVETLKKLNKNKKLVKKLAKSYDAFLASDSLIKQIPRILGPGLNKAGKFPTMLTHNDNMKVTDVKSTIKFQMKKVLCLAVAVGHVNMSQDQLVSNISLAINFLVSLLKKNWQNVRALYIKTTMGPVQRIYMPAKFDPTAIHEVFLRVVGGEVGAASSLAPKIGPLGLSPKKIGDDIAKATKEWKGLRVTVKLTIQNRQATVEVEPSASSLVIRALKEPPRDRKKVKNIKHSGNLTLDDVIAVARTMRRSMARRLDGTVKEILGTCQSVGCTVEGVHPHDIIERINEGACQIPMGAYKYMQEIYRKKQSDVMRFLLRVRTWQYRQLNTVHRVPRPSRPDKARRIGFRAKQGFVVYRIRVRRGNRKRKAEKGAVYGKPTNQGVNQLKPTRSKQALAEERVGRKCGALRVLGSYWVAQDSTYKYFEVVLIDPFHKAIRRDPKINWICQPKQKHREMRGLTTAGKKSRGLGKGHKFHQTIGGSRRKAWKRRNTLSLRRYRMTRYSVDPENATKSCKARGSNLRTHFKNTRETAQAIKRMHLRRAVQYLKNVVAQKEIVPFRRFTGGIGRHAQAKQFKTQGRWPKKSATFLLQLLKNAESNAEVKGLDTDHLVIEHIQVNRAPKMRRRTYRAHGRINPFMSSPCHIEVILSEKEMKIDLCSYSGHKIYPGHGKRVVKVDGKVFIFINKKCERASAMKRNPRKVNWTVLYRRKHKKGNVEESVKARSRRAVKFQRAIAGASLNDIIAKRNQKPEVRAAQREQAI--------------------------------------ALIKHPLTTESAMKKIEDNNTLVFICAVEATKPSIAAAVKKLYNISVQKVNTLIRPDGSKKAYVKLAPDYDALDVANKIGII----------------------------------------------GFKAGMTHIVREVDKPGSKVNKKEVVEAVTIIETPPLVVVGVVGYIATPRGQRALKTVWAEHLGEDCKRRFYKNYRAKRKAFSKYARKWQDARGQAALERDLAAMRKHCVAVRAIVHTQMKLLRKKRKKAFLAEVQLNGGTIAQKVDWAREHLEKNVAISSVFAQDEMLDVIAVTKGKGYQGVTSRWHTKKLPRKTHKGLRKVACIGAWHPARVSTTVARAGQKGYHHRTELNKKVYRIGHGKLVCNNASTEYDLTEKSITPMGGFPHYGQVYNDFVMLKGCVPGPKKRVITLRKSLLVHTKRSALERITLKFIDTSSKFGHGRFQTPDEK-TAINEVVTREYTIHVHKRIHGIGFKKRAPRAIKEIRKFAETVMGTPDVRVDTRLNKFIWHKGIKNVPYRVRVRLARKRNEDEDSVHKLYTLVTFVPVDTFKGLQTVNVD-----------HHNDRYLRVKPSWRKPRGIDNAVRRRFRGTPRMPKIGYGTRKRDRHTLPNGFKKVLVHNEKDLEMLMMNNRRFAAEIGHAVSARKRKTIVERAKQLNIRVLNANARLRTEENERGHRVTRPSSTKGRRNKMVREVVREIVGFSPYERRALELLKISKDKRVLKFCKKRLGSHVRAKRKREELQGVLTQMRKXXXXXXXXXXXXXXXXXXXXXXXXXXXXXXXXXXXXXXXXXXXXXXXXXXXXXXXXXXXXXXXXXXXXXXXXXXXXXXXXXXXXXXXXXXXXXXXXXXXXXXXXXXXXXXXXXXXXXXXXXXXXXXXXXXXX--------------------------------------------------------------------------------------TNGDLSEVKDLVVANRVEAPAKAGALAPCAVVVPAQNTGLPPDKTGFFQSLQIGTKITRGTIEILNDVPLIAAGEKVGASEATLLNMLKISPFTYGLIIQQVYDQGTVFDPKVLEITTADLLRSFAAAVSNVAAVSLAVGYPTKASVAHSIANGFRNVLALALATDFEQAQHMKDLLSDPEK-XXXXXXXXXXXXXXXXXXXXXXXXXXXXXXXXXXXXXXXXXXXXXXXXXXXXXXXXXXXXXXXXXXXXXXXXXXXXXXXXXXXXXXXXXXXXXXXXXXXXXXXXXXXXXXXXXXXXXXXXXXXXXXXXXXXXXXXXXXXXXXXXXXXXXXXXXXXXXXXXXXXXXXXXXXXXXXXXXXXXXXXXXXXXXXXXXXXXXXXXXXXXXXXXXXXXXXXXXXXXXMLMPKKNRRLIYEELFKEGVMVAKKDFSTKHQ-PNLHVIKSMQSLRSRGFVEEQFAWRHYYWRLTNEGLEYLRALLHLPNEIVPNTLKERAFQKQSQVFLNRKRHVRFYKSVGLGFKTPPEAISGTYVDAKCPFTGSVNIRGRLLTGTVAKTKMQRTIVIRRDYLHFVRKYKRFEKRHKNMSVHLSPCFREVQVGDVVTVGECRPLAKTVRFNVLKVTKXXXXXXXXXXXXXXXXXXXXXXXXXXXXXXXXXXXXXXXXXXXXXXXXXXXXXXXXXXXXXXXXXXXXXXXXXXXXXXXXXXXXXXXXXXXXXXXXXXXXXVIRTRKFMTNRLLARKQMVVDILHPNRGTVSKTEVRTRLAKMYKSTPDCVFCFGFHTQFGGGKTTGFALIYDTLDLAKKFEPKYRLVRHGF---------------------VRDKLNNAVFFDKPTYDKLCKEVPSYKLITPSIVSERLKISASLAKRALAELHEKGHIRQIVKHSSQLIY----------------------------------------------------------TGKEVQKILMQRLVKVDGRVRTDCKFPAGFMDVISIAKTGEHFRLIYDVKGRFAVHRISKEEAEYKLCKVRQVRTGPKAVPYLVTHDGRTIRYPDPIVKVNDTIQLDLASGQVRDVIAFDTGNLVMVCGGRNLGRVGVLVHRERHPGAFDIVHVKDAQGHQFATRLQYLFIIGK-------------------------MKLNVSYPACGAQKLFEIDDERKVRFFYGKRISQEVALDGLGDEWKGYAARISGGNDKQGFPMKQGVLTHLRVRLLLSKGQSCYRPRRAGERRRKSVRGCIVDQNLSVLALIIVKRGDKDIPGLTDVSIPRRLGPKRAGKIRKLFNLTKKDDVRQYVVRRPLPQREGKKTKAPKIQRLVTPQRLQRKRDELEQKVAAALLELERSSDLKGQLRELHISAARQKKAIVVFVPHTLLAAFHKIQQRVVRELEKKLSGAHVLVVAQRRILSKPSRKGVQKRPVSRTLTAVHDRILEDVVHPAEIVGKRVRVRLDGSRLVKVHLDQSHKITLEHKLDTFVSVYKKLTGKEIAFEFMGISQDSWHKRRKTGGKRAPIRKKRKYELGRPAANTKLGARRVHAVRTRGGNEKLRALRLDTGNFAWPSERCTRKTRIIDVVYNATNNELVRTKTLVKNCIVVVDATPFRQWYEAHYAAPLGRKKTAKLKRCKSRQKVFEQRKKHAKVESAIDEQFLTGRLLACVASRPGQVGRCDGYVIEGKELEFYL-------LCEMVTDILIEENNVMPVSSPVTVCGDIHGQFYDLKELFRTGGYMPDTHYVFMGDFVDRGYYSLETLTLLLCLKARYPDKITLLRGNHESRLITQVYGFYDECLNKYGNSNVWRYCT-----------------------------------------------------------------------------------------------------------------------------XXXXXXXXXXXXXXXXXXXXXXXXXXXXXXXXXXXXXXXXXXXXXXXXXXXXXXXXXXXXXXXXXXXXXXXXXXXXXXXXXXXXXXXXXXXXXXXXXXXXXXXXXXXXXXX--------------------------------------------------------------------------------------------------------INWTCSVFVTTKVPFPLTLRFKPMLQRGVELSSLDASWVSSASWYFLNVFGLRSMYSLCLGENNAADQTRVMQEQMSGAAMQMPQDPXXXXXXXXXXXXXXXXXXXXXXXXXXXXXXXXXXXXXXXXXXXXXXXXXXXXXXXXXXXXXXXXXXXXXXXXXXXXXXXXXXXXX-------------------------------------------------------------FAQAYPEQKVVTVGALRIGLCHGHQLVPWGDSDALALLQYQLDCDVLITGHTHKFEAFERDSHMFINPGSATGAYTPLPSFVLMDIQSSVVVIYVYQFIDDEVKVERIEYKKPAGNADKGKKIFKQRCDQCHTVEKTGKHKTGPNLHGLIGRKTGQAPGFSYTDANKSKGIVWSKDTLFVYLLNPKKYIPGTKMIFAGLKKPQERADLIAYLEQSTXXXXXXXXXXXXXXXXXXXXXXXXXXXXXXXXXXXXXXXXXXXXXXXXXXXXXXXXXXXXXXXXXXXXXXXXXDPFADAAKQDSLIHVRIQQRSGRKTLTTVQGISSQYDLKKLVKACKKEFACNGTVVDHAEYGEVIQLQGDQRQNICKFLLDINLAKPEQIKKHGFXXXXXXXXXXXXXXXXXXXXXXXXXXXXXXXXXXXXXXXXXXXXXXXXXXXXXXXXXXXXXXXXXXXXXXXXXXXXXXXXXXXXXXXXXXXXXXXXXXXXXXXXXXXXXXXXXXXXXXXXXXXXXXXXXXXXXXXXXXXXXXXXXXXXXXXXXXXXXXXXXXXXXXXXXXXXXXXXXXXXXXXXXXXXXXXXXXXXXXXXXXXXXXXXXXXXXXXXXXXXXXXXXXXXXXXXXXXXXXXXXXXXXXXXXXXXXXXXXXXXXXXXXXXXXXXXXXXXXXXXXXXXXXXXXXXXXXXXXXXXXXXXXXXXXXXXXXXXXXXXXXXXXXXXXXXXXXXXXXXXXXXXXXXXXXXXXXXXXXXXXXXXXXXXXXXXXXXXXXXXXXXXXXXXXXXXXXXXXXXXXXXXXXXXXXXXXXXXXXXXXXXXXXXXXXXXXXXXXXXXXXXXXXXXXXXXXXXXXXXXXXXXXXXXXXXXXXXXXXXXXXXXXXXXXXXXXXXXXXXXXXXXXXXXXXXXXXXXXXXXXXXXXXXXXXXXXXXXXXXXXXXXXXXXXXXXXXXXXXXXXXXXXXXXXXXXXXXXXXXXXXXXXXXXXXXXXXXXXXXXXXXXXXXXXXXXXXXXXXXXXXXXXXXXXXXXXXXXXXXXXXXXXXXXXXXXXXXXXXXXXXXXXXXXXXXXXXXXXXXXXXXXXXXXXXXXXXXXXXXXXXXXXXXXXXXXXXXXXXXXXXXXXXXXXXXXXXXXXXXXXXXXXXXXXXXXXXXXXXXXXXXXXXXXXXXXXXXXXXXXXXXXXXXXXXXXXXXXXXXXXXXXXXXXXXXXXXXXXXXXXXXXXXXXXXXXXXXXXXXXXXXXFPSRMAQTLMKQRLKGAQKGHSLLKKKADALTIRFRQVLKKMIENRVLMGDVMKEAAFSLAEAKFAMGDFSNSVLQSASRAQFKVRTRRDNVAGVNLPAYDRCVDSDSYALTGLARGGQQLANCKRDRS---------------------------------------------------------------------XXXXXXXXXXXXXXXXXXXXXXXXXXXXXXXXXXXXXXXXXXXXXXXXXXXXXXXXXXXXXXXXXXXXXXXXXXXXXXXXXXXXXXXXXXXXXXXXXXXXXXXXXXXXXXXXXXXXXXXXXXXXXXXXXXXXXXXXXXXXXXXXXXXXXXXXXXXXXXXXXXXXXXXXXXXXXXXXXXXXXXXXXXXXXXXXXXXXXXXXXXXXXXXXXXXXXXXXXXXXXXXXXXXXXXXXXXXXXXXXXXXXXXXX
Alvinella_pompejana            ------------------------------------------------------------------------------------------------------------------------------------------------------------------------------------------------------------------------------------------------------------------------------------------LCLKYFIEAGAMAVRRCKKTDLKRIAKATGGKLIVTLANLEGEASYDASLLGQAEEVVQERICDDELILIKRSCASLILRGANDFMVDEMERSIHDALCVVKRVLESKTVVPGGGAVEAALSIYLENFATLLSSREQLAIAEFARSLLVIPKQLAVNAAQDSTDLVAKLRAFHNTSQLHKELKWIGLDLYEGQVRDNRKAGVFEPAISKIKSLKFATEAAITILRIDDMIKLKDKPTQIRYSNITAAKAVADAIRTSLGPRGMDKMIQADKGDVTITNDGATILKQMQVLHPAARMLVELSKAQDVEAGDGTTTVVIIAGSLLGAAQKLLDKGIHPTIISEAFQRAAEKSTEILMSMPLELTDRESLLKSATTSLNSKVVSQFSNTLSPLCVDAVLKNVDLHDIKIIQKLGGTVEDTELIEGLVFNQKGPHIIEKAKIGLIQFCISPPKTDMESQVIVSDYTQMDRVLREERQYILNIVKQIKKTGCNVLLIQKSILRDAVNDLALHFLAKMKIMVVKDIEREDIEFVCKTLGCRPVASLDHFQADTLGSAELVEEGESKIVKITGITNQTVSILVRGSNKLVLEEAERSIHDALCVIRCLVKKRALIAGGGAPEIELSLQLMKYANTQTGMDQYCFRAFADALEIIPFTLAENAGLNPISTVTELRNRHAQGEKTAGINVRKGAITNILEENVVQPLLVSTSAVHLAAETARSILKIDDIFDEFGRPFIILRDQEKQRRLTGLEAQKSHILAAKSIANTLRTSLGPKGLDKMLVSPDGDVTITNDGATILQQMDVNHEIAKLMVQLSKSQDDEIGDGTTGVVVLAGALLEHAEELLDRGIHPMRIADGYEMAAFVATQELEKISETFTVDKENEPLIKTAMTTLSSKIVNKCHRQMAEIAVNAILSVADFERKDVDFELIKVEGKVGG-----------------------------------------------------------------------------------ICQWGFDDEANHLLLHKQLPAVRWVGGPEIELIAIATGGRIVPRFEELTPDKLGHAGIVRELTFGTTKDRMLVIEECKNSRAVTIFIRGGNKMIVEEAKRSMHDALCVIRNLIKDSRIVYGGGASEIAASLAVAKKADEISTLEQYAVRAFADALESIPLALAENSGHAPIQTLAEVKARQVTENNPRLGIDCLFTGSCDMKEQHVIETLLSKKQQILLATQVVKMILKIDDIR-----------------------------------------------------VAKAIELKDKYQNIGAKLVQDVANNTNEEAGDGTTAATILARSIAKEGFDKISKGANPIEIRRGVMNAIDVVVDELKKMSKQVTTPEEIAQVATISANGDGKIISDAMKKVGKDGTITVKDGKTLKDELEVIEGMKFDRGYISPYFMNTSKGGKCEFQDCLVLLSEKKINSVQSIIPALEIANRKPLLIIAEDVEGEALSTLVLNRLKVGLQVCAVKAPGFGENRKNTLRDMAIASGSIVFGDEANLYNIEDVQPQDLGQFAEVVITKDDTLLMKGKGNPSDIEKRISQIREDIENTSSEYEKEKLQERLAKLSNGVAVIKVGGSSEVEVNEKKDRYTDALNATKAAVEEGIVPGGGTALIRCLNALESMKATNADQKMGIEIIKKAVKVPAYTIAANAGVDAQEVVTKIGYDAMTGEFVDMISSGIIDPTKVVRTAIVDAAGVASLLTTAEAVVTELPKYNFKKITVVPSAKDFIDIILSKTQRKTPTVIHRHYHISRIRQFYTRKVKFTQQNYHDKLTQILTDFPKLDDIHPFYADLMNVLYDKDHYKLALGQISTARHLIDNVAKDYVRLMKYGDSLYRCKQLKKAALGRMCTIMKRQAQSLEYLEQVRQHLSRLPSIDPNTRTLLICGFPNVGKSSFINKITRADVDVQPYAFTTKSLFVGHMDYRYLRWQVVDTPGILDHSLEERNTIEMQAITALAHLRAAILYVMDVSELCGHGIAEQAELFNSIKPLFANKPLIIC-NKVDVRRISELTEEGIIKVKTEACDRLLAHRVEQKMKSRKRLHVSVPTKRDKPRPPTIPKLERDLEIELGDDYILDLKKKYEKYDVIPEIWEGHNIADFIDPXXXXXXXXXXXXXXXXXXXXXXXXXXXXXXXXXXXXXXXXXXXXXXXXXXXXXXXXXXXXXXXXXXXXXXXXXXXXXXXXXXXXXXXXXXXXXXXXXXXXXXXXXXXXXXXXXXXXXXXXXXXXXXXXXXXXXXXXXXXXXXXXXXXXXXXXXXXXXXXXXXXXXXXXXXXXXXXXXXXXXXXXXXXXXXXXXXXXXXXXXXXXXXXXXXXXXXXXXXXXXXXXXXXXXXXXXXXXXXXXXXXXXXXXXXXXXXXXXXXXXXXXXXXXXXXXXXXXXXXXXXXXXXXXXXXXXXXXXXXXXXXXXXXXXXXXXXXXXXXXXXXXXXXXXXXXXXXXXXXXXXXXXXXXXXXXXXXXXXXXXXXXXXXXXXXXXXXXXXXXXXXXXXXXXXXXXXXXXXXXEIRAIMDKKKNIRNMSVIAHVDHGKSTLTDSLVSKAGIIAGSKAGETRFTDTRKDEQERCITIKSTAISLFYQLPEKDLKLIAFLINLIDSPGHVDFSSEVTAALRVTDGALVVVDCVSGVCVQTETVLRQAIAERIKPVLFMNKMDLALLTLQLGAEDLYQTFSRIIESINVIIATYSDGPMGNIHVDPSKGTVGFGSGLHGWAFTLKQFAEMYADKFKIKLMKRLWGDQFYNPKEKRWRGFTQYILDPIYKFEFCMKPKEETLKLVEKLLTSDDKDLLDKQLLKVVMRKWLPAGDALLQMITIHLPSPVSAQRYRMEMLYEGPHDDEAAKNCDPNGPLMMYISKMVPTSDKGRFYAFGRVFSGVVSTGMKARIMGPNFIPGKKEDLYVKAIQRTILMMGRYIEPIEDVPCGNVCGLVGVDQYILKTGTISTYEHAHNLKVMKFSVSPVVRVAVECKNPADLPKLVEGLKRLSKSDPLVQCSIEESGEHIVAGAGELHLEICLKDLEEDHACIPIKKSDPVVSYRETVSNTSDRTCLSKSPNKHNRLFMVAAPLPDGLPDEIDRGVSARQDQKERARYLADTYEFDVTEARKIWCFGPDGTGPNMVIDCTKGVQYLNEIKDSVVAGFQWASKEGVLCEENMRGIRFNILDVTLHADAIHRGGGQIIPTTRRCLYACVLTAEPRLMEPIYLVEIQCPEQAVGGIYGVLNRRRGVVIEENQVVGTPMFQVKAYLPVNESFGFTADLRSNTGGQAFPQCVFDHWQILPGDPKPNVIVQETRKRKGLKEGIPPLDNFLDKLXXXXXXXXXXXXXXXXXXXXXXXXXXXXXXXXXXXXXXXXXXXXXXXXXXXXXXXXXXXXXXXXXXXXXXXXXXXXXXXXXXXXXXXXXXXXXXXXXXXXXXXXXXXXXXXXXXXXXXXXXXXXXXXXXXXXXXXXXXXXXXXXXXXXXXXXXXXXXXXXXXXXXXXXXXXXXXXXXXXXXXXXXXXXXXXXXXXXXXXXXXXXXXXXXXXXXXXXXXXXXXXXXXXXXXXX---RPARCYRYCKNKPYPKSRFCRGVPDPKIRIYDLGRKKARVDEFPLCVHLVSDELEQISSEALEAGRICANKYMVKNCGKDAFHLRVRVHPFHVLRINKMLSCAGADRLQTGMRGAFGKPQGTVARVRIGQALMSVRCKDQHQEKAVEALRRAKFKYPGRQKIYISRKWGFTKWDREDYEKMRLDGRLVPDGVNAKYVPPHGPLFDDMNLREELLRGIYAYGFEKPSAIQQRAIMPCIKGHDVIAQAQSGTGKTATFAVAILQQLDVSLKECQALVLAPTRELAQQIQKVVIALGDYMEAQCHACIGGTNVREDLHILQHVVVGTPGRVYDMINRRALSTRYIKVFVLDEADEMLSRGFKDQIYDVFKTLQVILLSATMPADVLEVTKKFMRKTIRILVKKEELTLEGIRQFYIEVEREEWKLDTLCDLYETLTITQAVIFCNTRRKVEWLTEKMHARDFTVSAIHGDMDQ------------GSSRVLITTDLLARGIDVQQVSLVINYDLPTNRESYIHRIGRGGRFGRKGVAINFVTSEDHRSLKDIETFYNTQVEEMPMNVADLIFEGNNEVGVFSKLTNAYCLVAIGGSENFYSVFEGELADTIPVIHTSIAGCRIIGRLCAGNKHGLLVPGTTTDQELQHIRNSLPDSVKIQRVEERLSALGNVVVCNDYVALVHPDLDRETEEILADVLNVEVFRQTITENVLVGSYCSLSNQGALVHPKTSVEDQDELSSLLQVPLVAGTLNRGSDVIGAGMVVNDWIAFCGLDTTSTELSVIESVFRLXXXXXXXXXXXXXXXXXXXXXXXXXXXXXXXXXXXXXXXXXXXXXXXXXXXXXXXXXXXXXXXXXXXXXXXXXXXXXXXXXXXXXXXXXXXXXXXXXXXXXXXXXXXXXXXXXXXXXXXXXXXXXXXXXXXXXXXXXXXXXXXXXXXXXXXXXXXXXXXXXXXXXXXXXXXXXXXXXXXXXXXXXXXXXXXXXXXXXXXXXXXXXXXXXXXXXXXXXXXXXXXXXXXXXXXXXXXXXXXXXXXXXXXXXXXXXXXXXXXXXXXXXXXXXXXXXXXXXXXXXXXXXXXXXXXXXXXXXXXXXXXXXXXXXXXXXXXXXXXXXXXXXXXXXXXXXXXXXXXXXXXXXXXXXXXXXXXXXXXXXXXXXXXXXXXXXXXXXXXXXXXXXXXXXXXXXXXXXXXXXXXXXXXXXXXXXXXXXXXXXXXXXXXXXXXXXXXXXXXXXXXXXXXXXXXXXXXXXXXXXXXXXXXXXXXXXXXXXXXXXXXXXXXXXXXXXXXXXXXXXXXXXXXXXXXXXXXXXXXXXXXXXXXXXXXXXXXXXXXXXXXXXXXXXXXXXXXXXXXXXXXXXXXXXXXXXXXXXXXXXXXXXXXXXXXXXXXXXXXXXXXXXXXXXXXXXXXXXXXXXXXXXXXXXXXXXXXXXXXXXXXXXXXXXXXXXXXXXXXXXXXXXXXXXXXXXXXXXXXXXXXXXXXXXXXXXXXXXXXXXXXXXXXXXXXXXXXXXXXXXXXXXXXXXXXXXXXXXXXRKIPVPTNRYSPLKENWMKIFTPVVEHLHLQIRFNLKTRNVEIRTCKETDIAALQKAADFVKAFTLGFEVEDALALVRLDDLYLESFEITDVKPLKGDHLARAIGRIAGKGGKTKFTIENVTKTRIVLADSKIHILGSYQNIAIARAICNLILGSPPSKVYGXXXXXXXXXXXXXXXXXXXXXXXXXXXXXXXXXXXXXXXXXXXXXXXXXXXXXXXXXXXXXXXXXXXXXXXXXXXXXXXXXXXXXXXXXXXXXXXXXXXXXXXXXXXXXXXXXXXXXXXXXXXXXXXXXXXXXXXXXXXXXXXXXXXXXXXXXXXXXXXMFLTRSEYDRGVNTFSPEGRLFQVEYAIEAIKLGSTAIGIQTSEGVVLAVEKRVTSPLIEPNSIEKILEVDSHIACAMSGLIADSRTLIDRARVEAQNHWFTYNEKMSIESVTQAVSNLALQFGDDDAGAMSRPFGVALLFAEKGPRLFHMDPSGTFLQYDAKAIGSGSEGAQQALQEVYHKSMTLKEACKESLKILKQIMEEKLNETNVEXXXXXXXXXXXXXXXXXXXXXXXXXXXXXXXXXXXXXXXXXXXXXXXXXXXXXXXXXXXXXXXXXXXXXXXXXXXXXXXXXXXXXXXXXXXXXXXXXXXXXXXXXXXXXXXXXXXXXXXXXXXXXXXXXXXXXXXXXXXXXXXXXXXXXXXXXXXXXXXXXXXXXXXXXXXXXXXXXXXXXXXXXXXXXXXXXXXXXXXXXXXXXXXXRYDTRTTIFSPEGRLYQVEYAMEAIGHAGTCLGILAKDGVILAAEKRNTNKLLDEVSYSEKIYKLYDDMACSVAGITSDANVLTNELRLIAQRYMLQYQEPIPCEQLVSQLCDIKQLYTQFGGKRPFGVSLLYMGWDKHYGFQLYQSDPSGNYGGWKATCIGNNSGAAVSMLKQEYKESEVDLQTGLELAIKVLGKTLDTNKLTPEKVEIATLTRYSFSLTTFSPSGKLVQIEYALAAVAAGAPSVGIKATNGVVIATEKKHKSILYDEHSIHKVEQITKNMGMVYSGMGPDYRVLVKQARRLAQNYYLTYQEHIPTGQLVQKVANVMQEYTQQGGVRPFGVSLLIAGWRPYLYQCDPSGAYFAWKATAMGKNYANGKTFLEKRYNEDLELDDAVHKAILTLKESFEGQMTEDNIEIGLCGFRRLTPSEVKDAGFDRYITIFSPEGRLYQVEYAFKAINHGGLTSVAVRGKDCAAVVTQKKVPDKLIDPSTVTHLFAITEKIGCVMTGMLADSRSQVQRARYEAANWKYKYGYDIPVDMLCKRVADISQVYTQSAEMRPLGCSMMLIAYDDEGPLVYKADPAGYYCGYKAAAVGVKQIEANSFLEKKIKKRETVELGITCLSSVLSADFKPSEIEVGIVRKENPKFMKLTEQEXXXXXXXXXXXXXXXXXXXXXXXXXXXXXXXXXXXXXXXXXXXXXXXXXXXXXXXXXXXXXXXXXXXXXXXXXXXXXXXXXXXXXXXXXXXXXXXXXXXXXXXXXXXXXXXXXXXXXXXXXXXXXXXXXXXXXXXXXXXXXXXXXXXXXXXXXXXXXXXXXXXXXXXXXXXXXXXXXXXXXXXXXXXXXXXXXXXXXXXXXXXXXXXXXXXXXXXXXXXXXXXXXXXXXXXXXXXXXXXXXXXXXXXXXXXXXXXXXXXXXXXXXXXXXXXXXXXXMPPKFDPNEIKIVCLRAVGGEVGATSSLAPKIGPLGLSPKKVGDDIAKATQDWKGLRITVQLTIQNRQAKVSVVPTASALVIKALKEPPRDRKKVKHVKHSGNISMDEIYTIARTMRRSMARTFKGTVKEILGTAQSVGCTVDGQHPHDVADKVEAGEYDVPMGAYKYMQELYRKKQSDTMRFLLRIRCWQYRQLSKIHRAPRPSRPDKARRLGYKAKQGFVIYRVRIRRGGRKRPVPKGQVYGKPSNCGINQLKNQRSLQAIAEERVGRKCKALRVLNSYWVAQDSTYKFFEVIAIDPFHKAIRRDPTLQWICKPTAKHREMRGLTSANRKSRGLGKGHRFTKTIGGSRRAAWKRNNTLQAHRRRMTRYSLDPENATKSAKARGSHLRVHFKNTRETAQTIKHMHLRRAVSFLKNVKAHKECVPFRRYNGGVGRCAQAKNWKTQGRWPQKSAEFLLQLLKNAESNAEFKGLDTDHLVIEHIQVNRAPKMRRRTYRAHGRINPYMSSPCHVEVILAEREMKIELCVFSGYKIYPGHGKKLVKVDGRGFQFVNGKCEKSYLMKRNPRKINWTVLYRRKHKKGQTEEVSKKRTRRTTKFQRAITGATLTDILAKRNQKPEVRKAQREQAIRKKIRTSVHFHRPKTLRLPRQPKYPRKSTPRRPRLDKYKIVKYPLTTESAMKKIEDNNTLVFIVDKRANKPQIKIAVKQLYDIDVSKVNTLIRPDGEKKAYVRLAPDFDALDVASKIGIISHRKFSAPRHGSLGFLPKKRSSRHRGKVKAFPKDDKNKPLHLTAFLGYKAGMTHIVRDVDRPGSKVNKKEVVEPVTIIETPPMIIVGVVGYIETPHGLRTFRTLFAEHLSDECKRRFYKNYKCKKKAFTKACKKYQDELGKKEIQKDLNKMKKYCTVIRVIAHTQMKMLKKRQKKAHIMEIQINGGTIADKVDWAYAHFEKPVQVSDVFAQDEMIDIIGVTKGKGFKGVTSRWHPKKLPRKTHKGLRKVACIGAWHPARVAFSVARAGQKGYHHRTEMNKKIYRIGQGKLVKNNASTESDVTEKTITPMGGFPHYGEVNNDFIMIKGCCVGPKKRVLTLRKSLLVHTKRRALEKITLKFIDTSSKFGHGRFQTHQEK--------------------------KRAPRAIKAIRQFAYKQMGTEDVRIETRLNKHIWSKGIRNVPFRVRVRLARKRNEDEDSPHKLYTLVSYVPVTTFKGTQTVNVEVVKKRTKKFIRHQSDRYAKLKPNRRKPRGIDNRVRRKFKGQYLMPNIGYGSNKKTKHICPDGFRKFLVHNVRELEILMMQNKRFSAEIAHTVSSKKRKDIVERAQQLSIKVTNANARIRSEENEXXXXXXXXXXXXXXXXXXXXXXXXXXXXXXXXXXXXXXXXXXXXXXXXXXXXXXXXXXXXXXXXXXXXXXXXXXXXXXXXXXXXXXXXXXXXXXXXXXXXXXXXXXXXXXXXXXXXXXXXXXXXXXXXXXXXXXXXXXXXXXXXXXXXXXXXXXXXXXXXXXXXXXXXXXXXXXXXXXXXXXXXXXXXXXXXXXXXXXXXXXXXXXXXXXDKATWKSNYFLKLVQLFDEYPKCFIVGVDNVGSKQMQHIRIALRGQAVVMMGKNTMMRKAIRGHVETNPALEKLLPHIKGNVGFVFTKCDLSEIRKVISENRVAAPARAGAIAPLDVTLPAHNTGLGPEKTSFFQALAIPTKISRGTIEIQSDVKLIREGEKVGASEATLLNMLKISPFTYGLVIKQVYDSGTIFDPAILDVTDEDLRCRFMEGVANIASVSLAIGYPTAASAPHSIVNGFKNLLALAAVTNFKEAETMKELLSDPSKLXXXXXXXXXXXXXXXXXXXXXXXXXXXXXXXXXXXXXXXXXXXXXXXXXXXXXXXXXXXXXXXXXXXXXXXXXXXXXXXXXXXXXXXXXXXXXXXXXXXXXXXXXXXXXXXXXXXXXXXXXXXXXXXXXXXXXXXXXXXXXXXXXXXXXXXXXXXXXXXXXXXXXXXXXXXXXXXXXXXXXXXXXXXXXXXXXXXXXXXXXXXXXXXXXXXXXXXXXXXXXMLMPKKNRVAIYELLFKEGVMVAKKDYYAPKHVPNLQVIKAMQSLKSRGLVNEQFAWRHYYWYLTNEGIQYLRDFLHLPPEIVPATLKXXXXXXXXXXXXXXXXXXXXXXXXXXXXXXXXXXXXXXXXXXXXXXXXXXXXXXXXXXXXXXXXXXXXXXXXXXXXXXXXXXXXXXXXXXXXXXXXXXXXXXXXXXXXXXXXXXXXXXXXXXXXXXXXXXXXXXXXXXXXXXXXXXXXXXXXXXXXXXXXXXXXXXXXXXXXXXXXXXXXXXXXXXXXXXXXXXXXXXXXXXXXXXXXXXXXXXXXXXXXXXXXXXXXXXXXXXXXXXXXXXXXXXXXXXXXXXXXXXXXXXXXXXXXXXXXXXXXXXXXXXXXXXXXXXXXXXXXXXXXXXXXXXXXXXXXXXXXXXXXXXXXXXXXXXXXXXXXXXXXXXXXVRDKLNNLVLFDKATYDKLYKEVPNYKLITPSVVSERLKIRGSLARAGLQELLSKGLIKLVEKHHAQVIYTR--RGPRKHLKRLHAPKHWMLDKLGGVFAPRPSTGPHKMRECLPLVVFLRNRLKYALTYDEVKKIVNQRLIKVDGKVRTDKTYPAGFMDVITIEKTAENFRLIYDVKGRFTIHRITSQEAKYKLCKVKKIIIGLKGVPHLVTHDARTIRYPDPMIKVNDTVQVDIATGKIKDFIKFESGNLCMITGGHNLGRVGLVTHRERHPGGFDIVHIKDSMGHSFATRLNNVFIIGKGNKPWVSLPAGKGLRLTIAEERDKRMKLNISYPATGCQKLIEVDDEHKLRHFYEKRMAAELPADRLGDEWKGYIVRISGGNDKQGFPMKQGVLTSGRVKLLLSKGHSCFRPRRSGERRRKSVRGCIVDANLSVLNLVIVRKGVNDIPGLTDKTIPRRLGPKRASKIRKLFNLSKEDDVRQYVVRRPLPEREGKKTKAPKIQRLVTPLVLQRKRDEFETSISQALLELEMNSDLKAQLRELYITAAKEKKAIILFVPVPQLKAFQKIQTRLVRELEKKFSGKHVVVIAQRRILPKPTRKNKQKRPRSRTLTAVHNNILDDLCFPAEIVGKRIRICLDGSRVIKVHLDKTQQTNVEHKLDTFSAVYKKLTSKEVTFEFMGISRDKWHKRRKTGGRMNPIRKKRKFELGRPAANTKLMPKRIHTVRTRGGNKKYRALRLDMGNFSWGSEAITKKTRITDVVYNASSNELVRTKTLVKNCIAVIDASPFRLWYEAHYAMPLIKKKGAKQKRSKKAKAKYIERRKTARIEPALEDQFATGKLYACVASRPGRCGRCDGYILEGKELEFYMKKIKAKKXXXXXXXXXXXXXXXXXXXXXXXXXXXXXXXXXXXXXXXXXXXXXXXXXXXXXXXXXXXXXXXXXXXXXXXXXXXXXXXXXXXXXXXXXXXXXXXXXXXXXXXXXXXXXXXXXXXXXXXXXXXXXXXXXXXXXXXXXXXXXXXXXXXXXXXXXXXXXXXXXXXXXXXXXXXXXXXXXXXXXXXXXXXXXXXXXXXXXXXXXXXXXXXXXXXXXXXXXXXXXXXXXXXXXXXXXXXXXXXXXXGKLIAVIGDEDTCTGFLLGGIGELDKHRQPNFLVVNKDTSISELEEAFRKFTTRSDIAIVLINQNAAEMIRHEIDSYTIPAILEIPSKEFPYDPSKDSILRRAKGMFSADDDSNIRLWVFLPIVIITFLVGIIRHYATILLMSDKDSQALIRSKILRENGRFIPKESFLTRKDFFNNEHTGFFNTQNPMTDPSMMTDMMKGNMTNVLPMIIIGGWINWAFSGFLTTKVPFPLTLRFKPMLQRGVELSSLDASWVSSASWYFLNVFGLRSMYSLILGQDNAADQTRMMQDQMTGMATGMPQDTMGDRYNIHSQLEHLQSKYIGTGHADTNKWEWLTNQHRDSFASYIGHFDLVNFFAVAENEAKARVRFNLMEKMLQPCGAPPERPEDXXXXXXXXXXXXXXXXXXXXXXXXXXXXXXXXXXXXXXXXXXXXXXXXXXXXXXXXXXXXXXXXXXXXXXXXXXXXXXXXXXXXXXXXXXXXXXXXXXXXXXXXXXXXXXXXXXXXXXXXXXXXXXXXXXXXXXXXXXXXXXXXXXXXXXXXXXXXXXXXXXXXXXXXXXXXXPPGDAERGKKIFIQRCAHCHSVEAGGKHKQGPNLHGFIGRKTGQAPGYTFTEANLKKGIIWDKETLDIYLENPKKYIPGTKMIFPGLKKKADRADLIAYLEESTXXXXXXXXXXXXXXXXXXXXXXXXXXXXXXXXXXXXXXXXXXXXXXXXXXXXXXXXXXXXXXXXXXXXXXXXXDPFADDEGSDGYIHIRIQQRNGRKTLTTVQGISSEFDLKKIVKVAKKEFACNGTVVEHPEYGEVIQLQGDQRQRISQFLKKFGLAREEQIKVHGFFEARLVQGSLLKKVLEAIKDLLNEATWDCNSTGMSLQAMDSSHVSLVSLQLRADGFDTYRCDRNLSLGINLSSMAKIMRCASNDDAITIKAGDDTVTYMFESPNGEKVSDYEMKLMDLDTEHLGIPETDYSCVVKMPSAEFQRICRDLSQIGESVTICCTKEGIKFSASGDLGTGNIKLAQTANVDKEEEAVVIEMQEAVTLTFALRYLNFFTKATPLSAQVSLSISADVPLVVEYKIGDVGYIRYYLAPKIXXXXXXXXXXXXXXXXXXXXXXXXXXXXXXXXXXXXXXXXXXXXXXXXXXXXXXXXXXXXXXXXXXXXXXXXXXXXXXXXXXXXXXXXXXXXXXXXXXXXXXXXXXXXXXXXXXXXXXXXXXXXXXXXXXXXXXXXXXXXXXXXXXXXXXXXXXXXXXXXXXXXXXXXXXXXXXXXXXXXXXXXXXXXXXXXXXXXXXXXXXXXXXXXXXXXXXXXXXXXXXXXXXXXXXXXXXXXXXXXXXXXXXXXXXXXXXXXXXXXXXXXXXXXXXXXXXXXXXXXXXXXXXXXXXXXXXXXXXXXXXXXXXXXXXXXXXXXXXXXXXXXXXXXXXXXXXXXXXXXXXXXXXXXXXXXXXXXXXXXXXXXXXXXXXXXXXXXXXXXXXXXXXXXXXXXXXXXXXXXXXXXXXXXXXXXXXXXXXXXXXXXXXXXXXXXXXXXXXXXXXXXXXXXXXXXXXXXXXXXXXXXXXXXXXXXXXXXXXXXXXXXXXXXXXXXXXXXXXXXXXXXXXXXXXXXXXXXXXXXXXXXXXXXXXXXXXXXXXXXXXXXXXXXXXXXXXXXXXXXXXXXXXXXXXXXXXXXXXXXXXXXXXXXXXXXXXXXXXXXXXXXXXXXXXXXXXXXXXXXXXXXXXXXXXXXXXXXXXXXXXXXXXXXXXXXXXXXXXXXXXXXXXXXXXXXXXXXXXXXXXXXXXXXXXXXXXXXXXXXXXXXXXXXXXXXXXXXXXXXXXXXXXXXXXXXXXXXXXXXXXXXXXXXXXXXXXXXXXXXXXXXXXXXXXXXXXXXXXXXXXXXXXXXXXXXXXXXXXXXXXXXXXXXXXXXXXXXXXXXXXXXXXXXXXXXXXXXXXXXXXXXXXXXXXXXXXXXXXXXXXXXXXXXXXXXXXXXXXXXXXXXXXXXXXXXXXXXXXXXXXXXXXXXXXXXXXXXXXXXXXXXXXXXXXXXXXXXXXXXXXXXXXXXXXXXXXXXXXXXXXXXXXXXXXXXXXXXXXXXXXXXXXXXXXXXXXXXXXXXXXXXXXXXXXXXXXXXXXXXXXXXXXXXXXXXXXXXXX
Meiopriapulus_sp               RISGQTVRSQNVVAAVSIANIVRTSLGPVGLDKMLVDDVGDVTITNDGATILKLLEVEHPAAKVLCELADLQDQEVGDGTTSVVLIAAELLKNADELVKCKIHPTSIISGYRLACKEACRYIQEHLTLSTDELGRESIVNAAKTSLSSKLIGPDSDFFASMAVDAANAVKDSKGQVKIPVNAVNVLKAHGKSSRESVLVAGYALNCTVASQQMPKRITNAKVACLDFGLQKTKMALGVQIVVDDPEKLEKIREREADITKERIQKILAAGANVVLTTGGIDDLCLKYFVEAGVMGVRRCKKPDLKRIAKATGAAFLTTLANLEGEESFDATMLGQAEEVVQERVCDDELIMIKRTASSIILRGANDFMCDEMERSLHDSLCVVKRVLESKSVVAGGGAVEVALNIYLENFATSLGSREQLAIAEFAHSLLVIPKTLAVNAAKDATDLVAKLRAYHNASQTHAQLKWVGLDLYEGAVKDNRKEGVLEPAISKIKQLKFATEAAITILRIDDLIKL-------------------------------------------------------------------------------------------------------------------------------------------------------------------MKNVDLRDIKVIKKLGGTVEDTEMVEGLALDHRGPKKMEKAKIGLIQFCISPPKTDMENQVIVSDYSQMDRVLREERQYILNIVKQVKKAGCNVLLIQKSILRDAVNDLALHFLDKMKIMVVKDIEREDIEFICKTLGCKPIASLDHFSPEMLGTADLVEDGAGKVVKITGIANQTVSVIVRGSNKLVLEEADRSIHDALCVIRCLVKKRALIAGGGAPEIELSLRMMEFANTLAGMEQYCFRSFAEAMEIIPFTLAENAGLNPIATVTELRNRHAQGEITAGINVRKCAISNILEENVVQPLLVSTSAVSLSTETVRSILKIDDIFDEFGRPFIILKDQDKKTRLTGLEAHKSHILAAKAVADILKTSLGPKGLDKMMVNPDGDVTVTNDGATILSMMDVDHEVAKLLVELSKSQDDEVGDGTTGVVVLAGALLEQAEQLLTRGVHPVRIADGYEMAARLAIEVLDKISETFPIDGNNEPLIETAVTTLGSKIVNKCGRRLAEIAVNAVLAVADLERKDVDFELIKVEAKVGGKLEDTMLVKGVVIDKDWSHPQMPKVLNDAKMAILTCPFEPPKPKTKHKLDVSSVEEYKELRKYEQEKFLEIVKHVKDAGANAVICQWGFDDEANHLLLANELPAVRWVGGPEIELIAIATGGRIVPRFSELTAEKLGRAGIMKEILFGTTKERMIVIEECHNSRAVTIFIRGGNKMIVEEAKRSIHDALCVVRNLVKDNRIVYGGGASEIACSLAVSQQADRISTLEQYAVRAFGDALETIPFALADNSGLPAIQTLTKVKARQVADNNPRLGIDCLNKGTFDMKTQHVIETLIGKKQQISLATQLVRMILKIDDIRAKDIKFGGEARALMLQGVDTLADVVALTMGPKGRNVILEQSWGAPKITKDGVTVAKAVELKDKYHNIGAKLVQDVANNTNEEAGDGTTAATILARAIAREGFEKINRGANPVETRKGIMNAVEVIVSELKKMSKQINTPEEIAQVATISANGDGNLISEAMKTVGNDGVITVKDGKTLNDELEIIEGMKFDRGYISPYFMNTPKGAKCDFQDALLLLSEKKISNIQQIVPALELANRRPLLIIAEDVDGEALSTLVLNRLKVGLQVCAVKAPGFGDNRKNQLHDMAVSTGSIVFGDEANLVKIEDVQLQDLGQVGEVSITKDDTLLLKCKGKKEDIDRRITQIKDELEVTNSEYEKEKLSERLSKLSNGVAVLKIGGSSEVEVNEKKDRVNDALNATRAAVEEGIVLGGGVALLRCIPALDTLSIENSDQKMGVEIVKKALRVPLHTIATNSGQDGAIIVEKVGYDALHDEFVDMAAKGIMDPTKVVRTALVDATGVASLLTTAEAVVTEIPKYNFKKIQVVPSAKDFVDIILSKTQRKTPTVVHRHYKISRIRQFYVRKVRYTQQNYHDRLTQILTDFPRLEEVHPFYADLMNVLYDKDHYKLALGQINTARHLIDNVSKDYVRLLKYGDSLYRCKQLKKAALGRMCTIMSRQKQSLEYLEQVRQHLSRLPTIDPNTRTVLICGFPNVGKSSFINKITRADVEVQPYAFTTKSLFVGHTDYKYLRWQVIDTPGILDHPLEERNTIEMQAITALAHLRACVLYILDISEQCGKSLEEQVSLFHNIQPLFANKPLLVVANKVDIIRPEELTEEGIVAVKTEACDQLLAHRVDVKVKGRKRINVAFPQKRDKERPPCIPRLERDIELEMGDDYILDLKKNYEKYDVIPEFWRGHNVADYIDP----------------------------------------------------------------------------------------------------------------------------------------------------NKMDDPTVNWDENRYNEIKDKLTPYLKRVGFSPKTEIFYIPVSGLTGAFLCNWYLGPSLIQYLDLPPVTRMAEGPVRIPIVDKYKDMGTIVLGKVESGVVTKGHSLLLMPNKVPVEVMQLWSDEVEVDSANPGENVKCKLKNVEEEDVMSGFVLCPQDNICCTGKVFDAQIVILEHRSIICAGYSAVMHIHTCAEEVTIQTLICLLDKRTGDKSRTRPRFIKQDQIAIVRFQICLEAFKDFPQMGRFTLRDEEIRALMEKKHNIRNMSVIAHVDHGKSTLTDSLVSKAGIIAEQKAGEARFTDTRKDEQERCITIKSTAISMFFELSDKDMKYMGFLINLIDSPGHVDFSSEVTAALRVTDGALVVVDCVSGVCVQTETVLRQAIAERIKPILFMNKMDLALLTLQLEQEDLYQTFVRIVENVNVIIATYGEGPMGNIMLEPTKGNVGFGSGLQSWAFTLKQFAELYASKFKVKLMSRFWGDNFYNPQTKKWRGFCMYVLDPIYRFDAIMHRKEETDKLMNKLLRSPEKDQEGKPLLKYVMRTFLPAGSTLLEMIAIHLPSPVTAQKYRMELLYEGPNDDEAARDCDPKGPLMMYISKMVPTTDKGRFYAFGRVFSGCVSSGYKVRIMGPNFVPGKKDDLTEKPIQRTILMMGRYVESIEDVPCGNICGLVGVDQFLVKTGTISTFAGAHNMKVMKFSVSPVVRVAVEPQNASDLPKLVEGLKRLAKSDPMVQCMFEDSGEHVVAGAGELHLEICLKDLEEDHACIPLKKSNPVVSYRESVGDESSVMCLSKSPNKHNRLYMKAKPFPDGLAESIDDGIHPRQEFKARAKMLAEKFDWDVTEARKIWTFGPEGTGPNLLVDVTKGVQYLNEIKDSVVAGFQWATKEGPLCEENVRGVRFNIHDVTLHTDAIHRGGGQIIPTARRCLYACLLTASPRIMEPVYLVEIQCPEMAVGGIYGVLNRRRGIVFEEAQTPGTPMFVVKAHLPVNESFGFTADLRSNTGGQAFPQCVFDHWQILPGDPRPREVVNETRKRKGLKESLPQVENYLDKLESGASKSYPQQCSALRKNGFVLLKGRPCKIVDMSTSKTGKHGHAKVHLVGIDLFSGKKYEDICPSTHNMSVPNVHRHDMQLIDIC-DGYLSLMEVGEVREDLKVPDSTILKAMEEECAIATRTYDLHITYDNYYRTPRLWLKGYDEHRKALTVEQMYEDFSQDHAKKTVTVESHHHLP-EHMPSIHPCRHADVMKKIIQTVESGGKELHVYLYLLIFLKFVQAVIPTIEYDY-----------------------------KIRIFDLGRKKARVDEFPLCIHLVSDEFEQISSEALEAGRICANKYLVKHCGKDSFHLRIRLHPFHVIRINKMLSCAGADRLQTGMRGAYGKPLGTVARVSIGQPIVSIRVKEQHKAQAIEALRRTKFKFPGRQKIFVSKKWGFTKWNQEENKEMRDEGRVASDGVHAKYYREHGPLFDRMGIREDLLRGIYAYGFEKPSAIQQRAIKPIVKGRDVIAQAQSGTGKTATFSISILQCLDTQVRETQALILSPTRELAGQIQKVILALGDYMSVQCHACIGGTNIGEDIRKLDHVVSGTPGRVFDMIRRRNLRTRAIKMLVLDEADEMLNKGFKEQIYDVYRYLQVCLISATLPHEILEMTSKFMTDPIRILVKRDELTLEGIKQFFVAVEREEWKFDTLCDLYDTLTITQAVIFCNTKRKVDWLTEKMREANFTVSSMHGDMPQKEREAIMKEFRSGASRVLITTDVWARGIDVQQVSLVINYDLPNNRELYIHRIGRSGRFGRKGVAINFVKNDDIRILRDIEQYYSTQIDEMPMNVADLIFENNNEVGVFSKLTNTYCMVAIGGSENFYSVFEGELADIVPVIHTSIAGCRIIGRLTVANRHGLLVPNTTTDQELQHIRNSLPDSVKIQRVEERLSALGNVIACNDYVALVHPDLDRETEEILSDVLNVEVFRQTIANNVLVGTYCSLNNQGGLVHPKTSVDDQDELSSLLQVPLVAGTVNRGSEVIGAGMVVNDWVAFCGLDTTSTEISVIDSVFKLSVAPAIYGSPDIKKAIACLLFGGSRKIMPDGLARRGDINLLLLGDPGTAKSQLLKFVEKVSPIGVYTSGKGSSAAGLTASVNRDPTTRNFVMEGGAMVLADGGVVCIDEFDKMREDDRVAIHEAMEQQTISIAKAGITTTLNSRCSVLAAANSVFGRWDDTKGEENIDFMPTILSRFDMIFIVKDEHCGPRLSAEAAEKLKNRYVLMRAGSLEHERETNKRTSIPITVRQLEAIVRISESLAKLQQLPFATEAHVDEALRLFRVSTLDAAMSGKLAGAEGFTTQEDQELLNRIEKQMKRRFAIGSQVSEHAIVQDFVRQKYPEAAVYKVLQFMLRRGELQHRMQRKMLYRLQKAIDLVTKATEEDKNKNYDEALRLYEHAVEYFLHAMKYEAQNDRAKETIRAKCIQYLERAEKLKKKLTNQLQGAIVMETPNVRWSDVAGLDGAKETLKEAVILPIKFPHLFSGKRQPWRGILLFGPPGTGKSFLAKAVATEADNSTFFSVSSSDLMSKWLGESEKLVRSLFEMARENKPSIIFIDEVDSLCSARSDSESESGRRVKTEFLVQMQGVGNNNDKVLVLGATNIPWALDAAIRRRFEKRIFIPLPDEAGRVHMFKLHLGTPNSLLGKKSDGYSGADISIVVRDALFQPVRKVQTATHFRKVRGPSRDDPSITVDDLLTPCSPGTPGAIEMTWMDVPGEKLLEPVVTMNDMSQSLVTVKPTVNEDDLRKIQTFMDDFGSEGRKIFVPPNRITPLKESWMKIYEPVVERLQLQIRFNLNTRNVEIRTCQETDLHAIQKAADFVKAFSLGFDIDDSLALIRLDDLYLESFDITDVKPLKGDHLARAVGRLAGTGGKTKFTIENVTKTRIVLADTKVHILGSFQNIKSARAVCNLILGSPPSKVYGXXXXXXXXXXXXXXXXXXXXXXXXXXXXXXXXXXXXXXXXXXXXXXXXXXXXXXXXXXXXXXXXXXXXXXXXXXXXXXXXXXXXXXXXXXXXXXXXXXXXXXXXXXXXXXXXXXXXXXXXXXXXXXXXXXXXXXXXXXXXXXXXXXXXXXXXXXXXXXXMFMTRSEYDRGVNTFSPEGRLFQVEYAIEAIKLGSTAIGILTAEGVVLCVEKRITSSLMVASSIEKIVEIDTHIGCAMSGLIADSKTMVDRARVEARNHWFTYNEPMDVESVTQAVSNLAIQFGDDDPDSMSRPFGVALLFGDKGPQLLHMDPSGTYVQCDAKAIGSGSEGAQHSLLQVYNKSMSLKEALKQALTILKQVMEEKLSATNVEYDRAITVFSPDGHLFQVEYAQEAVKKGSTAVGICGKDVVVIAVEKKSVAKLQEERTVRKICLLDDHVVMAFAGLTADARVIVNKARLECQSHRLLVEDPVTIEYITRHIATLKQRYTQSNGRRPFGISTLIAGFDYDGPHLYQTDPAGVYHEWKANSIGRNSKTAQEYLEKNYNSDITSSDVETIKLAIKALLEVTQSAGKNMELAVIRYDTRTTIFSPEGRLYQVEYAMEAIGHAGTCLGILAKDGVLLAAEKRNTHKLLDELAFSEKIYKLNRDMACSVAGITSDANVLTNELRLIAQRHMLQYQE-------------------------------------------------------------------------------------------------------------------YSFSLTTFSPSGKLVQIEYALAAVAAGAPSVGIKASNGVVIATEKKHKSMLYEEHSVYKVEQVCDHVGMVYSGMGPDFRVLSKRARKIAQKYYLMYSEQIPTAQLVQEVALVMQEYTQSGGVRPFGVSLLIAGWKPALFQCDPSGAYFAWKATAMGKNFISGKTFLEKRYNEDLELDDAVHTAILTLKESFEGQVTENNIEVGVSGFRRLTPAEIKDAGFDRHITIFSPEGRLYQVEYAFKAINQGGLTSVAVRGKDSAIVVTQKKVPDKLLDPSTVTHLFQLTENVGCVMTGMLADSRSQVQRARYEAANWKYKYGYEIPMDMLCRRIADISQVYTQSAEMRPLGCSMILIAYDDEGPQVYKTDPAGYFCGYKATSAGVKQLEANSFLEKKAKKKEAIEVAITCLSSVLSADFKQI---------------------QLSKDELACVYAALILVDDDVGITSEKISTILKAAGVDVEPFWPGLFAKALEGVDVRQLITNAGSSKVSRDTLYEAVGAVLETSKKRHFLETVELQINLKNYDPQKDKRFSGTIKLKHIPRPKFKVCMLGDQQHCDEAQANKIPSMDVEALKKLNKNKKLVKKLAKSYDAFLASDSLIKMIPRLLGPGLNKAGKFPTLLTHNESMKLEEVKATIKFQMKKVLCLAVAVGHVRMTDDQLVQNINLAINFLVSLLKKNWQNVRSLYIKSTMGPSQRLYMPPKFDPNEVKFIYLRAVGGEVGATSALAPKIGPLGLSPKKVGDDIAKATGDWKGLRICVQLRVQNRQAQVSVVPTASALVIKALKEPPRDRKKVKNIKHTGNLAFEEVVNIARQMRKSMSRYLSGTVKEILGTCQSVGCTVDKCHPHDVIEKIDSGDYEVPMGAYKYIQELYRKKQSDVMRFLLRVRSWHYRQLSTVHRASRPTRPDKARRLGYRAKQGFVVYRVRVRRGGRKRPVPKGATYGKPTNHGVNQLKNQRSHQAIAEERIGRYCKALRVLNSYWVAQDSTYKFYEVICVDPFHKAVRRDPNYQWICKPTAKHREMRGLTSASKKSRGLGKGHLFHKTIGGSRRAAWKRNNTQQMRRKRMTLYSAAPENPAKSAKAKGSHLRVHFKNTRETAQAVKGMHLRRAVHYLKNVIDKKEIVPFRRFNGGVGRKAQAKNWGTQGRWPQKSANFLLQLLKNAESNAEYKGLDTDHLMIEHIQVNRAPKMRRRTYRAHGRINPYMSSPCHIEVILAEKEMKTELCAFSGYKIYPGHGKKAVRVDGKAFTFISGKCEKLHMAKKNPRKITWTVLYRKKHKKGLQEEQEKRRVRRNIRYQRPIAGTSLTDILAKKNQKPEVRKAQREQAIRRKIHTSVHFRRPKTLRLPRNPKYPRKSVPHRNRLDAFSIIKHPLTTESAMKKIEDNNTLVFLVNLKANKPQIKAAVKKLYDIDVSKVNTLIRPDGQKKAYVRLAPDYDALDVANKIGIISHRKFSAPRHGSLGFLPKKRCRRHRGKVKAFPKDDQSKPIHLTAFLGYKAGMTHLVREVERPGSKLHKKETVDAVTIIETAPMVIVGVVGYIETPKGLRSFKTIYAEHLNEECRRRFYKNYKAKRKAFTKYAKKWQDDAGKKEIEKDFNKMKKYCKVIRVIAHTQMRLLKKRQKKAHIMEIQLNGGTIAQKVDWAREHFEKTVPIKNVFAPDEMIDIIGVTKGHGKKGVTSRWHTKKLPRKTHKGLRKVACIGAWHPARVAFSVARAGQKGYHHRTEVNKKIFRMADGKVVKNNASTDYDITEKTITPMGGFPHYGEVNQDYIMIHGATIGPKKRVLTLRKSLRTHTKRKALERISIKFIDTSSKFGHGRFQTRAEKKSAMNEVITREYTVHLHKRIHSVGFKKRAPRAIKEIRKFAVKQMGTPDVRVDTRLNKFLWSKGVRNVPYRVRVRLARKRNEDEDSPHKLYTLVTYVPVTGFKGLRTVNVDIIKKRRKKFIRHQSDRYRKLKPNWRKPKGIDNRVRRRFKGQYLMPNIGYGSAKKTKHMLPDGFRKVLVHNIKELEVLIMQNRRFCAEIGHSVSSKKRKTIVERAQQLAIKVTNANARVRSEENEKGHKTTRPSRRIGKRTKFVRDIVREVAGFAPYERRCMELLKVSKDKRALKFLKKRTGTHLRAKRKREEMSNVLVQMRKMTKGTSSFGKRNDKTHTLCRRCGRRSYHIQKSRCASCGYPSKRMRKFNWSEKAKRRRTTGTGRMRHLKVVHRRFKNKFREGXXXXXXXXXXXXXXXXXXXXXXXXXXXXXXXXXXXXXXXXXXXXXXXXXXX-----------------------------------------------------------------------------------------------------------------------------------------------------------------KVGASEATLLNMLNISPFSYGLAIEQVYDSGTVFAPAVLDITDDDIRKKFMTGVANVACLSLAIGYPTLASVPHLLINGFKNLVAISLQTDFKEAKTIKELLSDPAKL---------------------QMGKPLVTRTQGTKIASEGLKGRVFEVSLADLQQDEVTMRKFRLISEEVQGRNVLCNFHGMDMTTDKLRSMVKKWQTLVEAFVNVTTTDGYYLRVFCIGFTKKQMKKTCYAQSTQVRKIRAKMVDIMTREISNSDLKEVVNKLIPDSIGRDIEKACQSIYPLHDVYIRKVKVLKKPRFDMGKLLELHGTDGFEPPIQESVMLMPKKNRVSIYEYLFKEGVMVAKKDFNAPKHVPNLHVIKALTSLKSRGLVKEQFAWRHYYWYLTNDGIQNLRDFLHLPPEIVPATLKERAFQKQPTIFLNRKKSLRYTRNVGLGFKTPQEAIHGTYIDKKCPFTGNVSIRGRILTGVVLKMKMQRTIVIRRDYLHYVPKYNRFEKRHRNMSVHLSPCFRDVELGDVVTVGECRPLSKTIRFNVLKVTKHRIRITLTSRNVKSLEKVCEDLIRGAKDKKLKVKGPVRMPTKVLRITTRKTPCGEGSKTWDRYQMRIHKRLIDLHSPSEIVKQITSISIEPGVEVEVTIADTVRTRKFMTNRLLARRQMVVDVLHPGKASVPKTDIRERLAKTYRVTPDLVFAFGFRTQFGGGRSSGFALVYDSLDQAKKFEPKHRLARNGLLERKQRKERKNRMKKVRGTAKVRDKLNNLVLFDKGTYDKLYKEVPSYKLITPSVVSERLKVRGSLARAGLIELHKKALIRLVSKHGSQVIYTRVTRGPKKHLKRLNAPNHWMLDKLSGVFAPKPSAGPHKTRECLPLMVFLRNRLKYALTYDECKKILNQRLIKVDGKVRTDNTYPAGFMDVITIEKTAENFRLIYDVKGRFAVHRITPEEAKYKLCKVKRVALGPKGVPYCVTHDARTIRYPDPNIKVNDSVRVEIADGKIKDFIKFDSGNSCMITGGRNLGRVGTVVHRERHPGSFEIVHIKDAAGHSFATRLTNVFIIGKGTKPWVSLPRGKGVKLTIAEERDRRMKLNVSFPATGCQKLFEIDDEKKLRAFYDKRMSQEVGGECLGDEWKGYILQITGGNDKQGFPMKQGILTAGRVRLLLSKGHSCYRPRRSGERKRKSVRGCIVDSNLSVLSLVIVKKGDAEIPGLTDSTIPRRLGPKRASKIRKLFNLSKEDDVRQYVVRRPLPEKEGKRTKAPKIQRLVTPLVVQRKRDEFESSISQALLDLEMNSDLKAQLRELNISAAKEKKAIIIFVPVPQLRSYQKIHVRLVRELEKKFSGKHVVFVAQRRILPKPTRKSKQKRPRSRTLTAVHDAILEDLCYPAEIVGKRIRVKLDGSRLVKVHLDKSQQTNIEHKVDTFTAVYKKLTGKDVTFEFMGISRDKWHKRRKTGGRKNPIRKKRKFELGRPAANTKLGARRIHTVRTRGGNKKFRALRLDAGNFSWGSEATTRKTRIMDVVYNASNNELVRTKTLVKNCIIQIDATPFRQWYEAHYALPLARKKTSKLKRSKKTQKKYDERRKTAKVEQGLEEQFLSGRLLACLASRPGKCGRADGYILEGKELEFYLRKIKAKKLCSKAREILIEESNVQRVDSPVTVCGDIHGQFYDLKELFKVGGDVPETNYLFLGDFVDRGFYSVETFLLLLALKVRYPDRITLIRGNHESRQITQVYGFYDECLRKYGSITVWRYCTEIFDYLSLSAIIDDKIFCVHGGLSPSINTLDQIRAIDRKQEVPHDGPMCDL--------------------------------------------------------------------------GRLIAVIGDEDTCVGFLLGGVGEINKARQPNFMVVDKNTTAHEIEEKFKSFVQRDDIAIILINQYIAEQIRYVLDGYPVPAVLEIPSKDNPYDASKDSILRRAKGMFSADDDPAIRLWVVLPIVVITFIIGIIKHHASILMSSTKDSQAMFRSRMLRKNGKYINLQSFLMRKYYFNNEQSGYFLSQNMMTDPSMMTEMLKGNLTQVLPMIVIGGWINWTFSGFVTTKVPFPLTLRFKPMLQRGVELASLDAAWVSSASWYFLNVFGLRSIYILVLGENNAADQTKAMQDQMSGAAMAMPQDPXXXXXXXXXXXXXXXXXXXXXXXXXXXXXXXXXXXXXXXXXXXXXXXXXXXXXXXXXXXXXXXXXXXXXXXXXXXXXXXXXXXXXLVLVLGDLHIPHRCHNIPQKFKRLLVPGKIQHILCTGNLCTKESFDYLKTLASDVHLVRGDFDESYPEQKVVSVGQFKIGLCHGHQVIPWGDADSLSLLQRQLDVDILITGHTHKFEAFEHEGKFFINPGSATGAFNLLPSFVLMDMQSSTVVTYVYQLIGDEVKVERIEYKKPEGNAEKGKKIFKQRCEQCHTVEKGGKHKTGPNLHGLIGRKTGQARGFLYTDANITKGITWGKDTLFVYLENPKKYIPGTKMVFVGLKKPQERADLIAYLTESTXXXXXXXXXXXXXXXXXXXXXXXXXXXXXXXXXXXXXXXXXXXXXXXXXXXXXXXXXXXXXXXXXXXXXXXXXDPFAEAKGQENIIHIRIQQRNGRKTLTTVQGVASDYDLKKIVKACKKEFACNGTVVEHPEYGEVIQFQGDQRNNICEFLKKTGISKPEQLKVHGFFEARLVQGSLLKKVLEAIKDLVSEATFDCTGTGMSMQAMDGSHVSLVSMSLRADGFDNYRCDRNLSLGINLSSMSKVIKCASNDDVITIKADDDTVTFLFESPNQEKVSDFEMKLMNLDTDHLGIPDTDYSVIVKMPSGEFARICRDLSQIGDSVVICCTKAGVQFSAQGDLGTGNIKLAQNTAVDKEEDAVTVEMQEPVTLTFALKYLNYFTKATSLSGRVSLSMSPEVPLVVEYTMEDMGYMRYYLAPKIGFVHAVSGPVVTAKRMAGAAMYELVRVGHVELMGEIIRLEGDMATIQVYEETSGVTVGDPVLRTGKPLSVELGPGILDSIFDGIQRPLQDIFDLIKSIYIPRGVNVKSLDEKISWEYKTGNHITGGDIFGIVYENTLLKHRLMLPPKAKGTVTFIAPPGTYTINDVLLETEFDGEKSKFTAVQIWPVRQIRPFVEKLAANNPLLTGQRVLDALFPCVLGGTTAIPGAFGCGKTVISQSLSKYSNSDVITYVGCGERGNEMSEVLRDFPELTCEVGGKVESIMKRTTLVANTSNMPVAAREASIYTGITISEYFRDMGYNVSMMADSTSRWAEALREISGRLAEMPADSGYPAYLGARLASFYERAGRVKCLGNPAREGSVTIVGAVSPPGGDFSDPVTSATLGIVQVFWGLDKKLAQRKHFPSVNWLISYSKYMRVLDEYYDKNHPEFVPLRNKCREILQEEEDLSEIVQLVGKASLAETDKVTLEVSRLIKDDFLQQNGYSPYDRYCPFYKTAGMLQNMIGFYDMAKHAVESTSQSNKITWAIIRESMSDVLYQLSSMKFKDPVKDGESRIKADFAELYDRMQQEFRNLEDFPSPMANTIMKARLKGAQKGHSLLKKKADALTVRFRLVLKKIIEAKILMGEVMKEASFSLAEAKFTMGDFNLVVLQNVTRAQTKVRSKKDNVAGVTLPIFEHFAGGDTYEMAGLARGGQQLAKVKKTYAKAVELLVELASLQTSFVTLDEVIKITNRRVNAIEHVIIPKIENTISYIMSELDEREREEFFRLKKIQKKMPQNEHIELHRKRYGYRLDYHERKRKKEGRMAHEMAQKAKKLRGIKAKLYNKKRHAEKIQMKKTIKMHEERKTKAVPTYLLDREQTRAKVLSNMIKQKRKEKAGKWDVPLPKVKGVSEAEVFRVVKTGKTRRKGWKRMVTKVTFVGEGFTRKPPKYERFIRPMGLRFKKAHVTHPELKATFCLPIIGVKKNPSSPMYTSLGVITKGTVIEVNISELGLVTQGGKVIWGKYAQVTNHPENDGCINAVLL
Brugia_malayi                  XXXXXXXXXXXXXXXXXXXXXXXXXXXXXXXXXXXXXXXXXXXXXXXXXXXXXXXXXXXXXXXXXXXXXXXXXXXXXXXXXXXXXXXXXXXXXXXXXXXXXXXXXXXXXXXXXXXXXXXXXXXXXXXXXXXXXXXXXXXXXXXXXXXXXXXXXXXXXXXXXXXXXXXXXXXXXXXXXXXXXXXXXXXXXXXXXXXXXXXXXXXXXXXXXXXXXXXXXXXXXXXXXXXXXXXXXXXXXXXXXXXXXXXXXXXXXXXXXXXXXXXXXXXXXXXXXXXXXXXXXXXXXXXXXXXXXXXXXXXXXXXXXXXXXXXXXXXXXXXXXXXXXXXXXXXXXXXXXXXXXXXXXXXXXXXXXXXXXXXXXXXXXXXXXXXXXXXXXXXXXXXXXXXXXXXXXXXXXXXXXXXXXXXXXXXXXXXXXXXXXXXXXXXXXXXXXXXXXXXXXXXXXXXXXXXXXXXXXXXXXXXXXXXXXXXXXXXXXXXXXXXXXXXXXXXXXXXXXXXXXXXXXXXXXXXXXXXXXXXXXXXXXXXXXXXXXXXXXXXXXXXXXXXXXXXXXXXXXXXXXXXXXXXXXXXXXXXXXXXXXXXXXXXXXXXXXXXXXXXXXXXXXXXXXXXXXXXXXXXXXXXXXXXXXXXXXXXXXXXXXXXXXXXXXXXXXXXXXXXXXXXXXXXXXXXXXXXXXXXXXXXXXXXXXXXXXXXXXXXXXXXXXXXXXXXXXXXXXXXXXXXXXXXXXXXXXXXXXXXXXXXXXXXXXXXXXXXXXXXXXXXXXXXXXXXXXXXXXXXXXXXXXXXXXXXXXXXXXXXXXXXXXXXXXXXXXXXXXXXXXXXXXXXXXXXXXXXXXXXXXXXXXXXXXXXXXXXXXXXXXXXXXXXXXXXXXXXXXXXXXXXXXXXXXXXXXXXXXXXXXXXXXXXXXXXXXXXXXXXXXXXXXXXXXXXXXXXXXXXXXXXXXXXXXXXXXXXXXXXXXXXXXXXXXXXXXXXXXXXXXXXXXXXXXXXXXXXXXXXXXXXXXXXXXXXXXXXXXXXXXXXXXXXXXXXXXXXXXXXXXXXXXXXXXXXXXXXXXXXXXXXXXXXXXXXXXXXXXXXXXXXXXXXXXXXXXXXXXXXXXXXXXXXXXXXXXXXXXXXXXXXXXXXXXXXXXXXXXXXXXXXXXXXXXXXXXXXXXXXXXXXXXXXXXXXXXXXXXXXXXXXXXXXXXXXXXXXXXXXXXXXXXXXXXXXXXXXXXXXXXXXXXXXXXXXXXXXXXXXXXXXXXXXXXXXXXXXXXXXXXXXXXXXXXXXXXXXXXXXXXXXXXXXXXXXXXXXXXXXXXXXXXXXXXXXXXXXXXXXXXXXXXXXXXXXXXXXXXXXXXXXXXXXXXXXXXXXXXXXXXXXXXXXXXXXXXXXXXXXXXXXXXXXXXXXXXXXXXXXXXXXXXXXXXXXXXXXXXXXXXXXXXXXXXXXXXXXXXXXXXXXXXXXXXXXXXXXXXXXXXXXXXXXXXXXXXXXXXXXXXXXXXXXXXXXXXXXXXXXXXXXXXXXXXXXXXXXXXXXXXXXXXXXXXXXXXXXXXXXXXXXXXXXXXXXXXXXXXXXXXXXXXXXXXXXXXXXXXXXXXXXXXXXXXXXXXXXXXXXXXXXXXXXXXXXXXXXXXXXXXXXXXXXXXXXXXXXXXXXXXXXXXXXXXXXXXXXXXXXXXXXXXXXXXXXXXXXXXXXXXXXXXXXXXXXXXXXXXXXXXXXXXXXXXXXXXXXXXXXXXXXXXXXXXXXXXXXXXXXXXXXXXXXXXXXXXXXXXXXXXXXXXXXXXXXXXXXXXXXXXXXXXXXXXXXXXXXXXXXXXXXXXXXXXXXXXXXXXXXXXXXXXXXXXXXXXXXXXXXXXXXXXXXXXXXXXXXXXXXXXXXXXXXXXXXXXXXXXXXXXXXXXXXXXXXXXXXXXXXXXXXXXXXXXXXXXXXXXXXXXXXXXXXXXXXXXXXXXXXXXXXXXXXXXXXXXXXXXXXXXXXXXXXXXXXXXXXXXXXXXXXXXXXXXXXXXXXXXXXXXXXXXXXXXXXXXXXXXXXXXXXXXXXXXXXXXXXXXXXXXXXXXXXXXXXXXXXXXXXXXXXXXXXXXXXXXXXXXXXXXXXXXXXXXXXXXXXXXXXXXXXXXXXXXXXXXXXXXXXXXXXXXXXXXXXXXXXXXXXXXXXXXXXXXXXXXXXXXXXXXXXXXXXXXXXXXXXXXXXXXXXXXXXXXXXXXXXXXXXXXXXXXXXXXXXXXXXXXXXXXXXXXXXXXXXXXXXXXXXXXXXXXXXXXXXXXXXXXXXXXXXXXXXXXXXXXXXXXXXXXXXXXXXXXXXXXXXXXXXXXXXXXXXXXXXXXXXXXXXXXXXXXXXXXXXXXXXXXXXXXXXXXXXXXXXXXXXXXXXXXXXXXXXXXXXXXXXXXXXXXXXXXXXXXXXXXXXXXXXXXXXXXXXXXXXXXXXXXXXXXXXXXXXXKEHVNMVFIGHVDAGKSTIGGHLM-LTGMVDKRTLDKYEREAKDKGRESWYLSWALDTNDEEREKGKTVECGRAFFETDKKHFTILDAPGHKSFVPNMISGA-QADLAVLVISARKGEFETGFDRGGQTREHAMLVKTTGVKYL--LVNKMDDPTVNWDEERYKEIQNKLTPYLRKCGFNPKTDI-YIPVSGLTG---GSWYTGPCFIEYIDLPSISRDYEGPVRVIIADKYSDMGTIIIGKMESGVLVKGQTLTVMPNRTSIQVIQLWSDDVEVDKVVSGDNVKLKLKGIEDNDILPGFVLC---SPACVGRVFDAEVVILDHKSIIASGYSCVLHIQ---EEVIVKAVICTIDKKTGN--KVRARFVKQDEKCIMRLEFCLEAFK-FPQMGRFTLRDEXXXXXXXXXXXXXXXXXXXXXXXXXXXXXXXXXXXXXXXXXXXXXXXXXXXXXXXXXXXXXXXXXXXXXXXXXXXXXXXXXXXXXXXXXXXXXXXXXXXXXXXXXXXXXXXXXXXXXXXXXXXXXXXXXXXXXXXXXXXXXXXXXXXXXXXXXXXXXXXXXXXXXXXXXXXXXXXXXXXXXXXXXXXXXXXXXXXXXXXXXXXXXXXXXXXXXXXXXXXXXXXXXXXXXXXXXXXXXXXXXXXXXXXXXXXXXXXXXXXXXXXXXXXXXXXXXXXXXXXXXXXXXXXXXXXXXXXXXXXXXXXXXXXXXXXXXXXXXXXXXXXXXXXXXXXXXXXXXXXXXXXXXXXXXXXXXXXXXXXXXXXXXXXXXXXXXXXXXXXXXXXXXXXXXXXXXXXXXXXXXXXXXXXXXXXXXXXXXXXXXXXXXXXXXXXXXXXXXXXXXXXXXXXXXXXXXXXXXXXXXXXXXXXXXXXXXXXXXXXXXXXXXXXXXXXXXXXXXXXXXXXXXXXXXXXXXXXXXXXXXXXXXXXXXXXXXXXXXXXXXXXXXXXXXXXXXXXXXXXXXXXXXXXXXXXXXXXXXXXXXXXXXXXXXXXXXXXXXXXXXXXXXXXXXXXXXXXXXXXXXXXXXXXXXXXXXXXXXXXXXXXXXXXXXXXXXXXXXXXXXXXXXXXXXXXXXXXXXXXXXXXXXXXXXXXXXXXXXXXXXXXXXXXXXXXXXXXXXXXXXXXXXXXXXXXXXXXXXXXXXXXXXXXXXXXXXXXXXXXXXXXXXXXXXXXXXXXXXXXXXXXXXXXXXXXXXXXXXXDAGAATTYPKQCSALRKNENVMLKGRPCKVVEMSTSKTGKHGHAKVHLVGLDIFTGKKLEDICPSTHNMDVPVVKRKE-QLLSIN-DGYVSLME----KDDLKLPEGLVVAACGEEAILGTRTYDLHITYDKYYQVPRLWLCGYDEDNKPLTVDKMSADFSQDHINKTITMESHPYFR-TAMASIHPCRHAEVMKRLIEQLADSGKELSVDQYLLIFLKFVQAVIPTIEYDYXXXXXXXXXXXXXXXXXXXXXXXXXXXXXXXXXXXXXXXXXXXXXXXXXXXXXXXXXXXXXXXXXXXXXXXXXXXXXXXXXXXXXXXXXXXXXXXXXXXXXXXXXXXXXXXXXXXXXXXXXXXXXXXXXXXXXXXXXXXXXXXXXXXXXXXXXXXXXXXXXXXXXXXXXXXXXXXXXXXXXXXXXXXXXXXXXXXXXXXXXXXXXXXXXXXXXXXXXXXXXXXXXXXXXXXXXXXXXXXXXXXXXXXXXXXXXXXXXXXXXXXXXXXXXXXXXXXXXXXXXXXXXXXXXXXXXXXXXXXXXXXXXXXXXXXXXXXXXXXXXXXXXXXXXXXXXXXXXXXXXXXXXXXXXXXXXXXXXXXXXXXXXXXXXXXXXXXXXXXXXXXXXXXXXXXXXXXXXXXXXXXXXXXXXXXXXXXXXXXXXXXXXXXXXXXXXXXXXXXXXXXXXXXXXXXXXXXXXXXXXXXXXXXXXXXXXXXXXXXXXXXXXXXXXXXXXXXXXXXXXXXXXXXXXXXXXXXXXXXXXXXXXXXXXXXXXXXXXXXXXXXXXXXXXXXXXXXXXXXXXXXXXXXXXXXXXXXXXXXXXXXXXXXXXXXXXXXXXXXXXXXXXXXXXXXXXXXXXXXXXXXXXXXXXXXXXXXXXXXXXXXXXXXXXXXXXXXXXXXXXXXXXXXXXXXXXXXXXXXXXXXXXXXXXXXXXXXXXXXXXXXXXXXXXXXXXXXXXXXXXXXXXXXXXXXXXXXXXXXXXXXXXXXXXXXXXXXXXXXXXXXXXXXXXXXXXXXXXXXXXXXXXXXXXSIAPSIYGA-DIKKSIACLLFGGSRKRLPDGLTRRGDINILLLGDPGTAKSQLLKFVEKVAPIAVYTSGKGSSAAGLTASVRDP--SRSFIMEGGAMVLADGGIVCIDEFDKMREDDRVAIHEAMEQQTISIAKAGITTTLNSRCSVLAAANSVYGRWDDSKGDENIDFMPTILSRFDMIYIVKDTHCAPRLS--ASKKLIHNYVRLR---------------IPITVRQLEAIIRISESLAKMELLPFAEH--VDEALRLFRVSTIEAVASGNLIGIEGFTSSEDQES--RIERQLKKRFALGTHVSE--IVQDF--QNYPEMLVKVI--QCIRRGELQYRMQRKMLYR--------------------------------------------------------------------------------------------------------------------RKPWRGILLFGPPGTGKSYIAKAVATEANNSTFFSVSSSDLMSKWLGESERLVKQLFEMAREHKPSIIFIDEIDSLCSSRSDTESESARRIKTEFLVQMQGVGNDMEGILVLGATNIPWVLDAAIRRRFEKRIYIPLPEARK---MFKL-----------KTEGFSGYDISIVVREALMQPIRKVQTATHFKHVSGPSP-NCNIIVHDLLTPCSPGDPSAA--MFIDVPADKLAEP-LSMSDMLS--LMNKPTINKD--LKLMQF-KDFGQEGXXXXXXXXXXXXXXXXXXXXXXXXXXXXXXXXXXXXXXXXXXXXXXXXXXXXXXXXXXXXXXXXXXXXXXXXXXXXXXXXXXXXXXXXXXXXXXXXXXXXXXXXXXXXXXXXXXXXXXXXXXXXXXXXXXXXXXXXXXXXXXXXXXXXXXXXXXXXXXXXXXIKTPTNVKLLTNVAVVRMKKCGKRFEIACYKNKV-SWRNKTEKDIDEVLQTE-VFTNVSKGQVAKREELNTAFGDNQ-EICKIILEKGDLQVSEKERL-QSDSSFKELAN-IANMCVNPDTKRPYSSS-IENALHQTHLSLKPNRSVKQQALEVIPKL-XXXXXXXXXXXXXXXXXXXXXXXXXXXXXXXXXXXXXXXXXXXXXXXXXXXXXXXXXXXXXXXXXXXXXXXXXXXXXXXXXXXXXXXXXXXXXXXXXXXXXXXXXXXXXXXXXXXXXXXXXXXXXXXXXXXXXXXXXXXXXXXXXXXXXXXXXXXXXXXXXXXXXXXXXXXXXXXXXXXXXXXXXXXXXXXXXXXXXXXXXXXXXXXXXXXYDRAITIFSPDGHLFQVEYAQEAVKKGSTAVGVRGKNCVVIGVEKKSIPTLQDDRTIRKIHSIDEHVMLAFAGLSADARVLVDRARIECQSYKLTLEDPVTVGYIARFIANTKQRFTQSPGRRPFGISMLIG---FDGPRLFKTEPSGAYYEYSANSTGRGEKPVREYLEEHYE----------LKLVVKALSQVVQSG-QNIE-AVMXXXXXXXXXXXXXXXXXXXXXXXXXXXXXXXXXXXXXXXXXXXXXXXXXXXXXXXXXXXXXXXXXXXXXXXXXXXXXXXXXXXXXXXXXXXXXXXXXXXXXXXXXXXXXXXXXXXXXXXXXXXXXXXXXXXXXXXXXXXXXXXXXXXXXXXXXXXXXXXXXXXXXXXXXXXXXXXXXXXXXXXXXXXXXXXXXXXXXXXXXXXXXXXXXXXXXXXXXXXXXXXXXXXXXXXXXXXXXXXXXXXXXXXXXXXXXXXXXXXXXXXXXXXXXXXXXXXXXXXXXXXXXXXXXXXXXXXXXXXXXXXXXXXXXXXXXXXXXXXXXXXXXXXXXXXXXXXXXXXXXXXXXXXXXXXXXXXXXXXXXXXXXXXXXXXXXXXXXXXXXXXXXXXXXXXXXXXXXXXXXXXXXXXXXXXXXXXXXXXXXXXXXXXXXXXXXXXXXXXXXXXXXXXXXXXXXXXXXXXXXXXXXXXXXXXXXXXXXXXXXXXXXXXXXXXXXXXXXXXXXXXXXXXXXXXXXXXXXXXXXXXXXXXXXXXXXXXXXXXXXXXXXXXXXXXXXXXXXXXXXXXXXXXXXXXXXXXXXXXXXXXXXXXXXXXXXXXXXXXXXXXXXXXXXXXXXXXXXXXXXXXXXXXXXXXXXXXXXXXXXXXXXXXXXXXXX-MANQELACVYAALILQDDDVAITGDKISTILKAAHVDVEPFWPGLFAKALEG-DVKSLI-NISSXXXXXXXXXXXXXXXXXXXXXXXXXXXXXXXXXXXXXXXXXXXXXXXXXXXXXXXXXXXXXXXXXXXXXXXXXXXXXXXXXXXXXXXXXXXXXXXXXXXXXXXXXXXXXXXXXXXXXXXXXXXXXXXXXXXXXXXXXXXXXXXXXXXXXXXXXXXXXXXXXXXXXXXXXXXXXXXXXXXXXXXXXXXXXXXXXXXXXXXXXXXXXXXXXXXXXXXXXXXXXXXXXXXXXXXXXXXXXXXXXXXXXXXXXXXXXXXXXXXXXXXXXXXXXXXXXXXXXXXXXXXXXXXXXXXXXXXXXXXXXXXXXXXXXXXXXXXXXXXXXXXXXXXXXXXXXXXXXXXXXXXXXXXXXXXXXXXXXXXXXXXXXXXXXXXXXXXXXXXXXXXXXXXXXXXXXXXXXXXXXXXXXXXXXXXXXXXXXXXXXXXXXXXXXXXXXXXXXXXXXXXXXXXXXXXXXXXXXXXXXXXXXXXXXXXXXXXXXXXXXXXXXXXXXXXXXXXXXXXXXXXXXXXXXXXXXXXXXXXXXXXXXXXXXXXXXXXXXXXXXXXXXXXXXXXXXXXXXXXXXXXXXXXXXXXXXXXXXXXXXXXXXXXXXXXXXXXXXXXXXXXXXXXXXXXXXXXXXXXXXXXXXXXXXXXXXXXXXXXXXXXXXXXXXXXXXXXXXXXXXXXXXXXXXXXXXXXXXXXXXXXXXXXXXXXXXXXXXXXXXXXXXXXXXXXXXXXXXXXXXXXXXXXXXXXXXXXXXXXXXXXXXXXXXXXXXXXXXXXXXXXXXXXXXXXXXXXXXXXXXXXXXXXXXXXXXXXXXXXXXXXXXXXXXXXXXXXXXXXXXXXXXXXXXXXXXXXXXXXXXXXXXXXXXXXXXXXXXXXXXXXXXXXXXXXXXXXXXXXXXXXXXXXXXXXXXXXXXXXXXXXXXXXXXXXXXXXXXXXXXXXXXXXXXXXXXXXXXXXXXXXXXXXXXXXXXXXXXXXXXXXXXXXXXXXXXXXXXXXXXXXXXXXXXXXXXXXXXXXXXXXXXXXXXXXXXXXXXXXXXXXXXXXXXXXXXXXXXXXXXXXXXXXXXXXXXXXXXXXXXXXXXXXXXXXXXXXXXXXXXXXXXXXXXXXXXXXXXXXXXXXXXXXXXXXXXXXXXXXXXXXXXXXXXXXXXXXXXXXXXXXXXXXXXXXXXXXXXXXXXXXXXXXXXXXXXXXXXXXXXXXXXXXXXXXXXXXXXXXXXXXXXXXXXXXXXXXXXXXXXXXXXXXXXXXXXXXXXXXXXXXXXXXXXXXXXXXXXXXXXXXXXXXXXXXXXXXXXXXXXXXXXXXXXXXXXXXXXXXXXXXXXXXXXXXXXXXXXXXXXXXXXXXXXXXXXXXXXXXXXXXXXXXXXXXXXXXXXXXXXXXXXXXXXXXXXXXXXXXXXXXXXXXXXXXXXXXXXXXXXXXXXXXXXXXXXXXXXXXXXXXXXXXXXXXXXXXXXXXXXXXXXXXXXXXXXXXXXXXXXXXXXXXXXXXXXXXXXXXXXXXXXXXXXXXXXXXXXXXXXXXXXXXXXXXXXXXXXXXXXXXXXXXXXXXXXXXXXXXXXXXXXXXXXXXXXXXXXXXXXXXXXXXXXXXXXXXXXXXXXXXXXXXXXXXXXXXXXXXXXXXXXXXXXXXXXXXXXXXXXXXXXXXXXXXXXXXXXXXXXXXXXXXXXXXXXXXXXXXXXXXXXXXXXXXXXXXXXXXXXXXXXXXXXXXXXXXXXXXXXXXXXXXXXXXXXXXXXXXXXXXXXXXXXXXXXXXXXXXXXXXXXXXXXXXXXXXXXXXXXXXXXXXXXXXXXXXXXXXXXXXXXXXXXXXXXXXXXXXXXXXXXXXXXXXXXXXXXXXXXXXXXXXXXXXXXXXXXXXXXXXXXXXXXXXXXXXXXXXXXXXXXXXXXXXXXXXXXXXXXXXXXXXXXXXXXXXXXXXXXXXXXXXXXXXXXXXXXXXXXXXXXXXXXXXXXXXXXXXXXXXXXXXXXXXXXXXXXXXXXXXXXXXXXXXXXXXXXXXXXXXXXXXXXXXXXXXXXXXXXXXXXXXXXXXXXXXXXXXXXXXXXXXXXXXXXXXXXXXXXXXXXXXXXXXXXXXXXXXXXXXXXXXXXXXXXXXXXXXXXXXXXXXXXXXXXXXXXXXXXXXXXXXXXXXXXXXXXXXXXXXXXXXXXXXXXXXXXXXXXXXXXXXXXXXXXXXXXXXXXXXXXXXXXXXXXXXXXXXXXXXXXXXXXXXXXXXXXXXXXXXXXXXXXXXXXXXXXXXXXXXXXXXXXXXXXXXXXXXXXXXXXXXXXXXXXXXXXXXXXXXXXXXXXXXXXXXXXXXXXXXXXXXXXXXXXXXXXXXXXXXXXXXXXXXXXXXXXXXXXXXXXXXXXXXXXXXXXXXXXXXXXXXXXXXXXXXXXXXXXXXXXXXXXXXXXXXXXXXXXXXXXXXXXXXXXXXXXXXXXXXXXXXXXXXXXXXXXXXXXXXXXXXXXXXXXXXXXXXXXXXXXXXXXXXXXXXXXXXXXXXXXXXXXXXXXXXXXXXXXXXXXXXXXXXXXXXXXXXXXXXXXXXXXXXXXXXXXXXXXXXXXXXXXXXXXXXXXXXXXXXXXXXXXXXXXXXXXXXXXXXXXXXXXXXXXXXXXXXXXXXXXXXXXXXXXXXXXXXXXXXXXXXXXXXXXXXXXXXXXXXXXXXXXXXXXXXXXXXXXXXXXXXXXXXXXXXXXXXXXXXXXXXXXXXXXXXXXXXXXXXXXXXXXXXXXXXXXXXXXXXXXXXXXXXXXXXXXXXXXXXXXXXXXXXXXXXXXXXXXXXXXXXXXXXXXXXXXXXXXXXXXXXXXXXXXXXXXXXXXXXXXXXXXXXXXXXXXXXXXXXXXXXXXXXXXXXXXXXXXXXXXXXXXXXXXXXXXXXXXXXXXXXXXXXXXXXXXXXXXXXXXXXXXXXXXXXXXXXXXXXXXXXXXXXXXXXXXXXXXXXXXXXXXXXXXXXXXXXXXXXXXXXXXXXXXXXXXXXXXXXXXXXXXXXXXXXXXXXXXXXXXXXXXXXXXXXXXXXXXXXXXXXXXXXXXXXXXXXXXXXXXXXXXXXXXXXXXXXXXXXXXXXXXXXXXXXXXXXXXXXXXXXXXXXXXXXXXXXXXXXXXXXXXXXXXXXXXXXXXXXXXXXXXXXXXXXXXXXXXXXXXXXXXXXXXXXXXXXXXXXXXXXXXXXXXXXXXXXXXXXXXXXXXXXXXXXXXXXXXXXXXXXXXXXXXXXXXXXXXXXXXXXXXXXXXXXXXXXXXXXXXXXXXXXXXXXXXXXXXXXXXXXXXXXXXXXXXXXXXXXXXXXXXXXXXXXXXXXXXXXXXXXXXXXXXXXXXXXXXXXXXXXXXXXXXXXXXXXXXXXXXXXXXXXXXXXXXXXXXXXXXXXXXXXXXXXXXXXXXXXXXXXXXXXXXXXXXXXXXXXXXXXXXXXXXXXXXXXXXXXXXXXXXXXXXXXXXXXXXXXXXXXXXXXXXXXXXXXXXXXXXXXXXXXXXXXXXXXXXXXXXXXXXXXXXXXXXXXXXXXXXXXXXXXXXXXXXXXXXXXXXXXXXXXXXXXXXXXXXXXXXXXXXXXXXXXXXXXXXXXXXXXXXXXXXXXXXXXXXXXXXXXXXXXXXXXXXXXXXXXXXXXXXXXXXXXXLCDMLVTRLSHESNVVEITSPVTVCGDIHGQFYDLLKLFETGGR-PSTRYVFMGDYVDRGYYSLETLTYLFALMIRYPESITLLRGNHESRRISAVYGFYDECIQKYGHAMVWRCCCKVFDMLPVGALIDDHILCVHGGLSPEIKTLEKMFTLDRAVEIPSKGALCDLVWSDPEEEGWELSPRGAGWLFGQEVTKRFMH-NDLTLICRSHQLVLEGFKYIWDDILCTVWSAPNYCYRCGNEAXXXXXXXXXXXXXXXXXXXXXXXXXXXXXXXXXXXXXXXXXXXXXXXXXXXXXXXXXXXXXXXXXXXXXXXXXXXXXXXXXXXXXXXXXXXXXXXXXXXXXXXXXXXXXXXXXXXXXXXXXXXXXXXXXXXXXXXXXXXXXXXXXXXXXXXXXXXXXXXXXXXXXXXXXXXXXXXXXXXXXXXXXXXXXXXXXXXXXXXXXXXXXXXXXXXXXXXXXXXXXXXXXXXXXXXXXXXXXXXXXXXXXXXXXXXXXXXXXXXXXXXXXXXXXXXXXXXXXXXXXXXXXXXXXXXXXXXXXXXXXXXXXXXXXXXXXXXXXXXXXXXXXXXXXXXXXXXXXXXXXXXXXXXXXXXXXXXXXXXXXXXXXXXXXXXXXXXXXXXXXXXXXXXLVLVIGDFHIPHRSHNIP-RFRKLLVPNKMQHVLCTGNLCTRETFDYLKSLASDVHVARGDFDDTYPDTKVITVGQFRIGLCHGHQIVPWGDKKRLEMLARQMDVDVLITGHTHECQTFQHEGRFYVNPGSATGAFSPIPSFALLDVQMGTLITYLYRLVDDQVKVERVHFSKXXXXXXXXXXXXXXXXXXXXXXXXXXXXXXXXXXXXXXXXXXXXXXXXXXXXXXXXXXXXXXXXXXXXXXXXXXXXXXXXXXXXXXXXXXXXXXXXXXXXXXXXXXXXXXXXXXXXXXXXXXXXXXXXXXXXXXXXXXXXXXXXXXXXXXXXXXXXXXXXXXXXXXXXXXXXXXXXXXXXXXXXXXXXXXXXXXXXXXXXXXXXXXXXXXXXXXXXXXXXXXXXXXXXXXXXXXXXXXXXXXXXXXXXXXXXXXXXXXXXXXXXXXXXXXXXXXXXXXXXXXXXXXXXXXXXXXXXXXXXXXXXXXXXXXXXXXXXXXXXXXXXXXXXXXXXXXXXXXXXXXXXXXXXXXXXXXXXXXXXXXXXXXXXXXXXXXXXXXXXXXXXXXXXXXXXXXXXXXXXXXXXXXXXXXXXXXXXXXXXXXXXXXXXXXXXXXXXXXXXXXXXXXXXXXXXXXXXXXXXXXXXXXXXXXXXXXXXXXXXXXXXXXXXXXXXXXXXXXXXXXXXXXXXXXXXXXXXXXXXXXXXGFVYGVSGPVVTAEKMAGSAMYELVRVGHSELVGEIIRLEGDYATIQVYEDTSAVAIGDPVLRTGKPLSVELGPGIMGSIFDGIQRPLKDI---LTSIYIPKGVNVNVLSR---WEFTVGDHITGGDTIGFVRENVLINHRIMLPPIACGTITYIAAAGEYRVTDVVLETEFAGEK-KFTMLQIWPVRQPRPCAEKLAANFPLLCGQRVLDAMFPCVQGGTTAVPGAFGCGKTVISQSLSKFSNSDAIIYVGCGERGNEMSEVLRDFPELTMEVNG-TTSIMKRTTLVANTSNMPVAAREASIYTGITLAEYFRDMGLNVSMMADSTSRWAEALREISGRLGEMPADSGYPAYLAARLASFYERAGKVKCLGSPEREGSVTIVGAVSPPGGDFADPVTSATLGIVQVFWGLDKKLAQRKHFPSINWLISYSKY-RALDEYYDKNFPEFVALRTTCKEILQEEEDLSEIVQLVGKASLAESDKITLEVAKLIKDDFLQQNGYTPYDRFCPFYKTVGMLKNMI-FYDLAKHAVESTAQANKITWII--RDMSDIMYELSSMKFKDPVKDGEQKIKKDYDELLE-MQTAFRNLEEFPSRMAQTMMK-RLKAAQKGHSLLKKKADALNMRFR-ILGKIVENKNLMGEVLREASFSLAKAKF--GDFSHIVIQNVSRAQHRVLMKTENVVGV-LPVFDSYIDGDTYDLTGLGKGGANITKLKKNYNRAVELLVELATLQTCFITLDEAIKITNRRVNAIEHVIIPRIENTLVYIVTELDEMEREEFFRMKKIQQRMPQNEHIELHRKRHGRRLDYEERLRKRNARAGHE-SQYAKKIRGRKAK--HKKRYAEKVEMRRLLRQHEEKKQTVVPAYLLDRKQTTGKVLSSMIKQKRKEKAGKYQVPIPTVKAVSDAEAFKV-KTGKTRRKGWKRMVTKVTFVGESFTRKPAKFERFIRPMGLRFKKAHVTHPELQTTFQLPIVGVKKNPSSSLYTSLGVITKGTIIEVNISELGVVTQGGKVVWAKYAQVTNCPENDGCINAVLL
Hypsibius_dujardini            RTSGSNIRSQNVMAVSAIANIVKSSLGPVGLDKMLVDDIGDVTITNDGATILKLIEVEHPAAKILCELADLQDKEVGDGTTSVVILAAELLKNADELVKQKIHPTSIISGYLLACKEAVKYIQEHLVVPVDDLGRETFLSVARTSMSSKLIGPDSEFFGNMVVDAATAVRESKGSFKVPIKAVNVLKAHGRSSRESILVAGYALNCTVASQQMPRKITGAKIACLDFNLMRAKLAFGVQVLVTDPSKLEDIRNRESDITKERIQKILNAGANVILTTGGIDDLCLKYFAESGAMGVRRVKAADMKAIAKATGATFVMSLANMEGEESFDPAYLGYAEEIVQERICDDELILIKRTAASIILRGPNDFFVDEMERSIHDALCVVKRVMESKTVVVGGGAVETALSIYLENFATTLSSREQLAIAEFARALLVIPKTLAVNAAQDATELVAKLRAFHNSAQTHEYLKWYGLDLINGEVKDNRKLGVLEPTMSKVKSLKFATEAAITILRIDDMIKLKQKPTDIRFSNIQAGKSVADAIRTSLGPRGMDKMIQAGRGSVTITNDGATILKQMKVLHPAAQMLVELSQAQDVQAGDGTTSVVVVAGALLEAAAKLLTRGLHPMVISEAFQHAAEVSVNILMSQAVDLKDRASLIKIAKTSLNSKVVSQYSDVLAPIAVDAVLKVVDLKDIKLVQTLGSTVDESELVDGLVLTQRAPRRVEKAKVALIQFCLSPPKTDMENNVIVSDYTQMDRILREERAYLLNIVKQIKKANCNVLLIQKSILRDAVTDMALHYLAKMKIMVLRDIEREEIEFVSKSLGLRPIASLDHFVPEALASVDMVEQGTTKLVKFSGIAKKTVSVVVKGSNKLVLEEAERSLHDALCVIRCLVRERHLIVGGGAPEIELSIRLAEYSRTLVGAQAVCVRMFGEALEVIPNTLAENAGLNSIETVTELRNRHAAGDIQSGINVKRGTVSNIYEENVVQPLLVTTSCIQLASETVRSILKIDDIFDEFGKPFIILRNQDKKRRIVGIEALKSHIMAAKNVYNTLRTSLGPKGLDKVLVGPDGDVTITNDGATIMQEMRPSHEIAKLMVELAKSQDDEIGDGTTSVVVLAGALLEQAESLLDKGIHPIRIADGYEMAAALAVKHLESIAESLTFSKDNGALTDIASTTLGSKVVNRYRKELAKIAVEAVLSVADLEHRDVDFELIKIVTKVGAQLEDTMLIKGVLVDKDMSHPQMPKEIKDAHIAILTCPFEPPKPKTKHKLDVTTVEEYQKLREYEKQKFEQMVQQVKDAGANLVICQWGFDDEANHLLLQRELPAVRWVGGPEIELIAIATGGRIVPRFEELSKAKLGFAGSVKEISFGTARDRMLVIEGCPSSRAVTVFIRGGNKMIVDEAKRSIHDAICVVRNLVKDPRVVYGGGAADISCANVVAEAADKVPGLEQYSYRAFADALEVIPLALAENSGLNPIEAVSEVKARQIKEKNPRLGVDCMHKGTNDMKEQCVVEALIGKRQQILLATQLVRMILKIDDVRAKDIKFGKDARSSMLKGVDTLADAVAVTMGPKGRNVIIEQSWGSPKITKDGVTVAKAVELKDKYENIGAKLVQDVASSTNDEAGDGTTAATILARAIAKEGFERIVKGANPVEIRRGVMLAVEAVVAELRNQSKKVTSPAEIAQVATISANGDGDLISKAMERVGREGVITVKDGKTLNDELEVIEGLKFDRGYISPYFVNTPKGMKVEYQDAYVLFTEKKISSVQQIVPALEICHRKPLVIIAEDIDGEALGTLVLNRLKLSLQIVAVKAPGFGDNRKNMLKDMAIATGATVFGDEAEINKIEDVKLQDLGQVGEVTVTKDDTLLLKGRGEKSSIKKRVEAIKEEIEDSTSEYEKEKLNERLAKLSSGVAVLKVGGTSEVEVNEKKDRVTDALCATKAAVEEGIVAGGGVALIRCIPALDKLKPANNDQQLGIDIIRQALYVPCRQIAFNAGVDADQVVSKVGYNALTGEYVDMIKAGIIDPTKVVRTALSDAAGVASLLSTAEAVITEIPKYNFKKITVVPTSKDFVDIILSKTQRKTPTVVHRHYQISRIRSFYMRKVKFSQQSFHDKLSQIIQEFPKLEDIHPFYADLMNVLYDRDHYKLALGQINTARNLIDNVAKDYCRLLKYGDSLYRCKQLKRAALGRMATIMKRQASSLSYLEQVRQHLSRLPSIDPNTRTLLITGFPNVGKSSFINKVTRADVEVQPYAFTTKSLFIGHMDYRYLRWQVVDTPGILDQPLEERNTIEMQAITALAHLRAAVLYFMDISEQCGHTLEEQVKLFSSIKPLFANKPLVVVVNKIDIIRVEDLTGEGVMEVRQEACDLLLASRVEMKVKGKKRLHVAMPCKRDKERPACIPRLERDIELEQSEEYFLDLKKNYERWDVIPEVWNGKNIGDYIDRKEHLNIVFIGHVDAGKSTIGGHLLLQTGGVDKRTMEKNERDAKEAGRESWYLSWALDTNPEERDKGKTVEVGRSCFETSKKNFTILDAPGHKSYVQNMVEGASQADIGILVISARKGEFETGFERGGQTREHALLAKTTGVKQLVVVINKMDDPTVMWSEERYNECRDKLTPYLKQVGYNMKTDVVFMPLSGYTGANLCPFYDGPSLLGYLDLPPFPRSSDGPLRVPILGRFKEMGTVVTGKVESGSIRRGDQMLMMPNRIPVEAIQIWSDESEVDVAMGGDNVRVKLKGVEEDDVQAGFVLCDPVSPCTTGKIFDAQVAILEHKNILCAGYSAIMHMNALQEPVTISKIICLLDRRTGKKANVLPKFIKPGQLGIIRFEICMDVDT--SQLSKFTLRDEEVRAMMEKKTNIRNMSVIAHVDHGKSTLTDSLVSKAGIIAQSKAGEMRFTDTRKDEQERCITIKSTAISMFFELSEADAQLVGFLINLIDSPGHVDFSSEVTAALRVTDGALVVVDAVSGVCVQTETVLRQAIAERIKPILFMNKMDRALLELQLQQEDLYQTFARIAESINVIIATYSDGPMGDIKIDPSKGNCGFGSGLHGWAFTLKQFAEMYSAKFKIKLMRRLWGESFFNPVTKKWRAFNMFVLDPLYKFDAVMKDKEATAKLLEKLLKGEDKEK----------------------MITIHLPSPATAQKYRMELLYEGPMDDEAAKACDPKGPLMMYISKMVPTTDKGRFYAFGRVFSGVCATGQKVRIMGPNYVPGKKDDLYEKSIQRTVLMMGRNTEAIEDVPCGNICGLVGVDQFLVKTGTITTFKDAHNLKVMKFSVSPVVRVAVEPKNPADLPKLVEGLKRLAKSDPMVQIIIEESGEHIIAGAGELHLEICLKDLEEDHACIPIKTSDPVVSYRETVSEASSEICLSKSPNKHNRLYMSAVPMPDGLAEDIDSGITAKQEFKARGRVLADKYGWDVGEARKIWCFGPDTTGPNVLMDVTKGVQYLNEIRDSVIAGFQWSTKEGVLCEENCRGVRFNVHDVTLHADAIHRGGGQIIPTARRCLYACVLTAAPRLLEPVYLVEIQCPEAAVGGIYGVLNRRRGHVIEENQVVGTPMFVVKAYLPVNESFGFTADLRSNTGGQAFPQCIFDHWQILPGDPKPAEVVATTRKRKGLKEGIPELSNYLDKLDAGASTTYPMQCSALRKNGFVMLKGRPCKIVEMSTSKTGKHGHAKVHLVGLDIFTQRKYDDLCPSTHNMDVPNVKRVDYVLVNVQDDGFLSLMDDGDMREDLKLPEGTVLKACGEECVITTRTYDLHITYDKYYQTPRLWLIGYNEARKPLSVEQMYEDFSADHAKKTITMESHPHVSGPPMASIHPCRHAEVMKKIIQTVADGGRELDVHNYLVIFLKFVQAVIPTIEYDYMGRRPARCYRYCKNKPYPKSRFCRGVPDPKIRIYDLGRKKALVDEFPLCVHLVSDELEQLSSEALEAGRICCNKYLVKTCGKDSFHIRMRVHPFHVLRINKMLSCAGADRLQTGMRQAYGKPLGLAARVNIGQPIMSVRAKDVHKKEVIESLRRAKFKYPGRQKIFVSKKWGFTKFERGTYEEMRANGQLMPDGVICQYLPNHGTLXXXXXXXXXXXXXXXXXXXXXXXXXXXXXXXXXXXXXXXXXXXXXXXXXXXXXXXXXXXXXXXXXXXXXXXXXXXXXXXXXXXXXXXXXXXXXXXXXXXXXXXXXXXXXXXXXXXXXXXXXXXXXXXXXXXXXXXXXXXXXXXXXXXXXXXXXXXXXXXXXXXXXXXXXXXXXXXXXXXXXXXXXXXXXXXXXXXXXXXXXXXXXXXXXXXXXXXXXXXXXXXXXXXXXXXXXXXXXXXXXXXXXXXXXXXXXXXXXXXXXXXXXXXXXXXXXXXXXXXXXXXXXXXXXXXXXXXXXXXXXXXXXXXXXXXXXXXXXXXXXXXXXXXXXXXXXXXXXXXXXXXXXXXXXXXXXXXXXXXXXXXXXFESTNEIGVFTKLTNSYCLVAIGGAQNYYSLFEADLSETMPVIHTSIGGGRIIGRLTAGNRHGLLVPYATTDQELQHLRNSLPDSVGLQRVEERLSALGNVIACNDYVALVHPDLDRETEEIISDVLKVEVFRHAIAENVLVGSYCALSNQGGLVHSKTKIEDQDELSSLLQVPLVAGTVNRGSDVIGGGMVVNDWIAFCGLDTTSTEISVIESVFRLSIAPSIYGYPDIKKAVACLLFGGSRKRMPDGLSRRGDINILLLGDPGTAKSQLLKFVERVSPIGVYTSGKGSSAAGLTAAVIKDPTSNNFAIEGGAMVLADGGVVCIDEFDKMREDDRVAIHEAMEQQTISIAKAGITTTLNSRCSVLAAANSVFGRWDDSRGDSNMEFMPTILSRFDMIFIVKDVHCGPRLSDAAAEKLKHRYVLMRSGLRGQN--GEKPPAIPITIRQLEAVVRISESLAKMQLLPFAGIQHVDEALRLFQVSTLDAAASGSLSGADEFTTHDEQQLLSRIEAQIKRRFNIGSQVSVHNIVQEFSKQKYPESAIFKVISALVRRGEVQHRMQRKMLYRIAKAIDLVTKATEEDKKKNYAEALRLYQHGVEYFLHAIKYETNGDKAKESIRTKCTEYLERAEKLKKKLTKPLEGKVLIEKPNIKWDDVAGLELAKESLKEAVILPIKFPHLFTGKRTPWKGILLFGPPGTGKSFLAKAVASEANNSTFISVSSADLVSKWLGESEKLVKGLFDLARIKKPTIIFIDEIDSLCGQRSDTESESARRIKTEFLVQMQGVGNNTDGVLVLGATNIPWVLDAAIRRRFEKRIYIPLPDEAARVTIFKLNMDTPHTLLGAITDRYSGADISIVCREALMMPVRKVQTATHFKKVKGPSPSDPNKIV-DLYSPCSPGSPGAVEMSFHDVPGDQLLEPKITMNDMLRAVSQTKPAVTETDLIKLKEFTEEYGQEGRKIPVPANRYTPLKNNWTKLFAPVVEHLKLQMRFNLKSRNVELRPSPETDIGALQKGADFIKAFVLGFDVDDAMALIRLDDLFMESFEVTDVKPLKGDHLGRAIGRLAGKGGRTRFTIENVTKTRIVLADKVIQLIGSEQELQTERALRDVIMAAVSGKVHTIFTPTNQIRLTNVAIVRLKKAGKRFEIACYKNKVMSWRSGVEKDIDEVLQTHTVFTNVSKGEVAKKEDLLKAFADDQTEICKQILTKGELQVSDKERQSQLESSLKEIATIVAEKCVNPDTKRPYPVSMIETGMKDIHYSVKPNKSSKQQALDVIKQLKMFMTRSEYDRGINTYSPEGRLFQVEYAIEAIKLGSTAIGIQTKEGCVLAVEKRITSPLLEPSSIEKIWKVDEHIGCAVSGLIADARTLVEKARVEALSHWFSYNERMSVESVSQAVSNLAIGYGT----TLSRPFGVAMLFAHRKPQLWHMDPWTPL-------------------------DFTLKEALKHAVTILKQVMEEKINSINIEYDRAITVFSPDGHLFQVEYAQEAVKRGSTAIGIRGKDIVVLGVEKKAVAKLQVDRTVRKICLLDDHVVMCFAGLTADARILIDRARVECQSHKLTVEDPVTMEYIARFVAGIMQKYTQSLGRRPFGLSVLMAGFDYDGPHLYLSDPSGSYYEWKATAIGRNSKTVEEFLEKRYTDTVAASDEEVVRLAIRGLMEVVQSSAKNIEIAVLXXXXXXXXXXXXXXXXXXXXXXXXXXXXXXXXXXXXXXXXXXXXXXXXXXXXXXXXXXXXXXXXXXXXXXXXXXXXXXXXXXXXXXXXXXXXXXXXXXXXXXXXXXXXXXXXXXXXXXXXXXXXXXXXXXXXXXXXXXXXXXXXXXXXXXXXXXXXXXXXXXXXXXXXXXXXXXXXXXXXXXXXXXXXXXXXXXXXXXXXXXXXXXXXXXXXXXXXXXXXXXXXXXXXXXXXXXXXXXXXXXXXXXXXXXXXXXXXXXXXXXXXXXXXXXXXXXXXXXXXXXXXXXXXXXXXXXXXXXXXXXXXXXXXXXXXXXXXXXXXXXXXXXXXXXXXXXXXXXXXXXXXXXXXXXXXXXXXXXXXXXXXXXXXXXXXXXXXXXXXXXXXXXXXXXXXXXXXXXXXXXXXXXXXXXXXXXXXXXXXXXXXXXXXXXXXSGFDRYLTIFSPEGRLYQVEYAFKAISVTGHTSVGLKGTNLAVVVTQKKVPDRLLNPASVSNVYKLTESHGCVMTGLVGDARSQVDRARSEAAEWKYKYGYEIPLDMLCRRLADINQVYTQNAFMRPLGCSMMMIGYDAEGPQLYKTDPAGFYCGFRGIGVGAKQAEVNAFLEKALKAQEVIEMALNCFCTVMAQEFKASEMEVAIVTKDDTVFRVLSEKEMSTKEELACVYAALVLLDDDVAITGDKIATLLKAANIDVEPYWPDLFARSLEGVSLKELISSFGASKISRDGLYECVNGVLEEAKPRKFVETVELQIALKNYDPQKDKRFSGTVRLKHTPRPKYKVCVLGDEQHIDEANSHQIPAMSADDLKKLNKNKKLVKKLAKQYDAFLASDALIKQIPRLLGPGLNKAGKFPTLISHGENMKVDELKGTIKFQMKKVLCLAVAIGHVGMSNDELASNISLAVNFLVSLLKKNWQNVRSLHIKSTMGPPQQLYMPPKFDPNEIMIVYMRAIGGEIGATASLAPKIGPLGLSPKKVGEDIAKATQDWKGLKVTVKLTIQNRVAKIDVVPSAASLIIKALKEAPRDRKKVKNIKHSGNLTFDDIVDIARTMKRSMARKLEGVVKEILGTCQSVGCTVEGSNPHDIIEKINAKELDVPMGAYKYIQEMHRRKQSEVMRFLKRVRTWQYRQLNAIHRVSRPTRPEKARRVGYKAKQGYVVYRVRVRRGTRKRQAHKGQVYGKPSNQGINQLKWQRNLQSKAEERVGRRCPALRVVNSYWIGQDSTFKFYEVVLVDPHHNAIRHNAETQWLCKPVAKHREMRGLTSAGRKSRALGKGHKYNNTIGGSRRAAWKRHQKLSLLRKRMGRYSRESENPSQSCKAKGTDMRVHFKNTRETARAIKGMTLRRATAYLKNVVEKKEIIPYRRFTGHVGRKGQAKQFGTQGRWPKKSAEFLLSLLRNAESNGEYKSLNVENLVVDHIQINRAPKMRRRTYRAHGRINPFLSSPSHMEVILVEKEMKTELCHFSGYKIHPGRGIRTVRIDGKTLVFLNHKCQQGFLLHRNPREIRWTVLYRRKYKKGQQEEVAKKRVRRVVKVQRAIAGASIGEITAKRNQKPEVRKAQRDEAIKRKVRTAIAFRLPKTLKTARKPKFPRNAVPHRPRMDKFAVIDHPITTESAMKKIEEHNTLVFLVHLRASKPQIKAAVKSMYDVDVAKVNTLIRPDGFKKAYVRLLPDYDALDVANKIGIISHRKFSAPRHGSMGFCPKRRAKGIRGRVKAFPKDDQKKPIHLTAFLGFKAGMTHVVREVEKPGSKLHKKETVDAVTILETPPMVIVGVVGYIDTPKGLRKFKTVFAEHLSDDCRRRFYKSFRAKRKAFTRYSKKWQDPSGKADIERELAKIKKYCSVIRVIAHTQQKLLKKRQKKAHIMEIQLNGGTIAQKVDWAREHFEKPILITDVISEDEMIDIIGVTKGHGRKGVTSRWHTKKLPRKTHKGLRKVACIGAWHPARVSIFVARAGQKGFFHRTEINKKVYRIGKGLGAQNNAMTSADLTEKAITPMGGFKHYGIVNQDYVMLKGCVMGPRKRVITIRKSLLLQTKRAALEKIGLKFIDTSSKFGHGRFQTAAEKKGATNEVVTREHTIHLHKRLFQVGFKKRAPRAIKEIRKFAKES----------------------EVFLRVRVRLSRRRNEDEDSPHKLYTLVTWVPVEEFHGLQTNNVDVVKKRLKRFTRHQSDRYGKLAPSWRKPHGIDNRVRRRYKGTNRMPKIGYGSNKETRHVLPNGFRKVVVRNVQELEVLMMSNRTYCAEIASATSARKRKDIVTRAKQLSIRVTNANARLRAEEHERGHRTTRPSRMR-KHVKFVRDIAREVCGLAPYEKRTIELLRVGRDKRALKFLKRRLGTHLRAKGKRDEMSRTLTSQRKMTKGTSSFGMRHNKTHTLCRRCGKSSYHIQKHTCAACGYPSTRIRSYNWSVKAKRRRTTGTGRISHLRSVYRRFKNGFREGXXXXXXXXXXXXXXXXXXXXXXXXXXXXXXXXXXXXXXXXXXXXXXXXXXXDRTAWKAAYFTKLVELFEEYPRCFVVGVDNVGSKQMQQIRISLRGQAVVLNGKNTMIRKALRGNLESNPTLEKLLPHIKENIGFVFTKGDLAEVRTLLVANKVAAPAKAGALAPVDVKVPPQNTGLGPEKTSFFQALQIPTKIAKGTIEILTEVHLVKQGDRVGASEATLLNMLKIYPFSYGLVVRQVYDNGSTYDPSILDITPDVLRAKFLEGMSNVAALSLAVGYPTKVSVPHSVLNGYKNLIAVASTSDFKQAEKILEILKDPSKFIDPFTRKDWYDVRAPSMFNQRNIGKTIVNRTQGTKIASEGLKGRVFEVSQADLHKDENGFRKFRLMSEDVSGKNVLTNFHGMTITTDKIRSMVKKWQSLIEAHVDVKTTDGFLLRLFVIAFTKKTMRKTAYAQHAQIKEIRKRMVSIIQREVSTCDLKDVVSKLLPDSIAKDIEKASQGIYPLHDVHVRKVKVLKKPKFE---------------------MLMPKSQIRDIYEYLFMEGVLVAKKDVHLAKHIPNLHVMKCLNSLKSRGYVKEQFAWRHLYWYLTNEGIEFIRDYLNLPEEIVPNTMKERAFQKQPTIFLNKKKALRYVKNVGLGFKTPREASEGHYVDKKCPFTGGVHIRGRIFAGVVQKLKMQRTIVIRRDYLHYYRKYNRFEKRHKNMSVHMSPCFRDVNIGDVVTVGECRPLSKTVRFNVLKVTKRKIRITLTSTNVASLEKVCAEFVQKSKEKKVKTKGPVRIPTKVLRITTRKTPCGEGSKTWDRFQMRIHKRVIDLFSVPETVKQITSISIEPGVEVEVSIEGTIKTRHFMTNRLLRRKQMVVDIIHPGESTLKREQVREKVARLYKTTPDTVIVFGFKTQFGGGRTKGFALIYDSVDFAKKFEPKHRLVRAKLAERKQRKERKNRMKKVRGIKKTRDKLNNMVLMDKATEDKLRKEVVNYKLITPAILSERLKIRGSLARSVILLLQREGKIRPIIRHSAQLIYTRAGRGPKKHLKRLNAPKHWMLDKLGGVFAPRPSCGPHKLRESLPLIIFLRNRLNYALTGDEVKKILMQRLIKVDGKVRVDPTYPAGFMDVISIEKTNENFRLIYDTKGRYAVHRIQAEESKYKLCRAKSLGVGPKGVPFLVTSDGRTIRYPDPAIKISDTIQLDIATSKIIDFIKFEVGNLCMITGGHNLGRVGIVTSRERHPGSFDIVHVRDSTGHVFATRLNYCFIIGKGNKPYVSLPRGNGIRLSIAEERDARMKLNIAYPATGAQKLIEIEDEHKVRFFYDRRMGNEVAMDSLGDEWKGYTCRIAGGNDKQGFPMKQGVLTTGRVRLLMAKGVSCYRPRRTGERKRKSVHGCIVDSSLSVLSLVITKKGEGELPGITDKVVPRRLGPKRASHIRKLFNLTKDDDVRQFVVRRPLKEKEGKRTKAPKIQRLITPRRLQRKRTTFEQQISQFLVDLESSQDLKGSLQELFVNEAKEKNIIVLYVPPPQLRAWQKTHVRVVRELEKKLGGRPVIFIAKRRMLPKPTRKLSQKRPRSRTLTAVHENMLADIVFPAEIVGKRTRVKQDGSRLLKIHLDKASQVNVEHKVEVFASLYKKLTGKAVSFEFMGISRDNIHKRRKTGGKRAITRKKRKYELGRPAANTKIGVSRVHKVRVMGGNFKFRALRLDHGNFSWGSENTTRKTRIVDVVYNASNNELVRTKTLVKNAIVLIDATPFRTWYEAHYGIPLGRKKGAKLERKGKSLKKVQARQATGKVDPVMDDQFLSGRVLACVSSRPGQVGRCDGYVLEGKELEFYQKKLKSRKLIDFCSDILVEEPNVLDVDTPVTICGDIHGQFYDLEELFRTGGQVPNTKYIFMGDFVDRGYYSLETLTRLLTLKARYPTRIYLLRGNHESRQITQVYGFYDECLSKYGNANAWKAFCKLFDLMSIAALIDNSVLCVHGGLSPDITTLDQIRTIERNIEIPHKGSFCDLVWSDPDVDTWASSPRGAGWLFGQKVLKEFMDINKLDLLARAHQLVQEGIKYMFNDQLVTVWSAPNYCYRCGNVAXXXXXXXXXXXXXXXXXXXXXXXXXXXXXXXXXXXXXXXXXXXXXXXXXXXXXXXXXXXXXXXXXXXXXXXXXXXXXXXXXXXXXXXXXXXXXXXXXXXXXXXXXXXXXXXDPNIRTWVFVPIVVITFFIGIIRHYVSILLSSQK--EALLRSRLLRENGKYIPKSAFLMRKHYFNDKEAGVLKLANPMQDPNTLQDMLKGNLVNVLPMIAVGGWINWIFSGFVTTKVPFPLTWRFKDMLQRGINLPSLDPSWVSSASWYFLNVFGLRQIYSLVLGADNAADQTKFMEDQVS--VSGAPTDPMGDRYNIHSQLEHLQSKYIGTGHADTTKWEWMQNQHRDTVASILGHFDMLNHVAIAENENKARLKFNLIEKMLQPTGPPSQKKEDLVLVIGDFHIPFRASGLPAQFKKLLVPGKIQHIICTGNLCTKETLDYLRSLAGDVHVVRGDFDENYPDQKVVTVGQFRIGLCHGHQIVPWGDVESLGSLQRQLDVDVLITGHTHHFESLNRDGKLFLNPGTATGAWTGLPSFALLDIQSTTIVIYIYQLIGDEVKVEREEFRKPAGDAEKGKKIFVQRCAQCHTVEKGGKHKTGPNLSGLFGRKTGQAPGFDYTEANLKKGITWGKDTIFVYLENPAKYIPGTKMVFAGLKKKDERAHLIAYLEESTMQNDAGENVDLYIPRKCSSTNRIIASKDHAAVQINLVTGSIKGYAICGEVRRMGESDDSINRLAKSHNLLSKQDPFADAVTSEGLIHIRIQQRNGRKTLTTVQGIASQYDLKKIIRACKKSFACNGTVVEHPEYGEVIQFQGDQRNNICEFLTTNAIAKPAQLKVHGF------------------------------------------------------------------MGISLASMAKVLKCAGQEDNVIIKTDGSTVTFVFGNDDGDRTAEFELKLMNIDVEHLGIPETDYDCIIKMPSGEFKRLCGDLSQFGDSVAISCTKGEVRFEAQGDIGTGHIRLSKKGSADKPDEEISIELEQPVSLTFALKYLNNFAKATPLSATVRLCMSNNHPLCVEYPMPEVGHIRYYLAPKIGYVFGVSGPVVIAEKMAGAAMYELVRVGHEELVGEIIRLEGDMATIQVYEETSGVTVGDPVLRTGKPLSVELGPGILGNIFDGIQRPLQAICDFSNSIYIPKGVNVPCLSRTAQWNFKIGSHLTGGDVYGIVHENVFVNHKIMLPPRDKGKVTYIAPPGTYTIEDVILETEFDGEKKKFTLFQVWPVRQMRPVVEKLAANHPLLTGQRVLDSLFPCVQGGTTAIPGAFGCGKTVISQSLSKFSNSDVIIYVGCGERGNEMSEVLRDFPELTVEINGQVESIMKRTGLVANTSNMPVAAREASIYTGITLSEYFRDMGYNVSMMADSTSRWAEALREISGRLAEMPADSGYPAYLGARLASFYERAGRVTCIGNPAREGSVSIVGAVSPPGGDFSDPVTSATLGIVQVFWGLDKKLAQRKHFPSVNWLISYSKYMRALDDYYERHFPEFVPLRTKCKEILQEEEDLSEIVQLVGKASLAESDKITLEVAKLIKDDFLQQNGYTPYDRYCPFYKSVGMLRNMMAFYDLAKHAVESTAQSNRITWATIRESMSDTLYQLSSMKFKDPVKDGEAKIKADYDELLERMQQEFRNLEDFPSRMAQTLMKTRLKGAQKGHSLLKKKSDALTLRFRAILGKIIETKVQMGEVMKEAAFSLAETKFAAGDVNQTVLQSVSKAQIKVRTRKDNVAGVNLPVFEHYVEGDSHEYIGIAKGGEQIKKLKRNYLTAVKLLVDLASLQTSFVTLDEVIKVTNRRVNAIEHVIIPKIERTLAYIVSELDEREREEFFRLKKVQEKXXXXXXXXXXXXXXXXXXXXXXXXXXXXXXXXXXXXXXXXXXXXXXXXXXXXXXXXXXXXXXXXXXXXXXXXXXXXXXXXXXXXXXXXXXXXXXXXXXXXXXXXXXXXXXXXXXXXXXXXXXXXXXXXXXXXXXXXXXXXXXXXXXXXXXXXXXXXXXXXXXXXXXXXXXXXXXXXXXXXXXXXXXXXXXXXXXXXXXXXXXXXXXXXXXXXXXXXXXXXXXXXXXXXXXXXXXXXXXXXXXXXXXXX
Crassostrea_gigas              RTTGQSVRTQNVLAASSIANIVKSSLGPVGLDKMLVDDIGDVTITNDGATILKLLEVEHPAAKVLVELAELQDQEVGDGTTSVVIIAAELLKNADELVKCRIHPTSIISGYRLACKEACKYIQEHLTINVEELGKECIINAAKTSMSSKIIGSESDFFSNMVVDAANAIKDGKGGYKYPIK-----------------------------------------------LQKTKMKMGVQVLIENPDQLDGVRQREYDITKERIEKILAAGANVILTTGGIDDLCLKYFVEAGAMAVRRCKKVDLKRIAKATGGQLVMTLANLEGEESFDASMLGNAEEVVQDRICDDELLLVKRTAASIILRGANDFMCDEMERSVHDALCVVKRVL-------------------------------------------------------------------------------------------------------------------------------------------------------------------------------------------------------------------------------------------------------------------------------------------------------------------------------------------------------------------------------------------------------------------------------------------------------------------------------NPILTVLFGGSTKFVFEGADRSIHDALCVIRCLVKKRALIAGGGAPETELSLQLNDYANTLTGMEQYCFRAFAEALEVIPITLAENAGLNPIATVTELRNRHAQGEKTAGINVRKGAITNILEENVVQPLLVSTSAIHLATETVKSIMKIDDI--------------------------------------------------------------------------------------------------------------------------------------------------------------------------------------------------------------------------VIIDKDMSHPQMPKNIKDAKIAILTCPFEPPKPKTKHGLEVKSVEDYRKLREYELEKFESMVQQVKDTGSNLVICQWGFDDEANHLLLQKKLPAVRWVGGPEIELIAIATGGRIVPRFEELTKEKLGKAGIVRELSFGTTKERMLVIEDCNNSRAVTIFIRGGNKMIVEEGKRSIHDALCVIRNLVKDRRIVYGGGAPEISCSLAVAEAAKKISTLEQYAMKSFSEALESVPLALAENSGFAPIHTLADIKSRQIKENNPRLGIDCLNKGTNDMKTQSVIETLSSKRAQILLAVQLTKMILKIDDVRXXXXXXXXXXXXXXXXXXXXXXXXXXXXXXXXXXXXXXXXXXXXXXXXXXXXXXXXXXXXXXXXXXXXXXXXXXXXXXXXXXXXXXXXXXXXXXXXXXXXXXXXXXXXXXXXXXXXXXXXXXXXXXXXXXXXXXXXXXXXXXXXXXXXXXXXXXXXXXXXXXXXXXXXXXXXXXXXXXXXXXXXXXXXXXXXXXXXXXXXXXXXXXXXXXXXXXXXXXXXXXXXXXXXXXXXXXXXXXXXXXXXXXXXXXXXXXXXXXXXXXXXXXXXXXXXXXXXXXXXXXXXXXXXXXXXXXXXXXXXXXXXXXXXXXXXXXXXXXXXXXXXXXXXXXXXXXXXXXXXXXXXXXXXXXXXXXXXXXXXXXXXXXXXXXXXXXXXXXXXXXXXXXXXXXXXXXXXXXXXXXXXXXXXXXXXXXXXXXXXXXXXXXXXXXXXXXXXXXXXXXXXXXXXXXXXXXXXXXXXXXXXXXXXXXXXXXXXXXXXXXXXXXXXXXXXXXXXXXXXXXXXXXXXXXXXX-------------------------------------------------------------------------------------------------------------------------RCKQLKKAAMGRMCTIMKRQKQSLEYLEQVRQHLSRLPSIDPNTRTLLICGFPNVGKSSFINKITRADVEVQPYAFTTKSLYVGHTDYKYLRWQVIDTPGILDHSLEERNTIEMQAITALAHLRAAVLYVMDPSEQCGFSIEQQIELFNNIKPLFVNKPLIVCTNKTDVIRIEDLTEEGVM----------------------------------------------------------------------------------------------------------------------------------------------------------------------------------------------------------------------------------------------------------------------------------------------------------------------------------------------------------------------------------------------------------CTAKTFDAQIVILEHKSIICAGYSAILHIH---EEVTIKTLLCIIDKKTGE--KAQLKFVKQDQVAIARIEICLETFK-FPQMGRFTLRDEQIREIMDRKHNIRNMSVIAHVDHGKSTLTDSLVSKAGIIASAKAGETRFTDTRKDEQERCITIKSTAISLYYELKKDDLQYIAFLINLIDSPGHVDFSSEVTAALRVTDGALVVVDCVSGVCVQTETVLRQAIGERIKPVLFMNKMDLALLTLQLEAEPLYQVFQRIIENVNVIIATYGLNPMGDIAVDPKKGTVGFGAGLHGWAFTLKDFGAMYSKKFGIKLMKKLWGDNFYN----------------------------------------------------------------------------------------EGPDDDAAAKACDPKGVLMMYILKMVPTSDKGRFYAFGRVFSGTVATGMKARIMGPNYVPGKKEDLYEKSIQRTILMMGRYIEPIEDVPCGNICGLVGVDQYLIKTGTISTFKDAHNMRVMKFSVSPVVRVAVECKNASDLPKLVEGLKRLAKSDPMVQC-IEESGEHIIAGAGELHLEICLKDLEEDHACIPIKKSDPVVSYRETVSDESEIMCLSKSPNKHNRLFMKARPMADGLAEAIDDGITARQEMKERARILADKFGMDVGEARKIWCFGPEGTGPNILCDVTKGVQYLNEIKDSVVAGFQWATKEGVLCEENVRAARFDIHDVTLHADAIHRGGGQIIPTARRVLYACMLTAKPRIMEPIYLVEIQCPEQAVGGIFQCLNKRRGVVFDNQQIGSTPQFLVKAHLPVNESFGFTGDLRSCTGGQAFPQCVFDHWNVLAG-------------------------------DAGASKTIPCQCSSLRKNGYVCIKSRPCKIVEMSTSKTGKHGHVKVHLVGIDIFTGKKYEDICPSTHNMNVPLVDRRD-QLIDVL-DGTTSVMD----REDLNLPPGTVLNSMGEEQITGXXXXXXXXXXXXXXXXXXXXXXXXXXXXXXXXXXXXXXXXXXXXXXXXXXXXXXXXXXXXXXXXXXXXXXXXXXXXXXXXXXXXXXXXXXXXXXXXXXXXXXXXXXXXXXXXMGRRPARCYRYCKNKPYPKSRFCRGVPDPKIRIFDLGRKKARVDDFPLCVHLVSDEYEQLSSEALEAGRICANKYLVKNCGKDAFHMRMRVHPFHVIRINKMLSCAGADRLQTGMRGAFGKPQGTVARVHIGQPIMSVRARENHQGSVIEALRRAKFKFPGRQKIHVSKKWGFTKWDRPQYEEMRADGRLIPDGVNVQYKPNKGPLFDDMNLREELLRGIYAYGFEKPSAIQQRAIIPCIKGRDVIAQAQSGTGKTATFSIAILQQLNVEERDCQALVLAPTRELAQQIQKVVIALGDYMGASCHACIGGTNV--------NIVVGTPGRVYDMISRRALNPRNIALVVLDEADEMLSRGFKDQIYDIFIFMQVILVSATMP---------------------------------------------------------------------------------------------------------------------------------------------------------------------------------------------FEGNNEVGVFSKLTNAYCLVAIGGSENFYSVFEGELSETIPVVHCSLAGCRIIGRMCVGNKNGLLVPSSTTDQELQHIRNSLPDSVKIQRVEERLSALGNVATCNDYVALVHPDLDRETEEIVTDVLGVEVFRQTVADNVLVGTYSTISNQGGLVHPKTSIEDLEELSSLLQVPLVAGTVNRGSDVIGAGMCV-DWIAFCGL-----------------------------------------------------------------------------------------------------------------------------------------------------------------------------------------------------------CGPRLS--AAEKLKNRYVLMR---------------IPITVRQLEAIIRMSESLAKMKLKPFAGE--VDEALRLFQVSTLDAAMSGNLSGVEGFTTEEDQEL--RIEKQIKRRFIIGSQVSE--IIQDF--QKYPERSIKVL--HMLRRGEIQHRMQRKML--LQKAIELVTKATEEDKNKNYEEALRLYEHSVEYFLHAMKYEAQSEKAKDSIRK--CQYLDRAEKLKKK--SQLSGAI-VERPNIKWDDVAGLHMAKEALKEAVILPVKFPHLFTGKRKPWRGILLFGPPGTGKSYLAKAVATEANNSTFFSVSSSDLVSKWLGESEKLVKTLFSLARENKPSIIFIDEVDALCGSRSENESESARRIKTEFLVQMQGVGVDNDGVLVLGATNIPWVLDSAIRRRFEKRIYIPLPEART---MFKL-----------RTDGYSGADIQVVVRDALMQPVRKVQTATHFRRVRGPSR-DPNVIVDDLLTPCSPGAPGAE--MWTDAEGSKLLEP-VSMSDMLS--LATKPTVNED--LKLEEF-ADFGQEGRKIPIPSHRYTPLKENWMKIFTPIVEKLHLQIRFNLKTRNVEIKTCKDTDIGSLQKAADFVRAFTLGFEVDDGLALVRLDDLFLESFDVTDVKPLKGDHLSRAIGRIAGKNGKTKFTIENVTKTRIVLADSKIHILGSFSNIKIARAICNLILGSPPSKVYGYFQPTGQKRLTNVAVVRLKKGGKRFEIACYPNKV-SWRNKVETDIDEVLQTH-IFVNVSKGEVAKNEDLKKVFGDNQ-EICLQILKKGELQVSEKERH-QLESMFRDIAT-VSDKCVNPKTNRPYTVT-IEKAMKDLHFSVKPNKSTKQQALEVIKQL-MFLTRSEYDRGVNTFSPEGRLFQVEYAIEAIKLGSTAIGIQTSEGVVLAVEKRVTSPLIEASSIEKVFEVDEHIACAMSGLIADSRTLIDRARVEAQNHWFTYNAKMSVESVTQAVSNLALQFGDDDADAMSRPFGVALLFAKDGPQLFHMDPSGTFIQYDAKAI----------------------------------------------YDRAITVFSPDGHLFQVEYAQEAVKKGSTAVGVRGNNIVVLGVEKKAVAKLQEDRTVRKIALLDDHVALAFAGLTADARILINRARVECQSHKLTVEDPVTLEYITRYIAQLKQKYTQSNGRRPFGLSALIG---FDGPHLYQTDPSGTYHEWKANAIGRSAKPVREFLEKSYE----------IKLALKALLEVVQSG-KNVE-AVM----------------------------------------------------------------------------------------------------------------------------------------------------------------------------------GEMNLNDALLLAIKTLSKTLDMTKITADKVELATLTRYSFSLTTFSPSGKLVQIEYALAAVGAGAPSVGIKASNGVVLATEKKQKSILYDENSIHKIEMITKNVGMVYSGMGPDYRVLLRNSRKLAQNYFLAYQENIPTAQIVHKIANVMQEYTQSGGVRPFGVSLLIAGWRPYLYQCDPSGAYFAWKATAMGKNFVNGKTFLEKRYSDNLELEI---------------------------GFRRLTP-EVKDAGFDRHITIFSPEGRLYQVEYAFKAINQGGLTSVAIRGKDCAVVVTQKKVPDKLLDADTVTHLFQLTENLGCVMTGMVADSRSQVQRARYEAAKWKYNYGYEIPVDVLCKRIADISQVYTQSAEMRPLGCSMIVIGYDAEGPQVFKADPAGYYSGYKATAAGVKQLEANSFLEKKIKKKEAVEVAITCLSTVLSADFKSSEIEVGVVTSENPFFKKLTEEEMASSDELACVYAALILADDQVAITSDKIATILKAAGVSVEPYWPSLFSKALDG-NVKEMI-NISSSKINRDNLNESINAILQAVKPRKFTQSVELQIVLKNYDPQKDRRFAGTVRLRNIPRPKMKVCILGDQIHCDQAKANNLPCMTADDLKKLNKDKKLIKKLAKKYDAFLASDSLIKQIPKICGPGFNRAGKFPTQVSHQESLKVEEVKATIKFQLKKVLCLATCVGHVNMTKEELYGNITLAINFLVSLLKKNWQNVKALYIKGTMTPAQRIYMGPKFDPTAITIVYVKAVGGEVPATSSLAPKIGPLGLSPKKIGDDIAKGTADWKGLKITVKLVVQNRQAKVEVVPSASSLLIKSLKEPPRDRKKVKHVKHSGNLSMDDVIAIARQMRRSMAKNLAGTCKEILGTAQSVGCSVERCPPHDIIDKINSGEVEVPMGAYKYMQEIYRKKQSDILRFLLRVRSWQYRQLSSCHRAPRPTRPEKARKLGYKAKQGFVIYRVRVRRGGRKVPVPKGITYGKPTTSGVNQKKFQRSHRSIAEERVGKKCGGLRVLSSYWVAQDSSYKFYEIILVDPFHKTIRRDPKLQWICNPVHKHRELRGLTSAGKMSRGLGKGHRYTKTIGGSRRAAWKRNNLTKMRRKRMVRYATEPDNPTKSAKARGSYLRVHFKNTRETAQAIKRMHVKRATRYLKNVMAKKEVVPFRRFSGGVGRCAQAKAFKSQGRWPSKSAEFLLQLLKNAESNAEYKGLDTDHLVIEHIMVNAAPKMRRRTYRAHGRINPYMSSPCHIELILAEREMKIELCSYSGYKIYPGHGKRIVKVDGRVFQFLNGKCEASHMMKRNPREINWTVLYRRKHKKGNLEEIAKKRTRRATKFTRAVTGLSLAEIQAKRNQKPEVRKAQREQAIRKKFRPSVHFRRPKTLSLPRAPKYPKKSVSRVCKLDRFSIVKFPLTTESAMKKIEDNNTLVFIVDKRANKPQVKQAVKKLYDIDVAKVNTLVRPDGEKKAYVRLAPDYDALDVANKIGIISHRKFSAPRHGSKAFLPKKRSRRHRGKCKSFPKDDKSKPCHLTAFLGYKAGMTHIVREVDRPGSKSNKKEIVEAVTILETPPMMIVGVVGYIETPKGLRAFKTIFAEHLSEDCRRRFYKNYRAKKKAFTKYSKKWQDEAGKKEIERDFAKMKKYCKVIRVIVHTQMKLLKKRQKKAHIMEVQVNGGTVSQKVDWAKEKLEKAVNIDQVFSQDENIDCIGVTRGRGFKGVTSRWHCKKLPRKTHKGLRKVACIGAWHPSRVQYSVARAGQKGYHHRTEINKKIYRIGKGKVIKNNAATEYDPADKSITPMGGFPHYGEVNQDYVMIKGCCMGSKKRVITLRKSLLATFRKKAMEKINLKFIDTSSKYGHGRFQTFEEKKKVLTEVITKECTIHMHKRIHGIGFKRRAPRAIKEIRKFAEKMMGTPDVRVDTRLNKHIWSQGVRNVPYRVRVRLARKRNEDEDSVHRLYTLVTYVPCASFKGTQTINVDCVKKRTKKFIRHQSDRYLRVKSNWRKPKGIDNRVRRRFKGQYKMPNIGYGSNKKTRHVMPDGFKKFLIHNVKELEVLLMQNRTFAAEIAHNVSSKKRKDIVERAQQLSIKLTNPNARLRSEDDEKGHRTIRPTRRRGKHARFVRDLVREITGFAPYERRMQELLRIQKDKRALKFAKRRLGSHIRAKRKREEMQAVLQKMRKXXXXXXXXXXXXXXXXXXXXXXXXXXXXXXXXXXXXXXXXXXXXXXXXXXXXXXXXXXXXXXXXXXXXXXXXXXXXXXXXXMGAHKSYRTKMRLAKKQKQNRPVPQWVRMKTGNTIRYNAKRRHWRRTKL--DKPTWKSNYFLKISSLLDEYPKAFIVNADNVGSKQMQQIRQALRGKAIVLMGKNTMMRKAIRGHLDKNPQLERLLPHIKNNIGLVFLKGDLVETRDLLVANKVKAPAKAGALAPLDVHVPAQATTLGPEKTSFFQALQIPTKITRGCIEILNEVHLIKAGDKVGSSESTLLNMLGVSPFSYGLAVEKVYDSGTIFEPEILDITDSDLRDKFLLGVRNIAALSL----------------------------------------------VDPFTKKDWYDVKAPSMFVVRQIGKTLVTRTQGTRIASDGLKGRVFEVSLADLQNDEVSFRKFKLMAEEVQGRNVLTNFHGMDLTRDKLCSMVKKWQTMIQAHVDVKTTDGYLLRMFCIGFTKKQVKKTCYAQTTQIKSIRRKMVDIITKEVTSNDMKEVVNKLIPDSIGKDIEKACQGIYPLHDVFIRKVKVLKKPKFDIGKLMEMHGPEGYEPPVQQSVMLMPKKNRVQIFEYLFKEGVLVAKKDFSAPKHVPNLHVIKALTSLKSQGYVREQFSWRHYYWYLTNEGIQYLRDYLHLPAEIVPATLKXXXXXXXXXXXXXXXXXXXXXXXXXXXXXXXXXXXXXXXXXXXXXXXXXXXXXXXXXXXXXXXXXXXXXXXXXXXXXXXXXXXXXXXXXXXXXXXXXXXXXXXXXXXXXXXXXXXXXXXXXXXXXXXXXXXHRIRITLTSRNVKSLEKVCADLIKGAKEKSLKVKGPVRMPTKVLRITTRKTPCGEGSKTWDRFQMRIHKRLIDLHSPSEIVKQITSISIEPGVEVEVTIADTIRTRKFMTNRLLCRKQMIVDVLHPGKATIPKTEVREKLAKMYKTTPDVIFCFGFRTKFGGGKTSGFGLIYDSLDFAKKFEPKYRLQRHGLLERKQRKERKNRQKKVRGTKKVRDKLNNLILFDKATYDKFSKEVPTYKLITPSVVSERMKIRGSLAKQALRALHKEGKIKLVSKHHSQLIYTRVTRGRKKVLKRLTAPKSWMLDKLGGVFAPRPSTGPHKLRESLPLIVFLRNRLKYALTYDEVKKITMQRLIKVDGKVRTDKNFPTGFMDVISIEKTNENFRLLYDVKGRFTVHRIQKEEAKYKLCRVRKVGVAAKGVPYITTHDGRTIRYPDPLTKVNDTVMVDIATGKIKDFIKFDSGNLCMVTGGHNLGRVGVIQHRERHPGSFDIVHIKDSVGHTYATRLSYVFVIGKGNKPWISLPKGKGVKLSIAEERDRRMKLNISYPATGCQKLIEVDDEKKLRPFYEKRMASEVSADSLGDEWKGYVLRIAGGNDKQGFPMKQGILTNVRVRLLLSKGHSCYRPRRTGERRRKSVRGCIVDSNLSVLAMVIVKKGEKDIPGLTDTTIPRRLGPKRASKIRKLFNLSKEDDVRQYVVRRPLPPKEGKKTKAPKIQRLVTPVVLQRKRXXXXXXXXXXXXXXXXXXXXXXXXXXXXXXXXXXXXXXXXXXXXXXXXXXXXXXXXXXXXXXXXXXXXXXXXXXXXXXXXXXXXXXXXXXXXXXXXXXXXXXXXXXXXXXXXXXXXXXXXXXXXXXXXXXXXXXXXXXXXXXXXXXXXXXXXXXXXXXXXXXXMGISRDKWHKRRKTGGRMTQIRKKRKFELGRPAANTKLGARRIHTVRTMGGNKKYRALRLDTGNFAWGSEAITRKTRIIDVVYNASNNELVRTKTLVKSCIVQIDATPFRQWYEAHYAKPLGRKAGVKLTASKKTKRKYAEREKLAKVEHALDEQFSAGRVLAKVASRPGQCGRSDGYILEGKELEFYQRKLKTKK-------------------------------------------------------------------------------------------------------------------------------IIDECVLCVHGGLSPDIKTIDQIRTIERNQEIPHKGAFCDLVWSDPEVETWAISPRGAGWLFGAKVTNEFMH-NSLNLIRRAHQLVHEGYKYMFDEKLVTVWSAPNYCYRCGNIAGKLMAVIGDEDTCTGFLLGGIGELNKKREPNFLVVDKNTSRHDIEEAFRGFLKRDDIAIILINQTIAEEIRYVIDSHPIPAVLEIPSKDSPYDSSKDSILRRAKGMFSAEDDSDIRIWVFLPIVLITFFTGIIKHYVTILLSSEKDSHVLIRSRILRENGKFITKQGFLMRKSFFNAENTGYFKTENPMTDPSMMTDMLKGNVTNVLPMIVIGGWINWAFSGFLTTKVPFPLTLRFKPMLQRGVELVSLDASWVSSASWYFLNVFGLRSLYTLILGQDNSADQTKAMQEQMSGAGMMTPPDP---------------------------------NQHRDSCASYMGHQDMLSYFALAENESKARVRFNLMERMLQPCGPPPERPEDLVLVLGDLHIPHRCNSLP-KFKKLLVPGKIQHILCTGNLCTKESFDYLKTLASDVHVVRGDFDENYPEQKVVTVGQFRIGLCHGHQVVPWGDTESLALVQRQLDVDILISGHTHKFEAFEHENKFYINPGSATGAYNALPSFVILDIQQSTVVAYVYKLVQDDVKVERIEYKKXXXXXXXXXXXXXXXXXXXXXXXXXXXXXXXXXXXXXXXXXXXXXXXXXXXXXXXXXXXXXXXXXXXXXXXXXXXXXXXXXXXXXXXXXXXXXXXXXXXXXXXXMQNETGEFVDMYIPRKCSASNRIISAKDHASIQINIATGSYTTYAICGNIRRMGESDDSLIRLAKRDNLIAQNDPFKEASTQENLIHIRIQQRNGRKTLTTVQGISTDYDLKKIVKACKKEFACNGTVVEHPEYGEVIQLQGDQRNRIRDFLRDIGIAREEQLKVHGFFEARLVQGSLLKKLMEAIRDLIPEAIWDCSGTGITLQAMDNSHVALVAVNLRSDGFETYRCDRNLSMGMSLASMSKVLKCASNDDVITLKAGDDTVTFMFESPNNEKVSDYSLKLLDLDCEQLGIPDTEYSCVVKMPSHEFQRICRDLSQIGESMVICCTKEGVKFSASGDLGTGNVKLAQNASADKEEEAVIIEMNQAVTLTFALRYLNFFTKATPLSAQVHL---------VEYKIADMG---------------------------------------------------------------------------------------------------------------------------------------------------------------------------------------------------PVRQLRPVTEKLAGNHPLLTGQRVLDALFPCVQGGTTAIPGAFGCGKTVISQSLSKYSNSDVIIYVGCGERGNEMSEVLRDFPELTMEVEG-PESIMKRTALVANTSNMPVAAREASIYTGITLSEYFRDMGYNVSMMAYSTSRWAEALREISGRLAEMPADYGYPAYLGARLASFYERAGRVKCIGNPEREGSVSIVGAVSPPGGDFSDP----------------------------------------------------------------------------------------------------------------------------------------------------------------------------------------------------FPSRMAMAIMK-RLKGAQKGHSLLKKKADALTMRFR-ILKKIIETKVLMGDVMKEASFSLAEAKF--GDINHMVLQNVNKAQLKVRSKKDNVAGV-LPVFEGYQDGDSYELTGLSRGGQQIDRLKKNYARAIQLLVELASLQTAFVTLDEVIKITNRRVNAIEHVIIPRIERTLAYITSELDEREREEFYRLKKIQKKMPQNEHIELHRKRHGYRLDYHERKRKKEGRKAHE-AEKAKKLRGIRAK--NKKRHAEKVQMKKTIKMHEERKTKAVPAYLLDREQSRAKVLSNMIKQKRKEKAGKWDVPLPKVRGMSEAEVFKV-KSGKTKRKGWKRMVTKVCYVGEGFTRKPPKFERFIRPMGLRFNKAHVTHPELKATFCLPIIGVKKNPTSTMYTSLGVITKGTIIEVNISELGLVTQAGKVIWGKYAQVTNNPENDGCINAVLL
Nectonema_munidae              KTSKEDTRKQNIMAVSAISNIVKTSLGPNGLDKMLVDDIGDVTVTNDGATILKMLEVEHPAAKILCELADLQDKEVGDGTTSVVILAAELLKNSQDLSKWKVHPTVIISGYRLACKEACKYIQEHLSIDTEELNRENLTKCAKTSLSSKLIGSNIDFFSKMVVEAALSVSKTQSGTKCLIKNVKVLKSHGGCMTDSVFLNGFALNCNIASQAMPTYIKEAKIACIDFSLNKAKMSLGCQIVVNDPSALTSIREREVMIVKERIAKIITAGANVVLTTGGIDDLCLKPFVEANVMAVRRCTKADLIKISKITGAVLISSLGNLDGGESFESSFLGNAQEVKVEKTGDTEWISVC-MAASIILRGPNDVLLDEAERSLHDALCVVKRVIESRKVVPGGGAVETALNIHLENFATSIASREQLAVAAFAKTILVIPKILAENAALDSMELVSKLRSLHNQSQTHESYKWFGLNLKEATLVDNKENGVLEPMMSKIKCLKFATEVAITILRIDDMIALKNKPDQVRESNISCAKGIADAIRTSLGPKGMDKMIKDKKGDVTITNDGATILKQIEASQPAAKMMVELSKAQDVEAGDGTTSVVILAGSLLSAVSTLLSKGIHPSIIASHFQKASNSAVKVLISKPVDLKDREALIKISSTALNSKVVSAYSNLLAPMAVDAVMKNVNLENVKVIGKLGGTLEDSCLIEGIIFDQKGPKKIEKAKIAMIQFCISPPKTDMESNIIIQDYAQMDRVLKEERTYILNIVKQIKKVGCNVLLIQKSILRDAVSDLAMHYFAKMKIMVINDIERDDVDFVCTSLGCKPIASLDHFQAGMLGGAELVEENTGKILKITGVMNPAVSVLLRGSNKLIISEAERSFHDALCVIRCLVKKPALISGGGAPEIELSLRLNQLSQNLGNVESHCFKAFADAMEVIPYTLSENCGLNSLLTVTSLKKKHVCGECHAGISVRKGLINNTLDESIMQPLIVLSGALKLATEVVVNILKIDDIFDEYGRPMIVYNNQN-KKRLTGLEAYKSHILAGKSLADVIKTSLGPRGLDKMLVSPDGDVSISNDGATILKNMDVEHHIAKLMVDLSQSQDDEIGDGTTTVVVLAGALLAKAEHLLDRGIHPSRIAEGYEKAADYVVNQLSGICERFEEENISERLIQVAMTSLSSKIVNKCARKMAEIAVDAVFAVADFERKDVNFELIKVDGKVGGKLEDAILVKGVLIDKDFSHPQMPKEVKNAKIAILTCPFEPPKPKTKHKLEVENVKDFKELREYEWRKFEEMIQLVKASGANLVMCQWGFDDEANHLLYHNQLPAVRWVGGPEIELLAIATGARIIPRFSEITAKKLGTAGIVRELTFGTSKDHMLVVEECKNSKAVTIFVRGGTKVIIDEAKRSIHDALCVVRNLIRDSRIVYGGGSSEIHCSIALNQLAEKSSGVESYVLEAFSQALLAIPEALAENSGLSSIEAVSNCVAEQVQTKNPRLGIDCMGIGNEDMKAQNVIETYIGKKQQILLVAQMVRMILKIDDIRSKDITFGTNARIEMLKGVDLLANAVSVTLGPKGRNVIIEQSFGSPKITKDGVTVAKAVELKDKLQNIGAKLVQDVSNNTNEKAGDGTTTATILARCIAKEGFDKISRGANPIETRKGVMLAVEKTVDHLKTLSRPVETPEEICQVATISANGDGLIISNAMERVGRNGVITVKDGKTLKDDLDVIEGLKFDRGFVSPYFINTPKGGKCEFQDSLVLFSEKKISTIQHLVPALELANRKPLLIIAEDIEGEALTALVLNRLKIGLQICAVKAPGFGDNRKNQLADMAVATGGILFGDDSTTIKLEDITLADFGRVEEVVVTKDDCLLLRGKGSKEDVNKRIEVIKDEIDNTTSEYEKEKYMERLAKLSNGVAVIKIGGSSEVEVNEKKDRVTDALNATRAAVEEGIVPGGGVALLRSLQKIEELKGENSDQDSGIEIIKKALRQPLFQIALNAGVDAAVIVEKVGYNAQTNEFVDMIKSGIIDPTKVVRTALMDASGVASLLTTAECVITEIPKYHFRSICVVPTAKDFIDVTLSKTQRKTPTVCHRSFKLSRIRSFYMRKVRFTQQTYRDKLALIISEFPKVDDLHPFYTDLLNVLYDKDHFKLALGQLNTAKSLIDNLGKEYGRLLKFGDSQYRCKQLKIAALGRMTKIIKQQKSSLEYLEEVRQHLSRLPSIEPYERTILICGLPNVGKSSFLNKITRADVEVQPYAFTTKSLYVGHTDYKFLRWQVIDTPGILDRPLEERNTVEMQAITALAHINAVVLFFIDVSEQCGYSIQSQVALFESIRPLFTNKPLLVVANKVDVKSLDELTETGISHVKTEACDMLLAHRIENKMKTHKRLNVSVPPNFEKLRPAYIPKLERELEIELGDDYILDLKKHYEKFDSIPELINGKNIADFLDPKEHINIIFIGHVDAGKSTIGGQIMYLTGMIDKRTLEKYEREAKEKNRESWYLSWALDINQEERDKGKTVEVGRAYFETENKHFTILDAPGHKSFVPNMIGGAVQADIAVLVISARKGEFETGFDRGGQTREHAMLAKTVGVKHMIVLINKMDDSTVNWNQCRFSECQEKLLPYLKKVGFNPKTDLTFIPCSGLTGAFLCSWYKGDSLIEFLIMPRVNRDFNLPLRIPILDGYKDMGTVMLGKVEAGAIFKNQTFLLMPNKQTVEILQLYSDDIEVTQATCGENIKAKLKGAEEEDVCPGFVMCDLNFPCSTAKVFDAQVKIIDLNSIICAGYSAILHVHTQVEEVKIRTLICLVDKKTNEKTQLHPRFIKQDQVAIVRFEICIETYKTFQKMGRITLRSEEIRILMDKKTNIRNMSVIAHVDHGKSTLTDSLVSKAGIIAGAKAGETRFTDTRKDEQERCITIKSTAVSMYFELAEKDEKYVGFLINLIDSPGHVDFSSEVTAALRVTDGALVVVDAVSGVCVQTETVLRQAIAERIKPILFLNKMDRALLELQLDKESLYQTFQRIVESINVIIATYGEGPMGNIMIDPTKHNCGFGSGLHGWGFTLKQFAELYTLKYGKKMLKKLWGDKFYNPDDQKWRGFNFFILDPIYKFDAIINKKEEYMKLVEKLLKTQLQDEEGKKLLKSVMRTFLPAGETLLQMITIHLPSPVTSQKYRAAMLYEGPLDDEAAIECNPKAPLMMYISKMVPTSDKGRFYAFGRVFSGCAATGQKVRIMGPNYIQGKKEDLFEKSIQRTILMMGRYVESIEDVPCGNICGLVGVDQYLIKTGTISTCKDAHNMRVMKFAVSPVVRVAVEAKNPADLPKLVEGLKRLAKSDPMVQCQIEESGEHIIAGAGELHLEICLKDLEEDHACIPIKKSDPVVSYRETVSDESNQMCLSKSPNKHNRLFIKARPLPEGLAEDIDKGITPRQEFKARARYISEKYEFDVNDARKIWCFGPEATGPNLLVDCTKGIQYLNEIKDSVVAGFQWATKEGVICEENLRGVRFDIHDANLHADAIHRGGGQIIPTARRVLYASCLTAKPALLEPVYLVEIQCPEIAVGGIYGVLNRRRGVVFEEGNVPGTPMFLVKAHLPVNESFGFTADLRSATSGQAFPQCVFDHWQVLPGDVKPYTIVVNKRKRKGLKENIPDLTNYIDKLESCASSTYPMQCSALRKNGFVVIKNRPCKIVEMSTSKTGKHGHAKVHMVGIDIFTNKKYEDLCPSTHNMLVPAVDRKEYQLTNITDDDFLELMEVGVIKADLKLPEG-----DNDESIL-XXXXXXXXXXXXXXXXXXXXXXXXXXXXXXXXXXXXXXXXXXXXXXXXXXXXXXXXXXXXXXXXXXXXXXXXXXXXXXXXXXXXXXXXXXXXXXXXXXXXXXXXXXXXXXXXXXXXXXXXXXXXXXXXXXXXXXXXXXXXXXXXXXXXXXXXXXXXXXXXXXXXXXXXXXXXXXXXXXXXXXXXXXXXXXXXXXXXXXXXXXXXXXXXXXXXXXXXXXXXXXXXXXXXXXXXXXXXXXXXXXXXXXXXXXXXXXXXXXXXXXXXXXXXXXXXXXXXXXXXXXXXXXXXXXXXXXXXXXXXXXXXXXXXXXXXXXXXXXFDKLNLNRDLLKGIYAYGFEKPSAIQQRAIRPIVQGNDVIAQAQSGTGKTATFSIAILQSISIDLREVQALVLCPTRELALQIQKVILALGDRMNVQCHACIGGTNLGEDIRKLDHVVSGTPGRVFDMVQRKSLRTRNIKLLILDEADEMLRKGFKEQIYDVYRFLQVVLVSATLPHDILLMTHKFMTEPVRILVKRDELTLEGIKQFFVAVDREDWKFDTLCDLYDTLTITQAVIFCNTKRKVIWLAEKMKEANFTVSALHSDLSQKERTAVITSFRAGESRVLISTDVLSRGIDVQQVSLVINYDLPNSRELYIHRIGRSGRFGRKGVAINFANKEDISILRDIEQYYSTQIDEMPMNIPDLIFEGSNEIGVFSKLTNSYCLVGIGDCENYYSILEQEYADIIPVIHTSISDCRIIGRLCVANRFGCLVPNCTTDSELQHIRNSLPDAVKIQRVEERLSALGNTIACNDYVAIAHPDLDRETEEIINDVLQVEVLRYTIANNPLVGTYCSFNNLGCLVDPKTPLKEQVELSSLLQIPIVAGTVNRGSSVISSGLILNDWSLICGLDTTTTEISVMESIFKINIAPSIYGCQNIKKALACMLFSGSRKTLPDGLTRRGDINILMLGDPGTAKSQLLKFVENVSPIGVYTSGKGSSAAGLTAAVIRDPSSRNFIMEGGAMVLADGGIVCIDEFDKMREDDRVAIHEAMEQQTISIAKAGITTTLNSRCGVLAAANSVFGRWDDTKGDSNIDFMPTILSRFDMIFIIKDEH-------------------------------------------------------------------------------------------------------------------------------------------------------------------LQKAIDLVNRATEEDKEKNYEEALRLYKHAVEYFLHVIKYESHNDKSKETLRSKCNEYLDRAERLKKKFISQLEGAILVEKPNVKWDDVIGLNQAKEALKEAVILPIKFPHLFTGKRKPWHGILLYGPPGTGKSFLAKAIASEANNSTFFSVSSSDLVSKWLGESEKLIKTLFDLARQEKPSIVFIDEVDSLCSSRSDNESETNRRIKTQFLTQLDGVGNEMDGVLVLGATNTPWQLDSAIRRRFEKRIYIPLPDSNARSQIFRLNMGMRSVILGKMTEGYSGSDISQVVRDAIMQPVRKVQSATHFKKVRGPSRKNSKVMVDNLLTPCSPGDSGAVLLSFQDIQSDLLLEPPVTMIDMLESLSTQKPTVTSTDLQRLQEFTSDFGIEGXXXXXXXXXXXXXXXXXXXXXXXXXXXXXXXXXXXXXXXXXXXXXXXXXXXXXXXXXXXXXXXXXXXXXXXXXXXXXXXXXXXXXXXXXXXXXXXXXXXXXXXXXXXXXXXXXXXXXXXXXXXXXXXXXXXXXXXXXXXXXXXXXXXXXXXXXXXXXXXXXX--TPTNQIRLTNVAVVKLKKAGKRFEVACYKNKVISWRSKIEKDIDEVLQTAIIFSNVSKGQVAKKEDIIKAFTNNQLEICKEILEKGELQISDKERRAHLDSATKDIATIISNMCINPQTNKPYTVSMIEKSMKSIHFSVKPNKSNKQQALEVIKSLKMFLNRSEYDRGVNTFSPEGRLFQIEYAIEAIKFGTTVIGMKTKNGIVLAAEKRISSKLIEPESVQKITKIDSHIVLAMSGVISDSKLLVDKAIVEAQNYKFVYNEQIGLEALSNALSASAIRFGDDDAEFMSRPYGVALLFAKNGLSLIYMDPSGTYSYYDAKAIGSGSEGAQQTLTEIYDTEMPTDAVIIEILKILKLVMEDSPNKSNIEXXXXXXXXXXXXXXXXXXXXXXXXXXXXXXXXXXXXXXXXXXXXXXXXXXXXXXXXXXXXXXXXXXXXXXXXXXXXXXXXXXXXXXXXXXXXXXXXXXXXXXXXXXXXXXXXXXXXXXXXXXXXXXXXXXXXXXXXXXXXXXXXXXXXXXXXXXXXXXXXXXXXXXXXXXXXXXXXXXXXXXXXXXXXXXXXXXXXXXXXXXXXXXXXKYDSRTTIFSPEGRLYQVEYAMEAIGQAGTCLGIKSNEGIILAAEHRNLSPLLDESTQTEKIYRISGSMAACVAGITADANVLIKQLRLTAESYKLQWGESMPCEQMVAQVCDLKHAYTQYGGKRPFGVSLLYAGWDKHFGYQLYCSDPSGNYEGWSGVAIGSNHTAAMSILEENYDEKGCTWEEALKLVVKILLKTFEVSQLSVEKIEMATL--YSFSLTTFSPSGKLVQIEYALAAIESGTSSIGIKAKNGVVLASEKKFPSSLYDASSVKKVEKVNENCGLTYSGLSPDFRLILRNGRTLALNYSKFYGEDPRPVLLVQKIASLMQEYTQSGGVRPFGVSVLLAGWIPELYQADPSGSYFSWKATAIGRNYTNARSFLEKRYNEDVELEDAVHTAILTLKENFEGSINENNIEIGVCGFKRLKHQEIHDXXXXXXXXXXXXXXXXXXXXXXXXXXXXXXXXXXXXXXXXXXXXXXXXXXXXXXXXXXXXXXXXXXXXXXXXXXXXXXXXXXXXXXXXXXXXXXXXXXXXXXXXXXXXXXXXXXXXXXXXXXXXXXXXXXXXXXXXXXXXXXXXXXXXXXXXXXXXXXXXXXXXXXXXXXXXXXXXXXXXXXXXXXXXXXXXXXXXXXXXXXXXXXXXXXXXXXXXXXXXXXXXXXXXXXXXXXXXXXXXXXXXXXXXXXXXXXXXXXXXXXXXXXXXXXXXXXXXXXXXXXXXXXSKISRDSINEAISLVLSNSKKRKFRETIELQISLKNYDPQKDKRFSGTVRLKCCPKKNFSICVIGDELHCDEAAKSNIPTMDLEALKKLNKNKKLVKKLAKKYDAFLASDSVIKQIPRILGPGLNKAGKFPTIVTHSDSIKCEEVKATIKLQMKKVLCLAVAVANVDMAQEEILSNLNLTINFLVSLLKKGWQNVRGLYIKSTMGPAIRLYMGPKPDPTAISIVCLRAVGGEVGATSALAPKVGPLGLSPKKIGDDIAKATQDWKGLKITVKLTIQNRQATVEVIPSAASLIIKALKEPPRDRKKVKNIKHSGNLTLDEIIEIAKKMRRSMAKELVGTVKEVLGTAQSVGCTINGCNPHSIIDKIENSEIEIPMGAYQYINQLWRKKQSDTMAYLLRLRCWEYRQRNVIHRVPRSSRPEKARRMGYRAKQGYVIYRVRVRRGNRKKQVAHGNTSGKPKNAGVNEQKRAKSLQAIAEQKVGKKLGELRVLNSYWVAQDSTYKFYEVILIDPMHKAIRRNPDTQWITRPIHKHRELRGLTSSTKKSRGLGKGHKYHLTIGGSKKAAWKRRNTLSLKRYR---YSYEPEASSKSAKARAFNVRVHFKNTRETAQAIKHMHIRRAVRYLKNVIAKKEIVPFRRFNGGVGRKAQCKAFKTQGRWPEKSAKFLLDLLKNAESNAQFNNLDTDHLVIQHIQVNRATKIRRRTYRAHGRITPYMSSPCHVEIVL----XXXXXXXXXXXXXXXXXXXXXXXXXXXXXXXXXXXXXXXXXXXXXXXXXXXXXXXXXXXXXXXXXXXXXXXXXXXXXXXXXXXXXXXXXXXXXXXXXXXXXXXXXXXXXXRKIRTSVHFRRPRTLQLKKRPTYPRRSIPKKCKMDQYSIVKYPLTSEACMKKTEDNNTLVFIVDKRANKHQIRASIQKLYSVKIKKLNTLIRPDGKKKAYVCLSSEHDALDVANKIGCISHRKFSAPRHGHKGFLPKKRSKRHRGKCKSFPKDDSTKPVHLTAFMAFKAGMTHIVRDVNKPGSKLNKKEVVEPVTILETPPIMVVGIVGYIETPKGLKSLKTIWAEHLSEDCKRRFYKNYRSKKKAFSKYTMKWQDESGKKQIEHDLDVMKKYCKVIRAICHTRMNLLKKGQKKAHLMEIQVNGGSISDKIDWVRNHFEKSVSVSSVFSKDEMIDCIGVTKGHGFKGVTSRWHTKKLPRKTHRGLRKVACIGAWHPSRVRFTVARAGQKGYHHRTEINKKIYRIGLC--LPDNASTSYDLTKKNITPLGGFPHYGIVSNDYLMIKGACVGPKKRVITLRKSLLVQTSRTSQEEINLKFIDTSSKFGHGRFQTYEEKXXXXXXXXXXXXXXXXXXXXXXXXXXXXXXXXXXXXXXXXXXXXXXXXXXXXXXXXXXXXXXXXXXXXXXXXXXXXXXXXXXXXXXXXXXXXXXXXXXXXXXXXXXXXXX----------RHHSDRYLRIKKSWRKPKGIDNAMRRRFKGQPRMPKIGYGNVKKTRHMLSDGFFKVLVHNTRELEVLMMQSHKFCAEIAHNVSSRKRKEIVERANQLAIKVTNPNARLRSQET-KGYKVTRPSRRR-KKIQFVKDLVREVTGFAPYEKRAIELLKVSRDKRALKFLKKRVGTHKRGKRKREEMNKIVQ----MTKGTSSFGKKHIKSHTLCRRCGKKSYHNQKKRCSSCGFPDKKMRKYNWSEKAKRRRTQGTGRMKYLKKVRIHFRSGLLNGXXXXXXXXXXXXXXXXXXXXXXXXXXXXXXXXXXXXXXXXXXXXXXXXXXXDKATRKANYFLKIHKLFDEYPKCFIVNIDNVGSKQMQSIRYSLRGSAELLMGKNTLIKRALRGYLEKNPSIEKLLPFLKGNVGFVFTDEDLLEIRNRIDQNKKEAPAKAGAIAPVDVIVPAQNSGLGPEKTSFFQALSIPTKISRGTIEILSDVHLIKIGDKVGASEAALLNMLKISPFSYGLSIRKVYDSGSVLNPAILDIKESDLINNIRNGINNIAALSLAINYPTVASVPHMIVNGFNNLVALALASDFKQAEKMIEMIKNPSLFVDPFTKKEWYDVKAPSMFPKRQIGKTLVTRSQGTKLSSDNLKGRVFEVNLADLHNEQYTYKKIKLICEDIQGKNLLTNFHGLDMTRDKLCFIVKKWQTMIEAHVDAKTTDGYTLRLFAIGFTRRQVKKTSYAQKEQVKNIRRKMVEIMVNEVVNSDLKSLVEKLIPDTIGDSILKSTNRIYPLHEVHVRKVKVLSKPKLDLGKLMELHTTDGYEPPIQESVXXXXXXXXXXXXXXXXXXXXXXXXXXXXXXXXXXXXXXXXXXXXXXXXXXXXXXXXXXXXXXXXXXXXXXXXXXXXXXXXXXXXXXXXEKAFQKQDISRINLKKDQRYYKNIGLGFKTPKEAMEGTYIDKKCPFTSGVLIRGRILTGKIQKMKMQRTIVIRREYLHYVKKYNRFEKKHKNMSVHLSPCFRDAAVGDTVTVGECRPLSKTVRFNVIKLTK-KIRITLTSQNVKAVEKVCSDLISRARNKNLTVKGPVRMPTKNLSITTRKTPCGEGSKTWDRFFLRIHKRLIDLYSPTQSVQQITSLPIESGVDVEVT---TIRTRKFMTNRLLCRKQMVVDIVHPGIATLSKKEVREKLAKMYKTTIDCVFCFGFKTKFGGGKTVGFSLIYDTLDIAKKTEPKYRLARN-----------------------TRDKLNNLALFDVATYAKFKKEVVSYKLITPSIVSERLKIRGSLAKKGLRELAANGLIRPVVLHSAQIVYTR--RGPRRHLKRLNAPKHWMLAKLSGVFAPRPSCGPHKLRECLPLIIFLRNRLKYALTASEVTKIVKKRLIKIDGKVRTDPKFPAGFMDVINIEKTRENFRLLYDPKGRFAVHRINPQEAKFKLCRVKKVRIGVKGIPFLVTHDGRTIRYPHPHVKANDTVKVDIATGKIIDFVKFDTGNLCMITGGHNVGRVGIITHREKHPGSFDIVHVKDKASHSFATRLSNVFIIGKGDHSLVTLLKDKGLRLTVAEERDKRMKLNISFPATGRSKLIELDDDRKERIFYEKRMAQEVEADSLGPEWKGYILRINGGNDKQGFPMMQGVLTSGRVRLLLNKKHKCFRPRRKGQRKRKSIRGCIVDSNLSVLSCSIVKKGLNEIPGITDSELPRRLGPKRATKIRKLYNLKKEDDVRQYVIRRLLPMKEGQKYKSPKIQRLVTPQRLRRKRXXXXXXXXXXXXXXXXXXXXXXXXXXXXXXXXXXXXXXXXXXXXXXXXXXXXXXXXXXXXXXXXXXXXXXXXXXXXXXXXXXXXXXXXXXXXXXXXXXXXXXXXXXXXXXXXXXXXXXXXXXXXXXXXXXXXXXXXXXXXXXXXXXXXXXXXXXXXXXXXXXXMGISRDSWHKRRATGGKRKPIRKKRKFELGRPAANTKLGPKRIHTVRTRGGNKKYRALRLEMGNFSWTSKRRTHKTRIIDVVYNATSNELVRTQTLVKNCIVLVDATPFKLFYENYFCIPLVKKKVKEKEISEKKKKLIETRKPFSDVEQSLKDQFSTGRLMACVSSRPGQTGRVDGYILEGKELDFYL-------LCFKAREIFISESNIQQVDTPVTICGDIHGQFYDVMQLFKAGGDIPKTNYLFMGDFVDRGFYSVETFLLLLALKVRYPDRITLIRGNHESRQITQVYGFYDECFRKYGCVTVWRYCTEIFDYISLGAIIDGEIFCVHGGLSPSIQTLDQIRLIDRKQEVPHDGPMCDLLWSDPDVATWTVSPRGAGFLFGNKIVEQFNHDNSLRLICRAHQLVMEGFKWHFDKNVLTVWSAPNYCYRCGNVAXXXXXXXXXXXXXXXXXXXXXXXXXXXXXXXXXXXXXXXXXXXXXXXXXXXXXXXXXXXXXXXXXXXXXXXXXXXXXXXXXXXXXXXXXXXXXXXXXXXXXXXXXXXXXXXXXXXXXXXXXXXXXXXXXXXXXXXXXXXXXXXXXXXXXXXXXXXXXXXXXXXXXXXXXXXXXXXXXXXXXXXXXXXXXXXXXXXXXXXXXXXXXXXXXXXXXXXXXXXXXXXXXXXXXXXXXXXXXXXXXXXXXXXXXXXXXXXXXXXXXXXXXXXXXXXXXXXXXXXXXXXXXXXXXXXXXXXXXXXXXXXXXXXXXXXXXXXXXXXXXXXXXXXXXXXXXXXXXXXXXXXXXXXXXXXXXXXXXXXXXXXXXXXXXXXXXXXXXXXXXXXXXXXXXXXXXXXXXXXXXXXXXXXXXXXXXXXXXXXXXXXXXXXXXXXXXXXXXXXXXXXXXXXXXXXXXXXXXXXXXXXXXXXXXXXXXXXXXXXXXXXXXXXXXXXXXXXXXXXXXXXXXXXXXXXXXXXXXXXXXXXXXXXXXXXXXXXXXXXXXXXXXXXXXXXXXXXXXXXX-----EKGAKIFKQRCAQCHTTNQGGTHLTGPNLFGVFGRQTGQAPNYNYTDANKEKGIVWSDETLNIYLTNPKKYIPGTKMVFAGLKKDTDRADLIAFIKT--XXXXXXXXXXXXXXXXXXXXXXXXXXXXXXXXXXXXXXXXXXXXXXXXXXXXXXXXXXXXXXXXXXXXXXXXX-----------VIHIRIQQRNGRKTLTTVQGLNKKFDKKKIIRACKKEFACNGTVVEHPEFGEILQFQGDQRNKINEFLTKLQIASQSQIKVHGF---------------------------------ISLQAMDGSHVSLVSMLLKFDGFDKYRCDKNLSMGINLTSLSKILKCSGADDIITLKASDDVLNLTFESPKQDRTSDYQLKLMNLDVEQLGIPETDYSAIVTMSAAEFSKICRDLAQISESVTINVVKGEVHFIAAGDLGNGCVKLTPNEAVDSEENACTIELVDPVKLNFALRYLNYFTKASVLSHKVILSLSKDVPLVVQYEMEDLGYIKYYLAPKIGKVFGISGPVVIAEHMSGAAMYELVRVGHQQLVGEIIRLENDRATIQVYEETSGVAVGDPVLSTGKPLSVELGPGILNNIFDGIQRPLQFIHDTTGSIFLPRGVNVSALDRKVQWEFKLGSLLTAGDIFGSVPESTFVNHKIMLPPKCHGRVTYIAPQGNYHIDDVVMEVDFEGDKFSCCMLSSWPVRQSRPVSEKLTSCFPLLTGQRVLDSLFPTVQGGTTAIPGAFGCGKTVISQSLSKYSNSDVIIYVGCGERGNEMSEVLRDFPELKVNINGKEESIMKRTSLIANTSNMPVAAREASIYTGITISEYFRDMGYNVSMMADSTSRWAEALREISGRLAEMPADSGYPAYLGTSLASFYERAGRVTCLGNPERNGSISIVGAVSPPGGDFSDPVTSATLGIVQVFWGLDKKLAQRKHFPSINWLISYSKYLRTLDTYYEKHFPEFVSLRTKAKEILQEEEDLAEIVQLVGKASLAELDKVTLEVAKILKDDFLQQNSYSVYDKFCPFYKTVAMLSNIIAFYDCSRRAINSTSNSNKITWSVIKESCSDIIYELSNMKFKNPDTEGEQKIREDLGKLNENIQQSLRSLEDFPSRMNMKVLKVRLTSLNKGHDLLKKKSEALSFRFRQVLTKIINIKIELGDTMKEASFSLSEGKFTMGDFNHDVLQSVKKAQIKVKCKKDNVAGVSLPSFECVQEGDCYELTGLARGGQQLNKIKKSYSMAIRLLVDLASLQTSFIALDENIKLTNRRVNALEYVLIPRIENTIKDMISKLDEMEREEFYRL------MPQNEYIDLAIKRHGRRLDYHEKRRKKEAREGNVLANKAKKLRGIRAKLFNKTRFKEKIQMKKTIRAHEEKNSKAIPAYLLDREQNSSKVLSNMIKQKRKEKAGKWNVPLPKVRAVSEREVFKEVKTGKSRRKSWKRMILKPSFVGDGFTRKPPKYERFIRPMALRYKKAHVTHPELKATFHLSILGVKKNPSSSFYTTLGVLTKGTIIEVNVSELGLVTPGGKVVWGKYAQITNVPENDGCINAVLL
Peripatus_sp                   RTSGAPIRTQNVMASCAIANIVKSSLGPVGLDKMLVDDIGDVTITNDGATILKLLEVEHPAAKVLVELADLQDQEVGDGTTSVVIIAAELLKNADELVKCKIHPTSIISGYRLACKEACKYIQENLAISTDELGRDCIINVANTSISSKLIGSDSDFFANMVVEAAMAVKDGKGGSTYPIKAVNVLKAHGQSMRESMLINGYALNSTVASQGMVKKVTNAKIACLDFSLQKIKMHLGVSVVIEDPEKLEGIRQRETDITKERVGKILSTGANVVFTTGGIDDLCLKYFVEAGAMGVRRCKKADLRRIAKATGATFLLTMANLEGDESFEASYLGQADEVIQEKICDDELILIKHSAASIILRGASDFFVDEMERSIHDALCVVKRVLESKSVVAGGGAVEAALSIYLENFATSLGSREQLAIAEYAKSLLVIPKTLSVNAAQDSTDLVAKLRAYHNSSQTHSQLKWVGLDLHAGVVRDNLKAGVLEPAMSKVKCLKFATEAAITILRIDDMIKLKDKPAQIRNSNITAAKAVADSIRTSLGPRGMDKMIRAANGDVTITNDGATILKQIKVMHPAAKMLVELSKAQDVDAGDGTTSVVVIAGSLLDGAAKLLSKGIHPTTISEGFQKAAAKAVEILMGVKVDLADRESLLKSASTALNSKVVSQNSSQLAPIAVDAVLKNVDLKDIHIIQKLGGTIEDTELIEGMVFTQKGPTKVEKAKIALIQFCISPPKTDMDNQVVITDYTQMDHILREERTYILNIVKQIKKSGCNVLLIQKSILRDAINDLALHFLAKMKIMVIKDIEREDIEFICKTLGCRPIASLDHFVVESLASAELVEEGTSKIVKVTGIANPTVSVLIRGSNKLVLEEAERSLHDALCVIRCLVKKRYLIAGGGAPEIELALRLSEYSHYLTGMEAYCFRTFADALEIIPSTLAENAGLNPIATVTELRNRHAQGEKTAGINVRKGGITNILEENVVQPLLVSTSAIQLAAETVRSILKIDDIFDEYGRPFIIIKDQDKRSRATGVEALKSHILAARSVANTLKTSLGPKGLDKLMVSSDGDLTITNDGATIMNMMDVEHQIAKLLVELAKSQDDEIGDGTTGVVVLAGALLEEAELLLDRGIHPIRIADGYELAARHAIEHLDKISDSYPVDTNNEPLIQTAMTTLGSKIVNRCHRQMAEIAVNAILCVADMERRDVDFELIKVEAKVGGKLEDTMLVKGVIVDKDFSHPQMPKIVKNAKMAILTCPFEPPKPKTKHKLDVTSVEDYKKLKEYETEKFEEMVQMVKDTGANLVICQWGFDDEANHLLLQRNLPAVRWVGGPEIELIAIATGGRIVPRFSELTAEKLGTAGLVRELTFGTTKDRMLVIEECKNSRAVTIFIRGGNKTIVEEAKRSLHDALCVVRNLIKDNRIVYGGGAAEISCALAVSQQAEKIKTLEQYAFRAFADALESIPLALAENSGQAPIQTLTEVKARQIKENNTRLGIDCLSVGTNDMKEQHVIETLIGKKQQISLATQVVKMVLKIDDVLAKDIKFGPDARAAMLQGVDILADAVAITMGPKGRNVIIEQSWGSPKITKDGVTVAKGIELKDKYQNIGAKLVQDVANNTNEEAGDGTTAATILARSIAKEGFEKIIKGANPIEIRKGVMLAVDTVVEALKKMSKQVTTPEEIAQVATISANGDGELISAAMKKVGRDGVITVKDGKTLQDELEIIEGMKFDRGYISPYFINTAKGAKCEFQDALVLFSEKKISTIQSIVPALELANRKPLIILAEDVDSEALSTLVLNRLKVGLQVCAVKAPGFGDNRKNSLQDMAIATGGVVFGDEANLNKVEDIQKEEFGSVGEVIITKDDTLLLKGKGKKADIDRRVSQIKDEIELTNSEYEKEKLNERLAKLASGVAVLKVGGSSEIEVNEKKDRVNDALNATRAAVEEGIVPGGGLALLRCLPALDTIKPENEDQRIGIEVIRKALRMPCQTISKNAGVDGAIVVEKVGYDALRNEYVDMIGTGIIDPTKVVRTALMDAAGVASLLTTAEVVITESPKYNFKKITVVPCTKDFVDIILSKTQRKTPTVIHKHYKISRIRQFYTRKIKFTQQNYHDKLTQILTDFPKLEEVHPFYADLMNVLYDKDHYKLALGQINTARHLIDNVSKDYVRLMKFGDSLYRCKMLKRAALGRMCTIMKRQNQSLLYLEQVRQHLSRLPSIDPNTRTLLICGFPNVGKSSFINKITRADVEVQPYAFTTKSLFVGHTDYKYLRWQVVDTPGILDHPLEERNTIEMQAITALAHLRAAVLYFLDLSEQCGHGLQEQVELFKNIKPLFERKPLIVVANKMDIIRLDDVTNEGIMAVKEMACDLLLSQRLEIKMRSKRQINVSFPKLRDKPRPACIPKLERDIELELGDDYMLDLKKNYERYDIIPEIWTGHNIADFIDTKEHVNIIFIGHVDAGKSTIGGHIMFLTGMVDKRTLEKYEREARELNRESWYLSWALDTNQEERDKGKTVEVGRAFFETDNKHFTILDAPGHRSFVPNMIGGASQADLAVLVISARKGEFETGFERGGQTREHAMLAKTAGVKHLIVLINKMDDPTVEWSEARYNECREKLIPYLKKCGFNPKSDLYFMPCSGITGAFLCSWFRGPSFINYIDLPLLNRLAD-----------------------------------------------------------------------------------------------------------------------------------------------------------------------------------EIRGLMDKKRNIRNMSVIAHVDHGKSTLTDSLVSKAGIIASAKAGETRFTDTRKDEQERCITIKSTAISMYFEVLEKDLAFIGFLINLIDSPGHVDFSSEVTAALRVTDGALVVVDCVSGVCVQTETVLRQAIAERIVPVLFMNKMDRALLELQLDQEDLFQTFQRIVENINVIIATYSDGPMGDIRVDPSKGNVGLGSGLHGWAFTLKQFAEIYSEKFKIKLMKRLWGENFYNPKAKKWRAFCMFVLDPVYKFDAIMNKKDETAKLLEKLLKGEDKDKDGKALLKIVMRTWLPAGEALLQMIALHLPSPVTAQRYRTDLLYEGPQDDELSKECNPLGHLTMYISKMVPTSDKGRFYAFGRVFSGIVSTGQKVRIMGPNYVPGKREDLFEKAIQRTILMMGRYVEAIEDVPCGNICGLVGVDQFLVKTGTITTFKDAHNLRVMKFSVSPVVRVAVEAKNPSDLPKLVEGLKRLSKSDPMVQCIIEESGEHIIAGAGELHLEICLKDLEEDHAGIPIKISDPVVSYRETVSDESDTMCLSKSPNKHNRLFMRATPMPDGLPEDIDKGVSPKGEFKARARYLGEKYDYDVTEARKIWCFGPDGSGPNILMDCTKGVQYLNEIKDSVVAGFQWATKEGVLCEENMRAVRFNIHDVTLHADAIHRGGGQIIPTTRRCLYACVLTAKPRLMEPIYLVEIQCPEVAVGGIYGVLNRKRGHVFEESQVAGTPMFIVKAYLPVNESFGFTADLRSNTGGQAFPQCVFDHWQILPGDPKPREIVDETRKRKGLKPGIPDLANYLDKLDSGASATYPQQCSALRKNGFVMLKARPCKIVEMSTSKTGKHGHAKVHLVGLDIFSGKKYEDICPSTHNMDVPFVKREDFQLCAIGDDGFLSLMDSGEIREDMKLPEGTVLRACGEEAVIATRTYDLNITYDKYYQTPRLWLYGYDENRKPLTEKEMYEDFSQDHAKKTVTMETHPHLPGPHMASVHPCRHAEVMKKIIQTVAEGGGDLGVHLYLVIFLKFVQAVIPTIEYDYMGRRPARCYRYCKNKPYPKSRFCRGVPDPKIRIFDLGRKKAKVDEFPLCVHLVSDEYEQLSSEALEAGRICANKYLVKFCGKDSFHIRMRLHPFHVIRINKMLSCAGADRLQTGMRGAFGKPQGTVARVHIGQPIMSVRAKENHKAQVIEALRRAKFKYPGRQKIYVSKKWGFTKWDMADFEQMRTEGKLFPDGFYCKYRSGHGPLFDDMALREELLRGIYAYGFEKPSAIQQRAIMPCIKGHDVIAQAQSGTGKTATFSISILQQIEVTLRECQALILAPTRELAQQIQKVVIALGDYMSAQCHACIGGTNVREDMRKLEHVVVGTPGRVYDMINRRSLRTTNIRIFVLDEADEMLSRGFKDQIYDVFTHLQVILLSATMPADVLEVTKRFMREPIRILVKKEELTLEGIKQFYIAVEREEWKLDTLCDLYETLTITQAVIFCNTRRKVDWLTEKMHIRDFTVSAMHGDMEQKERDMIMREFRSGSSRVLITTDLLARGIDVQQVSLVINYDLPTNRENYIHRIGRGGRFGRKGVAINFVTEEDKRTLRDIEQFYNTQIDEMPMDVADLIFENNNEVGVFSKLTNSYCLVAIGGCENFYSVFESELSDTIPVIHTSIAGCRIIGRLTVGNKKGLMVPSSTTDQELQHIRNSLPDSVKIQRIEERLSALGNVIACNDYVALVHPDLDSETQEILADVLNVEVFTHVIAGNSLVGSYCSVSNQGALVHPRTSTIEQDDLSALLQVPVVAGTVNRGSEVIGGGLVVNDWCAFCGADTTVTEINVIQSVFKLSIAPSIYGSIDIKKAITCLLFGGSRKRLPDGLTRRGDINLLLLGDPGTAKSQLLKFVERVSPIAVYTSGKGSSAAGLTASVTRDPVSHNFIMEGGAMVLADGGVVCIDEFDKMREDDRVAIHEAMEQQTISIAKAGITTTLNSRCSVLAAANSVFGRWDDSKGEENIDFMPTILSRFDMIFVVKDEHCGPRLSAEAGEKLKNRYILMRSGSREQERETEKRMNIPITVRQLEAIIRISESLAKMQLNPFATEEQVDEALRLFQVSTLDAAMSGSLAGVEGFTTTEDQEMLTRIEKQLKRRFAIGSQVSEHSIIQDFLKQKYPERAIYKVLHFMIKRGEIQHRLQRKMLYRLQKAIDLVTKATEEDKNKNYEEALKLYEHGVEYFLHAIKYEAQSEKAKETIRAKCIQYLDRAEKLKKKFNTKLEGAIVMEKPNIKWSDIAGLEGAKEALKEAVILPIKFPHLFTGKRTPWKGILLFGPPGTGKSYLAKAVATEASNSTFFSVSSSDLVSKWLGESEKLVKQLFQLGREHKPSIIFIDEIDSLCSSRSDNESESARRIKTEFLVQMQGVGNDVDGILVLGATNIPWVLDAAIRRRFEKRIYIPLPEDHARTQMFKLHMGTAHSLLGKKTEGFSGADISIVVRDALMQPVRKVQTATHFKKIRGPSRTNPNVMIDDLLTPCSPGSPGAIEMSWMDVPSDKLLEPIVSMSDVLRSLATSKPTVNEADLDKLRRFTEDFGQEGRLIPVPRNRYTPLKDNWLKIVTPIVEHLHLQLRFNLKTRNVEIRSSKETDIGALQKGADFVRAFTLGFEVDDALALVRLDDLFLESFEITDVKPLKGDHLSRAIGRIAGHGGKTRYTIENVTKTRIVLADTKIHILGSYQNIKIARAICNLILGSPPSKVYGIFTPTNQIRLTNVAIVRMKKGGTRFEIACYKNKVVSWRNKTEKDIDEVLQTHTVFINVSKGQIAKKEDLVKSFGDNQSEICLQILAKGELQVSEKERHVQLESMFRDIATIVADKCVNPETKRPYPVGIIEKAMKDIHYSIKEKRSTKQQALDVIRQLKMFLTRSEYDRGVNTFSPEGRLFQVEYAIEAIKLGSTAIGIQTAEGIVLAVEKRVTSTLMVATSIEKIVEMDRHIGCAMSGLIADSKTLIDKARVEAQSYWFTFNERMTVEAVTQAVSNLAMQFSDDDPDTMSRPFGVALLFAEKGPQLFHMDPSGTFVQYDAKAIGSGSEGAQQALQEVYHKSMSLSEALKEVLKILKQVMEEKLNATNVEYDSAITVFSPDGHLFQVEYAQEAVKKGSTAVGVRGKDIVVLGVEKKSVAKLQEDRTVRKICLLDDHVVMAFAGLTADARILINRARIECQSHRLTVEDPVTLEYITRYIATLKQRYTQSNGRRPFGISTLIAGFDDDGPHLYQTDPSGTYHEWKADATGRSAKPVREYLEKNYSDELVADDRQTIKLAIKALLEVVQSGGKNIELVVMRYDSRTTIFSPEGRLYQVEYAMEAIGHAGTCLGILATDGVLLVAERRNTNKLLDEVFFSEKIYKLHDDMACSVAGITSDANVLTNELRLIAQRYLLQYAESIPCEQLVSWLCDIKQSYTQFGGKRPFGVSILYIGWDKHYGYQLYQSDPSGNYSGWKATCIGNNSSAAVSILNQEYKVGEMKLKDALALSIKVLNKTLDMTKLTSEKIEIATLTRYSFSLTTFSPSGKLVQIEYALAAVAAGAPSVGIKANNGVVLATEKKHKSVLYDEHSVHKVEQITDHIGIVYSGMGPDYRLLVKQARKLALQYYLTYLDAIPTAQLVQRIATVMQEYTQSGGVRPFGVSLLVAGWKPNLFQCDPSGAYFPWKATAMGKNYVNGKTFLEKRYGE-LELEDAVHTAILTLKESFEGQMTEDNIEIGVCGFRRLKPNEVKDAGFDRHITIFSPEGRLYQVEYAFKAINQGGLTSVALRGKDTAVAVTQKKVPDKLLVPETVTHLFKLTNNIGCVMTGLVADSFSQVQRARYEAANWLYKYGTDITVEMLCKRMADISQVYTQNAEMRPLGCTMILLAYDELGAQIYKTDPAGYFCGYKATSAGVKQTEANSYLEKKIKKKETIQTAITALSTVLSADFKPSEIEVAIISVENPEFRVLTEQEMASKDEIACVYGALILQDDDVAITGEKIATILKAANVDVEPFWPGLFARALEGVNIKSLITNIGSSKISRDTLYETINTVLQHSKKRKFLESVELQVALKNYDPQKDKRFSGTVKLKYIPRPKFKVCVLGDQQHCDEAKANDVSFKDVEELKKLNKNKKLVKKLAKQYDAFLASESLIKQIPRLLGPGLNKAGKFPTLLTHNESMKIDEVKATIKFQMKKVLCLAVAVGHVNLTPDELAVNLSMAINFLVSLLKKNWQNVRSLTVKSTMGPPQRLYMPPKFDPNEIKVVCLRAIGGEVGATASLAPKIGPLGLSPKKVGDDIAKATQDWKGLKITVKLVIQNRQATISVVPSAAALIIKALKEPPRDRKKQKNIKHSGNVTFDEIISIARQMRRSMARHLDGTVKEILGTAQSVGCTVEGCNPHDVIDKLNNGELEVPMGAYKYMQELYRKKQSDVMHFLLRVRCWQYRQLTRIHRAPRPSRPDKARKLGYRAKQGYVIYRVRVRRGTRKKPVPKGCTYGKPKNQGINQLKFKRNLQSVAEERVGRRCKALRVLNSYWVAQDSTFKFFEVILVDPFHKTIRRNPDMQWVTKPVHKHREMRGLTSAGRKSRGLGKGHRFTQTIGGSRKAAWKRRNTIQLHRKRMTRYSMDPENATKSCKARGSNLRVHFKNTRETAQAIKKMHLRRAVRYLKNVVDKKEIVPFRRFNGGVGRKAQCKNWKTQGRWPKKSAEFLLQLLKNAESNAEYKGLDTDHLVIEHIQVNRAPHMRRRTYRAHGRINPYMSSPCHIEVILTEKEMKIDLCSFSGYKIYPGHGKRMVKADGKVCAFLNAKCEAAYRLKRNPRNVNWTVLYRRKHKKGQQEEMTKKRTRRTTKFQRAIVGATLTDILAKRNQKPEVRKAQREQAIRKKIRTSVQFRPPKTLRLPRIPKYPRKSAPNRNRKDQYSLIKHPLTTESAMKKIEDNNTLVFIVSLRANKPEIKAAVKKLYDIDVAKVNTLIRPDGQKKAYVRLAPDYDALDVANKIGIISHRKFSAPRHGSMGFAPKKRCKRHQGKIKAFPKDDPAKPVHLTAFMGYKAGMTHIVREVDKPGSKVNKKEIVEAVTVLETPPMVIVGVVGYIETPRGLRTFNTIFSEHLNEECRRRFYKNYKAKKKAFTKYAKKWQDDQGKRAIEKDFGKIMKYCKVIRVIAHTQIKLLRKRQKKAHIIEIQLNGGDVAAKVKWAREHMEKQIPVSQVFSQDELIDIIGITKGHGYKGVTSRWHTRKLPRKTHKGLRKVACIGAWHPSRVQFTVARAGQKGYHHRTEINKKIYRIGEGKVIKNNASTDYDVTEKTITPMGGFPHYGEVNQDFLMLKGCVMGTRKRVITLRKSLLTHFKRAALEKIQLKFIDTSSKFGHGRFQTHEEKKSTINEVVTREYTIHLHKRIHGIGFKKRAPRAIKEIKKFAEKQMGTPDVRVDTRLNKHVWSKGVRNVPFRIRVRLSRRRNEDEDSIHKLYTLVTFVPVTTFKGLQTINVDIIKKRTKKFIRHQSDRYAKLKTNWRKPKGIDNRVRRRFKGQYLMPNIGYGSAKKTKHMLPNGFKKVLVHNVRELEVLMMQNRHFCAEISHGVSSRKRKDIVERAQQLAIRVTNPNARLRSEENQKGYRVTRHARAKGKHSKFIRDIVREVTGFAPYERRCMELLKVSKDKRALKFLKKRLGAHKRAKRKRDEMQQVLAHMRKMTKGTSSFGKRHNKTHTLCRRCGRSSYHIQKSRCSQCGYPKSRLRHYNWSIKAQRRKTTGTGRMRYLKKVHRRFRNGFREGXXXXXXXXXXXXXXXXXXXXXXXXXXXXXXXXXXXXXXXXXXXXXXXXXXXDRSTWKANYFLKLVELFEEYPKCFIVGVDNVGSKQMQEIRSAMRGHAVILMGKNTMIRKAIRGHLAKNPALEKVLPYIVQNVGFVFTKEDLGEIRTKLVENKRGAPAKAGAIAPCDVRIPAQNTGMGPEKTSFFQALQIPTKIARGTIEILNEVHLIKVGDKVGASEAALLNMLGITPFSYGLVVLQVYDNGTLYSPDVLDMTTEELRKRFLAGVRNVASVSLAIKYPTLASVAHSLATGVQNMLGVAAATDFKAAEQLK---------IDPFTRKDWYDVKAPSMFNIRQIGKTLVNRTQGTKIASEGLKGRVFEVSLADLQNDEVTFRKFRLIAEEVQGRSVLTNFHGMDLTTDKLRSMVKKWQTLIEANVDVKTTDGYLLRLFCIGFTKKQVKKTCYAQHQQVRQIRKKMVEIMQREVSSKDLKEVVNKLIPDSIGKDIEKACQGIYPLYDVFIRKVKVLKKPKFDLGKLLELHGPEGYEPPVLDSVMLMPKKNRTSIYEYLFKEGVLVAKKDFHAPKHVPNLHVIKAMQSLKSRGYVKEQFAWMHFYWYVTNEGIQFLRDYLHLPPEIVPATLKERSFQKQPTVFLNRKKPLRYVRNVGLGFKTPREASEGNYIDKKCPFTGNVSIRGRILTGTVIKMKMQRTIVIRRDYLHYVRKYNRFEKRHRNMSVHLSPAFRDVKQGDVVTIGECRPLSKTVRFNVLKVTKHRIRITLTSRNVKSLEKVCADLIRGAKEKQLHVKGPVRIPTKILRITTRKTPCGEGSKTWDRFQMRIHKRVIDLHSPSEIVKQITSISIEPGVEVEVTIADTLRTRKFMTNRLLCRKQMVVDVIHPGKAMIPKTDVREKLARMYKTTPDVVFCFGFRTAFGGGKSTGFALVYDTLDFAKKFEPKYRLARHGLFERKQRKERKNRQKKVRGTAKVRDKLNNLVLFDKATYDKLNKEVVGYRLITPSVVSERLKIRGSLARAALQELLADGKIKLVVKHHSQVIYTRTTRGPKKHLKRLNAPKHWMLDKLTGVFAPKPSSGPHKMRECLPLNIFLRNRLKYALTGDEAKKIVKQRLVKVDSKVRTDPTYPSGFMDVITIEKIGEHFRLIYDVKGRFAIHRITPEEAKYKLCKVKRVQTGPKGIPFLTTHDARTIRYPDPLIKVNDSVQVIIATGKIIDYIKFDTGNLCMITGGHNLGRVGIVTHRERHPGSFDIVHVKDAMGHEFATRLNNVFIIGKANKPYVSLPRGKGVKLTIAEERDKRMKLNISYPATGCQNLIEVDDEKKLRVFYEKRMATEVAADSLGDEWKGYVVRISGGNDKQGFPMKQGVLTTGRVRLLLSKGHSCYRPRRTGERKRKSVRGCIVDSNLSVLNLVIVKKGEAEIPNITDTTIPRRLGPKRASKIRKLFNLSKEDDVRHYVVRRPLPPKEGKKSKAPKIQRLITPRVLAHKRDEFESSISQALLELEMNSDLKAQLRELHIAAAKEKKAIIIFVPVPQLKAYQKIQTRLVRELEKKFSGKHVVFIAQRRILPKPTRKNRQKRPRSRTLTAVHDAILEDLVYPAEIVGKRIRIRLDGTRLIKVHLDKNQQTNIEHKTETFAAVYKKLTGKEVTFEFMGISRDSWHKRRATGGKRKPWRKKRKFELGRPAANTKIGPRRVHVVRCRGGNKKYRALRLDTGNFSWGSECCTRKTRIIDVVYNASNNELVRTKTLVKNCIVQIDATPFRQWYEGHYALPLGRKKGAKLKRSKKCLKKYKERQKIAKVETALEELFMTGRVYACISSRPGQCGRADGYILEGKELEFYLRKIKAKKLCDKVCDLLLEESNIQPVSTPVTVCGDIHGQFYDLEELFRTGGQVPDTNYIFMGDFVDRGYYSLETFTRLLTLKAKWPDRITLLRGNHESRQITQVYGFYDECQNKYGNANAWRYCCKVFDLLTVAAIIDEQILCVHGGLSPDIKTLDQVRTIERNMEIPHKGAFCDLVWSDPEVDKWAISPRGAGWLFGAKVTHEFMLINNLKLICRAHQLVHEGYKYMFDDKLVTVWSAPNYCYRCGNIAGKLVAVIGDEDTCVGFLLGGIGEFNTARQPNFLVVDKNTSIGELEECFRGFVRRDDIAIILINQNVAEMIRHAIDNHPIPAVLEIPSKDHPYDASKDSILRRARGMFSTDDDSDIRIWVFLPIVVVTFLVGIVRHYVSILISSSKDSQALIRSRLLRENGKYIPKQSFLMRKHFFNSEETGYFKTQNPMTDPTMMTDMLKGNITNVLPMIMIGGWINLTFSGFVTTKVPFPLTLRFKPMLQRGVELNSLDAAWVSSASWYFLNVFGLRSIYTLVLGENNAADQTRAMQEQMSGAALAMPPDPXXXXXXXXXXXXXXXXXXXXXXXXXXXXXXXXXXXXXXXXXXXXXXXXXXXXXXXXXXXXXXXXXXXXXXXXXXXXXXXXXXXXXLVLVLGDLHIPHRCNNLPAKFKKLLVPGKIQHILCTGNLCTRESFDYLKTLASDVHVVRGDFDDNYPEQKVVTVGQFRIGLCHGHQVVPWGDPESLSLIQRQLDVDILISGHTHKFEAYEHENKFYINPGSATGAYNALPSFVLMDIQSSTVVTYVYQLNGEEVKVERIEYKK-MGDIEKGRKLFVQRCAQCHTVETGGKHKTGPNLHGLIGRKTGQSPGFSYTDANKSKGITWDKDTLFIYLENPKKYIPGTKMVFAGLKKDNDRHDLIAYLCSATXXXXXXXXXXXXXXXXXXXXXXXXXXXXXXXXXXXXXXXXXXXXXXXXXXXXXXXXXXXXXXXXXXXXXXXXXDPFADAVKQEGLIHIRIQQRNGRKTLTTVQGISDDYDKKKIVKACKKEFACNGTVVEHPEYGEVIQLQGDQRNNICQFLTKIGIAKPEQLKVHGFFEARLVQGSLLKKVLEAIKDLLNEATWDCSSTGMSLQAMDSSHVSLVSLMLRSDGFDTYRCDRNISMGINLGSMSKILKCASNDDIICIKTGDDTVTFVFEAPNQDKVSDYEMKLMDIDGEHLGIPETDYSVVVKMPAGEFQRICRDLSQIGESVVISCTKEGIKFSASGDLGTGNIKLAQNASADKEEESVTIEMQEAVSLTFALHYLNFFTKATPLSPQVQLSMSNDVPLVVEYKISDMGYIRYYLAPKIXXXXXXXXXXXXXXXXXXXXXXXXXXXXXXXXXXXXXXXXXXXXXXXXXXXXXXXXXXXXXXXXXXXXXXXXXXXXXXXXXXXXXXXXXXXXXXXXXXXXXXXXXXXXXXXXXXXXXXXXXXXXXXXXXXXXXXXXXXXXXXXXXXXXXXXXXXXXXXXXXXXXXXXXXXXXXXXXXXXXXXXXXXXXXXXXXXXXXXXXXXXXXXXXXXXXXXXXXXXXXXXXXXXXXXXXXXXXXXXXXXXXXXXXXXXXXXXXXXXXXXXXXXXXXXXXXXXXXXXXXXXXXXXXXXXXXXXXXXXXXXXXXXXXXXXXXXXXXXXXXXXXXXXXXXXXXXXXXXXXXXXXXXXXXXXXXXXXXXXXXXXXXXXXXXXXXXXXXXXXXXXXXXXXXXXXXXXXXXXXXXXXXXXXXXXXXXXXXXXXXXXXXXXXXXXXXXXXXXXXXXXXXXXXXXXXXXXXXXXXXXXXXXXXXXXXXXXXXXXXXXXXXXXXXXXXXXXXXXXXXXXXXXXXXXXXXXXXXXXXXXXXXXXXXXXXXXXXXXXXXXXXXXXXXXXXXXXXXXXXXXXXXXXXXXXXXXXXXXXXXXXXXXXXXXXXFPSRMAMQLMKSRLKGAQKGHSLLKKKSDALMMRFRQILGKIIQTKILMGEVMKEAAFSLAEAKFTMGDFNQVVLQNVTKAQIKVRSKKDNVAGVNLPVFEHYLDGDSYELAGLARGGQQLSKLKKNYAKAVELLVSLASLQTSFVTLDEVIKITNRRVNAIEHVIIPRIERTLAYITSELDEMEREEFYRLKKIQEKMPQNDYIELHRKRYGYRLDYHERKRKKEAREAHERSDKAKKLRGIRAKLYNKKRHSEKIQMKKTIKMHEERKTKAVPAYLLDREQSRAKILSNMIKQKRKEKAGKWDVPIPKVRGISENEVFKVVHTGKSRRKAWKRMVTKVTFVGEGFTRKPPKFERFIRPMALRFKKAHVTHPELKATFCLPIIGVKKNPSSPLYTSLGVITKGTVIEVNVSELGLVTQGGKVIWGKYAQVTNNPENDGCINAVLL
Neoscona_arabesca              RSTGQPVRTQNVNAACAIANMVKSSLGPIGLDKMLVDNIGDVTCTNDGATILKLLEIEHPAAKVLVELAELQDNEVGDGTTSVVLIAAELLKNADELVKCKIHPTSIISGYRLACKEACKYIQEHLTINTDELGKESIINAAKTSLSSKLIGAESDFFANMVVDAAIAVRDGKGGYLYPIRAVNVLKAHGRSSTESLLINGYALNCTIASQAMPRTVSPAKIACIDFSLQKAKMHLGVQVLITDPEKLDAIRQREADITKERIQKILAAGANVILTTGGIDDLCLKYFVEAGAMAVRRCKKQDLKRIAKATGAQFLPSLANLEGEESFDASMLGEAEEVTQERICDDELILIKRSAASIILRGANDYYVDEMERSIHDSLCVVKRVLESKSVVPGGGAVEAALSIYLENFATSLSSREQLAIAEYAKSLLVIPKTLAVNAAKDASDLVSKLRAYHNSSQTHADLKWVGLDLYEGTVRNNKKAGVLEPAISKIKSLKFATEAAITILRIDDLIKLKEKPRQIRDSNITAAKAVCDAIRTSLGPRGMDKMIQSGNGDVTITNDGATILKQMQVLHPAAKLLVDLSKAQDIEAGDGTTTVVVITGSMLDAANKLLDKGIHPTIISESFQKATEKAVEILMSIPVELSDRESLLKSATTALSSKIVSQHSMLLAPLAVDAVMKNVNLKDIKIMKQLGGTVDDVELIDGLLFKQRGVTKVEKAKIGLIQFCVSPPKTNMDNRIVVSDYTQMDRVLREERAYLLNIVKQVKKAGCNVLLIQKSILRDAITDLALHFFAKMKIMVIRDIEREDIEFVCKTLGCRPIASLDHFVPEALGSAELVQEGGVKYVKVTGVANPTVTLFLRGSNNLVLEEADRSLHDALCVIRCLVKKRALIAGGGAPEIELSLRLAEYSRTLQGMEAYCIRSYADSFEIIPYTLAENAGLNAIATVTELRNKHANGEKNFGINVRKGSVTNILEENVVQPLLVSVSAVTLASETVQTIMKIDDIFDEYGRPFLILKDQDKQTRLTGIDAVKTHIYAGKSVANALRTSLGPKGLDKLLVSPDGDVTVTNDGATILKLMDVDHQIAKLLVELSQSQDDEIGDGTTGVVVLAGALLEHAEQLLDKGIHPIRISDGYELAARCAIEHLDKIAESFPVDKDNEPLIQTAMTTLGSKIVNRCQRQFAEIAVQAILSVADFERKDVDFELIKIEGKEGARLEDSILVKGVIIDKYFSHPQMPKEVKDAKVAILTCPFEPPKPKTKHKLDVTSIESYQELVKYEQDKFVEMVQQVKNTGANLVICQWGFDDEANHLLLKHELPAVRWVGGPEIELIAIATGGRIVPRFQELTAEKLGKAGIVRGLSFGTTEDKMLVIEECQNSRAVTIFIRGGNKMVVDEAKRSLHDALCVVRNLVKDNRIVYGGGSVEMSCSLVVGEQADKIASMEQYAFRAFADALESIPLALAENSGLNPMEEVTAIKARQIKEKNPWLGVDCMLKGTCDMKAQHVIETLTSKKQQISLATQLVRMILKIDDIRAKDIKFGPEVRALMLQGVDVLADAVAVTMGPKGRNVIIEQSWGSPKITKDGVTVAKAIELKDKFQNIGAKLVQDVANNTNEEAGDGTTTATVLARAIAKEGFEKISKGTNPIEFRKGVMMAVEKIIDELKKNSKPVTTPEEIAQVATISANGDGDLISNAMKKVGNDGVITVKDGKTLTDELEVIEGMKFDRGYISPYFINTAKGAKVEYQNALVLFSEKKISSVQSIIPALELANRKPLIIIAEDVDGEALSTMVLNRLKVGLQVAAVKAPGFGDNRKNTLHDMAIATGGIVFGDDADLVKLEDLQPHDLGEVSEVVITKDDTLLLKGSGNKPDIDRRVNQIKDEIEQTTSQYEKEKLQERLARLSNGVALLKVGGSSEVEVNEKKDRVNDALNATRAAVEEGIVAGGGTALLRCLPALDQIKVENEDQRTGVDIVRKSLKMPCTQIALNAGVDAAVVTQKVGYDAMKGEYVNMIEAGIIDPTKVVRTALLDASGVASLLTTAEAVITEIPKYNFKNIVVVPTAKEFTDIVLSKTQRKTPTVVHKQYKITRIRQFYMRKVKFTQQNFHDKLTQILTDFPKLEDIHPFFADISNVLYDRDHYKIALGQLNTARHLIDNVAKEYCRLLKYGDSLYRCKLLKKAALGRMATIMKRQNESLKYLEEVRQHMSRLPSIDPNTRTLLICGFPNVGKSSFINKITRAEVEVQSWAFTTKSLYVGHTDYKYLKWQVIDTPGILDHPIEDRNTIEMLAITALAHLRACVIFVIDPSEQCNYSVEEQI-------------------------------------------------------------------------------------------------------------------------KEHVNVVFIGHVDAGKSTIGGQLLYLTGMVDKRTLEKYEREAKEKNRESWYLSWALDTNQEERDKGKTVEVGRACFETETKHFTLLDAPGHRSFVPNMIGGACQADLAVLVISARKGEFETGFERGGQTREHAMLAKTAGVKHLVILVNKMDDPTVEWSEERYNECKDKLIPYLKKCGFNPKVDVYFMPASGLTGAFLCPWYRGPAFLEYIDLPPLNRPTEGPFRMPVVDKYKDMGTVVLGKVEAGNAKRGQQLLLMPNRKAVEVLQLWSDEDEVVSVMSGENVKIKLKGVEEEEVSSGFVLCDFANPCRTGKVFDAQVVILEHKSIICPGYSAVLHIHAAIEEVSVKALICLIDKKSGEKGKTRPRFVKQDQIAIMRLEICLESFKDFPQMGRFTLRDEEIRGLMNHKRNIRNMSVIAHVDHGKSTLTDSLVSKAGIIAAAKAGEMRFTDTRKDEQERCITIKSTAISLYFELQEKDLVFIGFLINLIDSPGHVDFSSEVTAALRVTDGALVVVDCVSGVCVQTETVLRQAIAERIKPVLMLNKMDLALLTLQLDPEDMYQAFQRSIENVNVIIATYSDGPMGDISVDPSKGNVGFGSGLHGWAYTLKQIAEIYAEKFKIKLMSKLWGENYYNPNTKKWRSFNMFVLDPIYKFDAIMNKKEETAKLLEKLLKGDDKEKDGKNLLKVVMRTWLPAGDALLQMIAIHLPSPVTAQKYRMELLYEGPHDDEAAKTCDPNGPLMMYISKMVPTSDKGRFYAFGRVFSGTVQSGQKVRIMGPNYVPGKKDDLHEKSIQRTVIMMGRYVEPIEDVPCGNICGLVGVDQFLVKTGTISTFKEAHNMRVMKFSVSPVVRVAVEPQHPSDLPKLVEGLKRLAKSDPMVQCIIEESGEHIVAGAGELHLEICLKDLEEDHACIPLKKTDPVVSYRESVQEESSIMCLSKSPNKHNRLYMRACPMPDGLPEDIDKGVNPKDDFKARARYLVDKYEWDATEARKIWCFGPEGTGPNLLVDVTKGVQYLNEIKDSVVAGFQWATKESVLCEENMRGVRFNIYDVTLHADAIHRGGGQIIPTARRCFYAAMLTAEPRLMEPVYLVEIQCPETAVGGIYGVLNRRRGHVFEEAQIAGTPMFVVKAYLPVNESFGFTADLRSNTGGQAFPQCVFDHWQILPGDPRPHQIVMDTRKRKGLKESLPDLDQYLDKLNAGASATYPVQCSSLRKNGFVMLKARPCKIMEMSTSKTGKHGHAKVHLVGLDIFTNKKYEDLCPSTHNIDVPNVNRCDFQLIDISDDGFVTLMDKGETRDDLRLPEGTVLSAVGEEAIV-TRTYDLNITYDKYYQTPRLWLFGYDENRKPLTIEEMYDDISQDHAKKTVTMENHPHLPGPPRASVHPCRHAEVMKKIIHTVTEGGGELGVHMYLIIFLKFMQAVIPTIEYDYMGRRPARCYRYCKNKPYPKSRFCRGVPDPKIRIFDLGRKKAKVDELPLCIHLVSNEFEQISSEALEAGRICANKYLVKMCGKDSFHLRMRLHPFHVIRINKMLSCAGADRLQTGMRGAFGKPQGTVARVDIGQMIMSVRAKDQHKEHVIEALRRAKFKFPGRQKIAVSKKWGFTKWDKEEYEAMRQDGRLKPDGAYCHYYNNHGPFFDNMNLNEDLLRGIYAYGFEKPSAIQQRAIIPCVKGMDVIAQAQSGTGKTATFSIAILQQLNPNNRETQALILAPTRELAQQIQKVVIALGDYMGAQCHACIGGTNVREDIRKLEHVVVGTPGRVYDMINRKALRTEHIRMFVLDEADEMLSRGFKDQIYDVFRMLQVILLSATMPADVLEVTKQFMRDPIRILVKKEELTLEGIKQFYIAVDREEWKLDTLCDLYETLTITQAVIFCNTRRKVDWLTDKMRSKDFTVSALHGDMDQKERDIIMREFRSGSSRVLITTDILARGIDVQQVSLVINYDLPTNRENYIHRIGRGGRFGRKGVAINFITEDDKRSLRDIEQFYNTQIEEMPLNVADLIFENNNEVGVFSKLTNSYCLVAIGGSENFYSVFEGELADTIPVIHTSIAGCRIIGRLCVGNRHGLLVPNGTTDQELQHLRNSLPEDVKIQKVEERLSALGNVIACNDYVALTHPDLDKETEEILADTLKVEIFRQSIANNVLVGSYCALSNQGGLVHPRTSVEDQHELSSLLQVPIVAGSINRGSDVIGAGMVVNDWCAFCGLDTTSTEISVIESIFKLXXXXXXXXXXXXXXXXXXXXXXXXXXXXXXXXXXXXXXXXXXXXXXXXXXXXXXXXXXXXXXXXXXXXXXXXXXXXXXXXXXXXXXXXXXXXXXXXXXXXXXXXXXXXXXXXXXXXXXXXXXXXXXXXXXXXXXXXXXXXXXXXXXXXXXXXXXXXXXXXXXXXXXXXXXXXXXXXXXXXXXXXXXXXXXXXXXXXXXXXXXXXXXXXXXXXXXXXXXXXXXXXXXXXXXXXXXXXXXXXXXXXXXXXXXXXXXXXXXXXXXXXXXXXXXXXXXXXXXXXXXXXXXXXXXXXXXXXXXXXXXXXXXXXXXXXXXXXXXXXXXXXXXXXXXXXXXXXXXXXXXXXXXXXXXLQKAIDLVTKATEEDKKKNYDEAFRLYEHGVEYFLHAIKYEAQSDKAKESIRAKCAQYLERAEKLKKKLLNQLEGAIVIEKPNIQWSDVAGLYGAKEALKEAVILPIKFPHLFTGKRKPWKGILLFGPPGTGKSFLAKAVATEANNSTFFSVSSSNLVSKWLGESEKLVKNLFEMARQQKPSIIFIDEIDSLCSSRSDNESESARRIKTEFLVQMQGVGNDNDGVLVLGATNIPWVLDAAIRRRFEKRIYIPLPDEIARLAIFKFNIGTPHNLLAKKTDGFSGADISVLVRDALMQPVRKVQTATHFKRVSGPSRADPNVIVHDLLTPCSPGCSGAIEMSWVDVPGDKLLEPVITMSDMLLSLSHAKPTVNETDLIKLEEFMKDFGQEG-KVPIPPNRYTPLRENWAKIFSTVVDHLNLHIRFNLKARIVEIRTCKETDISSLQKAADFVRAFALGFEVDDALALVRLDELFLESFDVKDVKTLHGDHLSRAIGRIAGKNGKTKFSIENATKTRIVIADSKIHLMGSYQNIRAARALCNLILGSAPSKVYGIFTPTNQIRLTNVAVVRMKKGGKRFEIACYKNKVMSWRNKVEKDIDEVLQTHVVFTNVSKGQAAKKEDLIKCFGDNQTQICEEILSKGELQISEKERQVLLESTFKDIATIVADKCINPDTKRPYPMSIIEKSMKECHISVKPNKNSKQQALEVIKKLQMFMTRSEYDRGVNTFSPEGRLFQVEYAIEAIKLGSTAIGIQTSEGVVLAVEKRVTSPLMKPVTIEKIVEIDKHIGCAVSGLMADSRTIVDRARVEAQNHWFVYDERMSVESIAQSVSNLAIQFGDNDEDAMSRPFGVAILFAKSDPQLYHMDPSGTYVQYDAKAIGSGSEGAQQALQERYDKRMTLKEALNAALTILKQVMEERLNSSNIEYDRAITVFSPDGHLFQVEYAQEAVKKGSTAVGVCGKSIVVLAVEKKSVAKLQEERTMRKICLLDDHVVMAFAGLTADARILIDRARVECQSHKLTVEDPVTLEYITRHIAMLKQRYTQSNGRRPFGISALIAGFDFDGPHLFQTDPSGVYHEWKANSTGRSAKTVREYLEKNYSEEIIAEDESTIKFAIKALLEVVQ-G-KNL-----RYDSRTTIFSPEGRLYQVEYAMEAIGHAGTCLGILGSDGIVLAAERRNTNKLLDEVFNSEKIYKLHDDMACSVAGITSDANVLTNELRQIAQRYLLQYGESIPCERLVSWLCDVKQAYTQYGGKRPFGVSILYMGWDKHYGFQLYQSDPSGNYGGWKATCIGNNGAAAVSILKQEYKENETTLSDALALAVKVLSKTLDMTKLTADKLEMATLTR------------------------------------NGVVLATEKNYKSVLYEEHSIHKVEMVTDHIGMVYSGMGPDYRLLVRRARKLAQQYQMRYSEPIPTSQLVQRVAYIMQEYTQSGGVRPFGVSLLIAGWRPYLFQCDPSGAYFAWKATAMGKNHVSGKAFLEKRYSEELELEDAIHNAILTLKEGFEGQMTADNIEIGICGFKRL-------AGFDRHITIFSPEGRLYQVEYAFKAINQGGLTSVGLKGKDVAVLVTQKKVPDKLLDPSSVSHIYNITEYIGAVMTGLVADGQSQIYRARYEAANWKYKYGYTIPIDMLCKRVADISQIYTQNAEMRPLGCSMMLIAYDDQGPQLYKADPAGYYCGYRASSVGVKQTEANSYLEKKFKKKEAIQLAISALATVLSADFKPSEIEVGVVSTDQRKFRKLTEAEMLSIDEIACVYSALILQDDDIAITPEKITTILKAAKVEVEPYWPGLFARCCESVDVKQLISNVGSSKVSRDTLYECVNNLLENSKPRNFVETVELQIALKNYDPQKDKRFSGTVKLKHIPRPKFTVCVLGDQQHCDEAKANDVACMDAEALKKLNKNKKLVKKLAKKYDAFLASESLIKQIPRLLGPGLNKAGKFPSLLTHNESMKIDEVKATIKFQMKKVLCLAVAVGHVKMTPDELAQNLNLAINFLVSLLKKNWQNIRSLHVKSTMGPSLRLYMPPKFDPNEIKTVYLRVVGGEVGATSSLAPKVGPLGLSPKKVGDDIAKATADWKGLKITVKLVIQNRNAQIEVVPSAASLIIKALKEPPRDRKKVKHVKHNGNITFDDILTIARTMRRSMAKQLSGTVKEILGTSQSVGCTIDNNHPGDLIRQIDNGELEIPMGAYKYMQELWRKKQSDVMKFLLRTRCWYYRQLNTVHRAPRPTRPDKARRLGYRAKQGYVVYRIRIRRGGRKKQVPKGCTYGKPKNHGVNQLKPVRSHQSIAEERVGRRCKALRVLSSYWVAQDSTYKFYEVILVDPAHNAIRNDPKANWICKAVHKHRELRGLTSAGSKSRGLGKGHKFNKTRS----------------------YSMEPDNATKSCKARGSNLRVHFKNTRETAQAIKKMSLRRAQRFLKNVISKKEIVPFRRFNGGVGRKAQAKQWGTQGRWPKKSAEFLLQLLRNAESNADYKGLDVDRLVVEHIQVNRAPKMRRRTYRAHGRINPYMSSPSHIEVILS---MKIEICSFSGYRMYPGHGKKMVKTDGKSFMFLNGKTEASHMMKRNPRKVTWTVLYRRKHKKGIEEETSKKRTRRTAKFQRAIVGASLSDIMAKRNMKPEVRKAQREQ---RKIRTTVQFRRPRTLTLMRSPKYPRKSCPRRPRFDQWSTIKHPLTTESAMKKIEDNNTLVFIVHKRANKPQIRNAVKKLYNIDVQKVNTLIRPDGQKKAYVKLAPDYDALDVANKIGIISHRKFSAPRHGSMGFVPKKRCKRHRGKVKAFPKDDPSKPVHLTAFIGYKAGMTHIVREVDKPGSKVNKKEVVEPVTILEAPPMIIVGVVGYIETPKGLRAFKTIFAEHLSEDCRRRFYKNYKSKKKAFTKYSKKWSDDVGKKEIEKDLKKMAKYCKVIRVIAHTQMKLMRKRQKKAHIMEIQLNGGSVSQKIKWARDHLEKPVPLSSIFAQDEMIDVIGVTKGKGFKGVTSRWHTKKLPRKTHKGLRKVACIGAWHPSRVQFTVARAGQKGYHHRTEINKKIYRIGQGKVIKNNASTEYDLTEKTITPMGGFPHYGEVNCDYLMLKGCIMGPKKRVITLRKSLLTHTKRAATEKINLKFIDTSSKFGHGRFQTPAEKKSALSEVVTREYTIHLHKRLHGVGFKKRAPRAIKEIRKFAEKQMGTPDVRVDTRLNKFIWSKGVRNVPYRVRVQLSRRRNDDEDSIHKLYTLVTHVPVTTFKGLQTENVD----------RHQSDRYGKLKPNWRKPRGIDNRVRRRFKGQCLMPNIGYGSNKKTKHVLPNGFRKVVIRNVKELEMLMMMNRRFCAEIGHAVSSKKRKTIVERAQQLAIRVTNANARLRSEENEKGHKVTRPSRRKGKHARFIRDIVREVCGFAPYEKRTMELLRVSKDKRALKFCKKRLGTHLRAKRKREELSNVLIAQRKMTKGTSSFGKRRNKTHTLCRRCGRSSYHIQKSLCAQCGYPHKRLRHYNWSVKGKRRKTTGTGRLRHLRNVWRRFRHGFREGXXXXXXXXXXXXXXXXXXXXXXXXXXXXXXXXXXXXXXXXXXXXXXXXXXXDRATWKSNYFLKLVQLLDEYPKCFIVGVDNVGSRQMQHIRLSLRKHAVLLMGKNTMIRKAIRGHMENNPALEKLLPHIRGNVGFVFTKEDLVDVRDKIMDNKVKAPARAGAIAPCDVILQPQNTGLGPEKTSFFQALQIPTKISKGTIEILNEIHLIKKEDKVGASEATLLNMLNVSPFTYGLKIRQVYDSGTVFSPEILDITNEDLRAKFMEGVMNVAAVSLEIGYPTLASVPHSIVNGLKNLIAIAVETDFKEAEMAKEYLKDPSKF-DPFTRKDWYDVKAPAMFSVRNVGKTLVNRTQGTKIASEGLKGRVFEISLADLQNDEIAFRKFRLIAEEVQGRNVLTNFHGMDLTTDKLRSMVKKWQTLIEANVDVKTTDGYLLRMFCIGFTKKQVKKTCYAQHAQVKLIRKKMVETMVREVSSSDLKEVVNKLIPDSIGRDIEKACQGIYPLHDVMIRKVKVLKKPKFDVGKLMELHGPEGYEPPVLESVMLMPKAHRIAIYEYLFKEGVMVAKKDFNAPKHVPNLHVIKALQSLKSKGLVKEQFAWRHYYWYLTNEGIQHLRNVLNLPPEIVPSTLKERAFQKQPTVFLNKKKKGRYYKNVGLGFKTPREAIEGNYIDKKCPWTGNVSIRGRILRGTIIKMKMNRTIVIRRDYLHYVRKYNRFEKRHRNMSVHLSPCFQDCSIGDVVTVGECRPLSKTVRFNVLK---HRIRITLTSLNVRSLEKVCNDLIKGAKEKELKVKGPVRMPTRILRITTRKTPCGEGSKTWDKFQMRVHKRIIDLHSPSEIVKQITSISIEPGVEVEVTIADTLRTKKFMSNRLLCRKQMVVDVVHPGKGSVPKTEIREKLAKLYKTTPDVIFCFGFRTQFGGGKSTGFALIYDTLDFAKKFEPKYRLIR------------------------VRDKLNNLVLFDKPTYEKMLKEIPSYKLITPSVVSDRLKVRGSLARKALEELQSKGLIKQVVKHHSQVIYTRVTRGPKKHLKRLNAPKSWMLDKIGGVFAPRPSTGPHKLRESLPLIIMLRNRLKYALTNSEVTKIVMQRLIKVDGKVRTDSNFPAGFMDVITIEKTGEFFRLLYDVKGRFILHRITAEEAKYKLCRVKRVQVGPKGIPFLVTHDGRTIRYPDPLIKVHDTIQLDIATGKIMDFIKFDIGNLVMVTGGHNLGRVGTITSRERHPGSFDIVHVKDSQGHSFATRLNYVFVIGKSNKPFISLPRGRGVKLSVAEERDRRMKLNISYPATGCQKLIEIDDEKKLRMFYDKRMGHEVEADGLGDEWKGYVVRISGGNDKQGFPMKQGVLTSGRVRLLLSKGHSCYRPRRTGERKRKSVRGCIVDSNLSVLCLVVVKKGEQEIPGLTDTTIPRRLGPKRASKIRKLFNLSKEDDVRQFVVKRPLPQKEGKQTKAPKIQRLVTPVMLQRKRXXXXXXXXXXXXXXXXXXXXXXXXXXXXXXXXXXXXXXXXXXXXXXXXXXXXXXXXXXXXXXXXXXXXXXXXXXXXXXXXXXXXXXXXXXXXXXXXXXXXXXXXXXXXXXXXXXXXXXXXXXXXXXXXXXXXXXXXXXXXXXXXXXXXXXXXXXXXXXXXXXXMGISRDHWHKRRKTGGKRKPIRKKRKFELGRPAANTKIGPQRIHTVRTRGGNKKYRALRLDHGNFAWASEHCTRRTRIVDTVYNASNNELVRTKTLVKNGIVLIDATPFRQWYEAHYALPLGRKKGAKLKRSKKTEKKYKDRQKLAKVDPAMEDQFMSGRILACVSSRPGQCGRCDGYILEGKELEFYQRKIKAKKLCDIVCDLLLEESNIQPVFTPVTVCGDIHGQFYDLEELFRTGGQLPDTNYIFLGDFVDRGYYSLETFTRLLTLKAKWPDKITLLRGNHESRQITQVYGFYDECQTKYGNANAWRYCCKVFDLLTIAAIIDDQVLCVHGGLSPLIRTLDQIRTIERNQEIPHKGAFCDLVWSDPEVETWSVSPRGAGWLFGAKVTHEFMHLNDLKLICRAHQLVHEGYKYMFDEKLVTVWSAPNY--------GKLIAVIGDEDTCVGFLLGGIGELNKSRQTNFMVVEKNTSASEVEETFKTFVKRDDIDIILINQNIAEMIRYVIDAHPVPAVLEIPSKDHPYDPNKDSILRRAKGIFQAEEDPDIRLWVFLPIVIITFLFGIVRHYISILLTSTKDSQAIIRSRLLRENGKYIPRQAFLMRKHYFNNEDVGYFKTQNPMTDPSVMTDMVKGNFTNVLPMIIIGGWINWTFSGFVTTKVPFPLTLRFKPMLQRGIELLSLDASWVSSASWYFLNVFGLRSIYALVLGENNAADQTRTMQDQMSAPAMAMPPDPXXXXXXXXXXXXXXXXXXXXXXXXXXXXXXXXXXXXXXXXXXXXXXXXXXXXXXXXXXXXXXXXXXXXXXXXXXXXXXXXXXXXX---VLGDLHIPHRCHSLPAKFKKLLIPGRIQNILCTGNLCTKESYDYLKTLASDVHVVRGDFDENYPEQKVVTVGQFRIGLCHGHQVVPWGDPDSLALIQRQLDVDILISGHTHKFEAYEHENKFYINPGSATGAYNPLPSFVLMDIQSATVVTYVYQLVGDDVKVERIEYKKPAGDPEKGKKLFVQKCSQCHTVEKGGKHKVGPNLNGLIGRKTGQAPGFVYTEANKSKGITWNRDTLYVYLENPKKYIPGTKMVFAGLKKKNERADIIAYLE---XXXXXXXXXXXXXXXXXXXXXXXXXXXXXXXXXXXXXXXXXXXXXXXXXXXXXXXXXXXXXXXXXXXXXXXXX--FADAIRQDKLIHVRIQQRNGRKTLTTVQGISDDYDKKKIVKACKKEFACNGTVVEHSEYGEVIQLQGDQRNNICQFLTKVGIAKPEQLKIHGF---------------------------------ISLQAMDNSHVSLVSLTLRSDGFDKFRCDRNLSLGMNLGSMGKILKCASNDDIITIKAQDDTVTFVFEAPNQEKVSDYEMKLMNLDTEHLGIPETDYSVIVKMPASEFQRICRDLSQIGDSVSITCTKDGVRFSSSGDLGTGNIKLSQTANVDKEEESVIIEMQEPVSLNFALRYLNSFTKATPLAAQVQLSLSPDVPLVVEYKIEEIGYIRYYLAPKIGFVFSVSGPVVTAEKMSGAAMYELVRVGHYELVGEIIRLEGEMATIQVYEETSGVTVGDPVLRTGKPLSVELGPGIMGSIFDGIQRPLKDINELTNSIYIPRGVNVPALSREATWDFKVGSHITGGDIFGIVRENTLIKHKIMLPPKALGRVLYIAEPGSYTVDDIVLETEFDGQKSQYTMLQVWPVRQLRPVTEKLAANNPLLTGQRVLDALFPCVQGGTTAIPGAFGCGKTVISQSLSKFSNSDVIIYVGCGERGNEMSEVLRDFPELTVEIDGNVESIMKRTALVANTSNMPVAAREASIYTGITLSEYFRDMGYNVSMMADSTSRWAEALREISGRLAEMPADSGYPAYLGARLASFYERAGRVKCLGNPEREGSVTIVGAVSPPGGDFSDPVTSATLGIVQVFWGLDKKLAQRKHFPSINWLISYSKYVRALDDFYDKNFQDFVPLRTKCQQILQEEEDLSEIVQLVGKASLAETDKITLEVARLLKDDFLQQNGYTPYDKFCPFYKTVGMMRNMMAFFDLSMNAVQSTAQSNRITWTVIREAMDSILYELSSMKFMDPVKLGEKEIKRSFEELHENMQQAFRNLEDFPSRMAMTIMKGRLKAAQKGHGLLKRKADALQMRFRQILKKIVETKSLMGDVMKEAAFSLAEAKFTTGDFNHIVLQNVTKAQIKVRSKKDNVAGVNLPVFESFQNGDTYELAGLARGGQQLAKLKKNYAKAVHLLVDLASLQTSFITLDEVIKVTNRRVNALEHVVIPKIERTIAYITSELDEREREEFYRLKKIQGKMPQNEHIELHRKRYGYRFDHEERKRKKEGRLPHEMAQKAKKLRGLKAKMYNKQRFSEKVQMKKTLRMHEEKKTKAVPAYLLDREQLRAKILSNTIKQKRKEKAGKWAVPLPKVRGVSEAETFRVIKTGKRQKKAWKRMVTKVCYVGEGFTRKPPKFERFIRPMGLRFNKAHVTHPELKATFYLSIIGVKKNPNSALFTNLGVITKGTVIEVNISELGLVTQGGKVVWGKYAQVTNNPENDGCINAVLL
[truncated: 1,545,404 more chars]
